# Supplementary material
Source: publisher site journal article supplement (https://www.spandidos-publications.com/6655/downloadSupplementary)
Supplement: Supplementary file 1 [file downloadSupplementary]

## Sheet: Sheet1
Table SVI. Module membership and gene significance for tumors in the turquoise module.
probes	module Color	GS. Normal	p.GS. Normal	GS . Tumor	p.GS. Tumor	MM green	p.MM green	MM black	p.MM black	MM red	p.MM red	MM brown	p.MM brown	MM pink	p.MM pink	MM greenyellow	p.MM greenyellow	MM magenta	p.MM magenta	MM blue	p.MM blue	MM turquoise	p.MM turquoise
DPYD	black	0.056	0.62	-0.056	0.62	-0.18	0.11	0.34	0.0015	0.23	0.04	0.14	0.19	0.074	0.5	-0.36	0.00075	-0.048	0.67	-0.13	0.24	-0.042	0.71
PDCD1LG2	black	-0.24	0.031	0.24	0.031	0.094	0.4	0.61	1e-09	0.48	5.2e-06	-0.15	0.19	-0.38	0.00045	-0.4	0.00019	-0.22	0.05	-0.14	0.21	-0.21	0.06
HLA-F	black	-0.33	0.0023	0.33	0.0023	-0.016	0.89	0.7	2.1e-13	0.36	0.00078	-0.1	0.36	-0.45	2.1e-05	-0.56	3.2e-08	-0.32	0.0029	-0.24	0.027	-0.27	0.012
GZMB	black	-0.2	0.073	0.2	0.073	-0.069	0.54	0.67	6e-12	0.47	8e-06	-0.0031	0.98	-0.24	0.028	-0.36	0.00078	-0.24	0.026	-0.21	0.058	-0.25	0.024
SPAST	black	0.043	0.7	-0.043	0.7	-0.0079	0.94	-0.37	0.00066	-0.3	0.0064	-0.067	0.55	0.22	0.044	0.42	9e-05	0.01	0.93	0.1	0.35	0.038	0.73
GBP4	black	-0.19	0.092	0.19	0.092	-0.15	0.16	0.75	2.1e-16	0.46	9.5e-06	-2.3e-05	1	-0.09	0.42	-0.42	7.1e-05	-0.23	0.036	-0.21	0.056	-0.16	0.15
IL21R	black	-0.16	0.15	0.16	0.15	0.042	0.71	0.57	2.3e-08	0.5	1.3e-06	-0.048	0.67	-0.12	0.26	-0.2	0.063	-0.19	0.085	-0.13	0.24	-0.033	0.77
PCED1B	black	-0.21	0.062	0.21	0.062	0.15	0.17	0.42	6.2e-05	0.36	0.00073	-0.13	0.23	-0.38	0.00034	-0.31	0.0042	-0.097	0.38	-0.14	0.21	-0.11	0.31
IFITM3	black	-0.22	0.044	0.22	0.044	0.031	0.78	0.44	3.2e-05	0.26	0.018	-0.14	0.22	-0.36	0.00095	-0.36	0.00095	-0.079	0.48	-0.13	0.26	-0.12	0.26
GLRX	black	0.029	0.79	-0.029	0.79	-0.018	0.87	0.51	7.5e-07	0.47	6e-06	0.15	0.19	0.068	0.54	-0.26	0.016	0.073	0.51	0.0017	0.99	0.18	0.1
ZNF45	black	-0.063	0.57	0.063	0.57	0.095	0.39	0.32	0.003	0.26	0.018	-0.036	0.74	-0.22	0.048	-0.29	0.0077	-0.12	0.29	-0.036	0.74	-0.028	0.8
NMB	black	-0.16	0.14	0.16	0.14	-0.043	0.7	-0.29	0.0075	-0.28	0.01	-0.15	0.18	0.081	0.47	0.4	0.00021	0.009	0.94	-0.0078	0.94	-0.0084	0.94
ZNF831	black	0.054	0.63	-0.054	0.63	-0.027	0.81	0.51	7.7e-07	0.44	3.4e-05	0.12	0.27	0.022	0.84	-0.29	0.0074	-0.098	0.38	-0.097	0.38	0.13	0.24
NCF1	black	-0.11	0.32	0.11	0.32	-0.0024	0.98	0.46	1.3e-05	0.47	8.3e-06	0.14	0.21	-0.056	0.62	-0.28	0.0097	-0.16	0.14	-0.1	0.37	-0.048	0.67
RNFT2	black	-0.11	0.3	0.11	0.3	-0.12	0.3	-0.38	0.00039	-0.32	0.003	-0.22	0.042	0.077	0.49	0.56	3.5e-08	0.025	0.83	-0.09	0.42	0.1	0.35
NAA60	black	-0.0043	0.97	0.0043	0.97	-0.047	0.67	0.3	0.0051	0.21	0.052	-0.087	0.43	-0.14	0.22	-0.2	0.073	-0.18	0.11	-0.064	0.57	0.084	0.45
UBE2L6	black	-0.31	0.0044	0.31	0.0044	-0.05	0.65	0.67	4.7e-12	0.37	0.00051	0.015	0.9	-0.3	0.0052	-0.5	1.2e-06	-0.29	0.0072	-0.27	0.013	-0.25	0.025
CTLA4	black	-0.27	0.014	0.27	0.014	0.18	0.11	0.63	2.3e-10	0.58	8e-09	-0.028	0.8	-0.34	0.0019	-0.4	0.00016	-0.2	0.071	-0.12	0.28	-0.16	0.15
SYNJ1	black	-0.11	0.34	0.11	0.34	0.12	0.29	0.31	0.0039	0.29	0.0084	0.11	0.31	-0.025	0.82	-0.27	0.014	-0.092	0.41	0.045	0.69	0.048	0.66
PAIP2	black	-0.0054	0.96	0.0054	0.96	0.027	0.81	0.34	0.0019	0.22	0.049	0.058	0.6	-0.046	0.68	-0.26	0.017	-0.086	0.44	0.06	0.59	0.12	0.27
HNRNPA1L2	black	0.1	0.36	-0.1	0.36	-0.11	0.34	0.25	0.021	0.19	0.091	0.049	0.66	0.07	0.53	-0.18	0.1	-0.0036	0.97	-0.088	0.43	0.064	0.57
GNAI2	black	-0.16	0.14	0.16	0.14	0.24	0.027	0.43	4e-05	0.35	0.0013	-0.13	0.25	-0.34	0.0018	-0.38	0.00035	-0.16	0.16	0.12	0.28	-0.089	0.42
APOL3	black	-0.082	0.46	0.082	0.46	0.008	0.94	0.74	1.7e-15	0.56	3e-08	-0.0029	0.98	-0.18	0.1	-0.51	8.2e-07	-0.21	0.062	-0.00027	1	-0.024	0.83
PARP8	black	0.023	0.83	-0.023	0.83	-0.016	0.89	0.48	4.5e-06	0.38	0.00047	-0.045	0.69	-0.015	0.89	-0.32	0.0037	-0.064	0.56	-0.1	0.35	0.16	0.14
FAAP24	black	-0.19	0.088	0.19	0.088	0.08	0.47	0.36	0.00075	0.23	0.038	-0.13	0.24	-0.22	0.05	-0.29	0.0081	-0.15	0.17	-0.095	0.39	-0.073	0.51
SHFL	black	-0.062	0.58	0.062	0.58	0.091	0.41	0.48	4.9e-06	0.29	0.0068	-0.22	0.046	-0.35	0.0013	-0.25	0.024	-0.095	0.39	0.033	0.77	0.065	0.56
ICOS	black	-0.28	0.0097	0.28	0.0097	0.19	0.086	0.58	6.6e-09	0.6	1.9e-09	-0.087	0.43	-0.28	0.0092	-0.29	0.0086	-0.24	0.029	-0.14	0.21	-0.13	0.25
PML	black	-0.33	0.0022	0.33	0.0022	0.052	0.64	0.58	1e-08	0.26	0.019	0.028	0.8	-0.32	0.0031	-0.48	5.1e-06	-0.31	0.0042	-0.27	0.014	-0.26	0.018
C1QTNF12	black	-0.11	0.32	0.11	0.32	-0.053	0.63	-0.41	0.00012	-0.35	0.0012	-0.1	0.36	0.058	0.6	0.44	2.7e-05	0.2	0.073	-0.087	0.44	0.023	0.83
TSLP	black	-0.069	0.54	0.069	0.54	0.077	0.49	0.37	0.00069	0.23	0.04	0.072	0.52	-0.09	0.42	-0.16	0.14	-0.12	0.27	-0.12	0.26	-0.048	0.67
IFIT1	black	-0.29	0.0069	0.29	0.0069	0.067	0.55	0.79	8.4e-19	0.53	3e-07	-0.096	0.39	-0.38	0.00041	-0.5	1.3e-06	-0.25	0.021	-0.15	0.17	-0.22	0.049
ZNF79	black	-0.12	0.29	0.12	0.29	0.015	0.89	0.27	0.013	0.27	0.013	0.017	0.88	-0.036	0.75	-0.16	0.15	0.031	0.78	-0.085	0.44	0.073	0.51
IFIH1	black	-0.24	0.028	0.24	0.028	0.04	0.72	0.74	1.1e-15	0.49	3e-06	0.012	0.91	-0.29	0.0074	-0.52	6.2e-07	-0.31	0.0041	-0.18	0.11	-0.15	0.17
CHMP5	black	0.095	0.39	-0.095	0.39	-0.12	0.29	0.34	0.0019	0.22	0.045	0.081	0.46	0.13	0.26	-0.26	0.016	0.0052	0.96	0.026	0.81	0.11	0.31
NT5DC2	black	0.11	0.34	-0.11	0.34	-0.12	0.3	-0.42	8e-05	-0.38	0.0004	0.067	0.55	0.17	0.12	0.22	0.045	0.0097	0.93	-0.018	0.87	0.1	0.36
DENND2B	black	-0.019	0.86	0.019	0.86	0.12	0.29	0.46	1.3e-05	0.35	0.0012	-0.022	0.84	-0.054	0.63	-0.33	0.0025	-0.2	0.07	-0.011	0.92	0.12	0.28
EPSTI1	black	-0.36	0.00096	0.36	0.00096	0.17	0.13	0.78	2.1e-18	0.56	2.8e-08	-0.073	0.51	-0.5	1.6e-06	-0.61	1.3e-09	-0.3	0.0068	-0.15	0.18	-0.22	0.048
ZAP70	black	-0.18	0.1	0.18	0.1	0.075	0.5	0.55	5.7e-08	0.44	2.9e-05	-0.022	0.84	-0.16	0.14	-0.3	0.0051	-0.16	0.15	-0.027	0.81	-0.04	0.72
FAM200A	black	-0.12	0.29	0.12	0.29	0.077	0.49	0.38	0.00034	0.3	0.0053	-0.083	0.45	-0.2	0.069	-0.23	0.033	-0.19	0.089	0.053	0.63	0.00087	0.99
TAPBP	black	-0.096	0.39	0.096	0.39	-0.15	0.16	0.5	1.3e-06	0.26	0.019	-0.071	0.53	-0.16	0.16	-0.43	4.4e-05	-0.046	0.68	-0.18	0.11	0.049	0.66
STARD4	black	-0.3	0.0059	0.3	0.0059	0.11	0.31	0.44	2.7e-05	0.21	0.058	0.00047	1	-0.39	0.00022	-0.47	7.9e-06	-0.17	0.12	-0.18	0.11	-0.17	0.13
HEXIM1	black	0.014	0.9	-0.014	0.9	-0.13	0.26	0.35	0.0012	0.13	0.26	0.15	0.18	0.059	0.6	-0.23	0.039	0.019	0.86	-0.063	0.57	-0.022	0.84
GNB4	black	-0.098	0.38	0.098	0.38	0.2	0.077	0.37	0.00049	0.26	0.017	-0.066	0.56	-0.3	0.0057	-0.28	0.011	0.021	0.85	-0.012	0.91	-4.4e-05	1
RRP8	black	-0.15	0.17	0.15	0.17	-0.035	0.75	0.4	0.00017	0.17	0.12	0.0085	0.94	-0.13	0.22	-0.31	0.0038	-0.18	0.095	-0.14	0.19	-0.012	0.91
CLEC2B	black	-0.22	0.045	0.22	0.045	-0.069	0.53	0.61	1.3e-09	0.34	0.0014	-0.08	0.47	-0.22	0.047	-0.49	2.5e-06	-0.21	0.061	-0.17	0.13	-0.12	0.28
PSTPIP1	black	-0.19	0.085	0.19	0.085	0.14	0.21	0.32	0.0027	0.33	0.0026	0.018	0.87	-0.11	0.31	-0.14	0.2	-0.16	0.14	-0.014	0.9	-0.013	0.91
CXCL9	black	-0.32	0.0037	0.32	0.0037	0.15	0.19	0.83	2.2e-22	0.67	4.3e-12	0.14	0.21	-0.25	0.023	-0.49	2.7e-06	-0.28	0.01	-0.14	0.2	-0.16	0.14
HSH2D	black	-0.056	0.61	0.056	0.61	0.1	0.35	0.46	1e-05	0.4	0.00017	-0.25	0.023	-0.18	0.099	-0.13	0.25	-0.071	0.53	0.017	0.88	0.17	0.12
TIGIT	black	-0.19	0.093	0.19	0.093	0.26	0.019	0.54	1.1e-07	0.57	1.8e-08	0.069	0.54	-0.11	0.33	-0.32	0.0033	-0.21	0.059	-0.099	0.38	0.012	0.91
CSTF3	black	-0.11	0.33	0.11	0.33	0.05	0.66	0.34	0.0014	0.23	0.035	-0.054	0.62	-0.13	0.23	-0.27	0.014	-0.15	0.17	-0.052	0.64	-0.037	0.74
ZC3H12C	black	0.014	0.9	-0.014	0.9	0.12	0.29	0.35	0.0012	0.2	0.068	0.088	0.43	-0.29	0.0085	-0.46	1.2e-05	-0.13	0.24	-0.00033	1	0.004	0.97
LAG3	black	-0.27	0.013	0.27	0.013	0.11	0.33	0.68	1.7e-12	0.6	2.3e-09	-0.18	0.096	-0.36	0.00083	-0.39	0.00024	-0.19	0.093	-0.19	0.086	-0.11	0.32
HLA-A	black	-0.24	0.028	0.24	0.028	0.044	0.69	0.57	2.3e-08	0.33	0.002	0.017	0.88	-0.24	0.032	-0.4	0.00022	-0.19	0.086	-0.083	0.46	-0.01	0.93
DDX60L	black	-0.27	0.015	0.27	0.015	0.06	0.59	0.66	1.2e-11	0.4	0.0002	0.1	0.37	-0.32	0.0037	-0.55	5.9e-08	-0.24	0.026	-0.36	0.00078	-0.16	0.15
MRPL50	black	-0.04	0.72	0.04	0.72	0.019	0.86	0.33	0.0022	0.28	0.011	-0.0059	0.96	-0.12	0.29	-0.18	0.11	-0.19	0.089	-0.031	0.78	-0.11	0.33
IFIT5	black	-0.22	0.043	0.22	0.043	-0.078	0.48	0.65	2.8e-11	0.36	0.00093	0.086	0.44	-0.16	0.15	-0.5	1.2e-06	-0.25	0.021	-0.29	0.0071	-0.23	0.033
MICALL2	black	-0.013	0.9	0.013	0.9	0.0072	0.95	0.29	0.0089	0.19	0.088	-0.086	0.44	-0.1	0.37	-0.24	0.032	-0.1	0.37	-0.068	0.54	0.032	0.77
TRIM33	black	-0.045	0.69	0.045	0.69	0.049	0.66	0.34	0.0016	0.33	0.0021	-0.05	0.66	-0.1	0.36	-0.26	0.017	-0.14	0.21	-0.082	0.46	0.048	0.67
CD274	black	-0.15	0.17	0.15	0.17	0.01	0.93	0.71	8.1e-14	0.55	9e-08	0.076	0.49	-0.2	0.072	-0.5	1.9e-06	-0.24	0.03	-0.078	0.48	-0.16	0.16
MX2	black	-0.18	0.1	0.18	0.1	-0.084	0.45	0.78	5.8e-18	0.51	1.1e-06	0.063	0.57	-0.13	0.26	-0.48	5.4e-06	-0.22	0.051	-0.14	0.21	-0.1	0.36
ACAP1	black	-0.25	0.025	0.25	0.025	0.17	0.13	0.38	0.0004	0.36	0.00084	-0.061	0.59	-0.23	0.034	-0.076	0.49	-0.085	0.44	-0.075	0.5	0.026	0.82
MYCBP2	black	-0.019	0.87	0.019	0.87	-0.025	0.82	0.42	8.3e-05	0.27	0.012	0.16	0.15	-0.045	0.69	-0.36	0.00071	-0.1	0.35	-0.14	0.2	-0.016	0.89
TBC1D10C	black	-0.21	0.056	0.21	0.056	0.24	0.029	0.58	9.2e-09	0.66	1.7e-11	-0.051	0.65	-0.22	0.049	-0.28	0.01	-0.1	0.36	-0.081	0.47	0.0021	0.99
CD3D	black	-0.17	0.13	0.17	0.13	0.024	0.83	0.64	4.8e-11	0.51	6.9e-07	-0.018	0.87	-0.2	0.065	-0.31	0.0049	-0.14	0.19	-0.16	0.16	-0.081	0.47
TTC1	black	-0.052	0.64	0.052	0.64	-0.04	0.72	0.37	0.00068	0.23	0.037	-0.024	0.83	-0.14	0.21	-0.35	0.0012	-0.1	0.35	-0.056	0.61	0.02	0.86
ISG15	black	-0.55	9.9e-08	0.55	9.9e-08	0.19	0.091	0.72	1.3e-14	0.5	1.9e-06	-0.13	0.23	-0.62	3.7e-10	-0.47	8.8e-06	-0.35	0.0011	-0.29	0.0086	-0.38	0.00033
PRF1	black	-0.27	0.013	0.27	0.013	0.056	0.61	0.76	8.5e-17	0.61	1.2e-09	-0.097	0.39	-0.33	0.0023	-0.46	1.2e-05	-0.27	0.013	-0.13	0.25	-0.15	0.19
ZUP1	black	-0.03	0.79	0.03	0.79	-0.16	0.15	0.4	0.00018	0.11	0.33	0.2	0.07	-0.048	0.67	-0.3	0.0052	-0.17	0.13	-0.15	0.18	-0.00048	1
MAX	black	0.007	0.95	-0.007	0.95	-0.044	0.7	0.33	0.0026	0.23	0.041	-0.013	0.91	-0.043	0.7	-0.22	0.045	-0.00055	1	-0.068	0.54	0.078	0.48
IFI35	black	-0.32	0.0031	0.32	0.0031	0.074	0.51	0.69	5.6e-13	0.44	2.6e-05	-0.12	0.27	-0.37	0.00051	-0.46	9.6e-06	-0.23	0.038	-0.11	0.33	-0.19	0.086
POLR2K	black	-0.1	0.36	0.1	0.36	0.00099	0.99	0.32	0.0029	0.28	0.0094	-0.076	0.5	-0.084	0.45	-0.14	0.21	0.12	0.29	-0.082	0.46	0.11	0.32
B4GALT1	black	-0.13	0.25	0.13	0.25	0.19	0.092	0.33	0.0026	0.3	0.0052	-0.0054	0.96	-0.15	0.19	-0.4	0.0002	-0.13	0.24	-0.035	0.75	0.03	0.79
TAOK3	black	-0.013	0.9	0.013	0.9	0.071	0.52	0.41	0.00012	0.31	0.0043	0.036	0.75	-0.22	0.044	-0.52	4.4e-07	-0.092	0.41	-0.016	0.88	-0.0028	0.98
SPI1	black	-0.024	0.83	0.024	0.83	0.2	0.073	0.61	9.4e-10	0.69	8.4e-13	0.0072	0.95	-0.22	0.049	-0.48	5.4e-06	-0.18	0.098	-0.06	0.59	0.095	0.39
ABAT	black	0.094	0.4	-0.094	0.4	-0.022	0.85	-0.29	0.008	-0.21	0.053	-0.066	0.55	0.21	0.061	0.14	0.21	0.1	0.35	0.099	0.37	0.086	0.44
IFIT3	black	-0.26	0.016	0.26	0.016	0.091	0.41	0.82	2.1e-21	0.55	8.4e-08	-0.096	0.39	-0.37	0.00064	-0.63	2e-10	-0.22	0.045	-0.12	0.3	-0.13	0.24
HLA-DQA2	black	-0.17	0.12	0.17	0.12	0.058	0.6	0.62	4.8e-10	0.57	2.1e-08	0.17	0.12	-0.07	0.53	-0.45	2e-05	-0.17	0.13	-0.12	0.29	-0.074	0.51
IFIT2	black	-0.21	0.057	0.21	0.057	0.18	0.11	0.69	5.7e-13	0.6	2e-09	-0.2	0.068	-0.37	0.0005	-0.47	6.7e-06	-0.2	0.076	-0.11	0.33	-0.12	0.29
CD247	black	-0.19	0.092	0.19	0.092	0.11	0.32	0.58	6.5e-09	0.64	5.1e-11	0.067	0.55	-0.077	0.49	-0.26	0.02	-0.13	0.23	-0.03	0.79	-0.028	0.8
RSAD2	black	-0.37	0.00048	0.37	0.00048	0.099	0.37	0.84	4.7e-23	0.62	5e-10	0.06	0.59	-0.35	0.001	-0.54	1.5e-07	-0.23	0.04	-0.2	0.066	-0.22	0.044
FURIN	black	-0.2	0.064	0.2	0.064	0.19	0.082	0.41	0.00013	0.29	0.0072	0.063	0.57	-0.33	0.0026	-0.33	0.0025	-0.023	0.84	-0.047	0.68	-0.0025	0.98
RTP4	black	-0.17	0.13	0.17	0.13	-0.068	0.54	0.52	3.8e-07	0.26	0.017	-0.17	0.12	-0.15	0.18	-0.26	0.016	-0.19	0.086	-0.19	0.088	0.13	0.24
SPPL2B	black	-0.063	0.57	0.063	0.57	-0.012	0.91	0.31	0.0045	0.24	0.027	0.068	0.54	-0.057	0.61	-0.3	0.0052	0.0089	0.94	-0.053	0.64	0.043	0.7
RBCK1	black	0.002	0.99	-0.002	0.99	-0.07	0.53	0.32	0.0033	0.21	0.055	-0.11	0.34	-0.12	0.26	-0.26	0.019	-0.054	0.63	-0.055	0.62	0.031	0.78
FLT3LG	black	-0.2	0.069	0.2	0.069	0.013	0.91	0.43	6e-05	0.33	0.0025	-0.042	0.71	-0.22	0.05	-0.32	0.0035	-0.18	0.1	-0.14	0.22	-0.062	0.58
GZMA	black	-0.055	0.62	0.055	0.62	0.032	0.77	0.68	2.1e-12	0.54	1.2e-07	-0.12	0.27	-0.17	0.11	-0.41	0.00012	-0.17	0.12	-0.046	0.68	0.027	0.81
GNAQ	black	-0.0095	0.93	0.0095	0.93	-0.079	0.48	0.31	0.0045	0.15	0.17	-0.019	0.86	-0.064	0.57	-0.31	0.0039	-0.027	0.81	-0.035	0.76	0.019	0.87
IL15	black	-0.12	0.28	0.12	0.28	0.079	0.48	0.39	0.00023	0.24	0.029	-0.18	0.1	-0.3	0.0053	-0.29	0.0088	-0.13	0.23	-0.025	0.82	-0.0083	0.94
SLC15A3	black	-0.33	0.0024	0.33	0.0024	0.17	0.14	0.65	2e-11	0.57	2.6e-08	-0.13	0.24	-0.4	0.00019	-0.36	0.00078	-0.24	0.026	-0.15	0.17	-0.16	0.15
PUM3	black	-0.12	0.27	0.12	0.27	-0.077	0.49	0.51	1e-06	0.29	0.0081	0.053	0.64	-0.19	0.079	-0.48	4.4e-06	-0.22	0.047	-0.17	0.13	-0.19	0.091
KIF21B	black	-0.22	0.041	0.22	0.041	0.17	0.12	0.44	2.8e-05	0.44	3.5e-05	-0.046	0.68	-0.32	0.0031	-0.4	0.00022	-0.18	0.11	-0.056	0.62	-0.071	0.52
INPP5A	black	0.015	0.89	-0.015	0.89	-0.053	0.64	-0.4	0.00022	-0.43	4.8e-05	-0.064	0.57	-0.015	0.9	0.17	0.12	0.15	0.19	0.088	0.43	0.077	0.49
AGAP2	black	-0.099	0.38	0.099	0.38	0.2	0.074	0.29	0.007	0.31	0.0043	0.054	0.63	-0.2	0.069	-0.17	0.12	0.17	0.12	-0.084	0.45	0.031	0.78
ACKR4	black	0.01	0.93	-0.01	0.93	0.12	0.28	0.41	0.0001	0.39	0.00024	0.12	0.27	-0.069	0.54	-0.24	0.029	-0.11	0.34	0.1	0.37	0.045	0.69
RTN4RL2	black	0.018	0.87	-0.018	0.87	-0.025	0.82	-0.4	0.00018	-0.3	0.0052	-0.25	0.026	-0.093	0.4	0.42	6.9e-05	0.1	0.35	0.11	0.33	0.15	0.18
HLA-DOB	black	-0.1	0.35	0.1	0.35	0.086	0.44	0.4	0.00015	0.37	0.00056	0.002	0.99	-0.12	0.26	-0.16	0.14	-0.14	0.2	-0.1	0.37	0.11	0.33
IL15RA	black	-0.22	0.049	0.22	0.049	0.21	0.051	0.49	2e-06	0.38	0.00048	-0.036	0.75	-0.36	0.00094	-0.28	0.011	-0.035	0.75	-0.13	0.26	-0.2	0.067
PLEKHA2	black	-0.15	0.17	0.15	0.17	0.086	0.44	0.37	0.00061	0.28	0.01	-0.012	0.92	-0.19	0.083	-0.33	0.0026	-0.062	0.58	-0.04	0.72	-0.00068	1
TRAFD1	black	-0.078	0.48	0.078	0.48	-0.032	0.78	0.4	0.00017	0.28	0.011	0.21	0.061	0.017	0.88	-0.28	0.011	-0.036	0.75	-0.12	0.3	0.014	0.9
LRPPRC	black	-0.044	0.69	0.044	0.69	-0.021	0.85	-0.31	0.0038	-0.3	0.0065	-0.1	0.36	0.009	0.94	0.21	0.057	0.052	0.64	0.068	0.54	-0.072	0.52
RCOR2	black	-0.14	0.2	0.14	0.2	-0.051	0.64	-0.42	7.1e-05	-0.37	0.00066	-0.34	0.0018	-0.035	0.76	0.53	2.5e-07	-0.054	0.63	0.0082	0.94	-0.03	0.79
TAP2	black	-0.31	0.0044	0.31	0.0044	-0.13	0.22	0.58	6.6e-09	0.31	0.0038	0.081	0.47	-0.19	0.092	-0.49	3.2e-06	-0.3	0.0062	-0.26	0.016	-0.32	0.0032
MX1	black	-0.19	0.087	0.19	0.087	-0.05	0.65	0.73	4.1e-15	0.43	5.8e-05	0.11	0.34	-0.21	0.059	-0.56	4.7e-08	-0.3	0.0057	-0.2	0.073	-0.18	0.11
PYCR1	black	0.037	0.74	-0.037	0.74	0.04	0.72	-0.34	0.0018	-0.28	0.011	-0.19	0.09	-0.072	0.52	0.28	0.01	0.024	0.83	0.097	0.38	0.043	0.7
CASP7	black	-0.14	0.19	0.14	0.19	0.023	0.83	0.34	0.0019	0.25	0.023	-0.048	0.67	-0.17	0.12	-0.19	0.082	-0.1	0.36	-0.11	0.3	-0.0034	0.98
RAC3	black	-0.063	0.57	0.063	0.57	-0.068	0.54	-0.43	4.1e-05	-0.41	0.00012	-0.17	0.11	-0.022	0.84	0.37	0.00048	-0.028	0.8	-0.054	0.63	-0.0082	0.94
PSMB9	black	-0.28	0.0097	0.28	0.0097	-0.0053	0.96	0.65	2.6e-11	0.41	0.00011	0.0067	0.95	-0.31	0.0043	-0.45	1.6e-05	-0.28	0.011	-0.17	0.12	-0.29	0.0071
LAMP3	black	-0.31	0.0039	0.31	0.0039	0.1	0.37	0.49	2.2e-06	0.43	4.5e-05	0.15	0.18	-0.11	0.34	-0.2	0.071	-0.21	0.059	-0.26	0.019	-0.28	0.0094
NLRC5	black	-0.24	0.031	0.24	0.031	0.14	0.2	0.52	5.2e-07	0.38	0.00035	0.084	0.45	-0.33	0.0024	-0.37	0.0005	-0.16	0.15	-0.15	0.17	-0.22	0.049
AKR1C1	black	-0.037	0.74	0.037	0.74	-0.14	0.22	-0.29	0.0071	-0.26	0.017	-0.015	0.89	0.19	0.08	0.37	0.0006	-0.12	0.28	-0.042	0.71	-0.0034	0.98
PLSCR1	black	-0.19	0.087	0.19	0.087	0.082	0.46	0.48	5.5e-06	0.32	0.003	-0.044	0.69	-0.22	0.048	-0.29	0.007	-0.14	0.19	-0.15	0.17	-0.14	0.21
KIF24	black	-0.12	0.29	0.12	0.29	0.038	0.73	0.41	0.00011	0.29	0.0076	-0.062	0.58	-0.2	0.072	-0.29	0.0071	-0.042	0.71	-0.01	0.93	-0.16	0.14
IFI44L	black	-0.3	0.006	0.3	0.006	0.13	0.25	0.79	8.5e-19	0.59	4.8e-09	-0.032	0.78	-0.3	0.0053	-0.42	7e-05	-0.2	0.067	-0.15	0.17	-0.16	0.16
ACSL5	black	0.011	0.92	-0.011	0.92	0.05	0.65	0.54	1.7e-07	0.42	6.8e-05	0.02	0.86	-0.065	0.56	-0.25	0.023	0.15	0.16	-0.026	0.81	0.11	0.32
GBP2	black	-0.03	0.78	0.03	0.78	-0.0094	0.93	0.5	1.8e-06	0.43	4.9e-05	0.092	0.41	0.16	0.15	-0.14	0.21	0.0051	0.96	-0.0011	0.99	0.18	0.098
IRF7	black	-0.18	0.1	0.18	0.1	-0.022	0.84	0.61	8.6e-10	0.37	0.00058	0.18	0.098	-0.2	0.067	-0.46	9.7e-06	-0.24	0.03	-0.2	0.074	-0.12	0.29
PARP10	black	-0.13	0.23	0.13	0.23	0.0087	0.94	0.42	9.5e-05	0.3	0.0051	-0.25	0.021	-0.23	0.041	-0.037	0.74	-0.0062	0.96	-0.049	0.66	0.12	0.27
LAP3	black	0.034	0.76	-0.034	0.76	0.069	0.53	0.55	6e-08	0.45	1.8e-05	0.041	0.71	-0.073	0.51	-0.27	0.015	-0.033	0.76	0.0081	0.94	0.097	0.39
XAF1	black	-0.31	0.0042	0.31	0.0042	0.082	0.46	0.79	7.2e-19	0.49	2.6e-06	0.019	0.86	-0.28	0.0096	-0.46	1e-05	-0.21	0.061	-0.22	0.042	-0.23	0.039
STAT4	black	-0.23	0.034	0.23	0.034	0.18	0.11	0.35	0.0013	0.34	0.0018	-0.041	0.71	-0.24	0.029	-0.22	0.047	-0.12	0.28	-0.051	0.65	-0.11	0.31
SLC28A3	black	-0.35	0.0013	0.35	0.0013	0.033	0.77	0.54	1.4e-07	0.33	0.0024	0.33	0.0026	-0.2	0.075	-0.44	2.8e-05	-0.21	0.055	-0.28	0.0093	-0.23	0.033
HERC5	black	-0.18	0.098	0.18	0.098	0.17	0.13	0.54	1.1e-07	0.43	6.2e-05	-0.24	0.028	-0.29	0.0073	-0.23	0.033	-0.061	0.58	0.058	0.6	0.012	0.92
JADE2	black	-0.2	0.065	0.2	0.065	0.17	0.14	0.49	3.2e-06	0.38	0.00037	0.053	0.64	-0.19	0.085	-0.22	0.046	-0.2	0.075	-0.098	0.38	-0.086	0.44
DCXR	black	0.24	0.031	-0.24	0.031	-0.23	0.035	-0.41	0.00014	-0.35	0.0014	-0.069	0.54	0.37	0.0005	0.35	0.0013	0.068	0.54	0.049	0.66	0.23	0.034
TRIM38	black	-0.041	0.71	0.041	0.71	0.023	0.84	0.37	0.00057	0.29	0.0083	0.058	0.6	-0.031	0.78	-0.28	0.0094	-0.069	0.53	-0.043	0.7	-0.026	0.82
NUB1	black	-0.058	0.6	0.058	0.6	0.079	0.48	0.44	3.9e-05	0.34	0.0015	-0.074	0.5	-0.15	0.16	-0.26	0.016	-0.092	0.41	0.066	0.55	0.091	0.41
RHEX	black	-0.21	0.057	0.21	0.057	-0.05	0.65	0.57	1.5e-08	0.35	0.001	0.19	0.082	-0.068	0.54	-0.34	0.0017	-0.11	0.33	-0.2	0.068	-0.1	0.36
CXCR3	black	-0.1	0.36	0.1	0.36	0.13	0.24	0.63	1.9e-10	0.62	4.4e-10	0.046	0.68	-0.14	0.2	-0.37	0.00056	-0.15	0.18	-0.072	0.52	0.025	0.82
OAS2	black	-0.46	1.5e-05	0.46	1.5e-05	0.11	0.34	0.71	4.7e-14	0.42	7.2e-05	0.011	0.92	-0.41	9.7e-05	-0.49	2e-06	-0.36	0.00096	-0.31	0.0044	-0.37	0.00049
TRIM22	black	-0.046	0.68	0.046	0.68	0.037	0.74	0.64	6.1e-11	0.42	8.5e-05	0.036	0.75	-0.1	0.36	-0.37	0.00068	-0.08	0.47	-0.074	0.5	0.054	0.63
SAMD12	black	-0.021	0.85	0.021	0.85	-0.2	0.075	-0.39	0.00026	-0.34	0.0016	0.058	0.6	0.37	0.00067	0.49	2.4e-06	0.012	0.92	-0.13	0.24	0.1	0.35
CMPK2	black	-0.27	0.013	0.27	0.013	0.22	0.046	0.76	7.6e-17	0.58	9.4e-09	0.00019	1	-0.31	0.0038	-0.45	2.2e-05	-0.2	0.077	-0.1	0.36	-0.17	0.12
ITK	black	-0.15	0.16	0.15	0.16	0.062	0.58	0.44	2.8e-05	0.43	4.9e-05	0.27	0.013	0.14	0.21	-0.12	0.26	-0.16	0.15	-0.11	0.32	0.0018	0.99
CD3E	black	-0.19	0.082	0.19	0.082	0.051	0.64	0.57	1.4e-08	0.52	5.3e-07	0.1	0.36	-0.0066	0.95	-0.26	0.018	-0.078	0.48	-0.18	0.11	-0.0092	0.93
APOL6	black	-0.11	0.33	0.11	0.33	0.037	0.74	0.68	1.5e-12	0.52	4.8e-07	0.24	0.028	-0.054	0.63	-0.54	1.3e-07	-0.22	0.049	-0.11	0.32	-0.065	0.56
LPXN	black	-0.15	0.18	0.15	0.18	0.24	0.026	0.43	5e-05	0.41	0.0001	-0.15	0.17	-0.29	0.0087	-0.26	0.016	-0.049	0.66	0.0053	0.96	-0.1	0.36
RNF216	black	-0.089	0.42	0.089	0.42	0.096	0.39	0.3	0.0065	0.31	0.005	-0.08	0.47	-0.12	0.29	-0.11	0.31	-0.19	0.086	0.06	0.59	-0.0099	0.93
EOMES	black	-0.21	0.053	0.21	0.053	0.2	0.069	0.34	0.0019	0.38	0.0004	0.042	0.71	-0.25	0.021	-0.25	0.025	-0.15	0.18	-0.11	0.34	-0.13	0.24
GRINA	black	-0.21	0.057	0.21	0.057	0.16	0.14	0.39	0.00026	0.38	0.00043	-0.11	0.34	-0.22	0.045	-0.26	0.018	-0.12	0.29	0.032	0.77	-0.1	0.36
BAIAP3	black	0.012	0.91	-0.012	0.91	-0.018	0.87	-0.31	0.0048	-0.28	0.011	-0.11	0.33	0.033	0.77	0.28	0.0096	0.028	0.8	0.076	0.49	0.099	0.37
BST2	black	-0.45	2e-05	0.45	2e-05	0.014	0.9	0.64	9.6e-11	0.35	0.0012	0.049	0.66	-0.35	0.0014	-0.36	0.0008	-0.3	0.0052	-0.34	0.0015	-0.34	0.0014
TNFSF10	black	-0.21	0.058	0.21	0.058	-0.038	0.73	0.49	2.9e-06	0.25	0.021	0.03	0.79	-0.084	0.45	-0.34	0.0017	-0.17	0.12	-0.24	0.027	-0.13	0.23
CXCL11	black	-0.32	0.0034	0.32	0.0034	-0.035	0.75	0.84	3.5e-23	0.57	1.7e-08	-0.029	0.79	-0.36	0.00077	-0.54	1.2e-07	-0.26	0.016	-0.25	0.023	-0.28	0.011
OAS3	black	-0.45	1.9e-05	0.45	1.9e-05	0.0069	0.95	0.65	4e-11	0.33	0.0023	0.21	0.059	-0.23	0.033	-0.53	3.2e-07	-0.36	0.0009	-0.41	0.00014	-0.47	6.4e-06
ERAP2	black	-0.14	0.2	0.14	0.2	0.16	0.15	0.37	0.00062	0.29	0.0081	-0.12	0.3	-0.23	0.038	-0.23	0.037	-0.086	0.44	0.093	0.41	-0.036	0.75
IRF1	black	-0.19	0.088	0.19	0.088	0.03	0.79	0.69	5.4e-13	0.49	2.2e-06	-0.0096	0.93	-0.17	0.13	-0.42	7.6e-05	-0.29	0.0087	-0.023	0.84	-0.13	0.25
ZNF607	black	0.22	0.046	-0.22	0.046	-0.24	0.028	-0.35	0.0013	-0.32	0.003	-0.064	0.57	0.15	0.19	0.27	0.014	0.13	0.25	0.12	0.29	0.03	0.79
SLC35G1	black	0.062	0.58	-0.062	0.58	-0.12	0.27	-0.38	0.00042	-0.29	0.0086	-0.11	0.33	0.13	0.24	0.43	4.1e-05	0.33	0.0026	0.083	0.46	0.027	0.81
PARP12	black	-0.5	1.2e-06	0.5	1.2e-06	0.058	0.6	0.54	1.4e-07	0.28	0.01	0.049	0.66	-0.44	3.6e-05	-0.49	2e-06	-0.35	0.001	-0.35	0.0011	-0.46	1.5e-05
IFI44	black	-0.46	1.2e-05	0.46	1.2e-05	0.1	0.36	0.66	8e-12	0.36	0.00077	-0.043	0.7	-0.41	0.0001	-0.48	4.6e-06	-0.3	0.0062	-0.28	0.0099	-0.38	0.00038
TLCD1	black	0.089	0.43	-0.089	0.43	-0.15	0.18	-0.36	0.00091	-0.3	0.0051	0.0025	0.98	0.19	0.08	0.43	6.1e-05	0.41	0.00012	-0.057	0.61	0.05	0.66
SAMD9L	black	-0.23	0.04	0.23	0.04	0.014	0.9	0.65	3.8e-11	0.41	0.0001	0.033	0.76	-0.22	0.048	-0.5	1.4e-06	-0.3	0.0056	-0.15	0.18	-0.27	0.014
TBX6	black	0.048	0.67	-0.048	0.67	-0.079	0.48	-0.39	0.00027	-0.29	0.0074	0.065	0.56	0.27	0.013	0.37	0.00063	-0.019	0.86	-0.041	0.71	-0.0038	0.97
OASL	black	-0.37	0.00049	0.37	0.00049	-0.053	0.64	0.69	7.3e-13	0.34	0.0015	0.22	0.043	-0.21	0.056	-0.52	5.8e-07	-0.31	0.0048	-0.29	0.0069	-0.37	0.00065
PSMB10	black	-0.078	0.48	0.078	0.48	0.024	0.83	0.55	7.8e-08	0.44	2.9e-05	0.039	0.72	-0.08	0.47	-0.28	0.0093	-0.18	0.11	0.061	0.59	0.041	0.71
SLFN5	black	-0.16	0.14	0.16	0.14	0.17	0.12	0.37	0.00055	0.31	0.004	-0.14	0.21	-0.26	0.018	-0.24	0.03	-0.15	0.18	-0.014	0.9	-0.15	0.17
TMEM256	black	0.34	0.0016	-0.34	0.0016	-0.22	0.046	-0.41	0.00014	-0.35	0.0014	0.12	0.29	0.35	0.0012	0.27	0.013	0.32	0.0033	0.075	0.5	0.19	0.092
SMIM3	black	-0.089	0.43	0.089	0.43	0.095	0.39	0.38	0.00042	0.31	0.0045	0.094	0.4	-0.12	0.27	-0.3	0.0063	-0.12	0.28	-0.15	0.18	-0.11	0.31
ZBTB42	black	0.18	0.1	-0.18	0.1	-0.19	0.094	-0.34	0.0015	-0.37	0.00048	-0.0019	0.99	0.24	0.028	0.29	0.007	0.16	0.16	0.004	0.97	0.087	0.43
RPS20	black	0.011	0.92	-0.011	0.92	-0.025	0.82	-0.27	0.015	-0.28	0.012	-0.2	0.072	-0.041	0.71	0.26	0.017	0.051	0.65	0.084	0.45	0.04	0.72
ZNF529	black	0.28	0.0092	-0.28	0.0092	-0.21	0.056	-0.49	2.1e-06	-0.46	1.5e-05	-0.076	0.5	0.21	0.053	0.26	0.016	0.026	0.82	0.24	0.026	0.046	0.68
UPK1B	black	-0.071	0.52	0.071	0.52	-0.034	0.76	-0.46	9.8e-06	-0.3	0.0058	-0.065	0.56	0.2	0.064	0.56	4.6e-08	-0.019	0.86	-0.023	0.84	-0.063	0.57
WDFY1	black	-0.13	0.25	0.13	0.25	0.16	0.15	0.33	0.0021	0.33	0.0023	0.15	0.18	-0.029	0.79	-0.23	0.038	-0.13	0.26	-0.033	0.77	-0.056	0.62
DHX58	black	-0.11	0.34	0.11	0.34	0.033	0.77	0.45	2.1e-05	0.29	0.0074	0.047	0.67	-0.062	0.58	-0.12	0.28	-0.061	0.59	-0.03	0.79	0.029	0.79
IL7	black	0.063	0.57	-0.063	0.57	0.015	0.89	0.32	0.0027	0.32	0.0033	0.077	0.49	0.13	0.25	-0.12	0.27	0.1	0.36	0.08	0.47	0.062	0.58
GFI1	black	-0.23	0.039	0.23	0.039	0.087	0.44	0.52	3.6e-07	0.4	0.0002	-0.034	0.76	-0.2	0.076	-0.27	0.014	-0.17	0.12	-0.11	0.34	-0.16	0.16
CCNJL	black	-0.12	0.28	0.12	0.28	-0.035	0.75	0.46	1.1e-05	0.18	0.097	0.043	0.7	-0.17	0.14	-0.42	9.3e-05	-0.16	0.14	-0.12	0.27	-0.077	0.49
GBP1	black	-0.23	0.033	0.23	0.033	-0.0062	0.96	0.74	9.4e-16	0.43	4.4e-05	0.14	0.2	-0.2	0.065	-0.5	1.3e-06	-0.18	0.11	-0.15	0.18	-0.3	0.0066
ETV7	black	-0.051	0.65	0.051	0.65	0.002	0.99	0.63	1.6e-10	0.44	2.7e-05	-0.093	0.4	-0.19	0.085	-0.32	0.0034	-0.12	0.29	-0.015	0.9	-0.09	0.42
TLR3	black	0.094	0.4	-0.094	0.4	-0.062	0.58	0.44	3.6e-05	0.28	0.0092	0.024	0.83	0.12	0.3	-0.28	0.01	-0.088	0.43	0.11	0.33	0.079	0.48
CASP1	black	-0.098	0.38	0.098	0.38	-0.028	0.8	0.45	2.4e-05	0.17	0.13	0.062	0.58	-0.23	0.041	-0.39	0.00029	-0.053	0.63	-0.11	0.32	-0.12	0.3
TPPP	black	0.17	0.12	-0.17	0.12	-0.19	0.08	-0.34	0.0016	-0.32	0.0032	0.013	0.91	0.34	0.0019	0.22	0.044	0.081	0.47	0.091	0.42	0.12	0.29
JAK2	black	0.05	0.66	-0.05	0.66	0.021	0.85	0.46	1.5e-05	0.36	0.00095	0.21	0.062	0.099	0.38	-0.26	0.016	-0.049	0.66	0.019	0.86	-0.049	0.66
TMEM209	black	-0.052	0.64	0.052	0.64	0.12	0.29	0.3	0.0057	0.28	0.0099	-0.044	0.69	-0.15	0.16	-0.16	0.14	-0.039	0.73	-0.053	0.64	0.029	0.8
IFI27	black	-0.56	3.1e-08	0.56	3.1e-08	0.043	0.7	0.61	1.4e-09	0.31	0.0044	0.19	0.083	-0.37	0.00051	-0.44	2.6e-05	-0.3	0.0062	-0.37	0.00048	-0.46	1.4e-05
IKZF3	black	-0.15	0.17	0.15	0.17	-9.2e-05	1	0.41	0.00011	0.38	0.00046	0.027	0.81	0.061	0.58	-0.13	0.24	-0.078	0.49	-0.15	0.19	-0.0097	0.93
BATF2	black	-0.13	0.25	0.13	0.25	-0.0046	0.97	0.75	6.7e-16	0.51	6.5e-07	-0.04	0.72	-0.3	0.0059	-0.43	5.2e-05	-0.22	0.05	-0.088	0.43	-0.0073	0.95
FKBP15	black	-0.12	0.29	0.12	0.29	0.085	0.44	0.31	0.0041	0.29	0.009	0.17	0.12	-0.042	0.71	-0.26	0.02	-0.081	0.46	-0.036	0.75	-0.13	0.25
TMEM229B	black	-0.21	0.055	0.21	0.055	0.089	0.43	0.62	2.9e-10	0.4	0.00016	-0.11	0.31	-0.37	0.00064	-0.43	6e-05	0.0043	0.97	-0.13	0.23	-0.096	0.39
NKG7	black	-0.092	0.41	0.092	0.41	0.15	0.18	0.68	1.6e-12	0.66	9.7e-12	-0.051	0.65	-0.2	0.071	-0.45	2.2e-05	-0.21	0.06	-0.098	0.38	-0.0032	0.98
CHP2	black	-0.022	0.84	0.022	0.84	-0.093	0.41	-0.34	0.0014	-0.33	0.0023	0.14	0.2	0.23	0.038	0.37	0.00059	0.28	0.0097	-0.13	0.24	0.033	0.77
STOM	black	0.0029	0.98	-0.0029	0.98	-0.018	0.87	0.32	0.0029	0.2	0.075	0.096	0.39	0.038	0.74	-0.14	0.2	-0.05	0.65	0.021	0.85	-0.039	0.73
CNP	black	-0.0087	0.94	0.0087	0.94	0.0076	0.95	0.32	0.0028	0.2	0.073	0.061	0.59	0.022	0.85	-0.15	0.18	0.25	0.025	-0.013	0.91	0.026	0.82
ERAP1	black	-0.18	0.1	0.18	0.1	0.088	0.43	0.51	9.6e-07	0.39	0.0003	0.12	0.27	-0.13	0.22	-0.3	0.0057	-0.09	0.42	-0.12	0.3	-0.16	0.15
HLA-C	black	-0.33	0.0023	0.33	0.0023	0.15	0.19	0.57	1.8e-08	0.39	0.00024	-0.013	0.91	-0.31	0.0042	-0.48	4.3e-06	-0.19	0.088	-0.2	0.071	-0.22	0.048
DNM1	black	-0.25	0.021	0.25	0.021	0.31	0.0043	-0.4	0.0002	-0.16	0.15	-0.21	0.055	-0.17	0.13	0.3	0.0052	-0.066	0.55	0.094	0.4	-0.093	0.4
SMCR8	black	-0.12	0.27	0.12	0.27	0.22	0.05	0.34	0.0015	0.28	0.011	0.046	0.68	-0.14	0.19	-0.22	0.045	0.041	0.71	-0.03	0.79	-0.1	0.37
APOL2	black	-0.11	0.33	0.11	0.33	-0.022	0.84	0.48	5.7e-06	0.36	0.00078	0.074	0.5	-0.086	0.44	-0.25	0.025	-0.064	0.56	-0.13	0.24	-0.11	0.31
FAM111A	black	-0.35	0.0012	0.35	0.0012	-0.074	0.51	0.49	2.4e-06	0.33	0.0024	-0.24	0.028	-0.26	0.016	-0.33	0.0021	-0.2	0.072	-0.27	0.015	-0.3	0.0062
TLR2	black	-0.097	0.39	0.097	0.39	0.062	0.58	0.4	0.00017	0.33	0.0027	-0.016	0.89	-0.17	0.13	-0.24	0.03	-0.087	0.43	-0.19	0.084	-0.036	0.74
UBA7	black	-0.034	0.76	0.034	0.76	-0.042	0.71	0.54	1.1e-07	0.32	0.0035	0.1	0.35	0.022	0.84	-0.35	0.001	-0.15	0.16	-0.19	0.093	-0.0081	0.94
ZNF316	black	0.091	0.41	-0.091	0.41	-0.087	0.43	-0.34	0.0016	-0.24	0.027	-0.088	0.43	0.13	0.25	0.27	0.015	0.17	0.12	-0.085	0.45	0.061	0.58
PARP9	black	-0.3	0.006	0.3	0.006	0.11	0.33	0.63	2.2e-10	0.43	5.4e-05	0.057	0.61	-0.12	0.28	-0.39	0.00029	-0.29	0.0081	-0.16	0.14	-0.18	0.1
IL12RB1	black	-0.25	0.023	0.25	0.023	0.17	0.13	0.64	5.4e-11	0.61	1.3e-09	-0.031	0.78	-0.26	0.016	-0.34	0.0016	-0.14	0.22	-0.15	0.18	-0.15	0.18
FBXL3	black	0.19	0.086	-0.19	0.086	-0.06	0.59	-0.36	0.0007	-0.26	0.016	0.025	0.82	0.19	0.087	0.22	0.041	0.088	0.43	0.086	0.44	0.026	0.81
CRLF1	black	0.01	0.93	-0.01	0.93	0.067	0.55	-0.32	0.0034	-0.26	0.016	0.059	0.6	0.037	0.74	0.15	0.16	0.21	0.058	-0.0084	0.94	0.026	0.81
SECTM1	black	-0.012	0.91	0.012	0.91	-0.1	0.35	0.43	5.8e-05	0.36	0.00085	0.12	0.27	0.18	0.1	-0.24	0.031	0.013	0.9	-0.15	0.18	0.015	0.89
OAS1	black	-0.26	0.016	0.26	0.016	-0.13	0.23	0.58	6.8e-09	0.3	0.006	0.25	0.023	-0.099	0.37	-0.5	1.9e-06	-0.18	0.11	-0.38	0.00042	-0.38	0.00047
HSD11B1L	black	-0.002	0.99	0.002	0.99	0.022	0.84	-0.5	1.7e-06	-0.29	0.0074	-0.13	0.23	0.084	0.45	0.48	3.5e-06	0.11	0.32	0.1	0.35	0.083	0.46
MLF1	black	-0.076	0.5	0.076	0.5	0.043	0.7	-0.57	1.8e-08	-0.47	7.3e-06	-0.21	0.054	0.031	0.78	0.52	6e-07	0.035	0.75	0.12	0.3	-0.021	0.85
WARS1	black	-0.31	0.0039	0.31	0.0039	-0.041	0.71	0.68	2.6e-12	0.47	7e-06	0.22	0.05	-0.2	0.07	-0.4	0.00015	-0.26	0.018	-0.32	0.0036	-0.33	0.0024
IFI6	black	-0.4	0.00015	0.4	0.00015	0.22	0.045	0.57	1.5e-08	0.41	0.00013	-0.058	0.6	-0.44	2.5e-05	-0.35	0.0013	-0.25	0.021	-0.16	0.15	-0.25	0.024
EML6	black	0.021	0.85	-0.021	0.85	0.015	0.89	-0.34	0.0017	-0.29	0.0079	0.034	0.76	0.093	0.4	0.2	0.068	0.12	0.3	-0.0055	0.96	-0.03	0.79
ENTPD2	black	0.16	0.16	-0.16	0.16	-0.0011	0.99	-0.39	0.00025	-0.29	0.0088	0.14	0.2	0.19	0.081	0.29	0.0076	0.32	0.0028	-0.06	0.59	0.13	0.24
RNF165	black	0.17	0.12	-0.17	0.12	-0.12	0.27	-0.4	0.00017	-0.22	0.041	-0.041	0.71	0.25	0.021	0.45	2.4e-05	0.059	0.6	0.087	0.43	0.084	0.45
NDN	black	0.31	0.0041	-0.31	0.0041	0.07	0.53	-0.57	1.4e-08	-0.27	0.013	-0.11	0.32	0.28	0.011	0.54	1.1e-07	0.25	0.02	0.4	0.00016	0.31	0.004
CCL5	black	-0.25	0.024	0.25	0.024	0.22	0.048	0.69	7.4e-13	0.67	3e-12	-0.17	0.13	-0.34	0.0016	-0.35	0.0013	-0.21	0.055	-0.11	0.32	-0.15	0.19
APOL4	black	-0.13	0.24	0.13	0.24	0.055	0.62	0.45	2.3e-05	0.36	0.00098	0.097	0.38	0.043	0.7	-0.13	0.24	-0.11	0.31	0.0091	0.93	-0.058	0.6
GBP5	black	-0.33	0.0022	0.33	0.0022	0.062	0.58	0.79	4.5e-19	0.65	3e-11	0.088	0.43	-0.31	0.004	-0.47	5.8e-06	-0.26	0.018	-0.28	0.0096	-0.32	0.0031
CCDC91	black	0.0044	0.97	-0.0044	0.97	-0.03	0.79	-0.31	0.0038	-0.24	0.027	-0.087	0.43	-0.044	0.7	0.17	0.12	0.051	0.65	-0.08	0.47	-0.12	0.28
RPAIN	black	0.31	0.0047	-0.31	0.0047	-0.16	0.15	-0.33	0.0023	-0.34	0.0016	0.064	0.57	0.29	0.0083	0.29	0.0081	0.22	0.043	0.11	0.33	0.064	0.56
CD7	black	-0.3	0.0051	0.3	0.0051	0.12	0.28	0.59	3.2e-09	0.54	1.1e-07	-0.0072	0.95	-0.15	0.17	-0.25	0.024	-0.064	0.57	-0.14	0.21	-0.14	0.21
BTN3A3	black	-0.2	0.075	0.2	0.075	0.25	0.024	0.44	3.5e-05	0.4	0.00018	-0.096	0.39	-0.29	0.0071	-0.28	0.01	0.045	0.69	0.023	0.83	-0.078	0.48
IFITM1	black	-0.24	0.031	0.24	0.031	0.02	0.86	0.56	3.2e-08	0.34	0.0018	0.13	0.26	-0.21	0.062	-0.34	0.0019	-0.15	0.16	-0.17	0.12	-0.32	0.0036
ATP5MC3	black	0.028	0.8	-0.028	0.8	-0.13	0.24	-0.31	0.0049	-0.24	0.029	-0.033	0.77	0.25	0.023	0.38	0.00035	0.1	0.37	-0.031	0.78	-0.033	0.77
METRN	black	-0.014	0.9	0.014	0.9	-0.087	0.44	-0.6	1.6e-09	-0.5	1.7e-06	-0.077	0.49	-0.046	0.68	0.4	0.00019	0.21	0.058	-0.041	0.71	0.02	0.86
USP18	black	-0.42	7.4e-05	0.42	7.4e-05	0.11	0.32	0.53	2.4e-07	0.34	0.0015	-0.065	0.56	-0.27	0.013	-0.23	0.033	-0.25	0.021	-0.23	0.037	-0.37	0.00054
CIART	black	0.068	0.54	-0.068	0.54	-0.086	0.44	-0.37	0.00048	-0.29	0.0074	0.034	0.76	0.32	0.0033	0.47	7.5e-06	0.18	0.11	0.069	0.53	0.16	0.15
RPL23	black	0.24	0.03	-0.24	0.03	-0.17	0.12	-0.46	1.5e-05	-0.31	0.0041	-0.067	0.55	0.2	0.065	0.39	0.00032	0.29	0.0088	0.017	0.88	0.2	0.076
PLB1	black	-0.062	0.58	0.062	0.58	0.1	0.37	-0.33	0.0023	-0.19	0.091	-0.047	0.67	0.06	0.59	0.32	0.0032	0.23	0.04	-0.014	0.9	0.061	0.58
APOBEC3D	black	-0.23	0.039	0.23	0.039	0.17	0.12	0.47	8.5e-06	0.43	4.3e-05	-0.26	0.015	-0.31	0.0044	-0.18	0.1	-0.14	0.21	-0.052	0.64	-0.14	0.2
GCSH	black	0.048	0.67	-0.048	0.67	-0.014	0.9	-0.36	0.00072	-0.21	0.055	-0.02	0.86	0.15	0.19	0.37	0.00053	0.12	0.28	0.11	0.33	0.08	0.47
ZNF513	black	0.13	0.25	-0.13	0.25	-0.042	0.7	-0.31	0.005	-0.25	0.023	0.1	0.36	0.17	0.13	0.24	0.032	0.026	0.81	0.0022	0.98	-0.025	0.82
RPS5	black	0.14	0.22	-0.14	0.22	-0.13	0.24	-0.45	2e-05	-0.33	0.0026	0.094	0.4	0.27	0.015	0.28	0.009	-0.0059	0.96	0.083	0.46	0.11	0.31
ZNF614	black	0.057	0.61	-0.057	0.61	-0.088	0.43	-0.36	0.00079	-0.27	0.012	-0.12	0.29	0.19	0.09	0.36	0.00092	0.019	0.87	0.077	0.49	-0.027	0.81
DYNC2LI1	black	0.15	0.18	-0.15	0.18	-0.11	0.32	-0.39	0.00026	-0.32	0.0032	0.12	0.27	0.31	0.0049	0.27	0.012	0.1	0.37	-0.03	0.79	0.11	0.33
RPL41	black	0.12	0.28	-0.12	0.28	-0.25	0.022	-0.3	0.0058	-0.26	0.017	0.075	0.5	0.23	0.041	0.14	0.2	-0.0048	0.97	-0.054	0.63	0.042	0.7
BZW2	black	0.15	0.17	-0.15	0.17	-0.15	0.18	-0.36	0.00079	-0.29	0.0089	0.082	0.46	0.24	0.029	0.27	0.013	0.013	0.9	0.09	0.42	-0.028	0.8
PHETA2	black	0.14	0.21	-0.14	0.21	0.0071	0.95	-0.32	0.0034	-0.29	0.0087	0.0036	0.97	0.043	0.7	0.18	0.094	0.0062	0.96	0.067	0.55	0.04	0.72
PGAP4	black	-0.088	0.43	0.088	0.43	-0.058	0.6	-0.43	4.1e-05	-0.4	0.00016	0.15	0.18	0.25	0.021	0.35	0.0012	-0.022	0.84	-0.029	0.8	-0.16	0.15
ZBP1	black	-0.083	0.45	0.083	0.45	-0.086	0.44	0.66	9.7e-12	0.56	3e-08	0.074	0.51	-0.081	0.47	-0.27	0.013	-0.17	0.13	-0.19	0.082	-0.039	0.73
PRR7	black	0.09	0.42	-0.09	0.42	-0.14	0.19	-0.33	0.0024	-0.21	0.062	0.078	0.49	0.088	0.43	0.22	0.047	0.026	0.82	-0.046	0.68	-0.013	0.9
HELZ2	black	-0.36	0.00087	0.36	0.00087	0.037	0.74	0.47	8.1e-06	0.26	0.018	0.12	0.3	-0.28	0.0092	-0.48	3.4e-06	-0.28	0.009	-0.36	0.00073	-0.42	9e-05
FAS	black	-0.068	0.54	0.068	0.54	0.14	0.22	0.5	1.2e-06	0.39	0.00032	0.075	0.5	-0.21	0.056	-0.44	3e-05	-0.1	0.36	-0.17	0.12	-0.21	0.062
DYNLT1	black	-0.078	0.48	0.078	0.48	-0.0024	0.98	0.27	0.014	0.27	0.015	-0.2	0.067	-0.11	0.33	0.025	0.82	-0.15	0.16	0.025	0.82	-0.042	0.7
CFB	black	0.0093	0.93	-0.0093	0.93	0.00091	0.99	0.52	6e-07	0.48	3.9e-06	0.038	0.73	0.031	0.78	-0.19	0.09	-0.096	0.39	-0.12	0.27	0.26	0.018
TRIM21	black	-0.11	0.32	0.11	0.32	-0.048	0.67	0.51	8.5e-07	0.25	0.022	-0.051	0.65	-0.26	0.02	-0.45	2.3e-05	-0.22	0.041	-0.14	0.2	-0.17	0.12
GNLY	black	-0.29	0.0077	0.29	0.0077	0.073	0.51	0.64	8.1e-11	0.46	1.4e-05	-0.12	0.28	-0.35	0.0013	-0.42	6.7e-05	-0.25	0.025	-0.078	0.48	-0.23	0.04
IDO1	black	-0.28	0.012	0.28	0.012	0.097	0.38	0.76	4.9e-17	0.66	1.3e-11	-0.026	0.81	-0.26	0.02	-0.42	8.3e-05	-0.23	0.034	-0.16	0.15	-0.21	0.052
BTN3A2	black	-0.11	0.3	0.11	0.3	0.096	0.39	0.3	0.0057	0.23	0.038	-0.11	0.31	-0.14	0.21	-0.16	0.15	-0.1	0.35	-0.064	0.56	-0.056	0.62
CXCL10	black	-0.24	0.026	0.24	0.026	0.026	0.82	0.85	3.7e-24	0.58	1.3e-08	-0.017	0.88	-0.31	0.005	-0.51	1e-06	-0.29	0.0078	-0.13	0.24	-0.24	0.03
ISG20	black	-0.23	0.035	0.23	0.035	-0.11	0.3	0.57	2e-08	0.38	0.00035	0.047	0.68	-0.094	0.4	-0.36	0.00084	-0.23	0.037	-0.3	0.006	-0.25	0.02
DDX60	black	-0.41	0.0001	0.41	0.0001	0.19	0.093	0.73	5.5e-15	0.48	3.5e-06	-0.015	0.89	-0.39	0.00023	-0.47	7.2e-06	-0.3	0.0055	-0.13	0.23	-0.32	0.003
GLUD1	black	-0.025	0.82	0.025	0.82	-0.14	0.21	-0.35	0.0012	-0.27	0.012	-0.058	0.6	0.14	0.22	0.32	0.0034	0.21	0.052	-0.11	0.33	-0.07	0.53
C17orf100	black	0.13	0.24	-0.13	0.24	-0.067	0.55	-0.36	0.00074	-0.3	0.0055	-0.12	0.28	0.26	0.017	0.44	3.9e-05	0.063	0.57	0.093	0.4	0.11	0.32
SEPTIN6	black	-0.052	0.64	0.052	0.64	0.037	0.74	0.29	0.0074	0.26	0.02	-0.069	0.53	-0.12	0.27	-0.11	0.31	0.044	0.69	-0.034	0.76	0.013	0.9
GPX2	black	-0.052	0.64	0.052	0.64	-0.19	0.08	-0.47	6.6e-06	-0.39	0.00027	0.013	0.91	0.32	0.0031	0.47	6.8e-06	-0.0057	0.96	-0.17	0.12	-0.096	0.39
SLC7A4	black	0.19	0.094	-0.19	0.094	-0.21	0.056	-0.39	0.00029	-0.34	0.0016	0.073	0.51	0.23	0.039	0.3	0.0063	0.26	0.018	0.0097	0.93	0.05	0.66
DDX58	black	-0.18	0.11	0.18	0.11	-0.0061	0.96	0.58	7.4e-09	0.34	0.0019	-0.12	0.27	-0.32	0.0028	-0.41	0.00012	-0.1	0.37	-0.081	0.47	-0.25	0.024
SLAMF7	black	-0.15	0.17	0.15	0.17	0.23	0.034	0.49	2.2e-06	0.54	1e-07	0.04	0.72	-0.14	0.2	-0.3	0.0052	-0.21	0.06	-0.12	0.29	-0.045	0.69
GLIPR1	black	-0.25	0.025	0.25	0.025	0.17	0.11	0.4	0.00016	0.35	0.0013	-0.1	0.37	-0.31	0.0038	-0.34	0.002	-0.17	0.12	-0.13	0.25	-0.15	0.17
BRWD1	black	0.048	0.67	-0.048	0.67	-0.14	0.19	-0.33	0.002	-0.22	0.043	-0.042	0.71	0.22	0.042	0.3	0.0056	0.061	0.59	0.02	0.86	0.036	0.74
CAMKMT	black	0.011	0.92	-0.011	0.92	-0.17	0.12	-0.37	0.0005	-0.33	0.0022	0.012	0.91	0.18	0.11	0.23	0.036	0.19	0.084	-0.097	0.39	-0.083	0.46
PTH2R	black	-0.032	0.77	0.032	0.77	-0.12	0.29	-0.49	3.2e-06	-0.38	0.00043	-0.27	0.013	0.082	0.46	0.58	1.1e-08	0.04	0.72	-0.029	0.8	0.097	0.38
CD55	black	0.12	0.27	-0.12	0.27	-0.11	0.34	-0.37	0.00058	-0.27	0.015	0.097	0.38	0.31	0.0046	0.2	0.073	-0.0017	0.99	0.052	0.64	0.01	0.93
HERC6	black	-0.21	0.052	0.21	0.052	-0.2	0.064	0.58	1.2e-08	0.3	0.006	0.2	0.066	0.028	0.8	-0.36	0.00071	-0.21	0.052	-0.32	0.0033	-0.26	0.016
STAT1	black	-0.35	0.001	0.35	0.001	0.072	0.52	0.55	5.9e-08	0.35	0.0012	0.11	0.33	-0.19	0.092	-0.29	0.009	-0.14	0.19	-0.2	0.072	-0.34	0.0017
TNF	black	-0.11	0.32	0.11	0.32	-0.038	0.73	0.31	0.0038	0.33	0.002	0.035	0.75	-0.065	0.56	-0.14	0.22	-0.12	0.3	-0.1	0.35	-0.045	0.68
AIM2	black	-0.47	9.5e-06	0.47	9.5e-06	-0.067	0.55	0.75	2e-16	0.38	0.00043	0.082	0.46	-0.38	0.00045	-0.55	8.4e-08	-0.35	0.0013	-0.39	0.00032	-0.46	1.5e-05
PLAG1	black	-0.078	0.48	0.078	0.48	-0.053	0.63	-0.29	0.0071	-0.31	0.004	-0.13	0.25	0.077	0.49	0.39	0.00029	0.096	0.39	-0.016	0.88	0.029	0.79
TRANK1	black	-0.17	0.14	0.17	0.14	0.15	0.17	0.58	9.2e-09	0.44	2.9e-05	-0.032	0.78	-0.17	0.12	-0.35	0.0013	-0.028	0.8	-0.068	0.54	-0.1	0.36
HLA-E	black	0.037	0.74	-0.037	0.74	-0.067	0.55	0.43	5.2e-05	0.31	0.0041	0.012	0.91	-0.039	0.72	-0.32	0.0033	-0.017	0.88	-0.1	0.37	-0.011	0.92
MCCC1	black	0.0069	0.95	-0.0069	0.95	-0.066	0.55	-0.34	0.0019	-0.2	0.076	-0.11	0.32	0.21	0.054	0.47	6.2e-06	0.15	0.18	0.056	0.62	0.054	0.63
FOXP3	black	-0.28	0.012	0.28	0.012	0.03	0.79	0.6	2.9e-09	0.47	8.9e-06	0.2	0.068	-0.053	0.63	-0.28	0.0099	-0.12	0.29	-0.27	0.015	-0.18	0.11
LCK	black	-0.11	0.32	0.11	0.32	0.061	0.58	0.39	0.00026	0.39	0.00023	0.046	0.68	-0.045	0.69	-0.21	0.052	-0.13	0.24	-0.13	0.24	-0.1	0.35
ZNF320	black	0.091	0.41	-0.091	0.41	-0.099	0.37	-0.33	0.0021	-0.25	0.024	-0.13	0.25	0.15	0.17	0.3	0.0066	0.18	0.11	0.065	0.56	0.047	0.67
FGF7	blue	0.37	0.00048	-0.37	0.00048	0.43	5.6e-05	-0.19	0.083	0.16	0.15	-0.27	0.013	0.037	0.74	0.23	0.038	0.23	0.037	0.61	1.1e-09	0.54	1.9e-07
TFG	blue	-0.21	0.056	0.21	0.056	-0.2	0.074	0.092	0.41	-0.058	0.6	0.12	0.29	0.01	0.93	-0.12	0.29	-0.2	0.067	-0.31	0.0045	-0.27	0.014
PTGIS	blue	0.25	0.024	-0.25	0.024	0.53	2.7e-07	-0.059	0.6	0.29	0.0082	-0.31	0.0039	-0.075	0.5	0.28	0.011	0.23	0.033	0.72	2.1e-14	0.5	1.4e-06
ELF2	blue	-0.063	0.57	0.063	0.57	-0.096	0.39	0.13	0.23	-0.053	0.64	-0.055	0.62	0.011	0.92	0.016	0.89	-0.066	0.55	-0.12	0.3	0.042	0.7
REXO5	blue	-0.14	0.2	0.14	0.2	-0.16	0.16	-0.01	0.93	-0.058	0.6	-0.15	0.18	-0.017	0.88	0.13	0.25	-0.097	0.38	-0.16	0.16	-0.096	0.39
LSM10	blue	-0.086	0.44	0.086	0.44	-0.042	0.7	0.037	0.74	-0.019	0.87	-0.1	0.37	-0.12	0.27	0.083	0.46	-0.12	0.28	0.11	0.31	-0.039	0.73
THOC6	blue	-0.0079	0.94	0.0079	0.94	-0.19	0.084	-0.13	0.23	-0.2	0.069	-0.052	0.64	0.076	0.5	0.065	0.56	-0.18	0.11	-0.13	0.23	-0.038	0.74
FN3KRP	blue	-0.28	0.0093	0.28	0.0093	-0.16	0.15	0.16	0.14	-0.052	0.64	-0.13	0.23	-0.15	0.16	-0.069	0.54	-0.22	0.048	-0.23	0.036	-0.18	0.1
PHF5A	blue	-0.18	0.098	0.18	0.098	-0.26	0.018	0.029	0.79	-0.22	0.047	-0.13	0.24	-0.11	0.34	-0.036	0.74	-0.13	0.26	-0.23	0.039	-0.22	0.045
PIGA	blue	-0.054	0.62	0.054	0.62	-0.11	0.34	0.0015	0.99	-0.063	0.57	0.13	0.24	0.14	0.22	0.02	0.86	-0.023	0.84	-0.22	0.05	-0.097	0.39
PNPLA6	blue	-0.16	0.14	0.16	0.14	-0.17	0.13	0.11	0.34	0.015	0.89	0.055	0.62	-0.096	0.39	-0.15	0.17	-0.15	0.19	-0.24	0.029	-0.18	0.1
IMPAD1	blue	-0.051	0.65	0.051	0.65	0.23	0.038	-0.15	0.17	0.044	0.69	-0.27	0.012	-0.18	0.097	0.19	0.089	-0.11	0.34	0.2	0.065	0.16	0.15
CCDC58	blue	0.047	0.67	-0.047	0.67	-0.35	0.001	-0.33	0.0024	-0.38	0.00034	-0.15	0.17	0.2	0.064	0.37	0.00068	-0.11	0.32	-0.18	0.1	0.0055	0.96
FAT4	blue	0.1	0.35	-0.1	0.35	0.49	3.3e-06	-0.039	0.73	0.3	0.0055	-0.24	0.031	-0.075	0.5	0.22	0.043	0.047	0.67	0.43	4.9e-05	0.28	0.011
LNX2	blue	0.088	0.43	-0.088	0.43	-0.26	0.016	-0.035	0.75	-0.17	0.13	0.1	0.37	0.15	0.17	-0.071	0.52	-0.11	0.31	-0.14	0.22	-0.028	0.8
NANS	blue	-0.047	0.67	0.047	0.67	-0.29	0.008	-0.11	0.32	-0.15	0.18	-0.11	0.31	-0.022	0.85	0.076	0.5	-0.039	0.73	-0.23	0.038	-0.13	0.26
MED26	blue	-0.14	0.22	0.14	0.22	-0.13	0.26	-0.042	0.71	-0.19	0.083	-0.24	0.027	-0.076	0.49	0.091	0.41	-0.038	0.73	-0.17	0.13	-0.018	0.87
C21orf91	blue	-0.0035	0.97	0.0035	0.97	-0.23	0.04	0.13	0.22	-0.12	0.29	0.018	0.87	0.024	0.83	-0.23	0.034	-0.049	0.66	-0.16	0.15	-0.095	0.39
ARL6IP4	blue	0.0028	0.98	-0.0028	0.98	-0.26	0.017	-0.13	0.25	-0.23	0.037	-0.12	0.27	0.0033	0.98	0.044	0.69	-0.082	0.46	-0.19	0.081	-0.024	0.83
BMP2K	blue	-0.21	0.058	0.21	0.058	0.24	0.032	0.24	0.031	0.29	0.0068	0.16	0.16	-0.2	0.067	-0.28	0.011	-0.11	0.34	-0.15	0.17	-0.12	0.26
STRADA	blue	-0.17	0.13	0.17	0.13	-0.18	0.098	0.034	0.76	-0.14	0.21	-0.1	0.37	-0.069	0.53	-0.043	0.7	-0.1	0.35	-0.19	0.09	-0.17	0.12
UBE2QL1	blue	0.21	0.059	-0.21	0.059	0.51	7e-07	-0.061	0.59	0.19	0.086	-0.24	0.028	-0.18	0.11	0.044	0.7	0.26	0.016	0.51	6.5e-07	0.36	0.0007
GALNT3	blue	-0.2	0.074	0.2	0.074	-0.2	0.07	-0.088	0.43	-0.24	0.028	0.054	0.63	-0.015	0.9	0.062	0.58	-0.2	0.068	-0.29	0.007	-0.15	0.18
CIZ1	blue	-0.19	0.08	0.19	0.08	-0.02	0.86	0.037	0.74	0.0013	0.99	-0.1	0.37	-0.2	0.077	-0.027	0.81	0.048	0.67	-0.14	0.2	-0.13	0.24
EPN2	blue	-0.1	0.37	0.1	0.37	-0.19	0.088	-0.13	0.24	-0.26	0.016	0.04	0.72	0.094	0.4	0.13	0.26	-0.14	0.19	-0.18	0.097	-0.14	0.19
ROR2	blue	-0.36	0.00095	0.36	0.00095	0.38	0.00044	0.2	0.069	0.21	0.062	-0.19	0.083	-0.31	0.0045	0.11	0.34	-0.1	0.37	-0.1	0.36	-0.16	0.15
IFNGR1	blue	-0.067	0.55	0.067	0.55	-0.097	0.38	0.17	0.11	0.069	0.53	0.09	0.42	-0.027	0.81	-0.19	0.093	-0.17	0.12	-0.25	0.021	-0.1	0.37
BUD13	blue	-0.079	0.48	0.079	0.48	-0.16	0.14	-0.06	0.59	-0.092	0.41	-0.23	0.039	-0.042	0.71	0.07	0.53	-0.11	0.31	-0.17	0.13	-0.088	0.43
ZNF653	blue	0.056	0.62	-0.056	0.62	-0.28	0.0091	0.033	0.77	-0.094	0.4	-0.15	0.18	-0.042	0.71	0.057	0.61	-0.11	0.33	-0.18	0.11	0.057	0.61
TSTA3	blue	-0.0067	0.95	0.0067	0.95	-0.32	0.0032	-0.045	0.68	-0.14	0.19	0.062	0.58	0.017	0.88	0.051	0.65	0.063	0.57	-0.3	0.0063	-0.13	0.26
CRAMP1	blue	-0.0084	0.94	0.0084	0.94	-0.18	0.096	-0.02	0.86	-0.068	0.54	-0.081	0.47	0.048	0.67	0.057	0.61	-0.058	0.6	-0.17	0.13	0.048	0.66
MGST2	blue	0.18	0.1	-0.18	0.1	-0.32	0.0028	-0.14	0.21	-0.16	0.14	-0.02	0.86	0.27	0.015	0.14	0.22	0.048	0.67	-0.19	0.092	0.079	0.48
SLC25A38	blue	-0.058	0.6	0.058	0.6	-0.19	0.09	0.1	0.37	-0.011	0.92	-0.2	0.072	0.049	0.66	0.053	0.63	-0.094	0.4	-0.16	0.15	-0.016	0.88
ZBTB17	blue	-0.18	0.1	0.18	0.1	-0.21	0.051	0.3	0.0058	0.062	0.58	0.18	0.11	-0.1	0.35	-0.32	0.0036	-0.21	0.062	-0.25	0.024	-0.22	0.043
CA2	blue	-0.22	0.041	0.22	0.041	-0.085	0.45	0.32	0.0028	0.12	0.3	0.18	0.11	-0.27	0.015	-0.45	2.2e-05	-0.14	0.2	-0.34	0.0015	-0.31	0.0042
RNF20	blue	0.029	0.8	-0.029	0.8	-0.094	0.4	-0.098	0.38	-0.17	0.12	-0.24	0.03	-0.031	0.78	0.1	0.35	-0.025	0.82	0.14	0.21	0.056	0.62
DDX11	blue	-0.24	0.026	0.24	0.026	-0.21	0.063	0.33	0.0024	0.14	0.21	-0.21	0.056	-0.22	0.047	-0.02	0.86	-0.16	0.15	-0.35	0.0014	-0.079	0.48
KLF2	blue	0.34	0.0015	-0.34	0.0015	0.17	0.11	-0.064	0.56	0.22	0.047	-0.13	0.25	0.18	0.11	0.16	0.16	0.18	0.11	0.45	2.4e-05	0.43	5.6e-05
INTS2	blue	-0.099	0.37	0.099	0.37	-0.23	0.033	0.15	0.19	-0.022	0.84	-0.0017	0.99	-0.043	0.7	-0.15	0.18	-0.12	0.27	-0.27	0.013	-0.15	0.19
LDB1	blue	-0.13	0.23	0.13	0.23	-0.14	0.2	0.17	0.12	0.01	0.93	0.065	0.56	-0.11	0.34	-0.22	0.049	-0.068	0.54	-0.31	0.0038	-0.1	0.37
CCDC137	blue	-0.23	0.037	0.23	0.037	-0.23	0.04	0.15	0.17	0.042	0.71	-0.14	0.21	-0.18	0.1	0.015	0.9	-0.14	0.2	-0.25	0.024	-0.16	0.15
DCLK1	blue	0.19	0.077	-0.19	0.077	0.54	1.4e-07	-0.12	0.3	0.2	0.071	-0.24	0.03	-0.05	0.65	0.18	0.1	0.13	0.24	0.68	1.2e-12	0.31	0.0044
GMEB2	blue	-0.2	0.068	0.2	0.068	-0.11	0.31	0.096	0.39	-0.027	0.81	-0.17	0.12	-0.1	0.35	0.023	0.84	-0.17	0.12	-0.15	0.17	-0.14	0.22
CTNNA3	blue	0.33	0.0023	-0.33	0.0023	0.19	0.08	-0.14	0.21	-0.02	0.86	-0.21	0.051	-0.0095	0.93	0.12	0.3	0.03	0.79	0.88	4.7e-28	0.33	0.0027
SOBP	blue	0.34	0.0017	-0.34	0.0017	0.39	0.00023	-0.2	0.067	0.11	0.3	-0.47	6.4e-06	-0.074	0.51	0.28	0.011	0.14	0.22	0.69	7.5e-13	0.6	1.6e-09
SETD2	blue	-0.15	0.17	0.15	0.17	-0.078	0.48	0.11	0.32	0.032	0.78	-0.1	0.35	-0.056	0.61	0.021	0.85	-0.13	0.23	-0.12	0.27	-0.09	0.42
ATG13	blue	-0.21	0.057	0.21	0.057	-0.14	0.19	0.047	0.67	-0.14	0.22	-0.15	0.16	-0.25	0.022	0.033	0.77	-0.069	0.53	-0.29	0.0072	-0.14	0.22
SYNC	blue	0.17	0.12	-0.17	0.12	0.28	0.01	-0.023	0.83	0.099	0.37	-0.26	0.019	-0.16	0.14	0.049	0.66	-0.044	0.69	0.67	3.1e-12	0.31	0.0037
LRRC59	blue	-0.15	0.19	0.15	0.19	-0.2	0.074	0.073	0.51	-0.14	0.22	-0.055	0.62	-0.26	0.018	-0.23	0.037	-0.12	0.26	-0.29	0.0068	-0.24	0.028
HEBP1	blue	-0.11	0.32	0.11	0.32	-0.19	0.077	-0.041	0.71	-0.16	0.16	-0.018	0.87	0.022	0.84	-0.046	0.68	-0.18	0.11	-0.15	0.18	-0.12	0.29
PRCC	blue	0.047	0.68	-0.047	0.68	-0.23	0.037	0.013	0.91	-0.12	0.27	-0.16	0.16	-0.11	0.3	-0.099	0.37	-0.11	0.34	-0.16	0.14	0.01	0.93
MRPL36	blue	0.0022	0.98	-0.0022	0.98	-0.26	0.017	-0.088	0.43	-0.25	0.022	-0.11	0.33	-0.076	0.5	-0.076	0.49	-0.073	0.51	-0.13	0.26	-0.14	0.2
FOXK2	blue	-0.15	0.17	0.15	0.17	-0.3	0.0054	-0.014	0.9	-0.25	0.023	-0.024	0.83	-0.00023	1	0.072	0.52	-0.21	0.051	-0.24	0.026	-0.19	0.091
CDAN1	blue	-0.13	0.24	0.13	0.24	0.014	0.9	0.038	0.73	-0.024	0.83	-0.11	0.31	-0.18	0.098	-0.14	0.21	-0.11	0.31	-0.14	0.19	-0.12	0.28
AMN	blue	-0.1	0.36	0.1	0.36	-0.37	0.00067	-0.34	0.0015	-0.46	1.4e-05	0.22	0.046	0.29	0.0088	0.27	0.014	-0.098	0.38	-0.33	0.0021	-0.17	0.11
CCDC88C	blue	-0.18	0.11	0.18	0.11	-0.27	0.014	0.13	0.25	-0.087	0.44	0.097	0.38	0.1	0.36	0.035	0.75	-0.14	0.21	-0.32	0.0029	-0.19	0.09
HEATR5B	blue	-0.047	0.67	0.047	0.67	-0.3	0.0055	0.052	0.64	-0.14	0.21	0.14	0.21	0.18	0.11	-0.11	0.32	-0.052	0.64	-0.31	0.0041	-0.073	0.51
CACNA2D1	blue	0.17	0.13	-0.17	0.13	0.43	5.2e-05	-0.21	0.051	0.12	0.3	-0.33	0.0024	0.037	0.74	0.42	9.4e-05	0.092	0.41	0.59	5.6e-09	0.35	0.0013
MARCHF9	blue	-0.11	0.33	0.11	0.33	-0.12	0.28	-0.019	0.87	-0.08	0.47	-0.1	0.36	-0.059	0.59	0.033	0.77	-0.037	0.74	-0.22	0.042	-0.086	0.44
PINK1	blue	0.2	0.067	-0.2	0.067	-0.012	0.91	0.042	0.71	0.015	0.9	0.085	0.45	-0.085	0.45	-0.25	0.023	0.17	0.12	0.16	0.15	0.12	0.3
SUMO2	blue	-0.092	0.41	0.092	0.41	-0.24	0.029	-0.081	0.46	-0.2	0.07	-0.051	0.65	-0.0023	0.98	0.082	0.46	-0.014	0.9	-0.26	0.02	-0.073	0.51
IGSF8	blue	-0.00025	1	0.00025	1	-0.16	0.14	0.17	0.13	-0.02	0.86	0.033	0.77	-0.051	0.64	-0.15	0.17	-0.086	0.44	-0.2	0.074	-0.03	0.79
CD82	blue	-0.0026	0.98	0.0026	0.98	-0.32	0.0031	0.15	0.19	-0.038	0.73	0.3	0.0059	0.14	0.21	-0.29	0.0083	-0.048	0.67	-0.35	0.0011	-0.12	0.27
CRELD2	blue	-0.16	0.16	0.16	0.16	-0.15	0.17	0.16	0.14	0.013	0.91	-0.087	0.44	-0.2	0.064	-0.13	0.25	-0.18	0.11	-0.28	0.012	-0.2	0.075
NUP210	blue	-0.086	0.44	0.086	0.44	-0.065	0.56	0.27	0.015	0.18	0.11	0.034	0.76	0.094	0.4	0.055	0.62	-0.072	0.52	-0.19	0.092	0.12	0.29
GYG1	blue	0.094	0.4	-0.094	0.4	0.0021	0.99	0.082	0.46	0.025	0.82	-0.11	0.33	-0.039	0.73	0.071	0.52	-0.072	0.52	0.23	0.041	0.17	0.13
RINT1	blue	0.11	0.34	-0.11	0.34	-0.1	0.37	-0.12	0.27	-0.17	0.13	0.051	0.65	0.24	0.03	0.00036	1	0.12	0.29	-0.12	0.27	0.053	0.63
CAPN3	blue	0.4	0.0002	-0.4	0.0002	0.066	0.55	-0.1	0.36	-0.044	0.69	-0.16	0.15	0.023	0.84	0.054	0.63	0.11	0.33	0.81	8.9e-21	0.34	0.0015
PTGES2	blue	0.11	0.31	-0.11	0.31	-0.29	0.0071	0.044	0.7	-0.089	0.42	-0.21	0.056	-0.038	0.73	0.068	0.54	-0.07	0.53	0.064	0.57	0.04	0.72
MRPL14	blue	0.024	0.83	-0.024	0.83	-0.32	0.0028	-0.024	0.83	-0.24	0.029	-0.046	0.68	-0.032	0.78	-0.052	0.64	0.048	0.67	-0.17	0.12	-0.094	0.4
ARHGAP19	blue	-0.062	0.58	0.062	0.58	-0.23	0.037	0.065	0.56	-0.1	0.36	0.018	0.87	-0.049	0.66	0.0043	0.97	0.0013	0.99	-0.19	0.093	-0.066	0.55
CEBPD	blue	-0.044	0.69	0.044	0.69	-0.02	0.86	0.055	0.62	0.061	0.58	-0.26	0.017	-0.13	0.25	0.062	0.58	-0.019	0.86	0.17	0.12	0.099	0.37
CD34	blue	0.17	0.12	-0.17	0.12	0.32	0.0029	0.033	0.76	0.22	0.044	-0.11	0.31	-0.088	0.43	-0.026	0.82	0.13	0.23	0.47	7.8e-06	0.31	0.004
FANCG	blue	-0.18	0.11	0.18	0.11	-0.19	0.083	0.16	0.14	-0.012	0.91	-0.33	0.0024	-0.21	0.061	-0.079	0.48	-0.092	0.41	-0.26	0.017	-0.18	0.095
GRK6	blue	-0.13	0.23	0.13	0.23	-0.25	0.02	0.12	0.28	0.025	0.82	-0.056	0.61	-0.035	0.76	0.065	0.56	-0.18	0.11	-0.29	0.0071	-0.19	0.088
ANKRD23	blue	0.37	0.00053	-0.37	0.00053	0.17	0.13	-0.2	0.075	-0.067	0.55	-0.27	0.014	0.017	0.88	0.21	0.059	0.035	0.75	0.87	4.8e-26	0.41	0.00013
CDIP1	blue	-0.0023	0.98	0.0023	0.98	-0.24	0.03	0.027	0.81	-0.078	0.48	0.00059	1	0.038	0.74	0.01	0.93	0.046	0.68	-0.15	0.18	-0.049	0.66
SPPL3	blue	-0.13	0.22	0.13	0.22	-0.25	0.024	0.11	0.31	-0.14	0.2	0.33	0.0021	0.089	0.42	-0.16	0.15	-0.2	0.074	-0.38	0.00038	-0.32	0.0036
SNRNP70	blue	-0.23	0.034	0.23	0.034	-0.26	0.018	0.086	0.44	-0.071	0.52	0.069	0.54	0.0047	0.97	-0.077	0.49	-0.21	0.057	-0.36	0.00086	-0.34	0.0017
HMGB3	blue	-0.25	0.025	0.25	0.025	-0.17	0.13	-0.0017	0.99	-0.14	0.21	-0.18	0.1	-0.22	0.051	0.023	0.83	-0.043	0.7	-0.29	0.008	-0.23	0.041
ZYG11B	blue	0.071	0.52	-0.071	0.52	0.087	0.44	-0.066	0.55	-0.085	0.45	-0.0078	0.94	0.022	0.84	-0.087	0.44	-0.049	0.66	0.21	0.058	0.068	0.54
BMP4	blue	0.26	0.017	-0.26	0.017	0.27	0.015	-0.07	0.53	0.13	0.24	-0.11	0.33	0.055	0.62	0.11	0.33	0.15	0.18	0.39	0.00031	0.37	0.00057
DMD	blue	0.46	1e-05	-0.46	1e-05	0.27	0.015	-0.042	0.71	0.21	0.061	-0.26	0.018	-0.014	0.9	-0.031	0.78	0.19	0.083	0.68	2.5e-12	0.59	3.3e-09
TMEM147	blue	0.13	0.25	-0.13	0.25	-0.32	0.0036	0.044	0.69	-0.026	0.82	0.16	0.15	0.16	0.16	-0.13	0.25	0.029	0.79	-0.18	0.11	-0.083	0.46
DGCR8	blue	-0.038	0.73	0.038	0.73	-0.26	0.015	0.041	0.71	-0.2	0.077	-0.11	0.34	-0.016	0.88	-0.11	0.32	-0.15	0.19	-0.15	0.17	-0.075	0.5
B4GALT3	blue	-0.23	0.037	0.23	0.037	-0.067	0.55	0.092	0.41	0.0063	0.95	-0.18	0.098	-0.23	0.036	-0.036	0.74	-0.15	0.17	-0.24	0.03	-0.21	0.059
EPPK1	blue	-0.32	0.0033	0.32	0.0033	-0.12	0.27	0.3	0.0065	0.086	0.44	0.31	0.0046	-0.12	0.27	-0.38	0.00039	-0.18	0.11	-0.38	0.00033	-0.33	0.002
MYOM2	blue	0.33	0.0026	-0.33	0.0026	0.076	0.49	-0.15	0.19	-0.042	0.71	-0.18	0.1	0.069	0.53	0.086	0.44	0.031	0.78	0.76	1.1e-16	0.27	0.013
PEX16	blue	-0.088	0.43	0.088	0.43	-0.025	0.82	0.17	0.12	0.13	0.24	-0.025	0.83	-0.079	0.48	-0.097	0.38	0.15	0.17	-0.13	0.26	0.057	0.61
PLN	blue	0.41	0.00012	-0.41	0.00012	0.26	0.018	-0.12	0.29	0.11	0.32	-0.23	0.038	0.016	0.89	0.16	0.15	0.093	0.4	0.81	1.3e-20	0.48	4.2e-06
THSD7A	blue	0.26	0.016	-0.26	0.016	0.33	0.002	0.069	0.54	0.29	0.0088	-0.26	0.016	-0.059	0.59	0.059	0.6	0.029	0.79	0.59	4e-09	0.52	5.1e-07
GSTP1	blue	-0.32	0.0034	0.32	0.0034	-0.36	0.00097	0.068	0.54	-0.26	0.016	0.062	0.58	-0.073	0.51	-0.13	0.24	-0.41	0.00013	-0.49	2.7e-06	-0.43	4.3e-05
PKIA	blue	0.46	9.9e-06	-0.46	9.9e-06	0.12	0.27	-0.26	0.016	-0.055	0.62	-0.22	0.047	0.18	0.1	0.19	0.081	0.21	0.06	0.76	1e-16	0.42	9.5e-05
ARF5	blue	-0.031	0.78	0.031	0.78	-0.21	0.052	-0.048	0.67	-0.19	0.091	0.093	0.4	0.056	0.61	-0.017	0.88	-0.069	0.54	-0.17	0.13	-0.032	0.77
PAK6	blue	-0.027	0.81	0.027	0.81	-0.23	0.038	0.16	0.15	-0.023	0.83	0.26	0.017	0.09	0.42	-0.17	0.13	-0.1	0.36	-0.26	0.019	-0.19	0.079
SEMA6A	blue	0.067	0.55	-0.067	0.55	0.19	0.081	0.042	0.7	0.12	0.27	-0.14	0.21	-0.078	0.48	0.08	0.47	0.075	0.5	0.23	0.036	0.15	0.17
AGA	blue	0.035	0.75	-0.035	0.75	-0.23	0.037	0.073	0.51	-0.096	0.39	0.22	0.051	0.14	0.21	-0.083	0.46	-0.01	0.93	-0.36	0.00096	-0.1	0.37
CDH15	blue	0.11	0.32	-0.11	0.32	0.3	0.0063	-0.17	0.12	-0.0067	0.95	-0.22	0.044	-0.17	0.12	0.13	0.23	-0.028	0.8	0.67	4.8e-12	0.18	0.1
PRPF31	blue	0.042	0.7	-0.042	0.7	-0.25	0.021	0.028	0.8	-0.088	0.43	-0.1	0.37	-0.01	0.93	-0.1	0.35	-0.11	0.32	-0.2	0.067	-0.018	0.87
PCK2	blue	0.017	0.88	-0.017	0.88	-0.22	0.043	0.08	0.47	0.04	0.72	0.12	0.26	0.11	0.33	-0.13	0.24	0.015	0.89	-0.19	0.078	-0.067	0.55
SCLT1	blue	-0.29	0.0089	0.29	0.0089	-0.056	0.62	0.24	0.028	0.17	0.12	0.00052	1	-0.15	0.17	-0.15	0.18	-0.075	0.5	-0.28	0.01	-0.28	0.011
UTP4	blue	-0.098	0.38	0.098	0.38	-0.19	0.085	0.1	0.35	-0.0045	0.97	-0.12	0.28	-0.18	0.098	-0.15	0.19	-0.23	0.036	-0.2	0.065	-0.11	0.31
EBNA1BP2	blue	-0.11	0.3	0.11	0.3	-0.18	0.11	-0.038	0.73	-0.17	0.12	0.0051	0.96	-0.13	0.25	-0.099	0.37	-0.019	0.86	-0.29	0.0084	-0.22	0.047
DNAJC13	blue	-0.12	0.29	0.12	0.29	-0.22	0.047	0.058	0.61	-0.078	0.49	0.094	0.4	0.12	0.29	-0.16	0.16	-0.22	0.043	-0.19	0.092	-0.15	0.17
SGMS1	blue	-0.11	0.3	0.11	0.3	-0.083	0.46	0.3	0.0062	0.17	0.11	0.026	0.81	-0.12	0.28	-0.3	0.0059	-0.14	0.22	-0.18	0.11	-0.088	0.43
PRKCH	blue	-0.046	0.68	0.046	0.68	-0.11	0.33	0.16	0.15	0.097	0.38	0.25	0.021	0.0021	0.98	-0.23	0.038	-0.013	0.91	-0.18	0.098	-0.075	0.5
ALG9	blue	-0.047	0.67	0.047	0.67	-0.17	0.13	0.34	0.0019	0.13	0.23	-0.023	0.83	-0.094	0.4	-0.3	0.0058	0.034	0.76	-0.15	0.17	-0.056	0.61
ATP6V0C	blue	-0.049	0.66	0.049	0.66	-0.11	0.33	0.22	0.041	0.16	0.15	0.18	0.11	0.1	0.35	-0.19	0.083	-0.031	0.78	-0.22	0.042	-0.017	0.88
TWSG1	blue	-0.043	0.7	0.043	0.7	0.21	0.061	0.047	0.67	0.022	0.85	-0.2	0.067	-0.29	0.008	-0.12	0.27	-0.14	0.21	0.16	0.15	-0.069	0.53
KANSL1L	blue	0.24	0.029	-0.24	0.029	0.031	0.78	-0.12	0.3	-0.036	0.75	-0.22	0.05	0.063	0.57	0.2	0.072	-0.042	0.71	0.34	0.0018	0.25	0.02
B4GAT1	blue	0.052	0.64	-0.052	0.64	0.35	0.0011	0.024	0.83	0.16	0.15	-0.44	2.8e-05	-0.36	0.00087	-0.011	0.92	0.02	0.86	0.3	0.0061	0.28	0.011
DDX18	blue	-0.044	0.7	0.044	0.7	-0.12	0.29	0.035	0.75	0.0079	0.94	-0.038	0.74	-0.09	0.42	-0.045	0.69	-0.12	0.29	-0.17	0.13	-0.086	0.44
GRB14	blue	0.063	0.57	-0.063	0.57	-0.027	0.81	-0.26	0.019	-0.19	0.082	-0.36	0.00072	-0.093	0.4	0.41	0.00014	-0.0082	0.94	0.34	0.0015	0.092	0.41
ZBTB47	blue	0.2	0.069	-0.2	0.069	0.21	0.061	0.15	0.17	0.24	0.031	-0.12	0.3	-0.094	0.4	-0.14	0.2	0.045	0.69	0.45	2.3e-05	0.3	0.0055
SLC25A5	blue	-0.11	0.34	0.11	0.34	-0.2	0.064	0.083	0.45	-0.084	0.45	0.0041	0.97	-0.064	0.57	-0.17	0.13	-0.13	0.25	-0.36	0.00078	-0.18	0.1
SPEG	blue	0.12	0.3	-0.12	0.3	0.089	0.42	-0.034	0.76	-0.016	0.89	-0.45	2.2e-05	-0.2	0.076	0.17	0.12	-0.069	0.54	0.48	3.5e-06	0.23	0.033
PDLIM4	blue	-0.16	0.16	0.16	0.16	-0.15	0.17	0.16	0.14	0.028	0.8	-0.05	0.66	-0.052	0.64	-0.1	0.36	-0.14	0.2	-0.27	0.015	-0.051	0.65
FBXL14	blue	-0.047	0.67	0.047	0.67	-0.11	0.34	0.16	0.16	0.033	0.77	0.014	0.9	0.075	0.5	-0.16	0.16	0.049	0.66	-0.19	0.082	0.047	0.67
SETD1B	blue	-0.058	0.6	0.058	0.6	-0.17	0.13	0.16	0.14	0.056	0.61	0.041	0.71	0.058	0.6	-0.14	0.2	0.063	0.57	-0.24	0.03	0.0011	0.99
PIGG	blue	0.075	0.5	-0.075	0.5	-0.16	0.16	0.26	0.016	0.1	0.35	-0.032	0.77	-0.023	0.83	-0.26	0.017	-0.035	0.75	-0.21	0.054	0.13	0.24
NPR2	blue	0.16	0.14	-0.16	0.14	0.46	1e-05	-0.0014	0.99	0.22	0.049	-0.27	0.015	-0.22	0.042	0.074	0.5	0.11	0.31	0.45	1.8e-05	0.36	0.00069
KRI1	blue	-0.2	0.068	0.2	0.068	-0.039	0.72	0.3	0.0067	0.17	0.12	0.13	0.23	-0.2	0.073	-0.29	0.0079	-0.14	0.21	-0.23	0.039	-0.15	0.16
JPH1	blue	0.1	0.35	-0.1	0.35	0.091	0.41	-0.16	0.14	-0.14	0.21	-0.17	0.12	0.06	0.59	0.18	0.095	-0.087	0.43	0.47	8.1e-06	0.13	0.24
OSBPL11	blue	-0.006	0.96	0.006	0.96	0.058	0.6	0.28	0.011	0.17	0.12	-0.095	0.39	-0.067	0.55	-0.2	0.064	-0.097	0.38	0.21	0.057	0.053	0.64
KIF3B	blue	-0.12	0.28	0.12	0.28	-0.018	0.87	-0.14	0.2	-0.19	0.078	-0.071	0.52	-0.16	0.14	0.023	0.84	-0.19	0.079	-0.17	0.13	-0.011	0.92
C19orf44	blue	0.058	0.6	-0.058	0.6	0.15	0.17	0.16	0.15	0.17	0.12	-0.3	0.0059	-0.26	0.02	-0.037	0.74	-0.1	0.35	0.21	0.057	0.14	0.21
NR4A1	blue	0.3	0.0059	-0.3	0.0059	0.29	0.0088	-0.11	0.31	0.21	0.052	-0.26	0.016	0.0069	0.95	0.11	0.31	0.21	0.053	0.49	2.9e-06	0.43	5.5e-05
PI4K2B	blue	-0.0094	0.93	0.0094	0.93	-0.09	0.42	0.22	0.042	0.092	0.41	-0.033	0.77	-0.081	0.47	-0.27	0.014	-0.055	0.62	-0.12	0.27	-0.0033	0.98
STK19	blue	0.18	0.1	-0.18	0.1	-0.18	0.094	0.22	0.044	0.18	0.099	0.15	0.16	0.15	0.19	-0.29	0.0084	0.022	0.84	-0.15	0.18	-0.028	0.8
ASMTL	blue	-0.076	0.5	0.076	0.5	0.21	0.054	0.017	0.88	0.081	0.46	-0.17	0.13	-0.11	0.31	0.11	0.34	0.1	0.35	0.21	0.063	0.15	0.19
RPP30	blue	0.066	0.55	-0.066	0.55	-0.15	0.19	0.19	0.083	0.082	0.46	-0.14	0.21	-0.12	0.28	-0.19	0.093	-0.1	0.35	0.077	0.49	0.016	0.89
ATG12	blue	-0.15	0.16	0.15	0.16	-0.045	0.68	0.36	0.0008	0.14	0.2	0.017	0.88	-0.1	0.36	-0.2	0.075	-0.21	0.056	-0.22	0.041	-0.17	0.13
FAM53B	blue	-0.023	0.84	0.023	0.84	-0.11	0.3	0.063	0.57	0.017	0.88	0.085	0.44	0.02	0.86	-0.069	0.54	0.0037	0.97	-0.2	0.076	-0.092	0.41
SNIP1	blue	-0.065	0.56	0.065	0.56	-0.21	0.052	0.22	0.05	0.091	0.41	0.086	0.44	-0.052	0.64	-0.2	0.075	-0.17	0.13	-0.22	0.043	-0.022	0.84
TEK	blue	0.24	0.029	-0.24	0.029	0.48	3.7e-06	0.13	0.24	0.4	0.00015	-0.17	0.12	-0.084	0.45	-0.017	0.88	0.062	0.58	0.64	7.7e-11	0.41	0.00011
CD101	blue	0.044	0.69	-0.044	0.69	-0.17	0.13	0.38	0.00043	0.2	0.077	0.13	0.24	-0.019	0.86	-0.34	0.0018	-0.16	0.14	-0.2	0.075	-0.074	0.5
INTS1	blue	-0.23	0.039	0.23	0.039	0.031	0.78	0.24	0.027	0.13	0.24	0.077	0.49	-0.14	0.2	-0.24	0.032	-0.065	0.56	-0.21	0.056	-0.049	0.66
ALPK3	blue	0.24	0.03	-0.24	0.03	0.28	0.01	-0.03	0.79	0.15	0.19	-0.11	0.33	0.049	0.66	-0.021	0.85	-0.066	0.55	0.72	9.5e-15	0.29	0.0071
IPPK	blue	-0.041	0.71	0.041	0.71	-0.23	0.033	0.2	0.073	0.041	0.71	0.35	0.0011	0.15	0.19	-0.29	0.0069	0.026	0.81	-0.28	0.011	-0.2	0.07
SHKBP1	blue	-0.017	0.88	0.017	0.88	-0.24	0.027	0.16	0.15	0.038	0.73	0.13	0.24	-0.0069	0.95	-0.24	0.03	-0.075	0.5	-0.32	0.0034	-0.057	0.61
KLHL17	blue	0.11	0.31	-0.11	0.31	-0.19	0.081	0.037	0.74	0.021	0.85	-0.047	0.67	0.016	0.88	-0.16	0.16	-0.1	0.35	-0.095	0.39	0.015	0.89
ANKRD13A	blue	-0.02	0.86	0.02	0.86	-0.061	0.58	0.19	0.08	0.12	0.28	0.14	0.19	-0.028	0.8	-0.31	0.0042	-0.0079	0.94	-0.27	0.015	0.13	0.26
ESRP1	blue	-0.016	0.89	0.016	0.89	-0.26	0.019	0.15	0.17	0.047	0.67	0.31	0.0044	0.16	0.16	-0.18	0.1	0.085	0.44	-0.46	9.7e-06	-0.17	0.11
CAMSAP1	blue	0.029	0.79	-0.029	0.79	-0.11	0.34	0.22	0.043	0.1	0.35	0.18	0.099	0.12	0.27	-0.26	0.016	-0.14	0.22	-0.15	0.17	0.04	0.72
BEST3	blue	0.32	0.0029	-0.32	0.0029	0.21	0.057	-0.11	0.33	0.051	0.65	-0.22	0.048	-0.044	0.69	0.043	0.7	0.02	0.86	0.81	9.4e-21	0.26	0.019
TINCR	blue	-0.017	0.88	0.017	0.88	-0.38	0.00043	-0.054	0.63	-0.25	0.025	0.34	0.0017	0.3	0.0062	-0.026	0.81	0.013	0.9	-0.38	0.00039	-0.26	0.019
SCARB2	blue	-0.049	0.66	0.049	0.66	0.21	0.062	0.17	0.13	0.15	0.19	-0.18	0.11	-0.21	0.061	-0.034	0.76	0.081	0.47	0.16	0.14	0.14	0.21
FBXO45	blue	-0.28	0.011	0.28	0.011	-0.18	0.1	0.015	0.89	-0.19	0.089	0.19	0.086	-0.018	0.87	-0.094	0.4	-0.11	0.32	-0.37	0.00054	-0.4	0.00018
TFE3	blue	-0.11	0.33	0.11	0.33	0.049	0.66	0.22	0.05	0.12	0.28	0.074	0.51	-0.13	0.24	-0.24	0.03	0.0078	0.94	-0.15	0.17	-0.031	0.78
EML3	blue	0.025	0.82	-0.025	0.82	-0.21	0.055	0.082	0.46	-0.02	0.86	0.16	0.14	0.16	0.14	-0.098	0.38	-0.02	0.86	-0.15	0.18	-0.025	0.82
TTLL11	blue	0.14	0.2	-0.14	0.2	0.003	0.98	0.28	0.011	0.15	0.18	-0.077	0.49	-0.074	0.51	-0.27	0.015	-0.081	0.47	0.37	0.00061	0.049	0.66
ACP1	blue	-0.054	0.63	0.054	0.63	-0.19	0.092	0.15	0.16	-0.0036	0.97	-0.12	0.27	-0.054	0.63	-0.043	0.7	-0.036	0.75	-0.15	0.18	0.092	0.41
PPP1R3F	blue	0.21	0.055	-0.21	0.055	0.2	0.067	0.098	0.38	0.22	0.046	-0.16	0.15	-0.045	0.69	-0.13	0.25	-0.042	0.7	0.42	8.2e-05	0.29	0.0077
EXOG	blue	-0.0082	0.94	0.0082	0.94	0.023	0.84	0.25	0.022	0.21	0.053	-0.25	0.025	-0.22	0.048	-0.13	0.23	-0.18	0.11	0.15	0.19	0.12	0.3
FNTA	blue	-0.09	0.42	0.09	0.42	-0.1	0.36	0.066	0.55	-0.11	0.34	-0.096	0.39	-0.049	0.66	0.00066	1	-0.068	0.54	-0.15	0.19	-0.036	0.75
CRYZL1	blue	0.18	0.11	-0.18	0.11	-0.079	0.48	-0.076	0.49	-0.16	0.15	-0.1	0.36	0.05	0.65	0.02	0.86	0.034	0.76	0.22	0.042	0.25	0.021
CAMK2G	blue	-0.058	0.6	0.058	0.6	0.053	0.63	0.087	0.44	0.036	0.75	0.025	0.82	-0.057	0.61	-0.11	0.31	-0.18	0.095	0.16	0.14	-0.046	0.68
STK31	blue	-0.22	0.048	0.22	0.048	-0.14	0.2	0.16	0.16	0.01	0.93	0.22	0.041	0.088	0.43	-0.081	0.46	-0.096	0.39	-0.25	0.02	-0.12	0.29
IRAK1	blue	-0.28	0.0098	0.28	0.0098	-0.21	0.056	0.16	0.16	0.025	0.82	0.016	0.89	-0.074	0.51	-0.19	0.084	-0.25	0.023	-0.33	0.0024	-0.26	0.016
ZC3H11A	blue	-0.1	0.36	0.1	0.36	-0.12	0.26	0.2	0.074	0.093	0.4	0.0035	0.98	0.042	0.7	-0.17	0.12	-0.077	0.49	-0.16	0.16	0.025	0.83
DUSP13	blue	0.29	0.0083	-0.29	0.0083	0.087	0.43	-0.25	0.024	-0.13	0.24	-0.21	0.06	0.05	0.65	0.25	0.022	0.084	0.45	0.71	8.6e-14	0.33	0.002
ACOT11	blue	-0.075	0.5	0.075	0.5	-0.27	0.013	0.25	0.025	0.031	0.78	0.39	0.00023	0.063	0.57	-0.39	0.00028	-0.2	0.073	-0.29	0.0085	-0.19	0.082
JMY	blue	0.14	0.2	-0.14	0.2	-0.075	0.5	-0.054	0.63	-0.022	0.85	0.18	0.11	0.27	0.013	0.021	0.85	-0.026	0.81	0.15	0.17	0.13	0.23
SMG8	blue	-0.25	0.022	0.25	0.022	0.011	0.92	0.15	0.17	0.12	0.29	0.12	0.27	-0.023	0.83	-0.0072	0.95	-0.0074	0.95	-0.25	0.023	-0.091	0.41
ALDH1A2	blue	0.36	0.00075	-0.36	0.00075	0.38	0.00037	-0.016	0.89	0.28	0.012	-0.17	0.12	-0.097	0.38	0.04	0.72	0.17	0.12	0.59	3.9e-09	0.48	5.3e-06
RTF1	blue	0.15	0.18	-0.15	0.18	0.044	0.69	0.036	0.75	0.049	0.66	-0.11	0.3	0.011	0.92	-0.13	0.26	-0.072	0.52	0.29	0.0083	0.17	0.13
MTAP	blue	-0.21	0.057	0.21	0.057	-0.047	0.67	0.15	0.18	0.056	0.62	0.17	0.13	-0.11	0.34	-0.22	0.051	-0.14	0.22	-0.26	0.019	-0.2	0.077
PDK2	blue	0.092	0.41	-0.092	0.41	0.19	0.078	0.032	0.78	0.057	0.61	-0.13	0.23	-0.12	0.28	-0.015	0.89	-0.02	0.86	0.34	0.0016	0.35	0.0012
SYNCRIP	blue	-0.083	0.45	0.083	0.45	-0.15	0.18	0.23	0.035	0.059	0.6	0.089	0.42	0.028	0.8	-0.16	0.14	-0.17	0.13	-0.2	0.077	-0.13	0.23
DNAJC4	blue	0.22	0.048	-0.22	0.048	-0.072	0.52	-0.046	0.68	-0.08	0.47	-0.22	0.045	0.054	0.63	0.15	0.17	0.15	0.16	0.4	0.00021	0.32	0.0031
CCDC71L	blue	-0.084	0.45	0.084	0.45	0.3	0.0051	0.24	0.026	0.31	0.0039	-0.16	0.16	-0.26	0.016	-0.065	0.56	-0.0036	0.97	0.3	0.0052	0.21	0.055
SPATA2	blue	0.094	0.4	-0.094	0.4	-0.14	0.2	-0.05	0.65	-0.084	0.45	0.012	0.91	0.031	0.78	-0.054	0.63	-0.093	0.4	0.12	0.28	0.12	0.3
BBS7	blue	-0.0068	0.95	0.0068	0.95	-0.1	0.36	0.12	0.3	-0.037	0.74	0.16	0.14	-0.0019	0.99	-0.29	0.0071	-0.029	0.8	-0.17	0.13	-0.068	0.54
MAST4	blue	0.1	0.35	-0.1	0.35	-0.052	0.64	0.35	0.0014	0.3	0.0058	0.16	0.16	0.19	0.087	-0.32	0.0035	-0.12	0.28	-0.15	0.16	0.13	0.23
ZNF148	blue	-0.17	0.12	0.17	0.12	0.046	0.68	0.027	0.81	0.053	0.63	0.018	0.87	0.093	0.4	0.13	0.24	-0.026	0.82	-0.17	0.12	0.017	0.88
AP2A1	blue	-0.21	0.059	0.21	0.059	-0.06	0.59	0.28	0.01	0.14	0.22	0.048	0.66	-0.12	0.26	-0.28	0.01	-0.12	0.28	-0.22	0.045	-0.14	0.21
CCDC28B	blue	-0.089	0.42	0.089	0.42	0.11	0.33	-0.14	0.21	-0.051	0.65	-0.33	0.0021	-0.17	0.13	0.24	0.032	-0.11	0.32	0.24	0.031	0.067	0.55
KPNA5	blue	0.26	0.019	-0.26	0.019	0.042	0.71	-0.032	0.77	0.0067	0.95	-0.12	0.27	0.026	0.82	0.083	0.46	0.12	0.29	0.38	0.0004	0.38	0.00043
PLA2G4A	blue	-0.087	0.44	0.087	0.44	-0.16	0.15	-0.23	0.041	-0.33	0.0023	0.11	0.34	0.095	0.39	-0.0038	0.97	-0.055	0.62	-0.16	0.14	-0.14	0.2
TMEM41B	blue	-0.17	0.13	0.17	0.13	-0.26	0.018	0.21	0.06	-0.033	0.77	0.018	0.87	-0.1	0.36	-0.19	0.091	-0.24	0.029	-0.22	0.044	-0.21	0.053
GGCT	blue	-0.034	0.76	0.034	0.76	-0.31	0.005	0.066	0.55	-0.078	0.48	0.15	0.17	-0.0028	0.98	-0.078	0.48	0.042	0.71	-0.22	0.048	-0.13	0.24
DMPK	blue	0.27	0.014	-0.27	0.014	0.16	0.15	-0.00033	1	0.16	0.15	-0.26	0.019	-0.031	0.78	0.052	0.64	-0.12	0.3	0.66	1e-11	0.32	0.0032
SATB1	blue	0.32	0.0032	-0.32	0.0032	0.26	0.019	-0.001	0.99	0.18	0.096	-0.041	0.72	0.22	0.043	0.1	0.35	0.21	0.054	0.51	1.1e-06	0.47	6.2e-06
MRPL40	blue	0.1	0.36	-0.1	0.36	-0.022	0.85	-0.11	0.33	-0.077	0.49	-0.2	0.063	-0.093	0.4	0.14	0.22	0.051	0.65	0.12	0.3	0.17	0.13
TNFRSF1A	blue	-0.064	0.56	0.064	0.56	0.11	0.33	0.072	0.52	0.016	0.89	-0.082	0.46	-0.14	0.21	-0.15	0.18	-0.14	0.2	0.14	0.19	-0.034	0.76
CYRIB	blue	-0.24	0.026	0.24	0.026	0.15	0.17	0.26	0.018	0.15	0.17	-0.14	0.21	-0.28	0.011	-0.23	0.034	-0.35	0.0013	0.13	0.23	-0.12	0.27
LIN7C	blue	0.057	0.61	-0.057	0.61	-0.21	0.061	0.044	0.69	-0.015	0.89	0.074	0.5	0.19	0.085	-0.0037	0.97	-0.12	0.27	-0.13	0.23	0.053	0.64
ZNF181	blue	0.22	0.047	-0.22	0.047	0.16	0.16	0.0093	0.93	0.11	0.34	-0.18	0.11	0.032	0.77	0.063	0.57	0.075	0.5	0.5	1.9e-06	0.4	0.00015
MT-ATP6	blue	0.07	0.53	-0.07	0.53	0.068	0.54	0.017	0.88	0.015	0.9	-0.19	0.081	-0.071	0.52	-0.01	0.93	0.059	0.6	0.36	0.00072	0.26	0.017
DGCR6	blue	0.14	0.21	-0.14	0.21	0.04	0.72	-0.34	0.0018	-0.24	0.03	-0.25	0.023	0.16	0.15	0.4	0.0002	0.071	0.53	0.52	4.8e-07	0.24	0.026
COX10	blue	-0.087	0.44	0.087	0.44	0.13	0.26	0.053	0.64	0.029	0.79	-0.1	0.37	-0.1	0.35	-0.086	0.44	-0.051	0.64	0.19	0.087	0.012	0.92
GNG11	blue	0.22	0.042	-0.22	0.042	0.26	0.019	-0.028	0.8	0.15	0.18	-0.13	0.25	0.054	0.63	0.083	0.46	0.16	0.14	0.41	0.00011	0.3	0.0059
ZZEF1	blue	-0.055	0.62	0.055	0.62	0.019	0.87	0.33	0.0023	0.21	0.058	0.089	0.42	-0.091	0.41	-0.4	0.00015	-0.23	0.034	0.096	0.39	0.026	0.82
ADCY3	blue	-0.098	0.38	0.098	0.38	0.18	0.1	0.095	0.39	0.17	0.13	-0.049	0.66	-0.1	0.35	-0.1	0.35	-0.095	0.39	0.22	0.051	-0.023	0.84
SLC25A39	blue	-0.11	0.3	0.11	0.3	-0.25	0.025	0.1	0.37	-0.09	0.42	0.2	0.064	-0.02	0.86	-0.099	0.37	-0.092	0.41	-0.36	0.00089	-0.21	0.053
PTCD2	blue	0.042	0.71	-0.042	0.71	0.017	0.88	0.18	0.097	0.053	0.64	-0.077	0.49	-0.17	0.12	-0.2	0.069	-0.034	0.76	0.2	0.075	0.0062	0.96
HMGA1	blue	-0.095	0.39	0.095	0.39	-0.4	0.00016	-0.075	0.5	-0.26	0.019	0.1	0.35	0.053	0.63	0.053	0.64	-0.12	0.26	-0.38	0.00042	-0.3	0.0057
RPUSD4	blue	0.16	0.16	-0.16	0.16	-0.13	0.24	-0.14	0.22	-0.08	0.47	-0.062	0.58	0.085	0.44	0.1	0.36	0.0083	0.94	0.09	0.42	-0.019	0.87
ANAPC2	blue	0.017	0.88	-0.017	0.88	-0.2	0.067	0.13	0.26	-0.012	0.91	0.016	0.89	-0.013	0.91	-0.19	0.082	0.045	0.69	-0.1	0.35	0.081	0.47
CSRP3	blue	0.28	0.012	-0.28	0.012	0.2	0.073	-0.18	0.1	-0.0028	0.98	-0.19	0.09	0.011	0.92	0.074	0.51	-0.013	0.91	0.72	1.4e-14	0.21	0.062
JPT2	blue	-0.098	0.38	0.098	0.38	-0.13	0.24	-0.043	0.7	-0.19	0.088	-0.042	0.71	-0.16	0.14	-0.059	0.6	-0.074	0.51	-0.2	0.072	-0.1	0.35
FAM86C1	blue	-0.06	0.59	0.06	0.59	0.048	0.67	-0.11	0.31	-0.12	0.26	-0.045	0.68	-0.16	0.15	-0.07	0.53	-0.023	0.84	-0.14	0.2	-0.12	0.28
SSR1	blue	-0.091	0.41	0.091	0.41	-0.045	0.68	0.2	0.071	0.041	0.71	0.25	0.024	0.024	0.83	-0.33	0.0025	-0.14	0.22	-0.23	0.037	0.027	0.81
MYOF	blue	-0.37	0.00068	0.37	0.00068	0.018	0.87	0.058	0.6	-0.094	0.4	0.17	0.12	-0.17	0.13	-0.13	0.25	-0.15	0.17	-0.3	0.006	-0.29	0.0086
ARL10	blue	0.075	0.5	-0.075	0.5	0.22	0.043	-0.14	0.2	0.013	0.91	-0.011	0.92	0.054	0.63	0.21	0.052	0.021	0.85	0.14	0.2	0.063	0.57
ATF2	blue	-0.041	0.71	0.041	0.71	0.19	0.087	-0.048	0.67	0.0074	0.95	-0.17	0.13	-0.11	0.32	0.16	0.14	-0.048	0.67	0.15	0.17	0.13	0.23
RGMB	blue	0.0043	0.97	-0.0043	0.97	0.079	0.48	0.15	0.19	0.081	0.46	-0.13	0.26	-0.093	0.4	-0.13	0.23	-0.043	0.7	0.23	0.035	0.17	0.13
ALS2CL	blue	0.11	0.34	-0.11	0.34	-0.36	0.00075	0.27	0.012	-0.022	0.85	0.49	2.9e-06	0.22	0.044	-0.48	4e-06	-0.084	0.45	-0.34	0.0018	-0.15	0.16
TSPAN14	blue	-0.26	0.017	0.26	0.017	-0.028	0.8	0.13	0.25	-0.0016	0.99	0.11	0.34	-0.07	0.53	-0.12	0.27	-0.088	0.43	-0.23	0.037	-0.16	0.15
SHANK3	blue	-0.049	0.66	0.049	0.66	0.21	0.053	-0.0026	0.98	0.058	0.61	-0.19	0.087	-0.27	0.015	-0.048	0.67	-0.032	0.77	0.18	0.11	0.061	0.59
PIGW	blue	-0.11	0.34	0.11	0.34	-0.27	0.012	0.025	0.82	-0.25	0.021	0.16	0.14	-0.046	0.68	-0.19	0.088	-0.21	0.063	-0.24	0.028	-0.23	0.04
SNX21	blue	0.2	0.071	-0.2	0.071	0.091	0.41	0.052	0.64	0.059	0.6	0.26	0.016	0.057	0.61	-0.19	0.08	0.063	0.57	0.26	0.016	0.2	0.065
GSTM2	blue	0.28	0.0095	-0.28	0.0095	-0.027	0.81	-0.39	0.00027	-0.22	0.05	-0.1	0.35	0.32	0.003	0.55	6.1e-08	0.11	0.31	0.46	1.4e-05	0.38	0.00041
ZNF419	blue	0.16	0.14	-0.16	0.14	-0.078	0.48	-0.083	0.45	-0.085	0.44	-0.21	0.062	-0.022	0.84	0.11	0.34	0.03	0.79	0.3	0.0059	0.22	0.048
NUDCD3	blue	-0.093	0.4	0.093	0.4	-0.0023	0.98	0.11	0.33	-0.053	0.63	0.0052	0.96	-0.16	0.15	-0.16	0.15	-0.023	0.84	0.052	0.64	-0.058	0.6
ZNF414	blue	0.0067	0.95	-0.0067	0.95	-0.22	0.042	0.3	0.0061	0.14	0.2	0.002	0.99	0.097	0.38	-0.072	0.52	-0.053	0.63	-0.15	0.18	0.082	0.46
MIS18A	blue	0.038	0.73	-0.038	0.73	-0.27	0.014	0.02	0.86	-0.12	0.29	0.017	0.88	0.064	0.56	-0.091	0.41	0.04	0.72	-0.24	0.029	-0.018	0.87
TMPO	blue	-0.24	0.031	0.24	0.031	-0.1	0.36	0.17	0.13	0.011	0.92	0.026	0.82	-0.034	0.76	-0.17	0.12	-0.16	0.14	-0.3	0.0055	-0.26	0.019
LYPLA2	blue	-0.1	0.35	0.1	0.35	-0.27	0.014	0.19	0.093	-0.08	0.47	0.036	0.74	-0.15	0.18	-0.31	0.004	-0.2	0.073	-0.19	0.093	-0.11	0.34
MYBPH	blue	0.05	0.65	-0.05	0.65	0.26	0.017	-0.15	0.19	-0.0098	0.93	-0.24	0.028	-0.17	0.13	0.071	0.52	-0.06	0.59	0.56	3.9e-08	0.021	0.85
CCDC84	blue	-0.048	0.66	0.048	0.66	-0.14	0.22	-0.00034	1	-0.11	0.34	-0.048	0.67	0.0063	0.95	0.024	0.83	-0.059	0.6	-0.082	0.46	-0.014	0.9
MFSD10	blue	-0.15	0.18	0.15	0.18	-0.12	0.28	0.18	0.1	0.079	0.48	-0.033	0.77	-0.22	0.043	-0.26	0.018	-0.075	0.5	-0.28	0.0099	-0.09	0.42
ACTR3	blue	-0.18	0.1	0.18	0.1	0.18	0.098	0.21	0.053	0.18	0.1	0.024	0.83	-0.21	0.058	-0.24	0.03	-0.31	0.0043	-0.14	0.21	-0.09	0.42
ELOF1	blue	-0.026	0.81	0.026	0.81	-0.18	0.11	0.091	0.41	0.024	0.83	0.16	0.15	0.082	0.46	-0.021	0.85	-0.059	0.59	-0.19	0.083	-0.018	0.87
GCH1	blue	0.04	0.72	-0.04	0.72	-0.18	0.11	0.29	0.0088	0.19	0.088	0.12	0.3	0.051	0.65	-0.24	0.026	-0.2	0.071	-0.16	0.16	-0.0033	0.98
MRVI1	blue	0.12	0.28	-0.12	0.28	0.34	0.0015	0.12	0.27	0.26	0.019	0.03	0.79	-0.12	0.27	-0.19	0.08	0.085	0.45	0.26	0.016	0.26	0.016
CDV3	blue	-0.07	0.53	0.07	0.53	0.011	0.92	0.18	0.11	0.079	0.48	-0.01	0.93	-0.12	0.29	-0.26	0.018	-0.19	0.09	0.094	0.4	-0.062	0.58
SPTB	blue	0.23	0.038	-0.23	0.038	0.27	0.013	-0.12	0.27	0.067	0.55	-0.26	0.017	-0.11	0.31	0.09	0.42	-0.026	0.81	0.79	3.2e-19	0.29	0.0072
CDC25A	blue	-0.12	0.27	0.12	0.27	-0.3	0.0058	0.35	0.0013	0.06	0.59	-0.015	0.89	-0.15	0.18	-0.31	0.0043	-0.17	0.13	-0.32	0.0028	-0.24	0.031
PDXK	blue	-0.14	0.2	0.14	0.2	-0.23	0.033	0.38	0.00034	0.12	0.3	0.23	0.037	0.02	0.86	-0.44	3.2e-05	-0.17	0.12	-0.27	0.013	-0.1	0.34
ARCN1	blue	0.074	0.51	-0.074	0.51	0.18	0.099	-0.0056	0.96	0.0099	0.93	0.083	0.46	-0.1	0.35	-0.17	0.13	-0.0082	0.94	0.32	0.0036	0.067	0.55
UBA2	blue	-0.094	0.4	0.094	0.4	-0.093	0.4	0.015	0.89	-0.073	0.51	-0.052	0.64	-0.048	0.67	-0.01	0.93	-0.075	0.5	-0.13	0.24	-0.057	0.61
SLC25A13	blue	-0.12	0.3	0.12	0.3	0.038	0.74	0.18	0.1	0.088	0.43	0.12	0.27	-0.14	0.22	-0.23	0.038	-0.059	0.59	-0.19	0.093	-0.088	0.43
SDF2	blue	-0.064	0.57	0.064	0.57	0.22	0.042	0.092	0.41	0.23	0.035	-0.0019	0.99	-0.054	0.63	0.0028	0.98	-0.0018	0.99	0.12	0.27	0.1	0.37
ATG3	blue	0.027	0.81	-0.027	0.81	-0.26	0.016	0.15	0.17	-0.014	0.9	0.15	0.17	0.027	0.81	-0.14	0.21	0.055	0.62	-0.28	0.011	0.04	0.72
ZNF133	blue	-0.11	0.33	0.11	0.33	-0.21	0.057	0.056	0.61	-0.18	0.11	-0.088	0.43	-0.14	0.21	-0.065	0.56	-0.04	0.72	-0.21	0.055	-0.004	0.97
SMN1	blue	-0.056	0.61	0.056	0.61	-0.08	0.47	0.13	0.24	0.0027	0.98	-0.0062	0.96	-0.03	0.79	-0.15	0.17	-0.13	0.23	-0.15	0.16	-0.04	0.72
EFR3B	blue	0.043	0.7	-0.043	0.7	0.15	0.18	-0.14	0.22	-0.1	0.35	0.16	0.16	-0.17	0.12	-0.045	0.69	0.11	0.31	0.21	0.056	0.035	0.75
IER5L	blue	-0.24	0.029	0.24	0.029	0.039	0.72	0.33	0.0027	0.24	0.032	-0.2	0.074	-0.28	0.011	-0.13	0.25	-0.27	0.015	-0.18	0.11	-0.11	0.34
SPINT2	blue	-0.076	0.5	0.076	0.5	-0.33	0.0024	0.077	0.49	-0.21	0.054	0.17	0.12	0.071	0.52	-0.27	0.012	-0.11	0.32	-0.38	0.00038	-0.1	0.36
RUSC2	blue	0.3	0.0065	-0.3	0.0065	0.23	0.034	-0.074	0.51	0.022	0.85	-0.055	0.62	0.0036	0.97	-0.031	0.78	0.13	0.25	0.47	6.6e-06	0.39	0.00027
SEPTIN8	blue	0.12	0.28	-0.12	0.28	-0.069	0.54	0.2	0.07	0.19	0.09	0.3	0.0064	0.073	0.51	-0.31	0.0041	-0.14	0.19	-0.21	0.058	0.02	0.86
ALDH18A1	blue	-0.081	0.47	0.081	0.47	0.097	0.39	0.026	0.82	-0.023	0.84	-0.15	0.19	-0.18	0.11	-0.09	0.42	-0.17	0.12	-0.13	0.26	-0.023	0.84
MRPS21	blue	0.15	0.18	-0.15	0.18	-0.28	0.0093	0.019	0.86	-0.097	0.38	0.16	0.15	0.12	0.29	-0.021	0.85	-0.093	0.4	-0.071	0.52	-0.043	0.7
ATP6V0E1	blue	-0.0083	0.94	0.0083	0.94	-0.029	0.79	0.1	0.36	0.015	0.89	0.019	0.87	0.087	0.44	0.039	0.73	-0.037	0.74	-0.13	0.23	0.1	0.37
SLC48A1	blue	-0.094	0.4	0.094	0.4	-0.22	0.045	-0.049	0.66	-0.16	0.15	0.055	0.62	0.016	0.88	-0.07	0.53	-0.11	0.34	-0.17	0.12	-0.092	0.41
BOLA3	blue	0.074	0.51	-0.074	0.51	-0.093	0.4	-0.17	0.12	-0.19	0.091	-0.3	0.0054	-0.14	0.21	0.11	0.32	0.054	0.63	0.2	0.071	0.076	0.5
MYL2	blue	0.26	0.018	-0.26	0.018	0.22	0.044	-0.21	0.059	-0.033	0.77	-0.21	0.053	-0.012	0.92	0.13	0.26	0.0069	0.95	0.8	1.3e-19	0.21	0.061
CCDC77	blue	-0.17	0.12	0.17	0.12	-0.16	0.15	0.21	0.057	0.052	0.64	-0.17	0.12	-0.08	0.47	0.069	0.53	-0.013	0.91	-0.22	0.043	-0.082	0.46
RNF157	blue	0.32	0.003	-0.32	0.003	0.19	0.081	0.049	0.66	0.17	0.13	-0.18	0.11	0.013	0.91	0.064	0.57	0.019	0.87	0.66	1.2e-11	0.52	4.2e-07
ARAP2	blue	-0.13	0.24	0.13	0.24	-0.063	0.57	0.32	0.0034	0.095	0.39	0.36	0.0009	0.1	0.35	-0.23	0.034	-0.14	0.21	-0.29	0.009	-0.096	0.39
TTN	blue	0.22	0.048	-0.22	0.048	0.3	0.0066	-0.14	0.2	0.037	0.74	-0.21	0.053	-0.062	0.58	0.091	0.41	-0.017	0.88	0.81	4.7e-20	0.21	0.06
SLC7A1	blue	-0.19	0.093	0.19	0.093	-0.1	0.36	0.24	0.03	0.0029	0.98	0.27	0.013	-0.068	0.54	-0.44	3.2e-05	-0.15	0.16	-0.33	0.0025	-0.25	0.021
DHX40	blue	-0.092	0.41	0.092	0.41	0.17	0.13	-0.15	0.18	-0.0018	0.99	-0.0021	0.99	-0.11	0.32	0.062	0.58	-0.089	0.43	0.14	0.22	-0.035	0.75
RCAN1	blue	0.093	0.41	-0.093	0.41	0.21	0.063	-0.068	0.54	0.025	0.82	0.019	0.86	-0.15	0.18	-0.081	0.46	0.21	0.061	0.22	0.045	0.11	0.34
CACNG6	blue	0.38	0.00047	-0.38	0.00047	0.18	0.095	-0.13	0.25	0.014	0.9	-0.22	0.045	-0.026	0.81	0.067	0.55	0.0088	0.94	0.87	4.6e-27	0.37	0.00068
PLXNB3	blue	-0.063	0.57	0.063	0.57	-0.074	0.51	-0.16	0.15	-0.2	0.068	-0.063	0.57	0.0074	0.95	0.089	0.42	0.039	0.73	-0.14	0.21	0.052	0.64
CDC42EP1	blue	-0.05	0.65	0.05	0.65	-0.11	0.33	0.26	0.017	0.038	0.73	0.026	0.81	-0.2	0.068	-0.41	0.00013	-0.18	0.11	-0.19	0.081	-0.054	0.63
LCN1	blue	0.31	0.0043	-0.31	0.0043	-0.0079	0.94	-0.16	0.16	-0.068	0.54	0.0018	0.99	0.14	0.22	0.013	0.91	0.01	0.93	0.43	4.1e-05	0.17	0.12
MAL2	blue	-0.099	0.37	0.099	0.37	-0.23	0.037	0.056	0.62	-0.071	0.52	0.43	5e-05	0.17	0.12	-0.27	0.015	-0.15	0.16	-0.42	8.5e-05	-0.19	0.08
MBD4	blue	-0.006	0.96	0.006	0.96	-0.077	0.49	0.11	0.34	0.1	0.36	0.046	0.68	0.064	0.57	-0.014	0.9	0.072	0.52	-0.14	0.21	0.13	0.25
SLCO5A1	blue	0.29	0.0073	-0.29	0.0073	0.29	0.0074	-0.12	0.28	0.099	0.37	-0.23	0.034	-0.078	0.49	0.12	0.3	0.03	0.79	0.82	5.2e-21	0.31	0.004
TRNT1	blue	0.23	0.04	-0.23	0.04	-0.035	0.75	0.068	0.54	0.079	0.48	-0.18	0.099	0.04	0.72	-0.046	0.68	0.0099	0.93	0.24	0.027	0.21	0.055
GLOD4	blue	-0.096	0.39	0.096	0.39	0.078	0.48	0.17	0.12	0.16	0.14	-0.086	0.44	-0.12	0.29	-0.13	0.24	-0.18	0.1	-0.098	0.38	-0.021	0.85
SLC39A9	blue	0.041	0.71	-0.041	0.71	0.014	0.9	0.041	0.72	-0.037	0.74	0.061	0.59	0.058	0.6	-0.0062	0.96	0.0035	0.98	-0.15	0.19	0.13	0.24
TRMO	blue	0.014	0.9	-0.014	0.9	-0.3	0.0063	0.1	0.35	-0.14	0.21	0.1	0.35	0.16	0.15	-0.12	0.29	-0.17	0.11	-0.11	0.34	-0.039	0.73
MYOG	blue	0.21	0.053	-0.21	0.053	0.26	0.017	-0.15	0.17	0.03	0.79	-0.22	0.046	-0.098	0.38	0.067	0.55	-0.033	0.76	0.76	1.3e-16	0.18	0.11
LATS1	blue	-0.14	0.22	0.14	0.22	-0.038	0.73	0.15	0.18	0.072	0.52	-0.0059	0.96	-0.073	0.51	-0.041	0.71	-0.004	0.97	-0.17	0.12	-0.075	0.5
ABRACL	blue	0.0031	0.98	-0.0031	0.98	-0.063	0.57	0.34	0.0014	0.19	0.078	0.085	0.44	0.093	0.4	-0.12	0.27	0.016	0.88	-0.13	0.24	0.09	0.42
CARD10	blue	-0.061	0.58	0.061	0.58	-0.077	0.49	0.19	0.084	-0.071	0.52	0.073	0.51	-0.3	0.0053	-0.39	0.00024	-0.07	0.53	-0.19	0.081	-0.17	0.11
SNTA1	blue	0.24	0.026	-0.24	0.026	0.13	0.24	-0.055	0.62	0.032	0.77	-0.2	0.067	-0.11	0.31	0.093	0.4	-0.0072	0.95	0.52	4e-07	0.39	0.00025
MRPL9	blue	0.03	0.79	-0.03	0.79	-0.11	0.34	0.12	0.26	0.036	0.75	0.037	0.74	-0.079	0.48	-0.14	0.19	-0.016	0.89	-0.17	0.12	-0.032	0.78
PROB1	blue	-0.0095	0.93	0.0095	0.93	0.11	0.31	0.24	0.029	0.2	0.073	0.13	0.22	-0.061	0.58	-0.13	0.22	-0.066	0.56	0.27	0.015	0.043	0.7
SNX7	blue	0.047	0.67	-0.047	0.67	0.068	0.54	0.22	0.041	0.11	0.32	0.019	0.86	-0.075	0.5	-0.27	0.015	-0.096	0.39	0.12	0.28	0.039	0.73
HYAL3	blue	0.091	0.41	-0.091	0.41	-0.25	0.021	-0.083	0.45	-0.12	0.3	0.06	0.59	0.15	0.19	0.033	0.76	-0.12	0.26	-0.18	0.11	0.012	0.92
ARSA	blue	-0.09	0.42	0.09	0.42	0.042	0.71	0.21	0.056	0.18	0.098	0.028	0.8	-0.041	0.71	-0.18	0.096	-0.13	0.25	-0.16	0.16	0.12	0.26
POLI	blue	0.21	0.062	-0.21	0.062	0.081	0.47	0.095	0.39	0.057	0.61	-0.056	0.62	-0.0094	0.93	-0.15	0.19	-0.038	0.74	0.28	0.011	0.26	0.017
SELE	blue	0.38	0.00035	-0.38	0.00035	0.27	0.012	0.068	0.54	0.37	0.00062	-0.037	0.74	0.17	0.14	0.075	0.5	0.16	0.15	0.57	1.7e-08	0.56	2.8e-08
GJB5	blue	-0.41	0.00011	0.41	0.00011	-0.38	0.00037	0.16	0.14	-0.15	0.17	0.4	0.00021	-0.03	0.79	-0.33	0.0022	-0.31	0.0047	-0.58	1e-08	-0.58	7.7e-09
FGF13	blue	0.12	0.29	-0.12	0.29	0.16	0.15	-0.44	2.7e-05	-0.2	0.074	-0.34	0.0016	0.029	0.79	0.53	2e-07	0.036	0.75	0.51	7.9e-07	0.29	0.0071
POLR1B	blue	0.0097	0.93	-0.0097	0.93	-0.16	0.14	0.13	0.25	0.0076	0.95	0.058	0.6	-0.035	0.75	-0.17	0.11	-0.16	0.14	-0.13	0.24	-0.076	0.5
ARMC10	blue	0.019	0.86	-0.019	0.86	-0.087	0.43	0.015	0.89	-0.076	0.49	-0.16	0.14	0.025	0.82	0.055	0.62	-0.073	0.51	-0.12	0.28	0.13	0.26
CEP164	blue	-0.15	0.18	0.15	0.18	0.042	0.7	0.31	0.0049	0.19	0.091	0.15	0.19	-0.2	0.07	-0.34	0.0015	-0.079	0.48	-0.19	0.088	-0.12	0.27
C12orf73	blue	0.15	0.19	-0.15	0.19	-0.07	0.53	0.032	0.78	-0.041	0.71	-0.29	0.0084	-0.049	0.66	0.1	0.37	-0.032	0.77	0.28	0.0097	0.23	0.04
ZNF608	blue	0.28	0.011	-0.28	0.011	0.23	0.037	0.11	0.32	0.15	0.17	-0.021	0.85	-0.039	0.72	-0.17	0.12	0.17	0.12	0.42	6.7e-05	0.37	0.0005
TSPAN10	blue	-0.28	0.012	0.28	0.012	-0.077	0.49	0.25	0.024	0.11	0.31	0.13	0.24	-0.17	0.13	-0.27	0.014	-0.2	0.068	-0.25	0.023	-0.11	0.32
ADSS2	blue	0.069	0.53	-0.069	0.53	-0.32	0.0034	0.07	0.53	-0.076	0.49	0.074	0.5	0.16	0.16	-0.023	0.83	-0.018	0.87	-0.31	0.0046	-0.016	0.89
AMPD1	blue	0.43	4.8e-05	-0.43	4.8e-05	0.15	0.16	-0.12	0.28	0.05	0.65	-0.25	0.025	0.057	0.61	0.12	0.26	0.061	0.59	0.88	1e-27	0.47	9.3e-06
SH2D3A	blue	-0.19	0.091	0.19	0.091	-0.24	0.026	0.2	0.071	-0.041	0.71	0.18	0.1	-0.14	0.19	-0.33	0.0022	-0.2	0.065	-0.4	0.0002	-0.25	0.02
DNAJB12	blue	0.019	0.87	-0.019	0.87	-0.024	0.83	0.18	0.1	0.093	0.41	-0.033	0.76	-0.093	0.4	-0.18	0.097	-0.017	0.88	-0.13	0.25	0.14	0.22
LRRC20	blue	0.15	0.19	-0.15	0.19	0.0044	0.97	0.013	0.91	0.012	0.92	0.23	0.04	0.16	0.16	-0.1	0.36	-0.063	0.57	0.26	0.016	0.13	0.23
JMJD6	blue	-0.11	0.34	0.11	0.34	-0.032	0.77	0.037	0.74	-0.077	0.49	-0.12	0.29	-0.15	0.18	-0.034	0.76	-0.15	0.19	0.1	0.37	-0.067	0.55
UTP14A	blue	-0.13	0.25	0.13	0.25	-0.18	0.1	0.28	0.012	0.088	0.43	-0.023	0.83	-0.21	0.052	-0.3	0.0052	-0.24	0.032	-0.27	0.012	-0.15	0.17
KRT18	blue	-0.11	0.32	0.11	0.32	-0.23	0.04	0.014	0.9	-0.12	0.28	-0.093	0.4	0.0054	0.96	0.062	0.58	-0.15	0.17	-0.24	0.031	0.067	0.55
COX5A	blue	0.11	0.32	-0.11	0.32	-0.0003	1	0.014	0.9	-0.033	0.77	0.019	0.86	0.045	0.69	-0.0017	0.99	0.0026	0.98	0.22	0.042	0.17	0.12
CD47	blue	-0.1	0.36	0.1	0.36	-0.021	0.85	0.34	0.0015	0.13	0.23	0.016	0.89	-0.22	0.046	-0.4	0.00018	-0.083	0.46	-0.19	0.087	-0.045	0.69
IP6K3	blue	0.15	0.18	-0.15	0.18	0.29	0.0083	-0.082	0.46	0.0043	0.97	-0.3	0.0055	-0.17	0.13	0.095	0.39	-0.025	0.82	0.71	4e-14	0.25	0.021
TATDN2	blue	0.017	0.88	-0.017	0.88	-0.12	0.3	0.12	0.29	-0.015	0.89	0.18	0.11	0.13	0.25	-0.15	0.17	-0.13	0.24	-0.23	0.035	-4.8e-05	1
MBTPS1	blue	-0.12	0.27	0.12	0.27	0.075	0.5	0.044	0.7	0.04	0.72	-0.051	0.65	-0.11	0.32	-0.036	0.75	-0.14	0.2	-0.2	0.068	-0.018	0.88
ORAI2	blue	0.04	0.72	-0.04	0.72	0.33	0.002	0.064	0.56	0.15	0.17	-0.15	0.17	-0.15	0.18	0.0097	0.93	0.096	0.39	0.26	0.015	0.23	0.037
FADS3	blue	-0.11	0.32	0.11	0.32	0.11	0.31	0.22	0.048	0.064	0.57	-0.3	0.0064	-0.42	6.7e-05	-0.19	0.092	-0.2	0.074	0.23	0.033	0.013	0.91
CCDC93	blue	0.052	0.64	-0.052	0.64	-0.3	0.0068	0.093	0.4	-0.046	0.68	0.17	0.12	0.022	0.85	-0.24	0.032	-0.14	0.2	-0.22	0.043	-0.027	0.81
TRIM31	blue	-0.075	0.5	0.075	0.5	-0.15	0.16	0.28	0.0095	0.14	0.21	0.14	0.21	0.12	0.29	-0.18	0.1	-0.035	0.76	-0.14	0.19	0.019	0.86
GALE	blue	0.078	0.48	-0.078	0.48	-0.17	0.13	0.12	0.29	-0.027	0.81	0.068	0.54	0.071	0.52	-0.21	0.056	-0.069	0.53	-0.17	0.12	0.14	0.19
STX4	blue	0.028	0.8	-0.028	0.8	-0.16	0.16	0.058	0.6	-0.041	0.71	0.028	0.8	0.058	0.6	-0.049	0.66	-0.033	0.77	0.073	0.51	0.03	0.79
SLC25A30	blue	0.068	0.54	-0.068	0.54	0.11	0.3	0.26	0.016	0.18	0.11	-0.061	0.59	-0.24	0.031	-0.38	0.00041	-0.068	0.54	0.13	0.24	0.11	0.31
DIMT1	blue	0.13	0.24	-0.13	0.24	0.086	0.44	0.24	0.026	0.23	0.034	0.067	0.55	0.032	0.77	-0.31	0.0044	-0.018	0.87	0.17	0.12	0.19	0.09
SNX17	blue	0.17	0.13	-0.17	0.13	-0.18	0.095	-0.00051	1	0.025	0.82	-0.018	0.87	0.097	0.38	-0.088	0.43	-0.12	0.3	-0.0097	0.93	0.028	0.8
DOK7	blue	0.19	0.081	-0.19	0.081	0.14	0.22	-0.15	0.18	-0.075	0.5	-0.35	0.0011	-0.1	0.37	0.18	0.1	0.068	0.54	0.64	6.6e-11	0.23	0.035
GOLIM4	blue	-0.14	0.22	0.14	0.22	0.29	0.0083	-0.06	0.59	0.003	0.98	-0.086	0.44	-0.15	0.17	-0.0037	0.97	-0.17	0.11	0.16	0.15	-0.069	0.54
MPV17L2	blue	-0.086	0.44	0.086	0.44	-0.14	0.21	0.1	0.36	-0.057	0.61	0.019	0.86	-0.1	0.35	-0.17	0.12	-0.13	0.24	-0.17	0.12	-0.032	0.78
OPTN	blue	0.029	0.79	-0.029	0.79	0.0035	0.97	0.23	0.035	0.035	0.75	0.19	0.079	-0.056	0.61	-0.28	0.012	0.036	0.75	0.12	0.29	0.15	0.19
DNAJC27	blue	0.29	0.0085	-0.29	0.0085	0.082	0.46	-0.12	0.26	-0.07	0.53	-0.2	0.067	0.13	0.22	0.17	0.13	0.066	0.55	0.49	2.6e-06	0.39	0.00032
HNRNPAB	blue	-0.0052	0.96	0.0052	0.96	-0.17	0.12	0.32	0.0028	0.16	0.15	0.015	0.89	-0.14	0.21	-0.36	0.00082	-0.11	0.34	-0.2	0.064	-0.054	0.63
TBC1D7	blue	-0.064	0.57	0.064	0.57	-0.089	0.43	0.037	0.74	0.019	0.86	-0.1	0.35	-0.028	0.8	0.035	0.75	-0.12	0.27	-0.098	0.38	0.092	0.41
ZBTB7A	blue	0.0032	0.98	-0.0032	0.98	-0.19	0.079	0.26	0.02	-0.0037	0.97	0.17	0.12	0.041	0.71	-0.36	0.00092	-0.23	0.034	-0.19	0.092	-0.13	0.23
EIF1AD	blue	-0.17	0.12	0.17	0.12	-0.19	0.085	-0.042	0.71	-0.21	0.052	-0.03	0.78	-0.13	0.26	-0.025	0.82	-0.21	0.051	-0.18	0.095	-0.15	0.17
ATP6V1G1	blue	0.037	0.74	-0.037	0.74	-0.21	0.058	0.12	0.29	-0.034	0.76	0.077	0.49	0.065	0.56	-0.21	0.063	-0.17	0.13	-0.12	0.29	-0.015	0.89
CKMT1B	blue	0.016	0.88	-0.016	0.88	-0.3	0.0055	0.19	0.086	0.0071	0.95	0.27	0.012	0.1	0.35	-0.26	0.016	0.063	0.57	-0.27	0.013	0.0065	0.95
AMACR	blue	0.3	0.0063	-0.3	0.0063	0.062	0.58	-0.029	0.79	-0.044	0.69	-0.0086	0.94	0.06	0.59	-0.094	0.4	0.093	0.4	0.35	0.001	0.27	0.014
PUM1	blue	0.15	0.18	-0.15	0.18	0.077	0.49	0.078	0.48	-0.034	0.76	-0.022	0.84	-0.065	0.56	-0.18	0.11	-0.028	0.8	0.29	0.0077	0.19	0.078
PRUNE1	blue	-0.16	0.15	0.16	0.15	-0.089	0.43	0.19	0.077	0.076	0.49	-0.051	0.65	0.03	0.79	-0.052	0.64	-0.011	0.92	-0.13	0.24	-0.046	0.68
C19orf57	blue	-0.012	0.92	0.012	0.92	-0.21	0.053	0.19	0.08	0.021	0.85	0.12	0.29	0.21	0.053	-0.11	0.32	-0.029	0.79	-0.2	0.075	0.032	0.77
ARHGAP1	blue	-0.14	0.21	0.14	0.21	0.047	0.68	0.33	0.0023	0.3	0.0054	0.097	0.38	-0.11	0.32	-0.34	0.0016	-0.18	0.1	-0.17	0.12	0.00032	1
SH3D21	blue	-0.079	0.48	0.079	0.48	-0.17	0.13	0.2	0.068	0.083	0.45	0.4	0.00022	0.042	0.71	-0.29	0.0073	0.038	0.73	-0.28	0.0098	-0.042	0.7
ABI3BP	blue	0.43	5.7e-05	-0.43	5.7e-05	0.45	1.6e-05	-0.095	0.39	0.25	0.024	-0.3	0.0067	0.047	0.67	0.16	0.15	0.34	0.0018	0.64	6.2e-11	0.7	2.2e-13
RRAGC	blue	-0.1	0.35	0.1	0.35	-0.13	0.24	-0.032	0.77	-0.22	0.05	0.22	0.043	0.039	0.72	-0.19	0.08	-0.077	0.49	-0.3	0.0061	-0.084	0.45
COA6	blue	-0.27	0.014	0.27	0.014	-0.24	0.026	-0.025	0.82	-0.14	0.21	-0.14	0.21	-0.0056	0.96	0.076	0.49	-0.23	0.033	-0.25	0.024	-0.16	0.15
SLC29A1	blue	-0.013	0.91	0.013	0.91	0.18	0.1	0.14	0.22	0.11	0.31	-0.2	0.066	-0.26	0.019	-0.17	0.13	-0.012	0.92	0.21	0.059	0.081	0.47
ZMIZ2	blue	-0.17	0.12	0.17	0.12	-0.092	0.41	0.17	0.12	0.082	0.46	-0.06	0.59	-0.19	0.09	-0.071	0.52	-0.16	0.15	-0.24	0.032	-0.023	0.84
POLR1C	blue	0.061	0.58	-0.061	0.58	-0.37	0.00058	0.01	0.93	-0.13	0.23	0.015	0.89	0.24	0.031	-0.1	0.37	-0.0009	0.99	-0.18	0.11	0.13	0.23
DUSP19	blue	0.0076	0.95	-0.0076	0.95	0.12	0.28	-0.18	0.1	-0.13	0.22	-0.072	0.52	-0.029	0.8	0.2	0.069	0.086	0.44	0.17	0.14	0.18	0.11
SLC2A5	blue	0.1	0.36	-0.1	0.36	0.37	0.00049	0.14	0.22	0.39	0.0003	-0.095	0.39	-0.065	0.56	-0.11	0.34	-0.052	0.64	0.48	4.7e-06	0.29	0.0084
MVB12A	blue	0.027	0.81	-0.027	0.81	-0.15	0.19	-0.026	0.82	-0.021	0.85	0.14	0.22	0.17	0.13	0.047	0.67	-0.046	0.68	-0.17	0.13	0.058	0.6
RPS8	blue	0.22	0.047	-0.22	0.047	-0.21	0.052	-0.013	0.91	-0.063	0.57	0.1	0.37	0.22	0.048	-0.067	0.55	0.032	0.78	-0.14	0.22	0.038	0.73
VPS13D	blue	0.067	0.55	-0.067	0.55	0.014	0.9	0.16	0.16	0.038	0.74	0.092	0.41	0.07	0.53	-0.25	0.021	-0.0071	0.95	0.15	0.18	0.091	0.41
L2HGDH	blue	0.074	0.5	-0.074	0.5	-0.23	0.033	-0.14	0.22	-0.22	0.042	0.01	0.93	0.05	0.65	-0.013	0.91	-0.081	0.47	-0.0071	0.95	-0.016	0.88
AP5B1	blue	0.082	0.46	-0.082	0.46	-0.36	0.00081	0.14	0.21	-0.13	0.25	0.27	0.013	0.058	0.6	-0.28	0.011	0.038	0.73	-0.29	0.0073	-0.12	0.26
FAM193B	blue	-0.079	0.48	0.079	0.48	-0.16	0.16	0.18	0.098	0.0026	0.98	0.095	0.39	-0.034	0.76	-0.11	0.34	0.07	0.53	-0.22	0.044	0.00048	1
DPP8	blue	0.045	0.68	-0.045	0.68	0.12	0.3	0.12	0.29	0.021	0.85	-0.097	0.38	-0.026	0.82	-0.17	0.12	0.09	0.42	0.25	0.02	0.2	0.071
NCKAP5L	blue	-0.009	0.94	0.009	0.94	0.25	0.025	0.034	0.76	0.07	0.53	-0.3	0.0051	-0.21	0.063	-0.03	0.79	0.039	0.73	0.25	0.024	0.25	0.023
EIF4EBP2	blue	0.13	0.23	-0.13	0.23	0.029	0.79	0.086	0.44	0.082	0.46	0.11	0.32	0.11	0.31	-0.2	0.072	-0.079	0.48	0.24	0.031	0.24	0.032
PCNT	blue	-0.081	0.47	0.081	0.47	-0.00024	1	0.27	0.014	0.098	0.38	-0.049	0.66	-0.13	0.25	-0.25	0.021	-0.16	0.16	0.17	0.14	-0.044	0.69
CD99L2	blue	0.13	0.23	-0.13	0.23	0.32	0.0028	0.17	0.12	0.27	0.012	-0.16	0.15	-0.18	0.095	-0.18	0.096	0.011	0.92	0.35	0.0012	0.29	0.0077
PEX5	blue	-0.089	0.42	0.089	0.42	0.13	0.25	0.055	0.62	-0.03	0.79	-0.15	0.18	-0.14	0.22	-0.03	0.79	-0.12	0.29	0.16	0.15	0.069	0.54
GNB1	blue	0.023	0.84	-0.023	0.84	0.018	0.88	-0.068	0.54	-0.016	0.89	0.039	0.72	0.11	0.34	0.14	0.19	0.28	0.011	-0.16	0.16	0.12	0.28
VWA8	blue	0.1	0.36	-0.1	0.36	-0.013	0.9	0.0091	0.93	-0.082	0.46	0.044	0.69	0.0083	0.94	-0.19	0.086	0.0032	0.98	0.27	0.014	0.12	0.28
MYH8	blue	0.2	0.075	-0.2	0.075	0.3	0.0058	-0.13	0.24	0.028	0.8	-0.31	0.0046	-0.13	0.24	0.096	0.39	-0.022	0.84	0.83	1.8e-22	0.21	0.053
INKA1	blue	0.022	0.85	-0.022	0.85	-0.28	0.01	0.045	0.69	-0.15	0.17	0.15	0.17	0.17	0.12	-0.081	0.47	-0.016	0.89	-0.18	0.11	-0.032	0.77
PAK1IP1	blue	0.015	0.89	-0.015	0.89	-0.17	0.13	-0.081	0.46	-0.23	0.041	-0.065	0.56	0.0046	0.97	-0.12	0.29	-0.02	0.86	-0.14	0.2	-0.15	0.18
FOXRED1	blue	0.082	0.46	-0.082	0.46	-0.23	0.036	0.042	0.71	-0.11	0.32	-0.052	0.64	-0.023	0.84	-0.11	0.31	-0.056	0.62	-0.016	0.88	0.064	0.57
SLC25A12	blue	0.19	0.093	-0.19	0.093	0.04	0.72	0.021	0.85	0.014	0.9	-0.15	0.18	0.06	0.59	-0.087	0.44	-0.11	0.34	0.31	0.004	0.28	0.01
H2AC8	blue	-0.25	0.023	0.25	0.023	-0.062	0.57	-0.048	0.67	-0.073	0.51	0.031	0.78	-0.065	0.56	0.14	0.21	-0.14	0.21	-0.19	0.08	-0.14	0.2
CCN5	blue	0.18	0.098	-0.18	0.098	0.53	2.1e-07	-0.022	0.84	0.29	0.0069	-0.3	0.0052	-0.061	0.59	0.23	0.036	0.28	0.011	0.49	2.5e-06	0.52	6.2e-07
PBLD	blue	0.13	0.24	-0.13	0.24	0.17	0.12	0.12	0.28	0.12	0.29	-0.3	0.0052	-0.13	0.24	0.0058	0.96	0.13	0.26	0.43	4.3e-05	0.35	0.0013
FITM1	blue	0.41	0.0001	-0.41	0.0001	0.1	0.35	-0.14	0.2	-0.022	0.84	-0.22	0.044	0.058	0.6	0.092	0.41	0.09	0.42	0.86	1.9e-25	0.37	0.00051
COQ2	blue	0.16	0.15	-0.16	0.15	-0.25	0.024	0.038	0.73	-0.05	0.65	-0.038	0.73	0.032	0.77	-0.12	0.29	-0.074	0.51	0.17	0.13	0.18	0.1
ATP2B1	blue	-0.22	0.041	0.22	0.041	0.18	0.095	0.11	0.33	0.028	0.8	-0.13	0.24	-0.22	0.05	-0.0068	0.95	-0.14	0.22	0.15	0.19	-0.032	0.78
ANKRD2	blue	0.35	0.0012	-0.35	0.0012	0.062	0.58	-0.23	0.034	-0.07	0.53	-0.2	0.071	0.044	0.69	0.14	0.21	0.037	0.74	0.72	1.1e-14	0.31	0.0047
ITGA9	blue	0.25	0.023	-0.25	0.023	0.39	0.00023	0.15	0.19	0.38	0.00047	-0.16	0.16	0.0049	0.97	-0.091	0.41	0.0097	0.93	0.45	1.6e-05	0.44	2.7e-05
EPHA3	blue	0.0066	0.95	-0.0066	0.95	0.56	4.1e-08	0.11	0.34	0.41	0.00012	-0.3	0.0066	-0.14	0.2	0.097	0.39	-0.0057	0.96	0.52	4.4e-07	0.28	0.0098
METTL18	blue	0.036	0.75	-0.036	0.75	-0.18	0.11	0.24	0.029	0.13	0.23	-0.09	0.42	0.045	0.68	-0.15	0.17	-0.093	0.4	-0.13	0.24	0.1	0.35
EPS8	blue	0.024	0.83	-0.024	0.83	0.4	0.00015	0.031	0.78	0.22	0.047	-0.23	0.041	-0.059	0.59	0.041	0.71	0.052	0.64	0.32	0.0033	0.29	0.0085
EEF2KMT	blue	-0.17	0.13	0.17	0.13	-0.063	0.57	-0.019	0.87	-0.06	0.59	-0.14	0.2	-0.12	0.26	0.09	0.42	-0.025	0.82	-0.17	0.13	-0.034	0.76
RAB28	blue	0.12	0.28	-0.12	0.28	-0.019	0.87	-0.022	0.84	-0.071	0.52	0.12	0.26	0.18	0.11	-0.019	0.86	-0.13	0.23	0.15	0.19	0.091	0.41
TSPAN3	blue	0.18	0.095	-0.18	0.095	0.046	0.68	-0.032	0.77	0.0033	0.98	0.019	0.86	0.13	0.23	0.081	0.47	-0.023	0.84	0.3	0.0055	0.31	0.0041
GSDMB	blue	-0.2	0.071	0.2	0.071	-0.18	0.11	0.31	0.0049	0.1	0.36	0.032	0.77	-0.02	0.86	-0.11	0.34	-0.05	0.65	-0.21	0.056	-0.019	0.86
PLK3	blue	0.17	0.13	-0.17	0.13	-0.076	0.49	0.027	0.81	0.054	0.63	-0.042	0.71	0.039	0.72	-0.15	0.18	-0.075	0.5	0.2	0.073	0.12	0.27
RIPK4	blue	0.12	0.29	-0.12	0.29	-0.31	0.005	-0.025	0.82	-0.2	0.075	0.34	0.0016	0.3	0.0058	-0.23	0.034	-0.041	0.71	-0.31	0.0043	0.063	0.57
CDC73	blue	-0.14	0.2	0.14	0.2	0.091	0.41	0.28	0.0098	0.19	0.078	0.11	0.32	-0.065	0.56	-0.27	0.013	-0.15	0.19	-0.14	0.2	-0.034	0.76
GSTT2B	blue	0.15	0.18	-0.15	0.18	0.12	0.29	-0.18	0.11	-0.093	0.4	-0.14	0.22	0.056	0.61	0.22	0.048	0.017	0.88	0.46	1.4e-05	0.23	0.033
FEM1B	blue	-0.11	0.33	0.11	0.33	0.032	0.77	0.21	0.056	0.11	0.32	0.22	0.042	0.01	0.93	-0.29	0.0079	-0.12	0.27	-0.13	0.23	0.044	0.69
RPS14	blue	0.016	0.88	-0.016	0.88	-0.21	0.057	0.14	0.2	0.01	0.93	0.066	0.56	-0.0054	0.96	-0.23	0.037	-0.078	0.48	-0.12	0.29	0.032	0.77
TSPAN7	blue	0.074	0.5	-0.074	0.5	0.12	0.29	-0.24	0.029	-0.16	0.14	-0.14	0.21	0.05	0.65	0.22	0.047	0.083	0.46	0.37	0.0005	0.14	0.22
TIMM44	blue	0.15	0.17	-0.15	0.17	-0.28	0.012	-0.0085	0.94	-0.12	0.29	-0.058	0.6	0.058	0.6	-0.019	0.87	-0.02	0.86	0.12	0.28	0.12	0.26
ME2	blue	0.012	0.91	-0.012	0.91	-0.0027	0.98	0.2	0.074	0.12	0.29	-0.035	0.76	-0.093	0.4	-0.25	0.025	-0.13	0.23	-0.14	0.21	0.16	0.14
NGDN	blue	0.095	0.39	-0.095	0.39	-0.17	0.12	0.044	0.69	-0.041	0.71	-0.14	0.22	-0.015	0.89	-0.032	0.78	-0.015	0.89	-0.11	0.34	0.028	0.8
NUP214	blue	-0.084	0.45	0.084	0.45	-0.02	0.85	0.35	0.0011	0.22	0.044	-0.12	0.28	-0.25	0.02	-0.32	0.0034	-0.069	0.54	-0.16	0.15	-0.054	0.63
KLHL29	blue	0.094	0.4	-0.094	0.4	0.21	0.054	-0.06	0.59	0.14	0.2	-0.27	0.013	-0.035	0.75	0.21	0.054	-0.019	0.86	0.34	0.0017	0.32	0.0028
ABLIM2	blue	0.21	0.062	-0.21	0.062	0.033	0.77	-0.073	0.51	-0.048	0.67	0.061	0.59	0.17	0.13	-0.09	0.42	-0.13	0.23	0.46	9.9e-06	0.18	0.099
POLR3K	blue	-0.035	0.75	0.035	0.75	-0.33	0.0023	0.038	0.73	-0.16	0.15	-0.16	0.15	-0.14	0.21	-0.014	0.9	-0.0051	0.96	-0.23	0.037	-0.058	0.6
MZT2B	blue	-0.057	0.61	0.057	0.61	-0.2	0.071	-0.049	0.66	-0.12	0.27	0.012	0.92	0.056	0.61	0.051	0.64	-0.031	0.78	-0.2	0.075	-0.0037	0.97
DAAM1	blue	-0.016	0.88	0.016	0.88	-0.092	0.41	0.12	0.28	0.0043	0.97	0.29	0.0074	0.056	0.61	-0.21	0.053	-0.042	0.71	-0.24	0.026	-0.038	0.73
SENP2	blue	-0.064	0.56	0.064	0.56	-0.028	0.8	-0.11	0.32	-0.15	0.18	-0.16	0.14	-0.013	0.91	0.13	0.23	0.067	0.55	0.075	0.5	0.047	0.68
RSRC1	blue	-0.071	0.52	0.071	0.52	-0.065	0.56	-0.023	0.84	-0.14	0.21	-0.1	0.36	0.024	0.83	0.089	0.42	-0.048	0.66	0.18	0.11	0.033	0.76
OBI1	blue	-0.2	0.067	0.2	0.067	0.022	0.85	0.088	0.43	-0.047	0.67	-0.2	0.077	-0.25	0.023	-0.12	0.26	0.028	0.8	-0.16	0.15	-0.041	0.71
RCCD1	blue	-0.14	0.22	0.14	0.22	-0.015	0.89	0.28	0.0095	0.18	0.11	-0.14	0.2	-0.17	0.13	-0.093	0.4	0.05	0.65	-0.17	0.11	-0.06	0.59
CCND3	blue	0.094	0.4	-0.094	0.4	-0.0084	0.94	0.15	0.17	0.14	0.19	-0.12	0.27	-0.1	0.36	-0.15	0.18	0.13	0.23	0.1	0.37	0.12	0.29
DNMT1	blue	-0.25	0.023	0.25	0.023	-0.081	0.46	0.35	0.0011	0.062	0.58	-0.0088	0.94	-0.24	0.027	-0.35	0.0012	-0.25	0.023	-0.32	0.003	-0.28	0.01
H2AW	blue	-0.095	0.4	0.095	0.4	-0.23	0.036	-0.19	0.085	-0.24	0.031	-0.041	0.71	0.14	0.22	0.35	0.0013	0.086	0.44	-0.14	0.2	-0.0029	0.98
TACO1	blue	0.12	0.28	-0.12	0.28	-0.17	0.12	-0.047	0.67	-0.11	0.3	-0.026	0.82	0.1	0.35	0.026	0.81	-0.061	0.58	0.25	0.024	0.11	0.32
RRM2B	blue	0.12	0.27	-0.12	0.27	0.24	0.032	0.21	0.055	0.22	0.045	-0.1	0.35	-0.12	0.27	-0.13	0.26	-0.094	0.4	0.23	0.034	0.23	0.038
ADGRG6	blue	0.26	0.02	-0.26	0.02	-0.2	0.071	-0.038	0.73	-0.14	0.22	0.11	0.34	0.18	0.1	-0.21	0.053	0.14	0.19	-0.18	0.098	0.095	0.39
PTK7	blue	-0.23	0.033	0.23	0.033	0.22	0.043	0.13	0.25	0.11	0.33	-0.018	0.87	-0.29	0.0069	-0.25	0.021	-0.12	0.26	-0.27	0.013	-0.086	0.44
CLCA2	blue	-0.46	1.4e-05	0.46	1.4e-05	-0.00013	1	0.37	0.00068	0.12	0.29	0.48	4e-06	-0.081	0.47	-0.42	8.4e-05	-0.17	0.12	-0.52	4.9e-07	-0.54	1.2e-07
SDCCAG8	blue	0.039	0.72	-0.039	0.72	0.11	0.34	-0.023	0.84	-0.0066	0.95	-0.21	0.055	-0.11	0.32	0.044	0.7	-0.13	0.26	0.18	0.095	0.19	0.087
PPT1	blue	-0.13	0.26	0.13	0.26	0.17	0.12	0.25	0.022	0.2	0.065	-0.18	0.11	-0.23	0.034	-0.17	0.13	0.054	0.63	-0.082	0.46	0.015	0.89
RPL3L	blue	0.24	0.027	-0.24	0.027	0.077	0.49	-0.14	0.2	-0.12	0.27	-0.14	0.2	-0.1	0.37	0.054	0.63	-0.0058	0.96	0.64	1.1e-10	0.22	0.044
PPP1R27	blue	0.22	0.045	-0.22	0.045	0.2	0.069	-0.12	0.27	-0.018	0.87	-0.2	0.073	-0.088	0.43	0.037	0.74	-0.036	0.75	0.74	8e-16	0.18	0.11
CCDC43	blue	0.16	0.15	-0.16	0.15	-0.033	0.77	0.27	0.014	0.1	0.35	-0.069	0.53	-0.12	0.27	-0.25	0.025	-0.1	0.37	0.14	0.22	0.11	0.32
EXOSC1	blue	-0.019	0.86	0.019	0.86	-0.15	0.18	0.23	0.033	0.1	0.36	0.08	0.47	-0.098	0.38	-0.27	0.015	-0.14	0.2	-0.22	0.049	-0.1	0.36
COL4A4	blue	0.22	0.049	-0.22	0.049	0.3	0.0051	-0.085	0.44	0.16	0.14	-0.18	0.1	-0.038	0.73	0.12	0.29	0.17	0.13	0.43	5.2e-05	0.31	0.0047
IQGAP1	blue	-0.081	0.47	0.081	0.47	0.082	0.46	0.27	0.015	0.2	0.07	0.05	0.65	-0.074	0.5	-0.27	0.015	-0.014	0.9	-0.16	0.14	0.053	0.63
KIFC2	blue	-0.069	0.53	0.069	0.53	-0.14	0.21	-0.091	0.41	-0.13	0.25	0.24	0.027	0.06	0.59	0.092	0.41	0.022	0.85	-0.23	0.04	-0.12	0.28
COL6A6	blue	0.18	0.1	-0.18	0.1	0.37	0.00069	0.02	0.86	0.23	0.036	-0.026	0.82	-0.061	0.59	0.0075	0.95	0.07	0.53	0.41	0.00013	0.38	0.00041
BRD8	blue	0.2	0.072	-0.2	0.072	-0.073	0.51	0.088	0.43	0.029	0.79	-0.12	0.29	0.15	0.18	0.057	0.61	0.027	0.81	0.25	0.024	0.2	0.066
ARAP1	blue	-0.18	0.099	0.18	0.099	-0.11	0.32	0.00023	1	-0.15	0.19	-0.002	0.99	-0.18	0.098	-0.21	0.059	-0.13	0.23	-0.22	0.042	-0.18	0.097
RRAD	blue	0.11	0.3	-0.11	0.3	0.061	0.58	-0.12	0.26	-0.022	0.85	0.1	0.36	0.057	0.61	0.039	0.73	-0.11	0.33	0.38	0.00043	-0.0034	0.98
ABHD13	blue	0.037	0.74	-0.037	0.74	0.14	0.2	0.18	0.11	0.17	0.12	0.19	0.086	0.094	0.4	-0.17	0.13	-0.0025	0.98	0.16	0.15	0.14	0.22
MAPT	blue	0.66	1e-11	-0.66	1e-11	0.035	0.75	-0.32	0.0032	-0.084	0.45	-0.18	0.095	0.28	0.0094	0.19	0.088	0.24	0.032	0.78	3.2e-18	0.65	3.5e-11
POPDC2	blue	0.47	7.7e-06	-0.47	7.7e-06	0.14	0.19	-0.1	0.36	0.066	0.55	-0.24	0.031	0.05	0.65	0.12	0.29	0.17	0.12	0.83	6e-22	0.49	2.3e-06
SSPN	blue	0.15	0.17	-0.15	0.17	0.47	9.2e-06	-0.019	0.86	0.11	0.3	-0.28	0.01	-0.13	0.25	0.12	0.28	0.082	0.46	0.57	1.8e-08	0.39	0.00031
MCCC2	blue	0.0032	0.98	-0.0032	0.98	-0.18	0.098	0.14	0.21	-0.041	0.71	-0.023	0.84	0.024	0.83	-0.11	0.32	0.054	0.63	-0.17	0.12	0.042	0.71
CDK11A	blue	-0.032	0.78	0.032	0.78	-0.13	0.24	0.035	0.75	-0.048	0.67	0.16	0.14	0.027	0.81	-0.066	0.56	-0.027	0.81	-0.16	0.16	0.0072	0.95
USP9Y	blue	0.18	0.098	-0.18	0.098	0.23	0.033	-0.049	0.66	0.097	0.38	-0.17	0.13	0.089	0.42	0.22	0.047	0.094	0.4	0.29	0.0072	0.31	0.0038
TRIM63	blue	0.33	0.0025	-0.33	0.0025	0.26	0.015	-0.18	0.097	-0.015	0.89	-0.18	0.1	-0.0095	0.93	0.094	0.4	0.06	0.59	0.87	3.2e-26	0.3	0.0058
MTLN	blue	0.27	0.014	-0.27	0.014	0.042	0.71	-0.25	0.024	-0.22	0.047	-0.17	0.12	0.07	0.53	0.21	0.056	0.094	0.4	0.36	0.0007	0.17	0.13
VEGFB	blue	0.075	0.5	-0.075	0.5	0.18	0.11	0.051	0.65	0.087	0.44	-0.26	0.019	-0.29	0.0068	-0.084	0.45	-0.097	0.38	0.32	0.0028	0.17	0.13
SENP5	blue	-0.11	0.31	0.11	0.31	-0.12	0.29	0.16	0.15	0.072	0.52	0.046	0.68	-0.064	0.57	-0.16	0.16	-0.11	0.32	-0.17	0.13	-0.052	0.64
TBCA	blue	0.052	0.64	-0.052	0.64	-0.15	0.18	0.16	0.15	-0.0023	0.98	0.086	0.44	0.02	0.85	-0.2	0.066	-0.13	0.25	-0.16	0.15	0.012	0.91
AP1G2	blue	-0.003	0.98	0.003	0.98	-0.18	0.1	0.23	0.037	0.08	0.47	0.18	0.11	0.027	0.81	-0.25	0.023	-0.12	0.28	-0.22	0.046	-0.031	0.78
WNT7B	blue	-0.5	1.2e-06	0.5	1.2e-06	-0.003	0.98	0.076	0.5	-0.13	0.23	0.14	0.22	-0.029	0.8	-0.0021	0.99	-0.15	0.17	-0.44	2.6e-05	-0.36	0.00091
EIF2B1	blue	-0.0047	0.97	0.0047	0.97	-0.21	0.057	0.051	0.65	-0.17	0.12	0.12	0.27	-0.013	0.91	-0.25	0.025	-0.04	0.72	-0.16	0.16	0.0081	0.94
ZNF205	blue	0.038	0.73	-0.038	0.73	-0.16	0.15	0.097	0.38	-0.038	0.73	0.063	0.57	-0.029	0.8	-0.0071	0.95	0.018	0.87	-0.094	0.4	0.049	0.66
PIR	blue	-0.13	0.23	0.13	0.23	-0.26	0.018	-0.19	0.079	-0.28	0.0096	0.16	0.16	0.29	0.0074	0.23	0.035	0.027	0.81	-0.21	0.057	-0.086	0.44
MITF	blue	0.4	0.00015	-0.4	0.00015	0.49	2.1e-06	-0.0069	0.95	0.27	0.012	-0.18	0.11	-0.075	0.5	0.0095	0.93	0.39	0.00029	0.67	5.1e-12	0.53	2.6e-07
MPHOSPH6	blue	0.059	0.6	-0.059	0.6	-0.27	0.013	0.16	0.15	-0.016	0.89	0.22	0.046	-0.018	0.87	-0.32	0.0036	-0.046	0.68	-0.35	0.00099	-0.055	0.62
CUL7	blue	0.11	0.32	-0.11	0.32	0.039	0.73	0.17	0.12	0.078	0.48	-0.1	0.36	-0.06	0.59	-0.11	0.33	-0.014	0.9	0.2	0.072	0.2	0.068
PPIA	blue	0.09	0.42	-0.09	0.42	-0.32	0.0029	0.08	0.47	-0.1	0.36	-0.0093	0.93	-0.0019	0.99	-0.2	0.075	-0.086	0.44	-0.2	0.074	0.04	0.72
TBCEL	blue	0.17	0.13	-0.17	0.13	0.2	0.065	0.053	0.63	0.12	0.29	0.19	0.088	0.062	0.58	-0.17	0.13	0.061	0.59	0.27	0.015	0.2	0.066
DLGAP4	blue	-0.26	0.018	0.26	0.018	0.28	0.011	0.16	0.16	0.12	0.29	-0.0087	0.94	-0.31	0.0044	-0.11	0.31	-0.2	0.077	0.13	0.23	-0.044	0.69
OTULIN	blue	-0.077	0.49	0.077	0.49	-0.053	0.63	0.16	0.14	0.054	0.63	0.093	0.4	0.0095	0.93	-0.2	0.077	-0.12	0.26	-0.19	0.087	-0.087	0.43
CBFA2T2	blue	-0.073	0.51	0.073	0.51	-0.074	0.5	-0.013	0.91	-0.087	0.43	-0.1	0.37	-0.13	0.23	-0.0087	0.94	0.072	0.52	-0.15	0.17	0.075	0.5
MRPL22	blue	-0.019	0.87	0.019	0.87	-0.29	0.0069	0.13	0.23	-0.041	0.71	0.034	0.76	0.056	0.62	-0.14	0.22	-0.018	0.87	-0.2	0.064	-0.098	0.38
CHRNA1	blue	-0.011	0.92	0.011	0.92	0.38	0.00045	-0.026	0.81	0.12	0.28	-0.21	0.057	-0.24	0.026	-0.057	0.61	-0.073	0.51	0.56	4.6e-08	0.032	0.77
UTP20	blue	0.032	0.77	-0.032	0.77	-0.072	0.52	0.06	0.59	-0.074	0.51	-0.1	0.36	-0.11	0.33	-0.23	0.04	-0.11	0.34	0.11	0.31	0.031	0.78
ADAMTSL4	blue	0.12	0.27	-0.12	0.27	-0.068	0.54	0.14	0.19	0.14	0.22	0.23	0.037	0.063	0.57	-0.34	0.0019	-0.046	0.68	0.17	0.12	0.064	0.56
SMYD1	blue	0.32	0.0033	-0.32	0.0033	0.26	0.016	-0.12	0.28	0.089	0.42	-0.23	0.035	-0.033	0.76	0.068	0.54	0.019	0.86	0.83	1.6e-22	0.3	0.0054
NAPRT	blue	-0.095	0.39	0.095	0.39	-0.17	0.12	-0.098	0.38	-0.21	0.063	0.22	0.05	0.1	0.36	0.0014	0.99	-0.09	0.42	-0.27	0.015	-0.17	0.13
PDRG1	blue	-0.061	0.59	0.061	0.59	-0.13	0.25	-0.16	0.14	-0.24	0.029	0.018	0.87	0.027	0.81	0.048	0.67	-0.049	0.66	-0.13	0.22	0.0037	0.97
UNC119	blue	-0.091	0.41	0.091	0.41	0.052	0.64	0.073	0.51	0.095	0.39	-0.068	0.54	-0.043	0.7	0.16	0.15	-0.077	0.49	-0.1	0.37	0.043	0.7
STARD9	blue	-0.032	0.78	0.032	0.78	0.24	0.03	0.087	0.43	0.14	0.2	-0.1	0.36	-0.19	0.082	-0.1	0.36	-0.033	0.77	0.28	0.012	0.13	0.23
BUD31	blue	-0.061	0.58	0.061	0.58	-0.17	0.13	0.037	0.74	-0.083	0.46	0.036	0.75	0.061	0.58	-0.12	0.29	-0.16	0.15	-0.2	0.066	-0.14	0.2
FAM160A1	blue	-0.22	0.042	0.22	0.042	-0.13	0.24	0.22	0.046	-0.045	0.69	0.25	0.024	-0.052	0.64	-0.35	0.0012	-0.16	0.14	-0.28	0.011	-0.25	0.021
EIF3D	blue	0.091	0.41	-0.091	0.41	-0.19	0.079	0.14	0.19	0.11	0.31	0.17	0.14	0.071	0.52	-0.17	0.12	-0.11	0.31	-0.22	0.047	-0.014	0.9
ADAMTS9	blue	0.23	0.038	-0.23	0.038	0.53	2.6e-07	0.073	0.51	0.39	0.00031	-0.11	0.31	-0.12	0.27	-0.062	0.58	0.07	0.53	0.61	6.9e-10	0.42	9.3e-05
BTG2	blue	0.25	0.021	-0.25	0.021	0.19	0.079	-0.12	0.28	0.01	0.93	0.031	0.78	0.11	0.33	0.058	0.6	0.13	0.25	0.43	5.4e-05	0.34	0.0018
GJB2	blue	-0.28	0.0094	0.28	0.0094	-0.17	0.13	0.26	0.017	0.019	0.87	0.63	2.1e-10	0.049	0.66	-0.48	3.4e-06	-0.23	0.035	-0.56	3.1e-08	-0.52	4.3e-07
TDG	blue	-0.23	0.039	0.23	0.039	-0.14	0.22	0.084	0.45	-0.13	0.23	0.26	0.016	-0.027	0.81	-0.27	0.014	-0.26	0.018	-0.29	0.0069	-0.28	0.011
PRIM2	blue	-0.22	0.043	0.22	0.043	0.039	0.73	0.11	0.31	-0.021	0.85	-0.25	0.021	-0.36	0.00077	-0.17	0.12	-0.2	0.076	-0.22	0.047	-0.18	0.11
FDXR	blue	0.13	0.26	-0.13	0.26	-0.34	0.0017	-0.095	0.39	-0.23	0.038	0.16	0.15	0.23	0.04	-0.044	0.69	0.061	0.59	-0.2	0.069	0.19	0.093
HMG20B	blue	-0.076	0.49	0.076	0.49	-0.11	0.34	0.14	0.2	0.011	0.92	-0.088	0.43	-0.2	0.064	-0.12	0.29	-0.082	0.46	-0.17	0.13	-0.056	0.61
NAA20	blue	-0.032	0.77	0.032	0.77	-0.2	0.064	-0.11	0.34	-0.16	0.16	0.18	0.097	0.12	0.29	-0.064	0.56	-0.11	0.31	-0.17	0.12	-0.046	0.68
SYNPO2	blue	0.46	1.1e-05	-0.46	1.1e-05	0.24	0.029	-0.16	0.15	0.14	0.22	-0.11	0.31	0.16	0.14	0.077	0.49	0.11	0.32	0.71	7.1e-14	0.46	9.9e-06
PEX3	blue	0.22	0.048	-0.22	0.048	-0.087	0.43	0.19	0.081	0.088	0.43	0.1	0.36	0.045	0.68	-0.28	0.0099	0.069	0.54	0.14	0.2	0.02	0.86
SENP1	blue	-0.14	0.21	0.14	0.21	-0.18	0.098	0.38	0.00039	0.16	0.14	0.11	0.33	0.11	0.31	-0.29	0.0073	-0.23	0.039	-0.15	0.17	-0.028	0.8
FAM92A	blue	-0.16	0.14	0.16	0.14	-0.17	0.13	0.27	0.015	0.14	0.22	-0.058	0.6	-0.042	0.71	-0.18	0.11	-0.14	0.19	-0.18	0.095	0.023	0.83
TKT	blue	-0.14	0.22	0.14	0.22	-0.16	0.16	0.2	0.077	0.058	0.6	0.083	0.45	-0.075	0.5	-0.24	0.032	-0.082	0.46	-0.35	0.001	-0.16	0.15
XIRP1	blue	0.24	0.029	-0.24	0.029	0.33	0.002	0.016	0.89	0.21	0.059	-0.22	0.043	-0.12	0.29	-0.035	0.75	-0.043	0.7	0.81	4.5e-20	0.3	0.0056
UCHL3	blue	0.0038	0.97	-0.0038	0.97	-0.15	0.18	0.16	0.14	0.015	0.89	0.17	0.13	-0.076	0.49	-0.27	0.014	-0.059	0.59	-0.24	0.026	0.067	0.55
H2AZ1	blue	-0.11	0.3	0.11	0.3	-0.26	0.017	0.029	0.79	-0.13	0.25	-0.013	0.9	0.029	0.8	-0.0036	0.97	-0.18	0.11	-0.3	0.0052	-0.23	0.037
PTPRZ1	blue	-0.32	0.003	0.32	0.003	-0.014	0.9	0.37	0.00062	0.15	0.17	0.2	0.063	-0.18	0.11	-0.3	0.0056	-0.21	0.055	-0.35	0.0013	-0.32	0.0031
STXBP2	blue	-0.13	0.26	0.13	0.26	-0.11	0.34	0.14	0.21	0.021	0.85	0.11	0.31	-0.1	0.35	-0.088	0.43	-0.088	0.43	-0.28	0.011	-0.062	0.58
PEX14	blue	-0.063	0.57	0.063	0.57	-0.25	0.021	0.18	0.1	-0.021	0.85	0.22	0.042	0.058	0.6	-0.21	0.055	-0.074	0.51	-0.24	0.029	-0.058	0.6
WDR20	blue	0.013	0.91	-0.013	0.91	-0.02	0.85	-0.018	0.87	-0.051	0.65	0.15	0.17	0.0088	0.94	-0.033	0.77	0.12	0.27	-0.19	0.093	0.04	0.72
SCN3B	blue	0.16	0.14	-0.16	0.14	0.27	0.014	-0.079	0.48	-7.7e-05	1	0.031	0.78	0.036	0.74	-0.0013	0.99	0.032	0.78	0.58	1.1e-08	0.23	0.041
QKI	blue	-0.14	0.19	0.14	0.19	0.21	0.058	0.29	0.0079	0.27	0.014	0.076	0.5	-0.15	0.18	-0.21	0.062	-0.1	0.37	0.19	0.083	-0.0052	0.96
TRIM54	blue	0.17	0.12	-0.17	0.12	0.2	0.064	-0.2	0.072	-0.1	0.37	-0.29	0.0083	-0.087	0.44	0.11	0.32	-0.029	0.79	0.71	6.6e-14	0.16	0.16
UCP3	blue	0.33	0.0025	-0.33	0.0025	0.19	0.091	-0.012	0.91	0.06	0.59	-0.28	0.011	-0.069	0.54	0.021	0.85	0.024	0.83	0.83	1.6e-22	0.34	0.0016
FZD8	blue	0.11	0.3	-0.11	0.3	0.43	4.3e-05	-0.17	0.12	0.14	0.21	-0.24	0.03	-0.077	0.49	0.32	0.0037	0.28	0.01	0.42	7e-05	0.42	8.2e-05
MRAS	blue	0.12	0.27	-0.12	0.27	0.58	8.3e-09	0.18	0.095	0.44	3.5e-05	-0.3	0.0055	-0.24	0.029	0.0064	0.95	0.044	0.7	0.57	1.7e-08	0.5	1.9e-06
POLR1E	blue	0.11	0.31	-0.11	0.31	-0.043	0.7	0.25	0.023	0.2	0.077	-0.15	0.19	-0.14	0.21	-0.2	0.069	-0.087	0.43	0.18	0.1	0.17	0.14
HSPB6	blue	0.52	3.7e-07	-0.52	3.7e-07	0.21	0.053	-0.28	0.01	0.0018	0.99	-0.26	0.016	0.13	0.23	0.22	0.043	0.16	0.14	0.83	1.2e-22	0.51	6.4e-07
PODNL1	blue	-0.12	0.27	0.12	0.27	0.31	0.0046	0.16	0.15	0.31	0.0045	0.15	0.19	-0.082	0.46	-0.11	0.32	-0.13	0.25	-0.13	0.24	0.14	0.22
H1-10	blue	-0.06	0.59	0.06	0.59	0.051	0.65	-0.083	0.46	-0.043	0.7	-0.041	0.72	-0.082	0.46	0.11	0.32	0.025	0.82	-0.094	0.4	-0.03	0.79
TMEM255A	blue	-0.025	0.83	0.025	0.83	0.22	0.043	0.016	0.88	0.08	0.47	-0.33	0.0024	-0.21	0.052	0.076	0.49	-0.082	0.46	0.29	0.0085	0.16	0.16
MRPL38	blue	0.0072	0.95	-0.0072	0.95	-0.022	0.84	0.21	0.059	0.13	0.25	0.15	0.18	-0.019	0.86	-0.19	0.089	0.06	0.59	-0.12	0.3	0.048	0.66
SVEP1	blue	0.22	0.043	-0.22	0.043	0.26	0.018	-0.13	0.26	0.11	0.32	-0.1	0.35	0.078	0.48	0.22	0.049	0.15	0.17	0.37	0.00061	0.36	0.00082
WIPI2	blue	0.11	0.32	-0.11	0.32	0.035	0.75	0.14	0.19	0.19	0.089	0.15	0.16	-0.057	0.61	-0.14	0.22	0.21	0.058	-0.12	0.28	0.14	0.22
HNRNPD	blue	-0.037	0.74	0.037	0.74	-0.069	0.53	0.099	0.37	-0.0034	0.98	-0.087	0.44	-0.07	0.53	-0.00012	1	0.065	0.56	-0.14	0.22	0.055	0.62
B4GALNT3	blue	-0.25	0.021	0.25	0.021	-0.11	0.33	0.068	0.54	-0.072	0.52	0.43	4.8e-05	0.066	0.56	-0.083	0.46	-0.17	0.11	-0.37	0.0005	-0.21	0.054
SECISBP2	blue	0.064	0.56	-0.064	0.56	-0.16	0.16	0.25	0.023	0.12	0.27	0.1	0.36	0.046	0.68	-0.15	0.19	-0.062	0.58	-0.1	0.37	0.039	0.73
LARGE1	blue	0.2	0.073	-0.2	0.073	0.3	0.0052	-0.041	0.71	0.11	0.34	-0.14	0.2	0.023	0.83	0.12	0.28	0.12	0.26	0.43	4.9e-05	0.42	7e-05
TFRC	blue	-0.2	0.077	0.2	0.077	0.015	0.9	-0.053	0.63	0.018	0.87	-0.064	0.57	-0.047	0.67	0.12	0.27	-0.029	0.8	-0.11	0.31	-0.12	0.29
MAN1A1	blue	0.058	0.6	-0.058	0.6	0.32	0.0032	0.39	0.00026	0.4	0.0002	0.021	0.85	-0.2	0.07	-0.32	0.0032	-0.018	0.87	0.25	0.023	0.22	0.043
XPO5	blue	-0.17	0.12	0.17	0.12	-0.099	0.37	0.089	0.42	-0.0041	0.97	0.0087	0.94	-0.14	0.2	-0.049	0.66	-0.15	0.19	-0.26	0.016	-0.26	0.015
AQP1	blue	0.38	0.00033	-0.38	0.00033	0.26	0.02	0.093	0.4	0.34	0.0016	-0.0063	0.96	0.11	0.34	-0.046	0.68	0.24	0.028	0.47	7.7e-06	0.51	9.6e-07
NCAM1	blue	0.06	0.59	-0.06	0.59	0.33	0.0026	-0.0054	0.96	0.064	0.57	-0.23	0.034	-0.15	0.17	-0.041	0.71	-0.044	0.69	0.57	2.5e-08	0.13	0.26
HS3ST2	blue	0.18	0.1	-0.18	0.1	0.38	0.00045	-0.03	0.79	0.26	0.016	-0.19	0.092	-0.053	0.64	0.087	0.44	0.3	0.0064	0.32	0.0033	0.31	0.0047
HYLS1	blue	-0.14	0.2	0.14	0.2	0.045	0.69	0.33	0.0022	0.34	0.0016	0.018	0.87	-0.068	0.54	-0.17	0.12	-0.061	0.58	-0.2	0.066	-0.016	0.88
TAX1BP3	blue	-0.055	0.62	0.055	0.62	-0.2	0.075	0.24	0.029	0.054	0.63	0.086	0.44	0.00076	0.99	-0.3	0.0062	-0.12	0.29	-0.3	0.0052	-0.057	0.61
GTF3C2	blue	-0.24	0.032	0.24	0.032	-0.11	0.31	0.049	0.66	-0.051	0.65	0.21	0.06	0.012	0.92	-0.1	0.37	-0.051	0.65	-0.36	0.00099	-0.13	0.24
SNAPC4	blue	0.015	0.89	-0.015	0.89	-0.17	0.13	0.33	0.0023	0.064	0.56	0.089	0.42	-0.025	0.82	-0.23	0.033	-0.047	0.67	-0.19	0.081	0.033	0.77
SLC43A1	blue	0.066	0.55	-0.066	0.55	0.29	0.0077	-0.2	0.073	0.014	0.9	-0.35	0.0013	-0.2	0.076	0.23	0.035	0.16	0.16	0.46	1.1e-05	0.25	0.024
DBNDD2	blue	-0.043	0.7	0.043	0.7	0.088	0.43	-0.0089	0.94	0.12	0.28	-0.0047	0.97	-0.034	0.76	0.025	0.82	-0.011	0.92	0.086	0.44	0.052	0.64
BAIAP2L2	blue	-0.24	0.026	0.24	0.026	-0.28	0.011	0.056	0.61	-0.15	0.16	0.23	0.039	-0.033	0.77	-0.17	0.13	-0.23	0.041	-0.4	0.00016	-0.37	0.00063
FBXO10	blue	0.32	0.003	-0.32	0.003	0.17	0.12	0.19	0.085	0.27	0.015	-0.13	0.24	-0.046	0.68	-0.15	0.18	0.12	0.28	0.59	3.9e-09	0.42	6.3e-05
PCBP1	blue	-0.079	0.48	0.079	0.48	-0.16	0.15	-0.075	0.5	-0.21	0.051	0.04	0.72	-0.021	0.85	-0.12	0.27	-0.18	0.11	-0.016	0.89	-0.082	0.46
DDX17	blue	0.052	0.64	-0.052	0.64	-0.2	0.071	0.21	0.059	0.033	0.77	0.14	0.22	0.045	0.68	-0.23	0.034	-0.071	0.53	-0.19	0.091	0.0019	0.99
ARHGEF15	blue	0.18	0.099	-0.18	0.099	0.29	0.008	0.073	0.51	0.25	0.02	-0.1	0.35	-0.068	0.54	0.005	0.96	0.12	0.28	0.41	0.00012	0.43	5.5e-05
ANKRD46	blue	0.1	0.36	-0.1	0.36	0.14	0.2	-0.077	0.49	0.034	0.76	0.089	0.42	-0.016	0.88	-0.086	0.44	-0.16	0.16	0.23	0.04	0.051	0.65
UQCC2	blue	0.057	0.61	-0.057	0.61	-0.24	0.03	0.014	0.9	-0.17	0.12	-0.14	0.2	-0.011	0.92	-0.049	0.66	0.051	0.65	0.11	0.3	-0.019	0.86
MAGI3	blue	0.19	0.087	-0.19	0.087	-0.28	0.011	0.025	0.82	-0.15	0.17	0.22	0.046	0.16	0.14	-0.22	0.043	0.041	0.71	-0.21	0.053	0.0059	0.96
PPIH	blue	-0.1	0.36	0.1	0.36	-0.24	0.031	0.069	0.54	-0.15	0.17	-0.16	0.14	-0.17	0.11	-0.099	0.37	-0.24	0.026	-0.21	0.052	-0.17	0.12
INIP	blue	-0.08	0.47	0.08	0.47	-0.049	0.66	0.27	0.014	0.098	0.38	-0.057	0.61	-0.055	0.62	-0.14	0.21	-0.052	0.64	-0.13	0.24	-0.012	0.92
STYK1	blue	-0.056	0.62	0.056	0.62	-0.16	0.15	-0.025	0.82	-0.081	0.47	0.11	0.33	0.21	0.058	-0.0087	0.94	-0.076	0.49	-0.26	0.017	0.013	0.91
RAP1GDS1	blue	-0.066	0.55	0.066	0.55	-0.041	0.72	0.24	0.027	0.14	0.2	-0.081	0.47	-0.21	0.058	-0.3	0.0053	-0.11	0.33	-0.21	0.056	-0.053	0.63
ARSJ	blue	-0.32	0.0028	0.32	0.0028	0.27	0.014	0.045	0.69	0.047	0.67	-0.1	0.36	-0.32	0.0028	-0.027	0.81	-0.1	0.35	-0.15	0.16	-0.21	0.057
ITGB8	blue	-0.1	0.36	0.1	0.36	0.11	0.31	0.13	0.25	0.13	0.26	0.085	0.44	-0.028	0.81	-0.029	0.8	-0.02	0.85	-0.085	0.45	0.025	0.82
CASP14	blue	-0.041	0.71	0.041	0.71	-0.017	0.88	0.33	0.0021	0.18	0.094	0.41	0.00014	-0.053	0.63	-0.38	0.00041	0.23	0.036	-0.26	0.019	-0.086	0.44
TMEM165	blue	-0.013	0.9	0.013	0.9	-0.24	0.027	0.25	0.025	0.036	0.74	0.15	0.16	0.15	0.18	-0.15	0.19	-0.22	0.046	-0.29	0.0075	0.044	0.69
AP2M1	blue	-0.09	0.42	0.09	0.42	0.055	0.62	0.043	0.7	0.012	0.91	-0.018	0.87	0.045	0.69	0.028	0.8	-0.17	0.12	-0.14	0.21	0.054	0.62
ZNF556	blue	0.11	0.31	-0.11	0.31	-0.013	0.91	-0.13	0.25	-0.1	0.37	-0.11	0.3	-0.055	0.62	0.1	0.37	-0.084	0.45	0.32	0.0036	0.05	0.65
RFC2	blue	-0.058	0.6	0.058	0.6	-0.00052	1	0.15	0.17	0.14	0.22	-0.12	0.3	-0.044	0.69	-0.066	0.55	-0.02	0.86	-0.14	0.22	-0.038	0.74
RECQL5	blue	0.087	0.44	-0.087	0.44	-0.22	0.046	0.043	0.7	-0.1	0.35	0.11	0.32	0.093	0.4	-0.12	0.28	-0.041	0.71	-0.12	0.27	0.069	0.54
UTY	blue	0.22	0.047	-0.22	0.047	0.11	0.33	-0.0072	0.95	0.11	0.34	-0.22	0.049	0.076	0.49	0.19	0.078	0.068	0.54	0.32	0.0037	0.35	0.0012
ROR1	blue	0.39	0.00027	-0.39	0.00027	0.088	0.43	0.013	0.91	0.15	0.17	0.063	0.57	0.14	0.2	-0.2	0.067	0.31	0.0049	0.21	0.057	0.2	0.073
SNRPD3	blue	0.012	0.92	-0.012	0.92	-0.3	0.0059	0.1	0.36	-0.045	0.68	0.12	0.3	0.11	0.31	-0.11	0.34	-0.12	0.28	-0.22	0.042	-0.0043	0.97
N4BP1	blue	-0.21	0.054	0.21	0.054	0.056	0.62	0.34	0.0018	0.14	0.2	0.23	0.034	-0.16	0.16	-0.31	0.0042	-0.2	0.069	-0.32	0.0037	-0.28	0.01
EHMT1	blue	-0.16	0.15	0.16	0.15	-0.045	0.69	0.18	0.11	0.091	0.41	0.026	0.81	-0.062	0.58	-0.15	0.19	0.028	0.8	-0.17	0.12	-0.12	0.29
CUEDC1	blue	0.23	0.041	-0.23	0.041	-0.051	0.64	-0.019	0.86	-0.037	0.74	-0.2	0.075	-0.053	0.63	-0.005	0.96	-0.069	0.54	0.25	0.025	0.21	0.054
YTHDC1	blue	0.014	0.9	-0.014	0.9	-0.19	0.085	0.16	0.16	0.046	0.68	0.038	0.74	0.16	0.14	-0.033	0.77	-0.035	0.75	-0.16	0.16	0.14	0.22
RARS1	blue	-0.033	0.76	0.033	0.76	-0.078	0.49	0.24	0.026	0.12	0.27	0.15	0.19	-0.054	0.63	-0.23	0.039	0.044	0.69	-0.29	0.0089	-0.12	0.3
YEATS2	blue	-0.4	0.00015	0.4	0.00015	0.037	0.74	0.29	0.007	0.2	0.071	-0.11	0.33	-0.33	0.0022	-0.084	0.45	-0.16	0.15	-0.34	0.0018	-0.21	0.054
TMPPE	blue	-0.16	0.15	0.16	0.15	0.15	0.19	0.13	0.26	0.14	0.21	-0.054	0.63	-0.17	0.13	-0.21	0.053	-0.16	0.15	-0.086	0.44	-0.054	0.63
NME1	blue	-0.092	0.41	0.092	0.41	-0.26	0.02	-0.076	0.5	-0.22	0.045	0.0089	0.94	-0.11	0.33	-0.061	0.58	0.12	0.29	-0.27	0.013	-0.11	0.32
HMCN2	blue	0.25	0.022	-0.25	0.022	0.34	0.0016	-0.05	0.66	0.12	0.29	-0.21	0.06	0.052	0.64	0.16	0.14	0.29	0.0082	0.67	5.8e-12	0.46	1.2e-05
WDR55	blue	-0.014	0.9	0.014	0.9	-0.071	0.52	0.24	0.028	0.1	0.36	0.1	0.36	-0.066	0.55	-0.29	0.0085	-0.094	0.4	-0.15	0.19	0.019	0.86
FAM210A	blue	0.074	0.51	-0.074	0.51	-0.15	0.18	0.029	0.8	-0.091	0.41	-0.046	0.68	-0.068	0.54	-0.12	0.28	-0.11	0.31	0.14	0.2	-0.14	0.21
CCDC24	blue	-0.15	0.17	0.15	0.17	-0.19	0.079	0.05	0.65	-0.11	0.33	-0.069	0.54	-0.083	0.45	0.0081	0.94	-0.039	0.72	-0.29	0.0073	0.057	0.61
AMDHD1	blue	-0.061	0.59	0.061	0.59	-0.14	0.22	0.18	0.11	-0.006	0.96	0.11	0.31	0.036	0.75	-0.079	0.48	-0.025	0.82	-0.14	0.2	-0.062	0.57
CHST10	blue	0.15	0.16	-0.15	0.16	0.31	0.0038	-0.14	0.21	0.024	0.83	-0.43	5.9e-05	-0.17	0.11	0.14	0.21	0.06	0.59	0.44	3e-05	0.28	0.011
ECI2	blue	0.046	0.68	-0.046	0.68	0.0029	0.98	0.11	0.34	0.047	0.67	-0.1	0.35	-0.28	0.01	-0.17	0.11	-0.057	0.61	0.1	0.37	-0.013	0.91
DCAF8	blue	0.054	0.63	-0.054	0.63	0.079	0.48	0.0035	0.97	-0.0043	0.97	0.0044	0.97	-0.036	0.75	-0.072	0.52	0.082	0.46	0.15	0.16	0.1	0.36
MIF	blue	-0.093	0.4	0.093	0.4	-0.16	0.15	-0.0045	0.97	-0.12	0.3	0.091	0.41	-0.0038	0.97	-0.039	0.73	-0.056	0.61	-0.2	0.073	-0.16	0.15
IKBKG	blue	0.0024	0.98	-0.0024	0.98	-0.084	0.45	0.051	0.65	-0.12	0.29	0.085	0.45	-0.017	0.88	-0.13	0.25	0.22	0.047	-0.18	0.11	-0.0097	0.93
PAQR6	blue	-0.082	0.46	0.082	0.46	-0.21	0.063	0.18	0.11	0.061	0.58	0.2	0.069	0.087	0.43	-0.13	0.24	-0.058	0.6	-0.16	0.15	-0.023	0.84
C1orf174	blue	-0.038	0.73	0.038	0.73	-0.12	0.26	0.13	0.23	0.069	0.53	0.041	0.71	-0.038	0.73	-0.27	0.014	-0.077	0.49	-0.2	0.077	-0.003	0.98
KCNJ15	blue	0.04	0.72	-0.04	0.72	0.041	0.71	0.3	0.0061	0.22	0.049	0.067	0.55	-0.12	0.26	-0.33	0.002	-0.077	0.49	-0.13	0.23	0.078	0.48
GNG10	blue	-0.064	0.57	0.064	0.57	0.19	0.082	0.15	0.17	0.19	0.081	-0.16	0.16	-0.16	0.16	-0.13	0.25	-0.0028	0.98	0.13	0.25	0.095	0.39
CMYA5	blue	0.44	4e-05	-0.44	4e-05	0.16	0.15	-0.19	0.091	0.0061	0.96	-0.25	0.024	0.085	0.44	0.14	0.19	0.094	0.4	0.86	6.2e-25	0.44	2.6e-05
FAM83F	blue	0.086	0.44	-0.086	0.44	-0.19	0.079	0.021	0.85	-0.033	0.77	0.21	0.06	0.1	0.37	-0.22	0.045	-0.038	0.74	-0.25	0.023	-0.024	0.83
KIF26A	blue	0.046	0.68	-0.046	0.68	0.28	0.0099	-0.21	0.055	-0.05	0.66	-0.085	0.44	-0.11	0.34	0.12	0.28	0.26	0.019	0.22	0.044	0.14	0.2
VRK1	blue	-0.19	0.079	0.19	0.079	-0.059	0.6	0.16	0.16	0.055	0.62	0.031	0.78	-0.064	0.57	-0.11	0.32	-0.22	0.049	-0.2	0.07	-0.15	0.17
STX17	blue	0.022	0.84	-0.022	0.84	-0.12	0.26	0.14	0.21	0.0095	0.93	0.11	0.34	0.087	0.43	-0.18	0.095	0.015	0.89	-0.14	0.21	0.0078	0.94
CORO1B	blue	-0.017	0.88	0.017	0.88	0.14	0.2	0.12	0.27	0.1	0.37	0.024	0.83	-0.14	0.21	-0.17	0.12	-0.041	0.71	0.1	0.34	0.06	0.59
SOCS7	blue	-0.013	0.91	0.013	0.91	-0.033	0.77	-0.066	0.55	-0.046	0.68	0.14	0.21	0.053	0.63	0.057	0.61	0.0047	0.97	-0.14	0.21	-0.0017	0.99
SETDB1	blue	-0.11	0.32	0.11	0.32	-0.1	0.35	0.24	0.032	0.13	0.24	0.1	0.35	-0.034	0.76	-0.26	0.016	-0.25	0.024	-0.21	0.054	-0.15	0.18
HDAC1	blue	-0.096	0.39	0.096	0.39	-0.12	0.27	0.21	0.057	0.088	0.43	0.26	0.017	-0.011	0.92	-0.33	0.0022	-0.11	0.32	-0.26	0.019	-0.14	0.21
FAM13C	blue	0.32	0.003	-0.32	0.003	0.27	0.014	-0.037	0.74	0.17	0.13	-0.19	0.088	-0.034	0.76	0.01	0.93	0.095	0.39	0.63	2e-10	0.51	1.1e-06
MAP4	blue	-0.0019	0.99	0.0019	0.99	0.071	0.53	0.18	0.1	0.14	0.19	0.088	0.43	-0.061	0.58	-0.24	0.029	-0.098	0.38	0.24	0.031	-0.023	0.84
LMOD3	blue	0.34	0.0016	-0.34	0.0016	0.22	0.05	-0.19	0.08	-0.0029	0.98	-0.24	0.028	0.00066	1	0.11	0.34	0.0029	0.98	0.84	6e-23	0.31	0.0041
WIZ	blue	-0.26	0.016	0.26	0.016	0.17	0.12	0.25	0.025	0.31	0.0042	-0.024	0.83	-0.24	0.028	-0.17	0.13	-0.18	0.1	-0.16	0.15	-0.027	0.81
OTULINL	blue	-0.17	0.14	0.17	0.14	0.19	0.08	0.29	0.0081	0.32	0.0032	0.015	0.89	-0.17	0.11	-0.27	0.015	-0.19	0.083	-0.15	0.17	0.001	0.99
MYBPC1	blue	0.44	3.4e-05	-0.44	3.4e-05	0.2	0.074	-0.21	0.06	0.015	0.89	-0.25	0.025	0.072	0.52	0.13	0.24	0.089	0.42	0.81	1.6e-20	0.44	3.6e-05
KRT5	blue	-0.26	0.017	0.26	0.017	-0.32	0.0029	0.21	0.059	-0.064	0.57	0.6	1.4e-09	0.068	0.54	-0.49	3.3e-06	-0.13	0.24	-0.64	8e-11	-0.48	4.8e-06
NEMP2	blue	-0.032	0.77	0.032	0.77	-0.02	0.86	-0.11	0.32	-0.036	0.74	-0.19	0.078	-0.16	0.15	0.0071	0.95	-0.15	0.19	0.11	0.31	0.017	0.88
EPB41L5	blue	-0.072	0.52	0.072	0.52	-0.2	0.072	0.22	0.047	0.13	0.25	0.15	0.17	0.066	0.55	-0.17	0.12	-0.19	0.083	-0.16	0.15	-0.093	0.4
CCNC	blue	0.14	0.22	-0.14	0.22	-0.26	0.019	0.013	0.91	-0.11	0.31	0.029	0.8	0.074	0.5	-0.16	0.16	-0.016	0.89	0.024	0.83	-0.026	0.82
ANKRD40	blue	0.075	0.5	-0.075	0.5	0.22	0.041	-0.15	0.17	-0.056	0.62	-0.41	0.00011	-0.24	0.028	0.075	0.5	-0.051	0.65	0.31	0.0046	0.17	0.13
NIPSNAP1	blue	-0.16	0.14	0.16	0.14	-0.0023	0.98	0.03	0.79	-0.033	0.77	0.1	0.35	-0.022	0.85	0.083	0.46	-0.092	0.41	-0.17	0.11	-0.061	0.58
KAT6A	blue	0.15	0.19	-0.15	0.19	0.058	0.6	0.032	0.77	0.12	0.28	0.022	0.84	0.13	0.23	-0.097	0.38	-0.0044	0.97	0.2	0.065	0.13	0.23
TDP2	blue	-0.13	0.25	0.13	0.25	-0.069	0.53	0.38	0.0004	0.17	0.13	0.14	0.2	-0.062	0.58	-0.2	0.072	-0.19	0.092	-0.19	0.08	-0.056	0.61
SLC2A9	blue	-0.18	0.11	0.18	0.11	-0.012	0.91	0.23	0.037	0.0091	0.94	0.12	0.26	-0.11	0.34	-0.25	0.024	-0.12	0.27	-0.18	0.1	-0.063	0.57
MAPK1IP1L	blue	-0.0061	0.96	0.0061	0.96	0.015	0.89	0.2	0.069	0.12	0.28	0.026	0.82	-0.12	0.27	-0.35	0.001	-0.15	0.18	-0.16	0.15	0.045	0.69
FAM131C	blue	0.069	0.54	-0.069	0.54	-0.22	0.043	-0.11	0.31	-0.12	0.29	0.12	0.29	0.13	0.24	0.0096	0.93	-0.068	0.54	-0.2	0.072	0.11	0.3
MLYCD	blue	0.31	0.0045	-0.31	0.0045	0.14	0.2	-0.081	0.47	0.032	0.77	-0.2	0.071	0.047	0.68	0.026	0.82	0.16	0.16	0.51	7.2e-07	0.4	0.00019
CECR2	blue	-0.018	0.87	0.018	0.87	0.083	0.45	0.033	0.77	0.086	0.44	-0.13	0.26	0.057	0.61	0.21	0.057	0.038	0.73	0.28	0.012	0.2	0.074
ADNP	blue	-0.17	0.11	0.17	0.11	0.032	0.77	0.096	0.39	0.14	0.21	-0.038	0.73	-0.03	0.79	-0.026	0.82	-0.079	0.48	-0.21	0.053	-0.014	0.9
LMOD2	blue	0.37	0.00061	-0.37	0.00061	0.22	0.046	-0.23	0.034	-0.0063	0.96	-0.19	0.079	0.069	0.54	0.16	0.15	0.065	0.56	0.85	7e-24	0.32	0.0031
STARD8	blue	-0.023	0.84	0.023	0.84	0.38	0.00038	0.3	0.0055	0.41	0.00014	-0.12	0.28	-0.24	0.026	-0.24	0.031	-0.0061	0.96	0.28	0.012	0.19	0.083
PRRT4	blue	0.17	0.13	-0.17	0.13	0.021	0.85	0.1	0.37	0.036	0.74	-0.17	0.13	-0.1	0.35	-0.21	0.06	-0.11	0.34	0.41	0.00012	0.18	0.1
VDAC1	blue	0.12	0.29	-0.12	0.29	-0.18	0.11	0.12	0.3	-0.016	0.89	0.18	0.099	0.049	0.66	-0.28	0.011	-0.072	0.52	0.066	0.55	-0.0041	0.97
CMC1	blue	0.1	0.36	-0.1	0.36	-0.15	0.17	0.074	0.51	0.024	0.83	-0.15	0.17	-0.014	0.9	-0.096	0.39	-0.081	0.47	0.1	0.35	0.0069	0.95
CPNE5	blue	-0.054	0.63	0.054	0.63	0.26	0.016	0.15	0.18	0.26	0.016	-0.1	0.35	-0.19	0.088	-0.16	0.14	-0.096	0.39	0.16	0.15	0.11	0.34
XRCC3	blue	-0.19	0.09	0.19	0.09	-0.16	0.14	0.12	0.27	-0.078	0.48	-0.065	0.56	-0.25	0.022	-0.18	0.096	-0.24	0.026	-0.28	0.011	-0.21	0.053
CTR9	blue	0.053	0.63	-0.053	0.63	-0.12	0.27	0.21	0.06	0.047	0.67	0.14	0.19	0.051	0.65	-0.29	0.0072	-0.14	0.22	-0.19	0.088	0.13	0.25
ADRA2C	blue	-0.016	0.89	0.016	0.89	0.13	0.24	-0.16	0.16	-0.059	0.6	-0.15	0.18	-0.069	0.54	0.18	0.11	0.038	0.73	0.097	0.38	0.065	0.56
YPEL2	blue	0.17	0.14	-0.17	0.14	0.3	0.0067	-0.16	0.15	0.12	0.27	0.11	0.31	0.082	0.46	0.091	0.41	0.084	0.45	0.38	0.00035	0.27	0.015
BCAS2	blue	0.12	0.27	-0.12	0.27	-0.3	0.0066	0.11	0.32	-0.039	0.73	0.049	0.66	0.11	0.33	-0.15	0.19	-0.053	0.63	-0.16	0.14	0.0069	0.95
YRDC	blue	0.063	0.57	-0.063	0.57	-0.086	0.44	-0.05	0.65	-0.13	0.26	-0.059	0.6	-0.06	0.59	-0.21	0.059	0.16	0.14	-0.11	0.3	-0.05	0.66
SRGAP2B	blue	-0.018	0.87	0.018	0.87	0.25	0.021	0.22	0.044	0.32	0.0034	-0.12	0.27	-0.17	0.12	-0.3	0.0066	-0.1	0.36	0.14	0.22	-0.011	0.92
ESAM	blue	0.14	0.2	-0.14	0.2	0.31	0.0038	0.15	0.18	0.32	0.0037	-0.061	0.58	-0.047	0.67	-0.14	0.2	0.13	0.24	0.37	0.00068	0.26	0.016
CDADC1	blue	0.098	0.38	-0.098	0.38	0.088	0.43	0.065	0.56	0.051	0.65	-0.095	0.39	-0.049	0.66	-0.1	0.37	0.11	0.32	0.35	0.0011	0.16	0.14
NXF1	blue	0.038	0.73	-0.038	0.73	-0.093	0.4	0.0098	0.93	-0.087	0.44	0.12	0.29	0.13	0.24	-0.11	0.32	0.0077	0.94	-0.096	0.39	-0.016	0.89
EDEM3	blue	0.021	0.85	-0.021	0.85	0.27	0.013	0.07	0.53	0.2	0.065	-0.12	0.27	-0.1	0.36	-0.027	0.81	0.069	0.54	0.24	0.032	0.043	0.7
OSBPL6	blue	0.22	0.046	-0.22	0.046	0.021	0.85	-0.2	0.073	-0.034	0.76	0.051	0.65	0.042	0.7	0.12	0.3	0.25	0.021	0.22	0.047	0.12	0.26
ST6GALNAC4	blue	-0.075	0.5	0.075	0.5	0.049	0.66	-0.18	0.11	-0.16	0.15	-0.18	0.11	-0.27	0.015	0.057	0.61	-0.074	0.51	0.18	0.1	0.02	0.86
G6PD	blue	-0.2	0.065	0.2	0.065	-0.3	0.0059	0.056	0.62	-0.1	0.36	0.19	0.089	0.11	0.32	-0.038	0.74	-0.17	0.12	-0.3	0.0065	-0.17	0.11
TRDN	blue	0.34	0.0017	-0.34	0.0017	0.19	0.08	-0.18	0.1	-0.039	0.73	-0.18	0.1	0.018	0.87	0.094	0.4	-0.014	0.9	0.82	6.2e-21	0.26	0.017
AR	blue	0.44	2.9e-05	-0.44	2.9e-05	0.26	0.016	-0.2	0.071	0.054	0.63	-0.22	0.044	0.23	0.037	0.31	0.0039	0.47	8.9e-06	0.64	9.7e-11	0.62	3.2e-10
CDK12	blue	-0.0053	0.96	0.0053	0.96	-0.16	0.15	0.0083	0.94	-0.17	0.13	0.06	0.59	0.048	0.67	-0.074	0.51	-0.11	0.33	-0.19	0.085	0.014	0.9
CDCP1	blue	-0.081	0.47	0.081	0.47	-0.31	0.0042	0.2	0.072	-0.042	0.71	0.34	0.0015	-0.003	0.98	-0.41	0.00011	-0.17	0.13	-0.41	0.00014	-0.3	0.0055
RASSF10	blue	-0.052	0.64	0.052	0.64	-0.24	0.027	0.32	0.0033	0.033	0.77	0.31	0.0046	0.01	0.93	-0.47	6e-06	-0.089	0.42	-0.34	0.0017	-0.23	0.035
PSME1	blue	-0.032	0.77	0.032	0.77	-0.21	0.052	0.27	0.013	0.14	0.22	-0.047	0.68	-0.042	0.71	-0.12	0.26	-0.08	0.47	-0.17	0.12	0.027	0.81
GLRX2	blue	0.32	0.003	-0.32	0.003	-0.064	0.57	-0.022	0.85	0.039	0.73	-0.0013	0.99	0.089	0.43	-0.04	0.72	0.062	0.58	0.17	0.12	0.15	0.19
RRAS	blue	0.017	0.88	-0.017	0.88	0.17	0.12	0.034	0.76	0.036	0.75	-0.24	0.029	-0.24	0.03	-0.066	0.55	-0.084	0.45	0.33	0.0021	0.23	0.039
KCNG1	blue	0.054	0.63	-0.054	0.63	0.088	0.43	-0.13	0.25	0.00012	1	-0.086	0.44	-0.00084	0.99	0.1	0.35	-0.065	0.56	0.081	0.47	0.022	0.84
GPER1	blue	-0.16	0.15	0.16	0.15	0.31	0.0045	0.061	0.59	0.094	0.4	-0.21	0.052	-0.19	0.082	0.18	0.11	-0.0095	0.93	0.12	0.29	0.11	0.3
FRAS1	blue	0.2	0.074	-0.2	0.074	0.056	0.62	-0.2	0.073	-0.1	0.36	-0.13	0.23	0.065	0.56	0.21	0.059	0.017	0.88	0.23	0.034	0.2	0.073
UBE2E3	blue	-0.067	0.55	0.067	0.55	-0.07	0.53	0.002	0.99	-0.07	0.53	-0.01	0.93	-0.047	0.67	-0.11	0.33	-0.12	0.26	-0.14	0.21	-0.02	0.86
C6orf47	blue	0.13	0.24	-0.13	0.24	-0.32	0.0034	0.24	0.028	0.028	0.8	0.075	0.5	0.13	0.25	-0.25	0.02	-0.1	0.37	-0.12	0.27	0.043	0.7
CLUAP1	blue	0.044	0.69	-0.044	0.69	0.019	0.87	-0.044	0.69	-0.03	0.79	-0.35	0.0011	-0.033	0.77	0.31	0.0043	0.068	0.54	0.25	0.025	0.23	0.037
CLOCK	blue	-0.04	0.72	0.04	0.72	-0.11	0.33	0.13	0.24	0.014	0.9	0.25	0.021	0.029	0.79	-0.36	0.00071	-0.092	0.41	-0.17	0.12	-0.15	0.18
NFRKB	blue	-0.035	0.75	0.035	0.75	-0.13	0.26	0.13	0.24	0.077	0.49	0.041	0.71	-0.022	0.84	-0.24	0.027	-0.073	0.51	-0.19	0.084	-0.031	0.78
RIC1	blue	0.0092	0.93	-0.0092	0.93	0.0017	0.99	0.41	0.0001	0.31	0.0047	0.28	0.011	-0.011	0.92	-0.38	0.00039	-0.061	0.58	-0.21	0.058	-0.0084	0.94
ANXA4	blue	-0.12	0.29	0.12	0.29	0.11	0.31	0.22	0.047	0.13	0.24	0.04	0.72	-0.13	0.24	-0.15	0.17	-0.082	0.46	-0.14	0.21	0.094	0.4
CAMK2A	blue	0.19	0.09	-0.19	0.09	0.23	0.035	-0.016	0.88	0.087	0.44	-0.12	0.27	-0.025	0.82	0.013	0.91	-0.015	0.89	0.76	1.6e-16	0.25	0.022
UBE2O	blue	-0.09	0.42	0.09	0.42	-0.025	0.82	0.096	0.39	0.028	0.8	0.063	0.57	-0.096	0.39	-0.076	0.49	-0.17	0.11	-0.19	0.08	-0.063	0.57
ARHGAP42	blue	0.038	0.73	-0.038	0.73	0.18	0.097	0.24	0.031	0.22	0.045	-0.046	0.68	-0.073	0.51	-0.23	0.041	-0.076	0.5	0.25	0.024	0.16	0.15
FKBP1A	blue	0.11	0.3	-0.11	0.3	0.033	0.77	-0.094	0.4	-0.11	0.34	-0.025	0.82	-0.037	0.74	-0.063	0.57	-0.098	0.38	0.24	0.027	0.035	0.75
TTC21B	blue	0.14	0.22	-0.14	0.22	0.18	0.1	-0.27	0.013	-0.19	0.087	-0.34	0.0015	-0.096	0.39	0.25	0.024	-0.024	0.83	0.36	0.00096	0.22	0.046
EIF4EBP1	blue	-0.16	0.14	0.16	0.14	-0.33	0.0021	0.067	0.55	-0.2	0.076	-0.029	0.79	-0.12	0.29	-0.11	0.33	-0.2	0.075	-0.35	0.0012	-0.23	0.039
E2F2	blue	-0.084	0.45	0.084	0.45	-0.13	0.24	0.088	0.43	0.069	0.53	0.2	0.064	0.093	0.4	-0.19	0.09	-0.055	0.62	-0.28	0.011	-0.21	0.061
SNX30	blue	-0.19	0.08	0.19	0.08	-0.048	0.67	0.009	0.94	-0.081	0.47	0.037	0.74	-0.063	0.57	-0.14	0.21	-0.15	0.16	-0.25	0.021	-0.1	0.35
ZNF423	blue	0.26	0.017	-0.26	0.017	0.48	3.4e-06	-0.067	0.55	0.2	0.075	-0.19	0.086	-0.00087	0.99	0.14	0.21	0.054	0.63	0.47	8.1e-06	0.48	3.5e-06
ZNF276	blue	0.16	0.15	-0.16	0.15	-0.21	0.052	0.029	0.79	-0.068	0.54	0.091	0.41	0.076	0.5	-0.052	0.64	0.033	0.77	-0.16	0.16	0.071	0.52
TOR1B	blue	-0.18	0.11	0.18	0.11	-0.12	0.28	0.076	0.49	-0.028	0.8	-0.091	0.41	-0.11	0.31	-0.013	0.91	-0.03	0.79	-0.15	0.18	-0.12	0.3
TCEA2	blue	0.11	0.32	-0.11	0.32	0.2	0.064	-0.17	0.13	0.01	0.93	-0.46	1.3e-05	-0.19	0.082	0.24	0.026	0.078	0.48	0.35	0.0013	0.32	0.0028
ATAD3A	blue	-0.054	0.63	0.054	0.63	-0.17	0.13	-0.062	0.58	-0.21	0.054	-0.045	0.69	-0.18	0.11	-0.17	0.13	-0.11	0.31	-0.25	0.02	-0.14	0.21
AVPI1	blue	-0.094	0.4	0.094	0.4	-0.12	0.27	0.22	0.049	0.048	0.67	0.11	0.32	-0.08	0.47	-0.27	0.014	-0.076	0.49	-0.23	0.038	-0.085	0.45
CSTF2T	blue	0.078	0.48	-0.078	0.48	-0.093	0.41	0.11	0.33	0.028	0.8	-0.041	0.71	0.037	0.74	-0.1	0.35	-0.045	0.69	0.11	0.31	0.084	0.45
PROX1	blue	0.11	0.33	-0.11	0.33	0.31	0.0043	0.021	0.85	0.11	0.32	-0.18	0.11	-0.075	0.5	-0.037	0.74	0.043	0.7	0.56	3.1e-08	0.22	0.048
NUDT5	blue	-0.14	0.2	0.14	0.2	-0.33	0.0022	0.12	0.27	-0.14	0.21	0.13	0.22	0.019	0.87	-0.22	0.042	-0.055	0.62	-0.38	0.00033	-0.1	0.35
MTMR2	blue	-0.16	0.15	0.16	0.15	-0.14	0.21	0.27	0.015	0.033	0.77	0.18	0.11	-0.079	0.48	-0.38	0.00039	-0.22	0.05	-0.26	0.018	-0.19	0.08
SLC52A1	blue	-0.24	0.027	0.24	0.027	-0.18	0.11	0.063	0.57	-0.12	0.27	-0.16	0.14	-0.094	0.4	0.11	0.34	-0.034	0.76	-0.18	0.11	-0.12	0.29
ETF1	blue	-0.21	0.058	0.21	0.058	-0.12	0.28	0.33	0.0022	0.059	0.6	0.36	0.00086	-0.079	0.48	-0.43	4.2e-05	-0.12	0.3	-0.3	0.0065	-0.2	0.063
ELMO3	blue	-0.11	0.33	0.11	0.33	-0.37	0.00053	0.088	0.43	-0.11	0.33	0.23	0.034	-0.032	0.78	-0.26	0.018	-0.21	0.057	-0.46	1.2e-05	-0.22	0.041
TBC1D25	blue	-0.12	0.27	0.12	0.27	0.0066	0.95	0.25	0.021	0.19	0.086	-0.0078	0.94	-0.1	0.36	-0.27	0.014	-0.1	0.35	-0.15	0.16	-0.027	0.81
CXCL1	blue	-0.014	0.9	0.014	0.9	-0.026	0.82	0.18	0.11	0.16	0.15	0.039	0.73	-0.078	0.48	-0.21	0.06	-0.07	0.53	-0.14	0.2	-0.024	0.83
UNC50	blue	0.047	0.67	-0.047	0.67	-0.24	0.029	0.12	0.27	-0.03	0.79	0.021	0.85	0.094	0.4	-0.08	0.47	0.061	0.58	-0.15	0.17	0.085	0.44
CASP4	blue	-0.1	0.37	0.1	0.37	-0.1	0.35	0.31	0.004	0.12	0.27	0.24	0.032	-0.083	0.46	-0.45	2.2e-05	-0.14	0.2	-0.23	0.039	-0.12	0.26
KCNJ11	blue	0.33	0.0024	-0.33	0.0024	0.094	0.4	-0.17	0.13	-0.053	0.64	-0.17	0.12	0.076	0.49	0.17	0.13	0.023	0.84	0.79	3.8e-19	0.34	0.002
PRG4	blue	0.39	0.0003	-0.39	0.0003	0.42	9.2e-05	-0.042	0.7	0.3	0.0061	-0.29	0.0069	0.0022	0.98	0.15	0.18	0.21	0.054	0.65	3.5e-11	0.64	9.1e-11
FUNDC2	blue	0.15	0.16	-0.15	0.16	-0.056	0.62	-0.04	0.72	-0.062	0.58	-0.14	0.21	0.0032	0.98	-0.03	0.79	0.036	0.75	0.23	0.033	0.21	0.054
UBE2H	blue	-0.0081	0.94	0.0081	0.94	-0.16	0.16	0.15	0.17	0.035	0.75	0.082	0.46	-0.041	0.71	-0.28	0.011	-0.14	0.2	-0.14	0.2	0.003	0.98
CTCF	blue	-0.15	0.18	0.15	0.18	-0.023	0.83	0.33	0.0027	0.13	0.24	0.086	0.44	-0.15	0.19	-0.25	0.024	-0.15	0.18	-0.21	0.054	-0.07	0.53
MYO1D	blue	-0.038	0.74	0.038	0.74	-0.05	0.65	0.17	0.12	0.11	0.33	0.21	0.058	0.0073	0.95	-0.18	0.1	-0.11	0.34	-0.16	0.16	-0.022	0.84
TSPAN9	blue	-0.12	0.26	0.12	0.26	0.13	0.23	-0.12	0.29	-0.058	0.6	-0.018	0.87	-0.14	0.21	0.09	0.42	-0.0035	0.97	-0.12	0.26	0.031	0.78
DNAJC24	blue	0.17	0.12	-0.17	0.12	0.016	0.88	0.071	0.53	0.039	0.73	-0.071	0.52	-0.013	0.91	-0.12	0.29	0.011	0.92	0.19	0.088	0.08	0.47
UBE2D1	blue	-0.052	0.64	0.052	0.64	0.042	0.7	-0.04	0.72	-0.0083	0.94	-0.055	0.62	-0.04	0.72	-0.027	0.81	-0.2	0.075	0.13	0.24	-0.0046	0.97
RHOQ	blue	0.084	0.45	-0.084	0.45	0.31	0.0038	-0.088	0.43	0.13	0.26	-0.013	0.91	-0.095	0.39	0.068	0.54	-0.02	0.86	0.32	0.0036	0.22	0.041
IL18	blue	0.07	0.53	-0.07	0.53	-0.38	0.00045	0.14	0.2	-0.066	0.55	0.47	8e-06	0.15	0.18	-0.35	0.0014	-0.11	0.34	-0.44	2.6e-05	-0.17	0.12
ZNF234	blue	0.18	0.1	-0.18	0.1	0.12	0.28	-0.07	0.53	-0.029	0.8	-0.22	0.041	-0.075	0.5	0.044	0.69	-0.11	0.34	0.23	0.033	0.26	0.018
S1PR5	blue	-0.28	0.0093	0.28	0.0093	-0.14	0.19	0.25	0.022	0.0027	0.98	-0.008	0.94	-0.26	0.02	-0.13	0.23	-0.026	0.82	-0.33	0.0021	-0.31	0.0043
SP140L	blue	-0.15	0.16	0.15	0.16	-0.27	0.015	0.38	0.00038	0.15	0.18	0.064	0.56	-0.1	0.35	-0.26	0.02	-0.24	0.027	-0.31	0.0045	-0.16	0.15
FZD4	blue	0.25	0.021	-0.25	0.021	0.47	6.1e-06	0.093	0.4	0.39	0.00028	-0.36	0.00084	-0.24	0.026	0.027	0.81	0.068	0.54	0.63	1.6e-10	0.42	9.4e-05
FBP2	blue	0.42	9e-05	-0.42	9e-05	0.14	0.2	-0.19	0.081	-0.052	0.64	-0.23	0.04	0.065	0.56	0.15	0.17	0.23	0.038	0.83	1.3e-22	0.42	7.6e-05
MRE11	blue	0.0046	0.97	-0.0046	0.97	-0.13	0.24	0.015	0.89	-0.058	0.6	-0.0078	0.94	-0.013	0.91	-0.15	0.18	-0.11	0.3	-0.12	0.29	-0.015	0.9
MFSD2A	blue	-0.15	0.17	0.15	0.17	-0.24	0.029	0.1	0.36	-0.12	0.29	0.3	0.0055	-0.069	0.54	-0.37	0.00067	-0.012	0.91	-0.36	0.00085	-0.26	0.018
SH3BP1	blue	-0.27	0.014	0.27	0.014	-0.068	0.54	0.28	0.01	0.12	0.29	0.2	0.075	-0.13	0.23	-0.32	0.003	-0.18	0.098	-0.36	0.0007	-0.33	0.0025
FRA10AC1	blue	0.2	0.066	-0.2	0.066	0.034	0.76	0.055	0.62	-0.0034	0.98	-0.017	0.88	-0.0085	0.94	-0.14	0.2	0.024	0.83	0.31	0.0039	0.33	0.0023
TMEM171	blue	-0.19	0.087	0.19	0.087	-0.18	0.097	0.35	0.0014	0.11	0.32	0.057	0.61	-0.18	0.1	-0.39	0.00023	-0.2	0.077	-0.3	0.0063	-0.26	0.018
TAF2	blue	-0.22	0.05	0.22	0.05	-0.016	0.89	0.056	0.62	-0.077	0.49	0.0092	0.93	-0.045	0.68	-0.039	0.72	-0.15	0.19	-0.17	0.12	-0.13	0.25
PRPF6	blue	0.049	0.66	-0.049	0.66	0.064	0.57	0.12	0.27	0.18	0.094	-0.023	0.84	0.001	0.99	-0.075	0.5	-0.08	0.47	0.17	0.12	0.079	0.48
CIT	blue	-0.22	0.044	0.22	0.044	-0.024	0.83	0.32	0.0033	0.12	0.26	-0.2	0.075	-0.25	0.021	-0.19	0.086	-0.19	0.091	-0.24	0.028	-0.1	0.37
RRAS2	blue	-0.092	0.41	0.092	0.41	-0.08	0.47	0.21	0.054	0.071	0.52	-0.042	0.71	-0.19	0.082	-0.24	0.028	-0.13	0.25	-0.15	0.17	-0.11	0.32
PON2	blue	-0.055	0.62	0.055	0.62	0.16	0.15	-0.012	0.92	-0.0061	0.96	-0.14	0.21	-0.14	0.22	0.067	0.55	0.03	0.79	-0.079	0.48	0.085	0.45
PPP2R5E	blue	0.075	0.5	-0.075	0.5	-0.26	0.018	0.027	0.81	-0.067	0.55	0.16	0.16	0.11	0.3	-0.043	0.7	-0.039	0.72	-0.0098	0.93	0.025	0.82
TFEB	blue	0.25	0.023	-0.25	0.023	0.11	0.31	0.029	0.8	0.076	0.49	-0.2	0.074	0.0071	0.95	-0.05	0.65	-0.0024	0.98	0.34	0.0014	0.37	0.00054
MBD2	blue	-0.052	0.64	0.052	0.64	-0.26	0.018	-0.063	0.57	-0.25	0.024	0.15	0.18	0.055	0.62	-0.099	0.37	-0.091	0.41	-0.19	0.084	-0.0085	0.94
BICD2	blue	-0.35	0.0012	0.35	0.0012	-0.16	0.15	0.18	0.099	-0.077	0.49	0.32	0.0031	-0.0037	0.97	-0.19	0.086	-0.25	0.023	-0.49	3e-06	-0.33	0.0027
MLIP	blue	0.27	0.015	-0.27	0.015	0.068	0.54	-0.06	0.59	-0.073	0.51	0.22	0.041	0.12	0.26	-0.15	0.16	0.0024	0.98	0.53	2.2e-07	0.22	0.048
WIPF3	blue	0.29	0.0087	-0.29	0.0087	0.024	0.83	-0.022	0.84	0.049	0.66	-0.35	0.0014	0.057	0.61	0.22	0.042	0.034	0.76	0.45	1.8e-05	0.47	5.7e-06
UFSP2	blue	0.025	0.82	-0.025	0.82	-0.11	0.34	-0.0092	0.93	-0.12	0.3	0.22	0.048	0.052	0.64	-0.17	0.13	-0.12	0.27	0.07	0.53	0.0094	0.93
PURA	blue	0.063	0.57	-0.063	0.57	0.11	0.33	0.17	0.12	0.15	0.17	-0.12	0.3	-0.073	0.51	-0.17	0.11	-0.098	0.38	0.24	0.027	0.23	0.034
SMG6	blue	0.1	0.35	-0.1	0.35	0.098	0.38	0.26	0.017	0.14	0.22	0.08	0.47	-0.03	0.79	-0.31	0.0042	0.033	0.77	0.2	0.071	0.18	0.099
CILP	blue	0.33	0.0023	-0.33	0.0023	0.51	8.7e-07	-0.13	0.25	0.22	0.05	-0.24	0.03	-0.018	0.87	0.18	0.1	0.2	0.066	0.79	3.7e-19	0.53	2.5e-07
ZDHHC2	blue	0.31	0.0043	-0.31	0.0043	0.23	0.037	-0.22	0.048	0.029	0.8	-0.36	0.00082	0.088	0.43	0.32	0.0029	0.11	0.32	0.66	1.5e-11	0.54	1.5e-07
RAB2B	blue	0.043	0.7	-0.043	0.7	0.095	0.39	0.16	0.15	0.038	0.73	-0.14	0.21	-0.14	0.19	-0.17	0.13	0.021	0.85	0.12	0.28	0.1	0.37
ANXA2	blue	-0.031	0.78	0.031	0.78	-0.33	0.0021	0.19	0.08	-0.027	0.81	0.18	0.11	0.1	0.35	-0.27	0.015	-0.089	0.42	-0.38	0.00034	-0.043	0.7
LGI4	blue	0.34	0.0017	-0.34	0.0017	0.17	0.12	-0.095	0.39	0.068	0.54	-0.21	0.062	-0.038	0.73	0.061	0.59	0.31	0.004	0.56	2.9e-08	0.46	1.5e-05
GCC1	blue	-0.014	0.9	0.014	0.9	-0.19	0.093	0.24	0.028	0.16	0.14	0.029	0.79	0.0093	0.93	-0.16	0.14	-0.24	0.029	-0.18	0.11	0.061	0.58
POP5	blue	0.31	0.0039	-0.31	0.0039	-0.19	0.08	-0.14	0.2	-0.24	0.032	0.013	0.91	0.081	0.47	-0.12	0.26	0.059	0.59	0.25	0.022	0.15	0.17
DRAP1	blue	-0.052	0.64	0.052	0.64	-0.26	0.019	0.071	0.52	-0.079	0.48	0.11	0.32	-0.057	0.61	-0.22	0.05	-0.014	0.9	-0.27	0.014	-0.17	0.13
TAL1	blue	-0.008	0.94	0.008	0.94	0.14	0.21	0.14	0.19	0.18	0.095	0.026	0.82	-0.046	0.68	-0.1	0.35	-0.0026	0.98	0.15	0.17	0.17	0.13
RPA3	blue	-0.13	0.23	0.13	0.23	-0.3	0.0051	0.19	0.082	-0.079	0.48	-0.046	0.68	-0.071	0.52	-0.13	0.26	-0.25	0.022	-0.26	0.02	-0.12	0.27
GOLGA3	blue	-0.13	0.25	0.13	0.25	0.053	0.63	0.28	0.011	0.21	0.052	-0.043	0.7	-0.11	0.34	-0.21	0.052	-0.16	0.16	-0.087	0.43	-0.026	0.81
GNL1	blue	-0.022	0.84	0.022	0.84	0.043	0.7	-0.073	0.51	-0.047	0.67	-0.11	0.34	-0.011	0.92	0.019	0.86	-0.095	0.39	-0.11	0.34	0.015	0.89
SPAG1	blue	0.0029	0.98	-0.0029	0.98	-0.0093	0.93	0.19	0.087	0.16	0.15	0.12	0.27	-0.036	0.74	-0.35	0.0013	0.0044	0.97	-0.15	0.18	0.013	0.9
LEMD3	blue	0.043	0.7	-0.043	0.7	0.081	0.46	0.041	0.71	-0.016	0.89	0.069	0.54	0.037	0.74	-0.062	0.58	0.0018	0.99	0.089	0.42	0.1	0.37
MPZL2	blue	0.028	0.8	-0.028	0.8	-0.28	0.011	0.23	0.037	0.04	0.72	0.47	7.4e-06	0.25	0.024	-0.4	0.00021	-0.065	0.56	-0.36	0.00072	-0.083	0.46
UCP2	blue	0.015	0.89	-0.015	0.89	0.33	0.0021	0.24	0.032	0.46	1.5e-05	-0.28	0.01	-0.13	0.25	0.091	0.42	0.092	0.41	0.28	0.0094	0.29	0.0083
ST3GAL1	blue	0.044	0.69	-0.044	0.69	0.19	0.08	-0.022	0.84	0.19	0.086	0.012	0.91	0.15	0.16	0.1	0.37	-0.11	0.31	0.22	0.044	0.12	0.29
SRA1	blue	-0.051	0.65	0.051	0.65	-0.29	0.008	0.17	0.13	0.0055	0.96	0.21	0.063	0.054	0.63	-0.23	0.034	-0.07	0.53	-0.15	0.17	-0.034	0.76
FAM126B	blue	-0.056	0.61	0.056	0.61	-0.23	0.034	0.14	0.21	-0.034	0.76	0.3	0.0067	0.21	0.059	-0.21	0.061	-0.00082	0.99	-0.27	0.012	-0.19	0.081
IGDCC4	blue	0.17	0.12	-0.17	0.12	0.57	1.3e-08	-0.059	0.6	0.3	0.0068	-0.23	0.034	-0.082	0.46	0.16	0.16	0.067	0.55	0.69	3.5e-13	0.39	0.00029
C1orf53	blue	-0.013	0.91	0.013	0.91	-0.029	0.79	-0.064	0.57	-0.073	0.51	-0.13	0.23	-0.0057	0.96	0.11	0.32	-0.017	0.88	0.15	0.18	0.061	0.59
SPSB2	blue	-0.18	0.1	0.18	0.1	-0.038	0.73	0.18	0.11	0.0094	0.93	-0.12	0.28	-0.13	0.23	-0.093	0.4	-0.048	0.67	-0.18	0.11	-0.026	0.82
TERF2IP	blue	-0.031	0.78	0.031	0.78	0.13	0.25	0.036	0.74	0.08	0.47	0.04	0.72	-0.038	0.73	-0.1	0.37	0.011	0.92	0.23	0.037	0.013	0.91
SLC2A4	blue	0.49	2e-06	-0.49	2e-06	0.13	0.24	-0.25	0.024	-0.066	0.55	-0.23	0.034	0.1	0.37	0.2	0.071	0.21	0.062	0.83	8.8e-22	0.57	2.4e-08
CCM2L	blue	0.32	0.003	-0.32	0.003	0.2	0.066	0.029	0.8	0.18	0.11	-0.2	0.064	-0.059	0.59	0.025	0.82	0.023	0.83	0.7	1.9e-13	0.38	0.0004
HYAL1	blue	-0.089	0.42	0.089	0.42	0.096	0.39	0.19	0.083	0.15	0.16	0.088	0.43	-0.23	0.037	-0.26	0.02	-0.0048	0.97	-0.11	0.31	0.0092	0.93
CAV3	blue	0.28	0.0091	-0.28	0.0091	0.2	0.067	-0.11	0.31	0.032	0.77	-0.26	0.017	-0.06	0.59	0.091	0.41	0.0056	0.96	0.85	1.4e-24	0.3	0.0055
MYLIP	blue	0.25	0.021	-0.25	0.021	0.043	0.7	0.077	0.49	0.13	0.24	-0.11	0.34	0.11	0.34	0.072	0.52	0.17	0.12	0.24	0.03	0.26	0.017
PLPPR2	blue	-0.11	0.31	0.11	0.31	0.27	0.014	0.076	0.49	0.12	0.3	0.059	0.6	-0.24	0.032	-0.19	0.093	-0.039	0.73	0.13	0.23	-0.0024	0.98
ELP5	blue	0.13	0.23	-0.13	0.23	0.057	0.61	0.11	0.34	0.13	0.26	-0.24	0.031	-0.15	0.18	-0.1	0.37	-0.055	0.62	0.32	0.0029	0.065	0.56
KCTD12	blue	0.13	0.26	-0.13	0.26	0.31	0.0043	0.21	0.054	0.35	0.0011	-0.15	0.18	-0.23	0.041	-0.28	0.011	-0.017	0.88	0.31	0.005	0.19	0.084
TAF6L	blue	-0.096	0.39	0.096	0.39	-0.044	0.7	0.083	0.46	0.012	0.91	-0.1	0.36	-0.13	0.25	-0.06	0.59	-0.097	0.38	-0.044	0.69	-0.011	0.92
NARF	blue	-0.042	0.71	0.042	0.71	-0.023	0.84	0.18	0.098	0.035	0.75	-0.018	0.87	-0.011	0.92	-0.19	0.084	0.01	0.93	-0.056	0.61	0.051	0.64
LUC7L	blue	0.099	0.37	-0.099	0.37	-0.14	0.21	0.21	0.054	0.23	0.035	0.0024	0.98	0.032	0.77	-0.15	0.18	0.12	0.29	-0.1	0.35	0.02	0.86
SDR42E1	blue	0.054	0.63	-0.054	0.63	-0.11	0.31	-0.013	0.91	-0.083	0.45	0.21	0.061	0.12	0.28	-0.039	0.73	0.12	0.29	-0.15	0.18	-0.056	0.62
SEMA6C	blue	0.24	0.029	-0.24	0.029	0.17	0.12	-0.29	0.007	-0.062	0.58	-0.21	0.061	0.046	0.68	0.32	0.0031	0.14	0.22	0.71	8.7e-14	0.33	0.0024
EXOSC6	blue	0.065	0.56	-0.065	0.56	-0.15	0.18	0.26	0.018	0.094	0.4	-0.11	0.33	-0.11	0.33	-0.16	0.14	-0.11	0.3	-0.13	0.24	0.085	0.45
TSPYL5	blue	0.41	0.0001	-0.41	0.0001	0.45	2.3e-05	-0.14	0.2	0.23	0.039	-0.13	0.24	0.089	0.42	0.22	0.051	0.45	1.9e-05	0.54	1.5e-07	0.67	3.3e-12
VPS39	blue	-0.013	0.91	0.013	0.91	0.086	0.44	0.11	0.31	0.081	0.47	-0.049	0.66	-0.11	0.31	-0.17	0.12	0.1	0.36	0.13	0.23	0.066	0.56
COQ10A	blue	0.19	0.079	-0.19	0.079	0.085	0.44	-0.0043	0.97	0.059	0.59	-0.42	6.7e-05	-0.099	0.37	0.07	0.53	-0.019	0.86	0.56	4.1e-08	0.36	0.00089
JARID2	blue	-0.43	5.6e-05	0.43	5.6e-05	-0.058	0.6	0.31	0.0038	0.055	0.62	0.2	0.07	-0.17	0.12	-0.37	0.00062	-0.25	0.022	-0.43	6.1e-05	-0.38	0.00048
ATP5ME	blue	0.18	0.1	-0.18	0.1	-0.14	0.22	-0.069	0.53	-0.066	0.55	-0.095	0.39	0.11	0.32	0.068	0.54	0.058	0.6	0.18	0.098	0.19	0.078
UBE2A	blue	-0.17	0.13	0.17	0.13	-0.19	0.078	0.17	0.12	-0.054	0.63	-0.17	0.13	-0.18	0.095	-0.2	0.073	-0.16	0.14	-0.27	0.012	-0.24	0.026
MYO9A	blue	0.12	0.26	-0.12	0.26	0.12	0.29	-0.061	0.58	-0.053	0.63	0.062	0.58	-0.043	0.7	-0.13	0.25	0.12	0.28	0.17	0.13	0.12	0.3
MVK	blue	-0.028	0.8	0.028	0.8	-0.19	0.084	-0.00082	0.99	-0.15	0.18	0.3	0.006	0.26	0.018	-0.082	0.46	0.044	0.69	-0.25	0.023	-0.018	0.87
AIDA	blue	0.054	0.63	-0.054	0.63	0.19	0.092	-0.039	0.73	-0.032	0.77	0.023	0.84	0.01	0.93	-0.11	0.3	-0.021	0.85	0.2	0.073	0.0019	0.99
GPKOW	blue	0.03	0.79	-0.03	0.79	0.12	0.28	0.14	0.21	0.14	0.2	-0.11	0.33	-0.15	0.17	-0.21	0.054	-0.076	0.49	0.17	0.12	0.069	0.54
PKIG	blue	0.12	0.3	-0.12	0.3	0.44	2.7e-05	0.082	0.46	0.37	0.00051	-0.19	0.079	-0.22	0.048	-0.037	0.74	0.2	0.071	0.36	0.0007	0.3	0.0057
RHOV	blue	0.07	0.53	-0.07	0.53	-0.38	0.00044	0.23	0.041	0.034	0.76	0.39	0.00026	0.29	0.0088	-0.29	0.0082	-0.092	0.41	-0.34	0.0017	0.094	0.4
QPCTL	blue	-0.054	0.63	0.054	0.63	-0.19	0.091	-0.25	0.021	-0.28	0.012	-0.26	0.019	-0.087	0.44	0.2	0.073	0.022	0.85	-0.17	0.12	-0.059	0.6
SGTA	blue	0.17	0.13	-0.17	0.13	-0.23	0.034	-0.059	0.59	-0.18	0.097	-0.077	0.49	0.033	0.77	-0.093	0.4	-0.011	0.92	0.018	0.87	0.056	0.61
UBL4A	blue	-0.056	0.61	0.056	0.61	0.035	0.75	0.02	0.86	-0.0073	0.95	-0.047	0.67	-0.17	0.13	-0.11	0.34	-0.11	0.32	0.12	0.3	-0.082	0.46
FZD5	blue	-0.18	0.11	0.18	0.11	0.058	0.6	0.044	0.69	0.011	0.92	-0.035	0.75	-0.21	0.052	-0.12	0.3	-0.038	0.73	-0.15	0.19	-0.095	0.39
MCAT	blue	0.009	0.94	-0.009	0.94	-0.37	0.00049	-0.032	0.77	-0.17	0.13	0.0089	0.94	0.06	0.59	-0.052	0.64	-0.021	0.85	-0.19	0.09	-0.069	0.54
SLC7A11	blue	-0.33	0.0022	0.33	0.0022	-0.18	0.11	0.047	0.68	-0.085	0.44	0.086	0.44	-0.047	0.67	-0.068	0.54	-0.27	0.015	-0.37	0.0005	-0.39	0.00032
KRT6A	blue	-0.38	0.00033	0.38	0.00033	-0.11	0.33	0.19	0.086	-0.023	0.84	0.56	4.3e-08	-0.033	0.77	-0.41	0.00013	-0.31	0.005	-0.48	3.8e-06	-0.63	1.2e-10
CCL2	blue	0.35	0.001	-0.35	0.001	0.31	0.0037	0.13	0.23	0.45	1.8e-05	-0.27	0.015	-0.04	0.72	-0.0039	0.97	0.19	0.082	0.48	5.4e-06	0.52	5.9e-07
MMS19	blue	-0.018	0.87	0.018	0.87	0.13	0.23	-0.033	0.77	0.061	0.58	-0.16	0.14	-0.14	0.21	-0.053	0.63	0.037	0.74	0.23	0.033	0.035	0.75
NFIX	blue	0.35	0.0012	-0.35	0.0012	-0.0093	0.93	-0.058	0.6	0.09	0.42	-0.071	0.52	0.25	0.025	0.044	0.69	0.12	0.26	0.36	0.00099	0.33	0.0027
HSPA12B	blue	0.11	0.34	-0.11	0.34	0.55	5.8e-08	-0.058	0.6	0.31	0.0047	-0.33	0.0021	-0.19	0.082	0.15	0.17	0.077	0.49	0.61	1.4e-09	0.39	0.0003
MFAP4	blue	0.41	0.00011	-0.41	0.00011	0.45	1.9e-05	-0.23	0.037	0.11	0.34	-0.16	0.15	0.14	0.22	0.29	0.0085	0.26	0.016	0.72	1e-14	0.53	2.4e-07
PRAG1	blue	-0.09	0.42	0.09	0.42	-0.16	0.16	0.35	0.0013	0.073	0.51	0.3	0.0062	-0.06	0.59	-0.45	1.8e-05	-0.015	0.9	-0.34	0.0017	-0.075	0.5
PACS1	blue	-0.13	0.23	0.13	0.23	-0.055	0.62	0.31	0.0041	0.15	0.19	-0.061	0.58	-0.21	0.061	-0.24	0.027	-0.12	0.27	-0.17	0.14	-0.045	0.69
OSBPL8	blue	0.04	0.72	-0.04	0.72	0.14	0.19	0.1	0.35	0.15	0.17	-0.038	0.74	0.031	0.78	-0.11	0.32	0.044	0.69	0.26	0.016	0.19	0.085
GALNT14	blue	-0.14	0.2	0.14	0.2	-0.029	0.79	-0.031	0.78	-0.066	0.55	0.013	0.91	-0.069	0.54	-0.038	0.73	-0.16	0.16	-0.25	0.022	-0.21	0.055
MKRN3	blue	-0.28	0.011	0.28	0.011	-0.089	0.43	0.087	0.43	-0.084	0.45	-0.12	0.27	-0.14	0.2	-0.012	0.91	-0.19	0.087	-0.23	0.037	-0.17	0.12
LONRF2	blue	0.53	2.6e-07	-0.53	2.6e-07	0.22	0.043	-0.31	0.0044	-0.021	0.85	-0.24	0.028	0.14	0.2	0.34	0.0015	0.28	0.012	0.8	4.9e-20	0.6	2.5e-09
EPHB3	blue	-0.07	0.53	0.07	0.53	-0.19	0.083	-0.084	0.45	-0.084	0.45	0.3	0.006	0.097	0.38	0.00035	1	-0.12	0.27	-0.27	0.012	-0.088	0.43
STAC	blue	0.015	0.89	-0.015	0.89	0.19	0.094	-0.07	0.53	0.023	0.84	-0.27	0.015	-0.27	0.013	0.0098	0.93	-0.049	0.66	0.38	0.00039	0.056	0.61
TBC1D9B	blue	-0.11	0.32	0.11	0.32	-0.098	0.38	0.14	0.21	0.041	0.72	-0.038	0.73	-0.097	0.38	-0.17	0.13	-0.12	0.29	-0.15	0.17	-0.033	0.77
PAFAH1B2	blue	-0.027	0.81	0.027	0.81	-0.059	0.59	0.07	0.53	0.028	0.8	-0.019	0.86	-0.026	0.82	-0.21	0.061	-0.065	0.56	-0.1	0.36	0.0027	0.98
ZIC1	blue	-0.053	0.63	0.053	0.63	-0.055	0.62	-0.17	0.13	-0.19	0.081	0.022	0.84	0.03	0.79	0.11	0.32	-0.015	0.89	0.19	0.082	0.058	0.6
SF3B3	blue	-0.095	0.39	0.095	0.39	-0.26	0.019	-0.069	0.53	-0.28	0.011	-0.055	0.62	-0.00018	1	0.088	0.43	0.014	0.9	-0.2	0.071	-0.067	0.55
CAND2	blue	0.31	0.0038	-0.31	0.0038	0.053	0.63	-0.24	0.03	-0.11	0.34	-0.22	0.042	0.072	0.52	0.27	0.012	0.023	0.84	0.66	1e-11	0.38	0.00047
UBE4B	blue	-0.014	0.9	0.014	0.9	-0.16	0.14	-0.08	0.47	-0.087	0.44	0.18	0.094	0.12	0.29	0.099	0.38	-0.12	0.28	-0.15	0.18	-0.051	0.65
MROH6	blue	-0.056	0.61	0.056	0.61	-0.44	2.7e-05	-0.04	0.72	-0.3	0.0055	0.27	0.014	0.045	0.68	-0.25	0.025	-0.19	0.088	-0.41	0.00011	-0.29	0.0086
TM2D1	blue	0.21	0.063	-0.21	0.063	-0.089	0.42	-0.12	0.27	-0.13	0.25	-0.1	0.35	0.12	0.27	0.067	0.54	0.14	0.22	0.26	0.016	0.28	0.0092
CTSB	blue	-0.3	0.0059	0.3	0.0059	0.075	0.5	0.26	0.018	0.16	0.16	-0.13	0.24	-0.33	0.0026	-0.22	0.045	-0.16	0.15	-0.2	0.071	-0.13	0.23
TRAF7	blue	-0.29	0.0087	0.29	0.0087	-0.081	0.47	0.083	0.45	-0.0074	0.95	0.0069	0.95	-0.11	0.33	-0.078	0.48	-0.27	0.013	-0.3	0.0055	-0.23	0.04
STRN4	blue	-0.11	0.31	0.11	0.31	-0.1	0.37	-0.063	0.57	-0.12	0.29	0.16	0.16	0.09	0.42	0.025	0.83	-0.05	0.65	-0.25	0.025	-0.1	0.37
DOCK6	blue	-0.26	0.017	0.26	0.017	0.12	0.29	0.28	0.01	0.3	0.0057	0.17	0.12	-0.16	0.16	-0.23	0.034	-0.091	0.41	-0.25	0.023	-0.2	0.076
TMEM35B	blue	0.021	0.85	-0.021	0.85	0.23	0.037	0.031	0.78	0.044	0.69	-0.18	0.096	-0.19	0.086	-0.018	0.87	-0.049	0.66	0.31	0.0045	0.22	0.042
ZFAT	blue	0.028	0.8	-0.028	0.8	0.003	0.98	0.17	0.12	0.046	0.68	-0.12	0.27	-0.12	0.29	-0.084	0.45	-0.15	0.18	0.26	0.018	0.12	0.27
GPHN	blue	-0.0012	0.99	0.0012	0.99	-0.1	0.37	0.039	0.72	-0.06	0.59	-0.07	0.53	0.016	0.89	-0.068	0.54	-0.032	0.77	-0.1	0.37	0.041	0.71
CENPM	blue	-0.25	0.025	0.25	0.025	-0.27	0.015	-0.034	0.76	-0.16	0.14	-0.041	0.71	-0.039	0.72	0.073	0.51	-0.064	0.57	-0.28	0.012	-0.24	0.027
PAOX	blue	-0.0099	0.93	0.0099	0.93	-0.16	0.16	0.054	0.63	0.018	0.87	0.17	0.12	0.18	0.11	0.06	0.59	-0.076	0.5	-0.15	0.19	0.054	0.63
COMMD3	blue	0.24	0.032	-0.24	0.032	0.034	0.76	-0.15	0.19	-0.016	0.88	-0.18	0.097	0.086	0.44	0.18	0.1	0.049	0.66	0.34	0.002	0.32	0.0029
ADAMTS1	blue	0.14	0.21	-0.14	0.21	0.28	0.0097	-0.25	0.021	-0.072	0.52	-0.28	0.01	-0.19	0.084	0.14	0.21	0.088	0.43	0.5	1.5e-06	0.17	0.12
ZNF568	blue	0.31	0.0041	-0.31	0.0041	0.035	0.75	-0.25	0.021	-0.08	0.47	-0.13	0.23	0.19	0.084	0.12	0.28	0.098	0.38	0.28	0.011	0.27	0.012
GYS1	blue	-0.19	0.087	0.19	0.087	-0.014	0.9	0.078	0.48	-0.079	0.48	0.015	0.89	-0.18	0.095	-0.24	0.028	-0.15	0.18	0.14	0.2	-0.13	0.24
FBXL4	blue	-0.067	0.55	0.067	0.55	0.17	0.12	-0.18	0.1	-0.18	0.1	-0.15	0.18	-0.11	0.31	0.15	0.17	0.053	0.63	0.089	0.42	-0.0034	0.98
LIMCH1	blue	0.24	0.029	-0.24	0.029	0.3	0.0066	-0.21	0.06	-0.015	0.89	-0.15	0.17	0.14	0.21	0.18	0.11	0.1	0.36	0.54	1.5e-07	0.49	3e-06
TDRD7	blue	-0.075	0.5	0.075	0.5	-0.14	0.2	0.39	0.00029	0.12	0.27	-0.049	0.66	-0.14	0.21	-0.28	0.011	-0.15	0.18	-0.17	0.12	-0.09	0.42
SMIM10L1	blue	-0.03	0.79	0.03	0.79	0.019	0.86	-0.062	0.58	-0.14	0.2	-0.24	0.027	-0.054	0.63	0.21	0.058	-0.043	0.7	0.24	0.027	0.18	0.095
SUPT4H1	blue	-0.16	0.16	0.16	0.16	-0.062	0.57	0.098	0.38	-0.037	0.74	-0.0021	0.99	-0.037	0.74	-0.0091	0.94	0.018	0.87	-0.091	0.41	0.0044	0.97
REXO2	blue	0.13	0.25	-0.13	0.25	-0.074	0.5	0.075	0.5	-0.0061	0.96	0.19	0.086	0.079	0.48	-0.21	0.055	-0.091	0.41	0.16	0.14	0.13	0.25
CASC3	blue	0.087	0.44	-0.087	0.44	0.04	0.72	-0.17	0.13	-0.084	0.45	-0.045	0.69	0.044	0.69	0.25	0.021	0.092	0.41	0.23	0.039	0.16	0.14
ANAPC10	blue	0.074	0.51	-0.074	0.51	0.03	0.79	-0.19	0.089	-0.17	0.12	-0.27	0.014	-0.033	0.76	0.17	0.12	-0.0031	0.98	0.27	0.013	0.15	0.17
RSAD1	blue	-0.019	0.87	0.019	0.87	0.068	0.54	-0.072	0.52	-0.025	0.83	-0.071	0.52	-0.087	0.44	0.022	0.84	0.062	0.58	0.11	0.34	0.13	0.24
ZBTB41	blue	-0.099	0.37	0.099	0.37	0.2	0.075	-0.096	0.39	-0.08	0.47	-0.16	0.14	-0.1	0.35	0.12	0.29	-0.075	0.5	0.14	0.19	0.073	0.51
ASB7	blue	-0.2	0.075	0.2	0.075	0.051	0.65	-0.054	0.63	-0.056	0.61	-0.0049	0.96	-0.084	0.45	0.12	0.28	-0.092	0.41	-0.12	0.27	-0.039	0.73
TEX261	blue	0.15	0.16	-0.15	0.16	0.037	0.74	-0.2	0.073	-0.2	0.072	-0.014	0.9	-0.094	0.4	-0.055	0.62	0.1	0.37	0.14	0.2	0.12	0.28
ARNT2	blue	0.16	0.14	-0.16	0.14	0.36	0.00095	-0.35	0.0012	-0.053	0.63	-0.27	0.013	-0.033	0.77	0.38	0.00044	0.2	0.076	0.51	9.2e-07	0.4	0.00018
U2SURP	blue	-0.21	0.061	0.21	0.061	-0.099	0.37	0.078	0.48	-0.17	0.14	0.037	0.74	-0.078	0.48	-0.11	0.32	-0.11	0.34	-0.19	0.087	-0.15	0.19
TAGLN2	blue	-0.21	0.057	0.21	0.057	0.033	0.77	0.21	0.053	0.079	0.48	0.12	0.27	-0.15	0.19	-0.21	0.056	-0.15	0.17	-0.24	0.027	-0.15	0.17
MILR1	blue	0.14	0.19	-0.14	0.19	0.27	0.015	0.26	0.018	0.4	0.00019	-0.23	0.037	-0.085	0.45	-0.073	0.51	-0.01	0.93	0.42	6.3e-05	0.35	0.0012
USP10	blue	-0.04	0.72	0.04	0.72	-0.055	0.62	0.083	0.45	-0.0049	0.97	-0.17	0.13	-0.1	0.37	-0.031	0.78	-0.059	0.6	0.096	0.39	0.095	0.39
DNAH11	blue	0.026	0.82	-0.026	0.82	-0.00013	1	-0.34	0.0015	-0.25	0.021	-0.17	0.13	0.019	0.86	0.39	0.00025	0.053	0.63	0.18	0.11	0.12	0.3
NUDT22	blue	0.051	0.65	-0.051	0.65	0.074	0.5	-0.18	0.11	-0.17	0.12	-0.14	0.21	-0.09	0.42	0.018	0.87	0.039	0.72	0.11	0.31	0.088	0.43
CHODL	blue	-0.024	0.83	0.024	0.83	-0.015	0.9	-0.22	0.051	-0.21	0.053	-0.056	0.62	0.096	0.39	0.25	0.022	0.044	0.69	0.13	0.24	0.099	0.37
ZFAND6	blue	-0.03	0.79	0.03	0.79	-0.01	0.93	0.0034	0.98	-0.055	0.62	0.13	0.24	0.12	0.29	0.015	0.89	0.011	0.92	0.1	0.35	0.058	0.6
KLHL30	blue	0.17	0.12	-0.17	0.12	0.29	0.0072	-0.14	0.22	0.032	0.77	-0.3	0.006	-0.13	0.25	0.16	0.15	-0.016	0.88	0.75	1.7e-16	0.25	0.02
RIT1	blue	-0.16	0.14	0.16	0.14	-0.15	0.19	-0.073	0.51	-0.1	0.35	0.19	0.091	0.27	0.014	0.2	0.069	-0.097	0.38	-0.21	0.054	-0.074	0.51
SUMO3	blue	-0.22	0.045	0.22	0.045	-0.17	0.13	0.15	0.16	-0.083	0.46	0.12	0.27	0.039	0.72	-0.15	0.18	-0.086	0.44	-0.27	0.012	-0.14	0.2
MTMR4	blue	-0.0082	0.94	0.0082	0.94	-0.083	0.46	-0.11	0.32	-0.22	0.05	0.06	0.59	-0.046	0.68	0.073	0.51	0.041	0.71	0.059	0.6	0.023	0.84
MBP	blue	0.24	0.029	-0.24	0.029	0.048	0.66	0.097	0.38	0.081	0.47	0.12	0.28	0.011	0.92	-0.19	0.084	0.14	0.21	0.21	0.054	0.21	0.063
RTKN	blue	-0.12	0.26	0.12	0.26	-0.049	0.66	0.001	0.99	-0.094	0.4	0.085	0.45	-0.15	0.17	-0.039	0.72	-0.14	0.2	-0.16	0.14	-0.08	0.47
TSPYL1	blue	0.15	0.19	-0.15	0.19	-0.024	0.83	0.14	0.19	0.024	0.83	0.049	0.66	-0.062	0.58	-0.2	0.071	0.027	0.81	0.17	0.12	0.15	0.19
TTC13	blue	-0.077	0.49	0.077	0.49	0.045	0.69	-0.11	0.34	-0.17	0.13	0.00083	0.99	-0.027	0.81	0.11	0.33	-0.083	0.46	0.094	0.4	0.026	0.82
LEPR	blue	0.15	0.19	-0.15	0.19	0.27	0.013	-0.013	0.91	0.11	0.34	-0.083	0.45	-0.059	0.6	-0.022	0.84	-0.034	0.76	0.4	0.00016	0.2	0.074
RAB9A	blue	-0.047	0.67	0.047	0.67	-0.13	0.26	-0.026	0.82	-0.12	0.27	0.2	0.072	0.12	0.26	-0.06	0.59	0.029	0.79	-0.13	0.24	-0.015	0.9
TLE1	blue	-0.074	0.51	0.074	0.51	0.11	0.33	-0.037	0.74	0.0025	0.98	-0.016	0.89	-0.086	0.44	0.082	0.46	-0.012	0.91	0.19	0.08	0.018	0.87
PLK2	blue	0.073	0.51	-0.073	0.51	-0.25	0.021	0.21	0.052	0.04	0.72	0.24	0.026	-0.0022	0.98	-0.43	4.7e-05	-0.076	0.49	-0.25	0.022	-0.031	0.78
STOML2	blue	0.071	0.53	-0.071	0.53	-0.23	0.037	-0.2	0.067	-0.22	0.047	0.051	0.64	0.12	0.29	-0.082	0.46	-0.035	0.75	-0.15	0.17	-0.07	0.53
JAM3	blue	0.32	0.0036	-0.32	0.0036	0.5	1.3e-06	-0.16	0.16	0.16	0.14	-0.34	0.0016	-0.091	0.41	0.25	0.023	0.14	0.21	0.73	3.9e-15	0.56	3.3e-08
MASTL	blue	-0.13	0.24	0.13	0.24	-0.24	0.032	0.08	0.47	-0.085	0.44	0.045	0.68	-0.023	0.84	-0.023	0.84	0.004	0.97	-0.26	0.016	-0.13	0.23
SLC29A2	blue	0.13	0.23	-0.13	0.23	0.033	0.77	-0.27	0.013	-0.22	0.043	-0.34	0.0016	0.0012	0.99	0.39	0.00024	0.09	0.42	0.45	1.7e-05	0.33	0.0021
BMP6	blue	0.11	0.33	-0.11	0.33	0.39	0.00023	-0.19	0.089	0.16	0.16	-0.23	0.038	-0.11	0.32	0.33	0.0021	0.037	0.74	0.53	2.9e-07	0.3	0.0055
SCAF1	blue	-0.065	0.56	0.065	0.56	-0.17	0.12	-0.25	0.02	-0.38	0.00044	0.075	0.5	0.0029	0.98	0.031	0.78	-0.15	0.17	-0.16	0.14	-0.12	0.28
ZCCHC17	blue	-0.053	0.63	0.053	0.63	-0.069	0.53	-0.072	0.52	-0.17	0.12	0.061	0.58	0.015	0.89	0.047	0.67	-0.053	0.64	0.12	0.28	-0.047	0.67
TNFAIP1	blue	-0.044	0.69	0.044	0.69	-0.24	0.029	-0.038	0.73	-0.27	0.015	0.19	0.092	0.1	0.37	-0.045	0.68	0.14	0.21	-0.29	0.0088	-0.11	0.32
TMEM38B	blue	-0.056	0.62	0.056	0.62	0.019	0.87	-0.083	0.46	-0.033	0.77	-0.27	0.014	-0.064	0.57	0.19	0.085	-0.17	0.12	0.27	0.014	-0.026	0.82
PNN	blue	-0.082	0.46	0.082	0.46	-0.25	0.021	-0.0016	0.99	-0.16	0.16	-0.12	0.28	-0.029	0.8	0.091	0.41	-0.1	0.36	-0.23	0.034	-0.15	0.19
POLR2J	blue	-0.034	0.76	0.034	0.76	-0.00091	0.99	-0.19	0.079	-0.21	0.058	-0.16	0.15	0.0029	0.98	0.36	0.00085	-0.12	0.29	0.17	0.12	0.005	0.96
ADAT2	blue	-0.044	0.69	0.044	0.69	-0.24	0.027	-0.036	0.75	-0.19	0.091	-0.027	0.81	-0.17	0.12	-0.099	0.37	-0.077	0.49	-0.18	0.1	-0.16	0.16
TIMM10	blue	-0.06	0.59	0.06	0.59	-0.3	0.0063	-0.11	0.31	-0.23	0.039	-0.099	0.37	0.012	0.91	0.094	0.4	-0.13	0.23	-0.11	0.31	-0.066	0.55
STX5	blue	-0.025	0.82	0.025	0.82	-0.18	0.11	-0.028	0.8	-0.092	0.41	0.0027	0.98	-0.0081	0.94	0.056	0.62	-0.013	0.91	-0.11	0.33	0.0056	0.96
TVP23B	blue	-0.041	0.71	0.041	0.71	0.032	0.78	0.067	0.55	-0.091	0.41	0.13	0.25	0.045	0.69	-0.13	0.24	-0.076	0.5	0.12	0.26	-0.014	0.9
TNFRSF11B	blue	-0.14	0.21	0.14	0.21	0.3	0.0059	-0.16	0.16	0.048	0.67	0.054	0.63	-0.096	0.39	0.092	0.41	0.0089	0.94	0.11	0.31	-0.071	0.52
TDRD5	blue	-0.17	0.12	0.17	0.12	-0.074	0.51	0.032	0.77	-0.062	0.58	0.1	0.37	0.051	0.64	0.0045	0.97	-0.083	0.46	-0.15	0.16	-0.02	0.85
NUDT4	blue	0.1	0.36	-0.1	0.36	0.089	0.42	-0.12	0.3	0.017	0.88	-0.17	0.13	0.021	0.85	0.22	0.044	-0.043	0.7	0.35	0.0013	0.29	0.0075
CNST	blue	0.062	0.58	-0.062	0.58	0.094	0.4	-0.18	0.11	-0.044	0.69	0.018	0.87	0.11	0.34	0.12	0.26	-0.13	0.25	0.15	0.19	-0.02	0.86
SCAND1	blue	-0.06	0.59	0.06	0.59	-0.063	0.57	-0.13	0.24	-0.075	0.5	-0.024	0.83	0.037	0.74	0.23	0.037	0.075	0.5	-0.14	0.21	0.053	0.64
PIWIL2	blue	-0.05	0.65	0.05	0.65	-0.075	0.5	-0.24	0.03	-0.28	0.01	-0.18	0.11	0.024	0.83	0.21	0.058	-0.034	0.76	0.082	0.46	-0.0029	0.98
HECA	blue	-0.094	0.4	0.094	0.4	0.11	0.3	-0.14	0.22	-0.065	0.56	0.12	0.28	0.03	0.79	0.14	0.2	-0.069	0.53	0.15	0.18	0.033	0.77
PTCD3	blue	-0.011	0.92	0.011	0.92	0.091	0.41	0.0055	0.96	-0.028	0.8	-0.22	0.047	-0.18	0.1	0.01	0.93	0.042	0.7	0.28	0.0099	0.1	0.35
UPF3A	blue	0.11	0.31	-0.11	0.31	-0.34	0.0019	-0.053	0.63	-0.16	0.14	0.1	0.35	0.067	0.55	-0.16	0.16	-0.072	0.52	-0.19	0.082	-0.15	0.18
ZFAND5	blue	0.15	0.18	-0.15	0.18	0.17	0.12	-0.0042	0.97	0.089	0.43	-0.055	0.62	0.11	0.3	0.11	0.33	0.074	0.5	0.3	0.0066	0.27	0.012
PDK4	blue	0.59	5e-09	-0.59	5e-09	0.25	0.024	-0.23	0.036	0.023	0.83	-0.11	0.32	0.15	0.19	0.12	0.3	0.38	0.00033	0.81	7.3e-21	0.62	4.1e-10
POLR2I	blue	-0.00017	1	0.00017	1	-0.12	0.27	-0.067	0.55	-0.13	0.24	-0.057	0.61	0.019	0.86	0.17	0.13	0.049	0.66	0.12	0.28	0.04	0.72
ZKSCAN3	blue	0.087	0.44	-0.087	0.44	0.076	0.5	0.0045	0.97	0.057	0.61	-0.2	0.072	-0.0012	0.99	0.19	0.089	-0.024	0.83	0.23	0.039	0.27	0.015
MYO1C	blue	-0.081	0.47	0.081	0.47	0.045	0.68	0.096	0.39	0.014	0.9	0.041	0.71	-0.09	0.42	-0.11	0.34	-0.065	0.56	-0.17	0.13	0.076	0.5
RETREG1	blue	0.2	0.064	-0.2	0.064	0.24	0.026	-0.22	0.046	-0.12	0.26	-0.3	0.0064	-0.11	0.32	0.11	0.31	0.3	0.0058	0.56	3.7e-08	0.32	0.0031
SURF2	blue	-0.23	0.04	0.23	0.04	-0.26	0.02	-0.071	0.52	-0.29	0.0074	0.18	0.1	-0.0034	0.98	0.04	0.72	-0.14	0.21	-0.33	0.0024	-0.24	0.027
NSRP1	blue	0.084	0.45	-0.084	0.45	-0.014	0.9	-0.023	0.84	-0.016	0.89	-0.13	0.26	-0.057	0.61	0.089	0.43	0.22	0.041	0.19	0.09	0.15	0.16
RPL8	blue	0.0043	0.97	-0.0043	0.97	-0.22	0.05	-0.11	0.34	-0.17	0.12	0.12	0.3	0.11	0.33	0.029	0.79	-0.064	0.56	-0.21	0.062	-0.12	0.29
TRIM39	blue	0.21	0.051	-0.21	0.051	-0.25	0.021	-0.035	0.76	-0.2	0.065	-0.02	0.86	0.019	0.87	-0.077	0.49	0.061	0.59	0.14	0.21	0.013	0.91
FGFR1OP	blue	0.03	0.79	-0.03	0.79	-0.15	0.17	0.23	0.033	-0.0008	0.99	0.062	0.58	-0.054	0.63	-0.18	0.11	-0.042	0.7	-0.16	0.15	-0.12	0.3
SHROOM4	blue	0.071	0.52	-0.071	0.52	0.44	2.6e-05	-0.08	0.47	0.2	0.075	-0.091	0.42	0.03	0.79	0.15	0.18	0.068	0.54	0.39	0.00024	0.18	0.11
LAMC1	blue	-0.27	0.014	0.27	0.014	0.3	0.0065	0.05	0.65	0.055	0.62	-0.13	0.24	-0.21	0.054	-0.014	0.9	-0.18	0.11	0.18	0.098	-0.11	0.32
SLC35F5	blue	0.16	0.14	-0.16	0.14	0.01	0.93	-0.11	0.3	-0.12	0.27	0.033	0.77	0.12	0.28	0.013	0.91	0.1	0.36	0.3	0.0053	0.033	0.77
SERINC1	blue	0.17	0.13	-0.17	0.13	0.1	0.36	-0.012	0.91	0.041	0.71	0.1	0.35	0.18	0.11	-0.05	0.65	0.029	0.8	0.21	0.056	0.16	0.15
KLHL18	blue	0.013	0.91	-0.013	0.91	-0.23	0.037	0.12	0.29	-0.077	0.49	0.45	2e-05	0.15	0.17	-0.29	0.008	-0.14	0.19	-0.3	0.006	-0.26	0.019
LYL1	blue	0.012	0.91	-0.012	0.91	0.26	0.018	0.099	0.38	0.28	0.011	-0.2	0.065	-0.13	0.24	0.19	0.091	-0.041	0.71	0.2	0.067	0.19	0.079
THOC3	blue	-0.058	0.6	0.058	0.6	-0.33	0.0024	-0.084	0.45	-0.26	0.018	0.19	0.086	0.18	0.11	0.042	0.7	-0.14	0.21	-0.23	0.034	-0.12	0.28
WTIP	blue	-0.016	0.88	0.016	0.88	0.15	0.16	0.14	0.21	0.18	0.11	-0.16	0.15	-0.25	0.025	-0.1	0.37	-0.079	0.48	0.22	0.048	0.094	0.4
TTI1	blue	0.044	0.69	-0.044	0.69	-0.12	0.26	-0.056	0.62	-0.22	0.046	-0.047	0.68	-0.15	0.17	-0.081	0.47	-0.049	0.66	0.05	0.65	-0.095	0.39
DNAJC21	blue	0.0046	0.97	-0.0046	0.97	0.15	0.18	-0.039	0.73	-0.021	0.85	0.014	0.9	-0.028	0.8	-0.041	0.71	-0.039	0.73	0.15	0.17	-0.029	0.79
TNS4	blue	-0.3	0.0051	0.3	0.0051	-0.35	0.001	0.041	0.71	-0.35	0.0014	0.22	0.044	-0.027	0.81	-0.2	0.07	-0.11	0.32	-0.47	9.2e-06	-0.39	0.00031
SSBP2	blue	0.24	0.03	-0.24	0.03	0.082	0.46	0.026	0.82	0.035	0.75	0.086	0.44	0.23	0.035	0.097	0.38	0.1	0.37	0.26	0.016	0.29	0.0071
ZNF488	blue	-0.1	0.36	0.1	0.36	-0.19	0.092	0.031	0.78	-0.052	0.64	-0.17	0.12	-0.12	0.29	0.049	0.66	0.013	0.91	-0.22	0.043	-0.14	0.21
CLPX	blue	0.072	0.52	-0.072	0.52	0.037	0.74	0.026	0.82	0.045	0.69	0.18	0.097	0.1	0.36	-0.076	0.5	-0.0019	0.99	0.19	0.078	-0.042	0.7
MTRF1	blue	0.24	0.031	-0.24	0.031	-0.0047	0.97	0.1	0.36	0.066	0.55	-0.12	0.26	-0.026	0.81	-0.13	0.25	-0.012	0.92	0.3	0.0052	0.13	0.24
ACTC1	blue	0.13	0.22	-0.13	0.22	0.26	0.018	-0.22	0.041	-0.029	0.8	-0.24	0.032	-0.076	0.49	0.14	0.22	0.0027	0.98	0.62	5e-10	0.098	0.38
OGN	blue	0.33	0.0024	-0.33	0.0024	0.5	1.7e-06	-0.19	0.092	0.19	0.089	-0.27	0.015	0.12	0.29	0.36	0.00088	0.17	0.12	0.67	2.9e-12	0.59	5.6e-09
MOSPD3	blue	0.089	0.42	-0.089	0.42	-0.31	0.0047	-0.0043	0.97	-0.11	0.33	0.12	0.3	0.2	0.073	0.075	0.5	-0.037	0.74	-0.13	0.23	0.012	0.91
PIP4K2A	blue	-0.033	0.77	0.033	0.77	0.28	0.0093	0.13	0.25	0.24	0.026	0.091	0.42	-0.11	0.32	-0.055	0.62	0.12	0.3	0.031	0.78	0.056	0.62
AVL9	blue	-0.2	0.077	0.2	0.077	-0.099	0.37	0.0016	0.99	-0.13	0.24	0.18	0.097	0.004	0.97	-0.051	0.65	-0.056	0.62	-0.25	0.025	-0.24	0.03
CHST14	blue	-0.079	0.48	0.079	0.48	0.39	0.0003	-0.058	0.6	0.031	0.78	-0.33	0.0022	-0.15	0.17	0.24	0.032	0.073	0.51	0.35	0.0014	0.15	0.18
HDAC4	blue	0.14	0.22	-0.14	0.22	-0.0061	0.96	-0.14	0.2	-0.072	0.52	0.042	0.71	0.043	0.7	0.085	0.44	-0.076	0.5	0.29	0.0082	0.032	0.77
RCOR3	blue	0.22	0.042	-0.22	0.042	0.22	0.041	-0.17	0.11	-0.024	0.83	-0.26	0.02	0.047	0.67	0.3	0.0059	0.094	0.4	0.53	2.3e-07	0.36	0.00085
MID1IP1	blue	0.076	0.49	-0.076	0.49	-0.064	0.57	0.16	0.15	0.034	0.76	0.18	0.1	0.08	0.47	-0.14	0.2	-0.09	0.42	0.16	0.14	0.0098	0.93
TAF1C	blue	-0.025	0.82	0.025	0.82	-0.014	0.9	-0.14	0.22	-0.2	0.075	0.013	0.91	0.028	0.8	0.23	0.039	0.11	0.32	-0.1	0.37	0.016	0.89
TSEN15	blue	-0.031	0.78	0.031	0.78	-0.14	0.2	-0.16	0.14	-0.24	0.03	-0.00039	1	0.088	0.43	0.12	0.3	-0.04	0.72	0.099	0.37	-0.039	0.73
CSKMT	blue	-0.062	0.58	0.062	0.58	-0.19	0.078	-0.14	0.21	-0.14	0.2	0.15	0.17	0.078	0.48	0.1	0.36	-0.07	0.53	-0.25	0.022	-0.12	0.27
PADI2	blue	0.51	7.7e-07	-0.51	7.7e-07	0.26	0.019	-0.091	0.41	0.17	0.12	-0.21	0.062	0.088	0.43	0.089	0.42	0.25	0.024	0.82	5.7e-21	0.67	6.2e-12
NDUFA8	blue	0.18	0.11	-0.18	0.11	-0.21	0.06	-0.14	0.21	-0.094	0.4	-0.15	0.16	0.064	0.56	0.2	0.071	0.1	0.37	0.07	0.53	0.089	0.42
SORBS1	blue	0.49	3e-06	-0.49	3e-06	0.31	0.005	-0.094	0.4	0.12	0.28	-0.08	0.47	0.15	0.18	0.13	0.23	0.23	0.039	0.68	1.1e-12	0.65	2.3e-11
KIAA1755	blue	0.14	0.22	-0.14	0.22	0.56	3.3e-08	0.083	0.46	0.47	7.7e-06	-0.43	5.7e-05	-0.24	0.028	0.16	0.14	0.048	0.66	0.5	1.8e-06	0.51	7.5e-07
NEK9	blue	-0.066	0.56	0.066	0.56	0.16	0.15	-0.19	0.083	-0.15	0.17	-0.18	0.095	-0.11	0.32	0.24	0.032	0.063	0.57	0.19	0.094	0.0078	0.94
ARMCX1	blue	0.18	0.11	-0.18	0.11	0.4	0.00017	-0.28	0.01	-0.011	0.92	-0.3	0.0062	-0.12	0.28	0.31	0.0049	0.12	0.27	0.46	1.5e-05	0.32	0.0034
PQBP1	blue	0.19	0.088	-0.19	0.088	-0.026	0.82	-0.17	0.11	-0.055	0.62	-0.16	0.15	0.12	0.3	0.2	0.073	0.13	0.25	0.27	0.013	0.19	0.085
ZNF507	blue	-0.012	0.91	0.012	0.91	0.24	0.03	-0.092	0.41	0.01	0.93	-0.19	0.082	-0.079	0.48	0.13	0.23	0.011	0.92	0.17	0.13	0.059	0.6
SMOC2	blue	0.24	0.029	-0.24	0.029	0.48	3.5e-06	-0.073	0.51	0.11	0.32	-0.23	0.037	0.015	0.9	0.22	0.041	0.32	0.0027	0.45	2e-05	0.52	3.7e-07
CAMTA2	blue	0.078	0.48	-0.078	0.48	0.23	0.036	0.16	0.14	0.17	0.12	0.14	0.2	-0.047	0.67	-0.21	0.06	0.072	0.52	0.25	0.022	0.094	0.4
SPART	blue	0.098	0.38	-0.098	0.38	-0.049	0.66	-0.17	0.13	-0.23	0.04	0.002	0.99	0.031	0.78	0.051	0.65	0.057	0.61	0.18	0.1	0.031	0.78
TMEM237	blue	0.00061	1	-0.00061	1	0.045	0.69	-0.036	0.75	-0.082	0.46	-0.23	0.04	-0.073	0.51	0.14	0.2	-0.067	0.54	0.21	0.054	0.066	0.55
BLOC1S2	blue	-0.078	0.49	0.078	0.49	0.14	0.22	-0.022	0.85	-0.0071	0.95	0.16	0.16	0.028	0.8	0.021	0.85	-0.036	0.75	-0.078	0.48	-0.042	0.71
EPDR1	blue	0.32	0.003	-0.32	0.003	0.52	3.8e-07	-0.14	0.2	0.2	0.064	-0.4	0.00019	-0.11	0.3	0.23	0.034	0.3	0.006	0.72	1.1e-14	0.61	8.9e-10
GRB10	blue	0.11	0.33	-0.11	0.33	0.44	3.7e-05	-0.22	0.044	0.078	0.48	-0.27	0.012	0.05	0.65	0.34	0.0018	0.11	0.32	0.33	0.0022	0.34	0.0017
ERG	blue	-0.11	0.34	0.11	0.34	0.33	0.0025	0.21	0.054	0.24	0.029	-0.067	0.55	-0.29	0.0069	-0.2	0.075	-0.087	0.43	0.27	0.013	-0.081	0.47
ADAM33	blue	0.32	0.003	-0.32	0.003	0.44	2.8e-05	-0.11	0.3	0.17	0.12	-0.033	0.77	0.045	0.68	0.16	0.15	0.17	0.13	0.63	1.9e-10	0.48	3.8e-06
SLC38A4	blue	-0.00091	0.99	0.00091	0.99	0.12	0.29	-0.24	0.031	-0.19	0.078	-0.082	0.46	-0.12	0.29	0.14	0.2	-0.093	0.4	0.21	0.063	-0.047	0.67
DDIT4L	blue	0.47	7.2e-06	-0.47	7.2e-06	0.31	0.0045	-0.21	0.057	0.071	0.52	-0.31	0.0038	0.051	0.65	0.23	0.038	0.2	0.075	0.79	3.5e-19	0.68	1.9e-12
SOS1	blue	-0.05	0.65	0.05	0.65	0.25	0.021	-0.00014	1	0.099	0.37	0.17	0.13	0.1	0.36	0.054	0.63	-0.027	0.81	0.11	0.32	0.045	0.69
HBA2	blue	0.2	0.065	-0.2	0.065	0.24	0.03	-0.033	0.76	0.2	0.07	0.034	0.76	0.026	0.81	-0.043	0.7	0.13	0.22	0.4	0.00021	0.31	0.004
EXD3	blue	0.023	0.84	-0.023	0.84	-0.26	0.016	-0.13	0.26	-0.17	0.13	-0.0071	0.95	0.094	0.4	0.073	0.51	-0.012	0.91	-0.16	0.16	-0.036	0.74
CASQ1	blue	0.43	5.2e-05	-0.43	5.2e-05	0.15	0.19	-0.18	0.1	0.0035	0.97	-0.21	0.063	0.072	0.52	0.12	0.27	0.064	0.56	0.87	2.9e-26	0.4	0.0002
LSM14B	blue	0.25	0.024	-0.25	0.024	-0.11	0.32	-0.16	0.14	-0.26	0.018	0.038	0.73	0.19	0.091	0.014	0.9	0.077	0.49	0.21	0.052	0.15	0.17
LGALS7B	blue	-0.082	0.46	0.082	0.46	-0.24	0.029	-0.0063	0.95	-0.16	0.15	0.48	3.7e-06	0.16	0.16	-0.18	0.11	0.038	0.73	-0.41	0.00014	-0.25	0.021
SERPINF1	blue	0.14	0.2	-0.14	0.2	0.49	2.2e-06	-0.24	0.032	0.11	0.3	-0.11	0.31	-0.065	0.56	0.28	0.0091	0.25	0.025	0.49	2e-06	0.29	0.0084
C1orf159	blue	-0.018	0.87	0.018	0.87	-0.12	0.28	0.053	0.63	-0.054	0.63	0.051	0.65	0.028	0.8	-0.1	0.36	-0.038	0.73	-0.21	0.052	-0.2	0.075
ILKAP	blue	0.21	0.056	-0.21	0.056	-0.12	0.29	-0.18	0.095	-0.25	0.023	-0.19	0.08	0.021	0.85	0.17	0.13	0.084	0.45	0.24	0.026	0.09	0.42
BNIP2	blue	-0.011	0.92	0.011	0.92	0.07	0.53	-0.066	0.56	-0.042	0.7	-0.0023	0.98	-0.054	0.63	-0.0081	0.94	-0.1	0.35	0.2	0.075	-0.14	0.22
LDAH	blue	0.015	0.89	-0.015	0.89	-0.035	0.76	-0.24	0.031	-0.097	0.38	0.096	0.39	0.13	0.23	0.17	0.13	0.0024	0.98	-0.11	0.33	0.045	0.69
DMAC2L	blue	0.23	0.039	-0.23	0.039	-0.18	0.099	-0.12	0.3	-0.15	0.19	-0.093	0.4	0.1	0.36	0.11	0.32	0.022	0.85	0.18	0.1	0.14	0.21
KCTD11	blue	-0.28	0.012	0.28	0.012	-0.15	0.19	0.13	0.25	-0.12	0.3	0.36	0.00083	-0.043	0.7	-0.21	0.055	-0.29	0.0084	-0.38	0.00033	-0.36	0.00079
GAMT	blue	0.36	0.00087	-0.36	0.00087	0.016	0.89	-0.36	0.00081	-0.19	0.083	-0.29	0.0069	0.19	0.087	0.48	4.1e-06	0.11	0.32	0.53	2.1e-07	0.49	3e-06
ABCG2	blue	0.11	0.34	-0.11	0.34	0.06	0.59	-0.18	0.11	-0.11	0.32	-0.078	0.48	0.0098	0.93	0.093	0.4	0.014	0.9	0.19	0.086	0.14	0.2
SEC14L2	blue	-0.14	0.2	0.14	0.2	0.0066	0.95	0.14	0.21	0.14	0.2	0.13	0.26	-0.17	0.13	-0.13	0.22	-0.014	0.9	-0.21	0.056	-0.11	0.34
SMIM8	blue	0.039	0.72	-0.039	0.72	0.094	0.4	-0.089	0.42	-0.061	0.58	-0.23	0.038	-0.04	0.72	0.18	0.1	0.034	0.76	0.24	0.028	0.15	0.16
HAAO	blue	0.44	2.6e-05	-0.44	2.6e-05	0.2	0.069	-0.18	0.1	0.079	0.48	-0.28	0.0096	0.15	0.18	0.31	0.0047	0.31	0.0045	0.62	4.4e-10	0.59	4.6e-09
TMPRSS4	blue	-0.17	0.13	0.17	0.13	-0.19	0.09	-0.075	0.5	-0.11	0.31	0.36	0.00075	0.32	0.0032	0.2	0.075	-0.11	0.34	-0.34	0.0015	-0.16	0.14
RUNX1T1	blue	0.29	0.008	-0.29	0.008	0.6	2.5e-09	-0.11	0.34	0.28	0.0096	-0.17	0.13	-0.0018	0.99	0.28	0.011	0.48	5.5e-06	0.53	2.2e-07	0.53	2.4e-07
SRFBP1	blue	0.095	0.39	-0.095	0.39	0.18	0.095	0.024	0.83	0.056	0.62	-0.16	0.15	-0.051	0.64	-0.1	0.35	-0.089	0.42	0.41	0.00013	0.09	0.42
SLC25A11	blue	0.16	0.14	-0.16	0.14	-0.031	0.78	0.042	0.7	0.012	0.91	-0.016	0.89	0.03	0.79	-0.027	0.81	0.035	0.75	0.29	0.0074	0.13	0.26
NEU3	blue	0.074	0.51	-0.074	0.51	0.021	0.85	-0.13	0.25	-0.16	0.14	-0.22	0.05	-0.18	0.11	0.027	0.81	-0.015	0.89	0.34	0.0019	0.14	0.21
COG7	blue	-0.12	0.26	0.12	0.26	-0.02	0.86	-0.14	0.21	-0.13	0.23	0.11	0.33	0.095	0.39	0.18	0.11	0.058	0.6	-0.15	0.18	-0.025	0.82
FHL3	blue	-0.0044	0.97	0.0044	0.97	0.14	0.2	-0.0036	0.97	-0.036	0.75	-0.14	0.19	-0.29	0.0076	-0.046	0.68	-0.13	0.26	0.33	0.0026	0.034	0.76
BCL2L10	blue	-0.15	0.18	0.15	0.18	-0.0037	0.97	-0.11	0.33	-0.18	0.11	0.16	0.16	0.08	0.47	0.041	0.71	-0.039	0.73	-0.16	0.14	-0.17	0.13
PITX2	blue	0.063	0.57	-0.063	0.57	-0.16	0.15	-0.1	0.35	-0.17	0.11	0.083	0.46	0.22	0.045	0.043	0.7	-0.071	0.52	0.16	0.15	-0.07	0.53
GALT	blue	0.18	0.096	-0.18	0.096	0.044	0.69	0.27	0.014	0.24	0.028	-0.25	0.021	-0.063	0.57	-0.15	0.16	0.1	0.37	0.41	9.6e-05	0.34	0.0018
SYK	blue	-0.2	0.072	0.2	0.072	-0.19	0.085	0.039	0.73	0.0066	0.95	0.29	0.0083	0.2	0.065	0.075	0.5	-0.12	0.26	-0.36	0.00092	-0.13	0.25
TRIM14	blue	-0.23	0.04	0.23	0.04	-0.048	0.67	0.43	5.7e-05	0.23	0.035	0.11	0.32	-0.035	0.75	-0.26	0.016	-0.22	0.05	-0.3	0.0057	-0.25	0.023
TMEM70	blue	0.087	0.43	-0.087	0.43	-0.017	0.88	-0.054	0.63	0.021	0.85	-0.068	0.54	-0.16	0.15	0.012	0.92	-0.028	0.8	0.19	0.081	0.15	0.18
USP27X	blue	0.22	0.046	-0.22	0.046	0.15	0.17	-0.3	0.0062	-0.16	0.15	-0.17	0.12	0.057	0.61	0.3	0.0067	0.046	0.68	0.32	0.0037	0.26	0.019
LRRC47	blue	0.2	0.071	-0.2	0.071	-0.11	0.34	-0.15	0.19	-0.087	0.43	0.059	0.6	0.18	0.1	0.051	0.65	0.091	0.41	0.091	0.41	0.068	0.54
GMPR	blue	0.19	0.093	-0.19	0.093	0.16	0.15	0.19	0.083	0.27	0.012	-0.36	0.00096	-0.15	0.19	0.081	0.47	0.2	0.065	0.48	3.9e-06	0.29	0.009
TGOLN2	blue	0.12	0.26	-0.12	0.26	0.33	0.0027	-0.038	0.74	0.076	0.5	-0.15	0.17	-0.12	0.3	-0.036	0.75	0.24	0.032	0.3	0.0067	0.27	0.014
THNSL1	blue	0.17	0.12	-0.17	0.12	0.075	0.5	-0.4	0.00016	-0.24	0.031	-0.33	0.0025	0.028	0.8	0.5	1.2e-06	0.053	0.63	0.51	1.1e-06	0.32	0.0032
ZNF680	blue	0.32	0.0037	-0.32	0.0037	0.17	0.13	-0.15	0.18	0.056	0.61	-0.27	0.015	0.17	0.13	0.28	0.01	0.19	0.083	0.49	3e-06	0.42	7.7e-05
VPS4A	blue	0.027	0.81	-0.027	0.81	-0.11	0.32	-0.14	0.19	-0.2	0.074	0.035	0.75	0.057	0.61	0.12	0.27	0.013	0.91	0.14	0.2	0.027	0.81
CAMK2B	blue	0.38	0.00036	-0.38	0.00036	0.17	0.12	-0.2	0.067	-0.015	0.89	-0.29	0.0074	0.051	0.65	0.21	0.056	0.13	0.24	0.83	4.4e-22	0.42	7e-05
SYNM	blue	0.3	0.0052	-0.3	0.0052	0.13	0.25	-0.19	0.093	-0.051	0.64	-0.2	0.073	0.091	0.41	0.25	0.02	0.12	0.28	0.6	2e-09	0.41	0.00011
SLC7A2	blue	0.45	2.2e-05	-0.45	2.2e-05	0.26	0.017	-0.25	0.023	0.0077	0.94	-0.067	0.55	0.18	0.11	0.19	0.085	0.28	0.011	0.57	2.5e-08	0.49	2.7e-06
ZCCHC14	blue	0.011	0.92	-0.011	0.92	0.16	0.14	-0.014	0.9	0.037	0.74	-0.099	0.37	-0.071	0.52	0.14	0.21	-0.074	0.51	0.14	0.22	0.078	0.48
HAUS1	blue	-0.13	0.23	0.13	0.23	-0.17	0.13	0.3	0.0059	0.17	0.12	0.1	0.37	-0.035	0.75	-0.13	0.23	-0.074	0.5	-0.22	0.042	-0.087	0.43
CREB5	blue	0.12	0.28	-0.12	0.28	0.25	0.023	-0.1	0.36	-0.013	0.91	-0.26	0.017	-0.18	0.11	0.15	0.17	0.23	0.037	0.34	0.0018	0.24	0.029
ADARB1	blue	-0.012	0.91	0.012	0.91	0.2	0.069	0.14	0.22	0.14	0.2	-0.14	0.21	-0.25	0.021	-0.024	0.83	-0.044	0.69	0.19	0.084	0.084	0.45
RBM39	blue	0.18	0.099	-0.18	0.099	0.14	0.21	-0.095	0.39	0.06	0.59	0.009	0.94	0.077	0.49	0.13	0.26	-0.018	0.87	0.26	0.019	0.19	0.079
AQP7	blue	0.56	3.7e-08	-0.56	3.7e-08	0.12	0.26	-0.2	0.065	0.0039	0.97	-0.23	0.039	0.13	0.24	0.19	0.089	0.35	0.0012	0.81	1.5e-20	0.64	8.4e-11
JSRP1	blue	0.19	0.078	-0.19	0.078	0.36	0.0007	-0.13	0.23	0.17	0.13	-0.3	0.0059	-0.093	0.4	0.25	0.023	-0.02	0.85	0.73	3.9e-15	0.37	0.0005
BTG1	blue	0.08	0.47	-0.08	0.47	0.25	0.021	0.09	0.42	0.15	0.16	0.095	0.39	0.025	0.82	-0.029	0.79	0.018	0.87	0.18	0.11	0.14	0.21
HIP1R	blue	-0.021	0.85	0.021	0.85	-0.11	0.34	-0.091	0.41	-0.14	0.19	0.17	0.12	0.012	0.91	0.072	0.52	-0.069	0.53	-0.19	0.085	-0.058	0.6
SMYD4	blue	-0.062	0.58	0.062	0.58	0.17	0.11	0.18	0.11	0.041	0.71	-0.28	0.01	-0.23	0.033	0.0064	0.95	-0.062	0.58	0.27	0.013	0.12	0.3
GIMAP7	blue	0.3	0.0063	-0.3	0.0063	0.28	0.011	0.14	0.19	0.36	0.00092	-0.11	0.3	0.013	0.9	0.076	0.5	0.36	0.00084	0.53	2.9e-07	0.45	2.1e-05
NSUN6	blue	0.076	0.49	-0.076	0.49	0.12	0.27	-0.3	0.0054	-0.22	0.048	-0.23	0.034	-0.033	0.76	0.37	0.00059	0.054	0.63	0.32	0.0035	0.28	0.0094
MYADML2	blue	0.4	0.00017	-0.4	0.00017	0.14	0.2	-0.17	0.13	0.0086	0.94	-0.24	0.031	0.054	0.63	0.16	0.15	0.074	0.5	0.84	1.3e-23	0.42	7.2e-05
RRP1	blue	0.091	0.41	-0.091	0.41	-0.21	0.052	-0.09	0.42	-0.11	0.32	0.052	0.64	0.12	0.3	0.055	0.62	0.1	0.36	-0.22	0.05	0.099	0.37
POLR3E	blue	-0.042	0.7	0.042	0.7	-0.12	0.3	-0.27	0.013	-0.28	0.009	-0.049	0.66	0.1	0.36	0.24	0.027	-0.2	0.076	0.15	0.19	0.026	0.81
CLIC1	blue	-0.076	0.49	0.076	0.49	-0.0044	0.97	0.086	0.44	0.043	0.7	0.093	0.4	-0.0086	0.94	-0.094	0.4	-0.16	0.14	-0.2	0.067	-0.12	0.3
ALG3	blue	-0.065	0.56	0.065	0.56	-0.18	0.1	-0.25	0.022	-0.25	0.024	-0.021	0.85	0.033	0.77	0.2	0.066	-0.048	0.66	-0.21	0.052	-0.16	0.16
DCAF11	blue	0.18	0.1	-0.18	0.1	0.042	0.71	-0.053	0.63	-0.024	0.83	0.025	0.82	0.17	0.12	0.09	0.42	0.047	0.68	0.38	0.00036	0.29	0.0081
SLC9A9	blue	0.14	0.2	-0.14	0.2	-0.096	0.39	-0.28	0.0093	-0.23	0.04	0.14	0.22	0.37	0.00058	0.31	0.0049	0.0011	0.99	0.22	0.041	0.14	0.19
SLC1A3	blue	0.29	0.007	-0.29	0.007	0.18	0.098	0.13	0.26	0.21	0.054	0.14	0.21	0.062	0.58	-0.25	0.021	0.23	0.034	0.22	0.049	0.16	0.14
INAVA	blue	-0.2	0.069	0.2	0.069	-0.14	0.2	0.0036	0.97	-0.13	0.25	0.29	0.0081	0.11	0.32	-0.042	0.71	-0.052	0.64	-0.33	0.0023	-0.23	0.037
CSNK1D	blue	0.095	0.4	-0.095	0.4	0.021	0.85	-0.25	0.022	-0.25	0.022	-0.023	0.84	-0.0079	0.94	0.12	0.29	0.081	0.46	0.11	0.33	0.019	0.87
HRC	blue	0.31	0.0048	-0.31	0.0048	0.28	0.0091	-0.13	0.24	0.064	0.56	-0.26	0.016	-0.025	0.82	0.11	0.34	0.1	0.35	0.82	3.8e-21	0.36	0.00088
ZBTB10	blue	0.18	0.1	-0.18	0.1	0.42	6.9e-05	-0.28	0.01	0.013	0.91	-0.5	1.2e-06	-0.075	0.5	0.55	7.6e-08	0.2	0.077	0.56	4.4e-08	0.44	3.2e-05
INPP5K	blue	0.19	0.081	-0.19	0.081	0.1	0.35	-0.00014	1	0.097	0.39	-0.072	0.52	-0.057	0.61	0.035	0.76	0.11	0.32	0.38	0.00047	0.24	0.03
ANKS1A	blue	-0.074	0.51	0.074	0.51	-0.22	0.047	0.06	0.59	-0.095	0.39	0.17	0.13	0.044	0.7	0.032	0.77	0.015	0.89	-0.34	0.0018	-0.025	0.82
COPS5	blue	-0.21	0.056	0.21	0.056	-0.049	0.66	0.054	0.63	-0.014	0.9	-0.056	0.61	-0.16	0.15	0.058	0.6	-0.079	0.48	-0.22	0.046	-0.19	0.086
THBS3	blue	0.038	0.74	-0.038	0.74	0.27	0.013	-0.19	0.079	0.01	0.93	-0.18	0.098	-0.022	0.84	0.34	0.0016	0.008	0.94	0.24	0.026	0.24	0.032
UNKL	blue	-0.15	0.17	0.15	0.17	0.001	0.99	-0.16	0.15	-0.14	0.22	-0.17	0.12	-0.13	0.23	0.29	0.0069	-0.018	0.87	0.11	0.3	-0.026	0.82
L1CAM	blue	0.016	0.89	-0.016	0.89	0.18	0.1	-0.16	0.16	-0.099	0.37	-0.13	0.25	-0.29	0.008	0.02	0.85	0.15	0.19	0.25	0.023	0.096	0.39
EPS15L1	blue	0.072	0.51	-0.072	0.51	0.15	0.17	-0.13	0.24	0.0037	0.97	-0.019	0.86	-0.035	0.75	0.11	0.34	0.013	0.91	0.22	0.051	0.12	0.28
CUL2	blue	-0.029	0.79	0.029	0.79	0.062	0.58	-0.063	0.57	-0.079	0.48	-0.029	0.79	-0.017	0.88	0.14	0.21	-0.03	0.79	0.16	0.14	0.11	0.32
ARHGEF16	blue	-0.0053	0.96	0.0053	0.96	-0.28	0.012	-0.092	0.41	-0.21	0.061	0.027	0.81	0.14	0.21	0.083	0.46	-0.026	0.82	-0.25	0.021	-0.00012	1
GPAT4	blue	-0.079	0.48	0.079	0.48	0.13	0.25	0.032	0.78	0.015	0.9	-0.12	0.29	-0.14	0.2	0.013	0.91	-0.025	0.83	0.15	0.18	0.05	0.65
AP2S1	blue	-0.23	0.041	0.23	0.041	-0.17	0.11	-0.025	0.82	-0.17	0.13	0.19	0.089	-0.0024	0.98	-0.047	0.67	-0.1	0.36	-0.3	0.0054	-0.24	0.026
INTU	blue	0.056	0.62	-0.056	0.62	-0.27	0.015	-0.18	0.11	-0.24	0.026	0.11	0.34	0.24	0.029	0.15	0.18	0.023	0.83	-0.16	0.14	0.041	0.71
RAB24	blue	0.11	0.31	-0.11	0.31	-0.2	0.066	0.016	0.89	-0.012	0.92	0.27	0.014	0.2	0.065	-0.037	0.74	-0.014	0.9	-0.18	0.11	0.1	0.36
SMPX	blue	0.41	0.00014	-0.41	0.00014	0.19	0.085	-0.22	0.049	0.0054	0.96	-0.21	0.051	0.048	0.67	0.12	0.27	0.087	0.44	0.84	1.2e-23	0.37	0.00049
ESYT2	blue	0.086	0.44	-0.086	0.44	0.087	0.43	-0.24	0.029	-0.17	0.13	0.055	0.62	0.055	0.62	0.11	0.3	0.12	0.3	0.17	0.13	0.078	0.48
RIPK2	blue	-0.25	0.021	0.25	0.021	0.091	0.42	0.11	0.32	0.1	0.37	-0.14	0.21	-0.27	0.012	0.07	0.53	-0.059	0.6	-0.14	0.19	-0.09	0.42
ARHGAP35	blue	-0.076	0.49	0.076	0.49	0.08	0.47	-0.07	0.53	-0.16	0.15	0.015	0.89	-0.03	0.79	0.039	0.72	-0.17	0.12	0.12	0.28	0.041	0.71
FAAP100	blue	-0.04	0.72	0.04	0.72	-0.068	0.54	-0.012	0.92	-0.097	0.39	0.072	0.52	0.0077	0.95	0.083	0.45	0.0032	0.98	-0.14	0.19	0.021	0.85
SIL1	blue	-0.15	0.16	0.15	0.16	0.12	0.26	0.22	0.043	0.16	0.15	-0.14	0.21	-0.24	0.028	-0.062	0.58	-0.018	0.87	-0.13	0.23	0.051	0.64
SYTL1	blue	0.072	0.52	-0.072	0.52	-0.28	0.011	-0.16	0.15	-0.26	0.019	0.29	0.008	0.35	0.0014	0.094	0.4	0.25	0.024	-0.26	0.017	0.082	0.46
BOK	blue	-0.1	0.35	0.1	0.35	-0.13	0.25	0.051	0.65	-0.13	0.25	0.24	0.03	0.0057	0.96	-0.12	0.29	-0.1	0.36	-0.28	0.012	-0.14	0.21
FAM234A	blue	-0.025	0.83	0.025	0.83	-0.12	0.3	-0.13	0.26	-0.15	0.16	0.12	0.27	-0.032	0.77	0.035	0.75	0.085	0.45	-0.2	0.065	-0.015	0.89
SAMD4A	blue	-0.02	0.86	0.02	0.86	0.35	0.0013	-0.032	0.78	0.071	0.52	-0.37	0.00057	-0.39	0.00032	0.022	0.85	0.007	0.95	0.38	0.00043	0.23	0.038
ARHGAP5	blue	0.088	0.43	-0.088	0.43	0.17	0.12	0.019	0.87	-0.0098	0.93	-0.17	0.13	-0.13	0.24	-0.16	0.14	0.0094	0.93	0.28	0.011	0.15	0.18
MYOZ3	blue	0.36	0.00088	-0.36	0.00088	0.23	0.036	-0.19	0.09	0.021	0.85	-0.25	0.02	0.0017	0.99	0.19	0.094	0.045	0.69	0.9	1.1e-31	0.41	0.00011
ATP6AP2	blue	-0.12	0.29	0.12	0.29	0.065	0.56	-0.02	0.86	-0.014	0.9	0.22	0.043	0.043	0.7	-0.043	0.7	0.032	0.77	-0.22	0.048	-0.12	0.26
NEB	blue	0.23	0.036	-0.23	0.036	0.23	0.035	-0.24	0.032	-0.028	0.8	-0.079	0.48	0.083	0.46	0.21	0.061	0.053	0.63	0.68	9.4e-13	0.19	0.08
ORAI1	blue	-0.024	0.83	0.024	0.83	-0.065	0.56	-0.19	0.087	-0.19	0.079	-0.019	0.86	-0.081	0.47	0.05	0.65	0.021	0.85	0.085	0.45	0.032	0.77
IMPA1	blue	-0.047	0.67	0.047	0.67	0.19	0.079	0.1	0.37	0.13	0.26	-0.079	0.48	-0.18	0.1	-0.029	0.79	0.058	0.6	0.18	0.11	0.027	0.81
INMT	blue	0.38	0.00038	-0.38	0.00038	0.28	0.0091	-0.094	0.4	0.25	0.022	-0.21	0.053	0.11	0.32	0.28	0.011	0.2	0.068	0.48	4.8e-06	0.63	2.4e-10
ZNF524	blue	0.17	0.12	-0.17	0.12	-0.14	0.22	-0.2	0.066	-0.21	0.063	0.14	0.22	0.22	0.043	0.19	0.083	0.0045	0.97	0.17	0.12	0.16	0.15
TMEM160	blue	-0.074	0.51	0.074	0.51	-0.00052	1	-0.057	0.61	-0.057	0.61	0.079	0.48	0.0094	0.93	0.073	0.51	-0.083	0.46	-0.1	0.35	-0.072	0.52
LONP2	blue	0.056	0.62	-0.056	0.62	0.22	0.047	-0.075	0.5	0.046	0.68	-0.046	0.68	-0.0035	0.98	0.069	0.53	0.03	0.79	0.21	0.053	0.14	0.2
HEATR3	blue	-0.063	0.57	0.063	0.57	-0.22	0.05	0.093	0.4	-0.056	0.62	0.049	0.66	-0.0088	0.94	-0.12	0.27	-0.23	0.039	-0.14	0.19	-0.036	0.75
ATP2A1	blue	0.48	3.7e-06	-0.48	3.7e-06	0.095	0.39	-0.22	0.049	-0.022	0.84	-0.16	0.14	0.12	0.29	0.14	0.22	0.11	0.3	0.83	1.5e-22	0.36	0.00076
STK40	blue	0.33	0.0027	-0.33	0.0027	-0.086	0.44	-0.19	0.091	-0.072	0.52	0.36	0.00075	0.41	9.7e-05	0.051	0.65	0.1	0.36	0.27	0.014	0.28	0.011
CD164	blue	0.088	0.43	-0.088	0.43	0.14	0.19	0.018	0.87	0.06	0.59	-0.19	0.085	-0.02	0.86	0.086	0.44	0.11	0.32	0.26	0.019	0.25	0.025
DUOXA1	blue	-0.14	0.21	0.14	0.21	-0.29	0.0087	0.17	0.12	-0.049	0.66	0.63	1.7e-10	0.15	0.16	-0.37	0.00051	-0.046	0.68	-0.49	2.9e-06	-0.36	0.00075
CASP2	blue	-0.13	0.25	0.13	0.25	-0.065	0.56	0.2	0.066	0.12	0.29	-0.067	0.55	-0.073	0.51	-0.097	0.38	-0.091	0.42	-0.23	0.037	-0.094	0.4
ERVK3-1	blue	0.2	0.076	-0.2	0.076	-0.16	0.14	-0.059	0.59	-0.12	0.27	-0.11	0.32	0.08	0.47	-0.01	0.93	-0.016	0.88	0.12	0.28	0.04	0.72
GORASP1	blue	0.062	0.58	-0.062	0.58	-0.0025	0.98	0.012	0.92	0.061	0.58	0.099	0.37	0.09	0.42	-0.12	0.27	-0.012	0.91	0.12	0.27	0.084	0.45
SLC35C2	blue	-0.077	0.49	0.077	0.49	0.049	0.66	-0.14	0.22	-0.27	0.013	-0.07	0.53	-0.12	0.26	0.027	0.81	0.0099	0.93	0.11	0.31	-0.04	0.72
EGF	blue	0.33	0.0026	-0.33	0.0026	0.13	0.23	-0.18	0.095	-0.045	0.68	-0.16	0.16	0.14	0.2	0.27	0.013	0.075	0.5	0.66	1.2e-11	0.49	2e-06
RPLP1	blue	0.17	0.13	-0.17	0.13	0.063	0.57	-0.17	0.12	-0.065	0.56	-0.016	0.88	0.05	0.65	0.14	0.2	0.12	0.3	0.25	0.021	0.21	0.062
GGH	blue	-0.24	0.028	0.24	0.028	-0.096	0.39	0.008	0.94	-0.15	0.17	0.12	0.26	0.035	0.76	-0.034	0.76	-0.13	0.25	-0.24	0.027	-0.17	0.12
RYR1	blue	0.15	0.17	-0.15	0.17	0.12	0.28	-0.33	0.002	-0.22	0.043	-0.24	0.031	-0.02	0.86	0.26	0.019	0.017	0.88	0.66	1.4e-11	0.18	0.1
MYH7	blue	0.39	0.00029	-0.39	0.00029	0.16	0.14	-0.23	0.037	-0.043	0.7	-0.21	0.057	0.1	0.37	0.17	0.13	0.11	0.33	0.77	8.9e-18	0.3	0.0064
METTL3	blue	0.11	0.3	-0.11	0.3	-0.14	0.19	-0.045	0.69	-0.14	0.21	0.0087	0.94	-0.053	0.64	0.03	0.78	0.063	0.57	0.14	0.21	0.055	0.62
ABCC3	blue	-0.12	0.28	0.12	0.28	-0.093	0.4	-0.14	0.22	-0.084	0.45	0.033	0.77	0.077	0.49	0.11	0.31	-0.015	0.89	-0.2	0.064	-0.079	0.48
SEPTIN11	blue	0.066	0.55	-0.066	0.55	0.26	0.02	-0.14	0.2	-0.072	0.52	-0.33	0.0021	-0.23	0.036	0.16	0.15	0.094	0.4	0.34	0.0017	0.075	0.5
H4C8	blue	-0.064	0.56	0.064	0.56	-0.006	0.96	-0.21	0.058	-0.23	0.034	-0.11	0.32	0.086	0.44	0.23	0.04	-0.049	0.66	0.19	0.08	-0.049	0.66
EYA4	blue	0.13	0.24	-0.13	0.24	0.44	3.3e-05	-0.041	0.71	0.076	0.49	-0.31	0.0045	-0.16	0.15	0.18	0.1	0.047	0.68	0.6	1.6e-09	0.35	0.0011
CCN3	blue	0.11	0.34	-0.11	0.34	0.16	0.15	-0.3	0.0056	-0.069	0.53	-0.14	0.2	0.018	0.87	0.3	0.0059	0.15	0.19	0.33	0.0021	0.21	0.052
CUL1	blue	0.12	0.27	-0.12	0.27	-0.041	0.71	-0.015	0.89	-0.14	0.19	0.11	0.34	0.024	0.83	-0.12	0.28	-0.013	0.91	0.13	0.25	0.0047	0.97
CBLC	blue	-0.15	0.17	0.15	0.17	-0.34	0.0017	-0.083	0.46	-0.24	0.03	0.46	1.1e-05	0.15	0.17	0.017	0.88	-0.15	0.18	-0.41	0.00014	-0.31	0.0038
PRKCZ	blue	-0.12	0.3	0.12	0.3	-0.15	0.17	-0.15	0.19	-0.28	0.011	0.15	0.17	0.047	0.67	0.1	0.36	0.023	0.84	-0.22	0.048	-0.06	0.59
PRKX	blue	0.032	0.77	-0.032	0.77	-0.13	0.23	-0.096	0.39	-0.084	0.45	0.25	0.021	0.41	0.00013	0.28	0.01	-0.086	0.44	-0.23	0.034	-0.001	0.99
BIN1	blue	0.14	0.22	-0.14	0.22	0.21	0.063	-0.0082	0.94	0.073	0.51	-0.16	0.15	-0.21	0.053	-0.053	0.63	-0.05	0.65	0.59	6.1e-09	0.14	0.2
MCM4	blue	-0.28	0.011	0.28	0.011	-0.27	0.014	0.21	0.057	-0.091	0.41	0.05	0.65	-0.14	0.22	-0.2	0.068	-0.24	0.03	-0.44	3.8e-05	-0.36	0.00076
RAD18	blue	-0.16	0.14	0.16	0.14	-0.13	0.23	0.16	0.16	0.035	0.75	0.04	0.72	-0.14	0.22	-0.22	0.042	-0.17	0.13	-0.25	0.022	-0.21	0.06
ABL2	blue	-0.32	0.0029	0.32	0.0029	0.4	0.00019	0.061	0.58	0.099	0.37	-0.2	0.073	-0.41	9.6e-05	-0.079	0.48	-0.24	0.031	0.23	0.033	-0.19	0.083
PRPF18	blue	-0.074	0.51	0.074	0.51	-0.074	0.5	-0.024	0.83	-0.049	0.66	0.12	0.28	0.14	0.2	0.076	0.49	-0.041	0.71	0.039	0.72	0.028	0.8
RPP25L	blue	0.13	0.26	-0.13	0.26	0.014	0.9	0.071	0.52	0.18	0.1	-0.21	0.057	-0.15	0.18	0.069	0.53	0.024	0.83	0.23	0.037	0.17	0.13
BABAM2	blue	0.0082	0.94	-0.0082	0.94	-0.057	0.61	-0.055	0.62	-0.091	0.41	-0.028	0.8	-0.0024	0.98	0.11	0.32	-0.088	0.43	0.11	0.34	0.059	0.6
TAF15	blue	-0.077	0.49	0.077	0.49	0.17	0.12	-0.041	0.71	-0.015	0.89	-0.1	0.36	-0.095	0.39	0.16	0.16	0.057	0.61	0.26	0.016	0.024	0.83
GNAI3	blue	0.064	0.57	-0.064	0.57	-0.21	0.055	0.045	0.68	-0.035	0.76	0.15	0.18	0.086	0.44	-0.12	0.26	0.044	0.69	-0.21	0.06	-0.12	0.28
DIRAS1	blue	0.28	0.0093	-0.28	0.0093	0.4	0.00016	-0.15	0.17	0.036	0.75	-0.19	0.094	-0.0042	0.97	0.24	0.032	0.21	0.06	0.61	8.9e-10	0.51	9.1e-07
CACTIN	blue	-0.13	0.24	0.13	0.24	0.084	0.45	0.23	0.039	0.15	0.18	-0.013	0.91	-0.13	0.25	-0.07	0.53	0.024	0.83	-0.13	0.24	-0.054	0.63
ANK2	blue	0.32	0.0029	-0.32	0.0029	0.48	5.7e-06	-0.16	0.15	0.21	0.054	-0.3	0.0061	-0.048	0.67	0.21	0.053	0.19	0.094	0.79	3.3e-19	0.52	4.8e-07
CEP85L	blue	0.24	0.031	-0.24	0.031	0.35	0.0012	-0.023	0.84	0.2	0.074	-0.28	0.0095	-0.024	0.83	0.14	0.2	0.073	0.51	0.54	1.2e-07	0.48	3.4e-06
CSRNP2	blue	-0.0068	0.95	0.0068	0.95	0.23	0.036	-0.00054	1	0.086	0.44	0.044	0.69	0.0098	0.93	0.11	0.3	0.033	0.76	0.21	0.062	0.21	0.057
GPR37	blue	0.15	0.18	-0.15	0.18	-0.088	0.43	0.17	0.12	0.084	0.45	0.24	0.027	0.13	0.26	-0.2	0.067	0.23	0.041	-0.17	0.13	0.065	0.56
ADAM17	blue	-0.17	0.13	0.17	0.13	0.15	0.18	-0.024	0.83	0.031	0.78	-0.05	0.65	-0.00017	1	0.15	0.17	0.0084	0.94	-0.064	0.57	0.041	0.71
CYP4F11	blue	-0.19	0.089	0.19	0.089	-0.22	0.049	-0.25	0.022	-0.37	0.00068	0.079	0.48	0.17	0.12	0.17	0.12	-0.097	0.39	-0.26	0.02	-0.18	0.097
FLNB	blue	-0.13	0.24	0.13	0.24	0.043	0.7	0.18	0.11	0.0017	0.99	0.22	0.046	-0.13	0.24	-0.28	0.0098	-0.063	0.57	-0.2	0.064	-0.094	0.4
ZNF354C	blue	0.35	0.0011	-0.35	0.0011	0.14	0.21	-0.33	0.0027	-0.043	0.7	-0.33	0.0026	0.074	0.51	0.36	0.00092	0.25	0.022	0.46	1.3e-05	0.4	0.00018
TMSB10	blue	-0.3	0.0056	0.3	0.0056	-0.038	0.73	0.17	0.13	0.023	0.84	-0.078	0.49	-0.23	0.036	-0.11	0.31	-0.081	0.47	-0.25	0.025	-0.21	0.059
HBP1	blue	0.26	0.019	-0.26	0.019	0.038	0.74	-0.15	0.17	-0.1	0.37	0.066	0.55	0.29	0.0072	0.22	0.051	0.029	0.8	0.36	0.0008	0.28	0.0092
SLN	blue	0.29	0.0069	-0.29	0.0069	0.21	0.059	-0.23	0.039	-0.049	0.66	-0.22	0.048	0.047	0.67	0.17	0.13	0.0074	0.95	0.78	2.6e-18	0.24	0.028
SYNJ2BP	blue	0.17	0.13	-0.17	0.13	0.13	0.25	-0.13	0.26	-0.03	0.79	-0.27	0.015	-0.013	0.91	0.2	0.065	0.16	0.14	0.28	0.01	0.29	0.0083
RAB27B	blue	0.09	0.42	-0.09	0.42	-0.1	0.36	0.0055	0.96	-0.11	0.31	0.31	0.0047	0.21	0.053	-0.24	0.031	0.19	0.091	-0.18	0.11	0.12	0.3
PDLIM5	blue	0.24	0.027	-0.24	0.027	-0.06	0.59	-0.1	0.36	-0.0074	0.95	0.21	0.052	0.2	0.07	-0.0042	0.97	-0.055	0.62	0.23	0.037	0.15	0.16
KLHL3	blue	0.15	0.17	-0.15	0.17	0.16	0.14	-0.17	0.12	-0.034	0.76	-0.1	0.35	0.15	0.17	0.25	0.022	0.2	0.067	0.37	0.00054	0.27	0.013
LIN7B	blue	0.095	0.39	-0.095	0.39	-0.2	0.064	-0.31	0.0047	-0.28	0.011	0.14	0.2	0.26	0.016	0.29	0.009	0.0086	0.94	0.19	0.086	0.093	0.4
TFPT	blue	-0.0086	0.94	0.0086	0.94	0.11	0.31	-0.037	0.74	0.011	0.92	-0.15	0.17	-0.2	0.065	0.083	0.46	-0.059	0.6	0.19	0.082	0.014	0.9
FBXL12	blue	-0.12	0.27	0.12	0.27	-0.056	0.62	0.1	0.36	-0.039	0.73	0.065	0.56	-0.12	0.3	-0.038	0.73	0.088	0.43	-0.19	0.084	-0.095	0.39
PDCD2L	blue	-0.014	0.9	0.014	0.9	-0.16	0.14	-0.12	0.26	-0.25	0.024	-0.0052	0.96	-0.035	0.76	0.086	0.44	-0.13	0.24	0.13	0.25	-0.091	0.41
PDGFB	blue	-0.093	0.4	0.093	0.4	0.37	0.00052	-0.12	0.26	0.038	0.73	-0.29	0.0071	-0.2	0.075	0.37	0.00053	-0.043	0.7	0.33	0.002	0.24	0.032
LSM12	blue	-0.19	0.093	0.19	0.093	-0.15	0.17	0.17	0.13	-0.032	0.78	0.17	0.13	-0.015	0.89	-0.088	0.43	-0.034	0.76	-0.22	0.042	-0.17	0.13
PPFIA1	blue	-0.031	0.78	0.031	0.78	0.11	0.31	-0.22	0.042	-0.22	0.049	-0.2	0.064	-0.16	0.14	0.18	0.11	-0.021	0.85	0.16	0.16	-0.023	0.84
HACD2	blue	-0.18	0.1	0.18	0.1	0.094	0.4	0.16	0.14	0.047	0.67	0.099	0.37	-0.083	0.45	-0.22	0.043	0.024	0.83	-0.1	0.37	-0.017	0.88
INPP4A	blue	-0.089	0.42	0.089	0.42	0.17	0.13	0.057	0.61	0.12	0.28	-0.071	0.52	-0.17	0.13	0.085	0.45	-0.032	0.77	0.13	0.23	0.031	0.78
ZNF35	blue	0.17	0.13	-0.17	0.13	-0.22	0.048	0.031	0.78	-0.11	0.32	0.13	0.24	0.13	0.25	-0.17	0.14	-0.043	0.7	-0.16	0.14	0.06	0.59
HMGN3	blue	0.17	0.12	-0.17	0.12	-0.14	0.19	0.12	0.27	0.037	0.74	0.053	0.64	0.11	0.31	-0.042	0.71	-0.13	0.26	0.15	0.19	0.15	0.18
CHP1	blue	0.26	0.018	-0.26	0.018	0.12	0.29	-0.1	0.36	-0.005	0.96	0.19	0.082	0.28	0.0094	0.012	0.92	0.052	0.64	0.4	0.00022	0.19	0.083
DUS2	blue	-0.018	0.87	0.018	0.87	0.11	0.33	-0.12	0.28	-0.051	0.64	0.066	0.56	-0.15	0.19	0.059	0.6	-0.09	0.42	0.15	0.17	-0.098	0.38
SOGA1	blue	-0.28	0.01	0.28	0.01	0.2	0.065	-0.021	0.85	0.053	0.63	-0.057	0.61	-0.11	0.3	0.11	0.31	-0.21	0.06	-0.14	0.22	-0.12	0.28
SLC25A51	blue	0.094	0.4	-0.094	0.4	0.048	0.66	0.033	0.77	0.096	0.39	-0.046	0.68	0.028	0.8	0.078	0.48	-0.027	0.81	0.32	0.0028	0.022	0.84
SYNE1	blue	0.2	0.067	-0.2	0.067	0.61	1.3e-09	0.2	0.077	0.48	4.6e-06	-0.16	0.15	-0.13	0.25	-0.046	0.68	0.079	0.48	0.64	1.1e-10	0.43	4.2e-05
WRAP53	blue	-0.14	0.2	0.14	0.2	0.12	0.28	0.12	0.28	0.081	0.47	-0.22	0.045	-0.31	0.0045	-0.12	0.27	-0.2	0.075	0.24	0.026	-0.022	0.85
HJV	blue	0.43	4.3e-05	-0.43	4.3e-05	0.13	0.24	-0.15	0.17	0.01	0.93	-0.21	0.06	0.048	0.67	0.095	0.39	0.056	0.61	0.86	1.4e-25	0.38	0.00043
RNF146	blue	0.024	0.83	-0.024	0.83	0.36	0.00073	-0.032	0.77	0.14	0.2	-0.12	0.29	-0.059	0.59	0.19	0.089	0.088	0.43	0.27	0.013	0.23	0.033
LMBR1L	blue	0.12	0.3	-0.12	0.3	-0.088	0.43	0.0056	0.96	-0.1	0.35	0.25	0.023	0.19	0.081	-0.055	0.62	-0.11	0.33	0.18	0.098	0.083	0.46
ADAMTSL1	blue	0.11	0.34	-0.11	0.34	0.63	2.6e-10	0.087	0.43	0.4	0.00018	-0.22	0.05	-0.19	0.09	0.14	0.22	0.13	0.23	0.43	4.1e-05	0.45	2e-05
BAD	blue	0.057	0.61	-0.057	0.61	-0.085	0.44	-0.037	0.74	-0.08	0.47	-0.042	0.71	-0.062	0.58	0.033	0.76	-0.14	0.22	0.12	0.28	0.038	0.73
G3BP2	blue	0.063	0.57	-0.063	0.57	-0.12	0.27	-0.15	0.19	-0.17	0.12	0.028	0.8	0.086	0.44	0.1	0.37	0.015	0.89	0.017	0.88	-0.051	0.65
ZNF565	blue	0.16	0.15	-0.16	0.15	-0.017	0.88	-0.23	0.036	-0.22	0.048	0.12	0.27	0.26	0.018	0.22	0.042	-0.0091	0.93	0.2	0.07	0.16	0.15
MRRF	blue	-0.026	0.82	0.026	0.82	0.023	0.84	0.12	0.28	0.11	0.32	-0.039	0.73	-0.035	0.75	-0.055	0.62	-0.066	0.55	0.24	0.026	0.037	0.74
NQO1	blue	0.015	0.9	-0.015	0.9	-0.21	0.061	-0.21	0.058	-0.22	0.048	0.023	0.84	0.24	0.031	0.24	0.029	-0.14	0.19	0.081	0.47	-0.015	0.89
MADD	blue	0.21	0.06	-0.21	0.06	0.053	0.64	0.13	0.24	0.085	0.45	0.08	0.47	0.081	0.47	-0.034	0.76	0.19	0.091	0.28	0.0097	0.3	0.0056
ENTR1	blue	-0.0058	0.96	0.0058	0.96	-0.23	0.041	0.016	0.89	-0.1	0.36	-0.053	0.64	-0.099	0.37	0.031	0.78	-0.014	0.9	-0.18	0.096	-0.15	0.17
FAM122B	blue	-0.069	0.53	0.069	0.53	-0.043	0.7	0.18	0.094	0.065	0.56	0.081	0.47	0.073	0.51	-0.14	0.2	-0.062	0.58	-0.19	0.093	-0.12	0.28
MYF6	blue	0.28	0.0092	-0.28	0.0092	0.27	0.013	-0.12	0.26	0.023	0.84	-0.27	0.014	-0.088	0.43	0.044	0.69	-0.011	0.92	0.86	2.4e-25	0.26	0.018
ADSS1	blue	0.11	0.32	-0.11	0.32	0.14	0.22	-0.27	0.015	-0.24	0.032	-0.056	0.61	0.14	0.2	0.28	0.011	0.019	0.86	0.42	7.3e-05	0.26	0.017
SLC12A8	blue	-0.16	0.16	0.16	0.16	-0.073	0.51	-0.09	0.42	-0.12	0.26	0.063	0.57	0.12	0.3	0.074	0.51	-0.043	0.7	-0.15	0.19	-0.045	0.69
WSB2	blue	0.25	0.025	-0.25	0.025	0.036	0.74	-0.021	0.85	-0.022	0.85	0.27	0.013	0.24	0.026	-0.066	0.55	0.043	0.7	0.28	0.01	0.2	0.067
SLC25A19	blue	-0.082	0.46	0.082	0.46	-0.0071	0.95	0.0054	0.96	-0.019	0.87	-0.13	0.25	-0.1	0.37	0.064	0.56	-0.2	0.075	0.22	0.044	-0.11	0.32
ZMPSTE24	blue	-0.048	0.67	0.048	0.67	-0.14	0.22	0.079	0.48	-0.03	0.79	0.21	0.056	0.13	0.24	-0.11	0.34	-0.078	0.48	-0.24	0.028	-0.12	0.26
DHX37	blue	-0.23	0.035	0.23	0.035	0.00034	1	0.1	0.37	-0.094	0.4	-0.0046	0.97	-0.24	0.027	-0.17	0.12	-0.099	0.37	-0.26	0.019	-0.22	0.047
CARMIL2	blue	-0.15	0.17	0.15	0.17	0.082	0.46	0.26	0.016	0.29	0.0073	-0.03	0.79	-0.08	0.47	-0.022	0.85	-0.098	0.38	-0.12	0.27	-0.057	0.61
MYCT1	blue	0.17	0.13	-0.17	0.13	0.46	1.2e-05	-0.025	0.82	0.16	0.14	-0.14	0.19	-0.094	0.4	0.0034	0.98	0.17	0.12	0.62	3.2e-10	0.31	0.0039
CC2D2A	blue	0.25	0.021	-0.25	0.021	0.3	0.0064	-0.2	0.065	-0.089	0.43	-0.21	0.053	0.06	0.59	0.26	0.019	0.11	0.31	0.53	2.6e-07	0.37	0.00049
CPA3	blue	-0.0093	0.93	0.0093	0.93	0.32	0.0033	0.16	0.15	0.32	0.003	0.086	0.44	0.0048	0.97	-0.066	0.55	0.0027	0.98	0.073	0.51	0.073	0.51
USP38	blue	-0.013	0.91	0.013	0.91	0.13	0.23	0.27	0.013	0.27	0.013	-0.029	0.79	-0.099	0.37	-0.25	0.023	-0.04	0.72	0.094	0.4	0.015	0.89
CRKL	blue	-0.092	0.41	0.092	0.41	0.16	0.15	-0.053	0.63	-0.12	0.3	0.022	0.85	-0.16	0.14	-0.081	0.47	-0.22	0.041	0.13	0.24	-0.12	0.26
TMEM54	blue	-0.19	0.092	0.19	0.092	-0.28	0.011	0.23	0.037	-0.061	0.58	0.44	2.6e-05	0.14	0.22	-0.26	0.016	-0.15	0.17	-0.4	0.00017	-0.3	0.0056
NLE1	blue	-0.053	0.63	0.053	0.63	-0.19	0.086	-0.064	0.56	-0.099	0.37	0.068	0.54	-0.12	0.26	-0.018	0.87	-0.15	0.18	-0.22	0.042	-0.18	0.11
RBFOX2	blue	0.037	0.74	-0.037	0.74	0.28	0.0093	-0.06	0.59	0.013	0.91	-0.042	0.71	-0.16	0.16	-0.076	0.5	0.14	0.22	0.34	0.0015	0.088	0.43
ALDH3A2	blue	0.31	0.0039	-0.31	0.0039	-0.25	0.02	-0.17	0.12	-0.22	0.043	0.13	0.25	0.47	8.9e-06	0.18	0.1	0.17	0.13	0.22	0.049	0.21	0.053
MAP3K9	blue	-0.12	0.27	0.12	0.27	-0.25	0.024	0.0037	0.97	-0.15	0.19	0.42	8.7e-05	0.078	0.48	-0.22	0.046	-0.079	0.48	-0.31	0.005	-0.25	0.021
CRLF3	blue	-0.097	0.38	0.097	0.38	-0.26	0.018	0.1	0.35	-0.073	0.51	0.39	0.00024	0.14	0.2	-0.27	0.014	-0.17	0.12	-0.28	0.0097	-0.23	0.037
PLXNA4	blue	0.24	0.028	-0.24	0.028	0.34	0.0017	-0.11	0.31	0.03	0.79	-0.085	0.44	-0.048	0.67	0.043	0.7	0.12	0.29	0.61	1.1e-09	0.39	0.00027
DDX49	blue	-0.018	0.87	0.018	0.87	-0.25	0.022	-0.11	0.33	-0.24	0.032	0.078	0.48	0.19	0.079	0.09	0.42	0.012	0.92	-0.15	0.19	-0.0085	0.94
FAM219A	blue	-0.25	0.022	0.25	0.022	0.3	0.0053	0.23	0.037	0.19	0.094	-0.098	0.38	-0.34	0.0015	-0.16	0.15	-0.21	0.06	0.23	0.04	-0.16	0.16
S100A1	blue	0.53	2.7e-07	-0.53	2.7e-07	0.19	0.082	-0.26	0.016	-0.024	0.83	-0.37	0.00053	0.085	0.45	0.26	0.016	0.32	0.0028	0.83	7.4e-22	0.67	3.7e-12
LPAR5	blue	-0.16	0.14	0.16	0.14	-0.14	0.2	0.06	0.59	-0.11	0.34	0.34	0.0017	0.057	0.61	-0.19	0.093	-0.2	0.068	-0.35	0.0011	-0.26	0.019
PTPN20	blue	0.3	0.0058	-0.3	0.0058	0.009	0.94	-0.057	0.61	0.0091	0.94	-0.089	0.43	0.096	0.39	0.052	0.64	0.14	0.22	0.36	0.00084	0.35	0.0011
NDUFS2	blue	0.2	0.077	-0.2	0.077	-0.042	0.71	-0.09	0.42	-0.027	0.81	-0.07	0.53	0.017	0.88	0.078	0.49	0.038	0.73	0.23	0.033	0.21	0.06
SERINC2	blue	-0.1	0.36	0.1	0.36	-0.021	0.85	0.16	0.16	0.019	0.86	0.089	0.42	-0.16	0.14	-0.25	0.021	-0.1	0.36	-0.16	0.14	-0.047	0.67
CDK2AP2	blue	-0.14	0.21	0.14	0.21	-0.066	0.55	0.18	0.11	0.026	0.82	0.046	0.68	-0.13	0.23	-0.17	0.12	-0.038	0.73	-0.22	0.047	-0.13	0.25
MT-CO1	blue	0.28	0.012	-0.28	0.012	0.068	0.54	-0.25	0.022	-0.13	0.24	-0.099	0.37	0.14	0.21	0.22	0.045	0.11	0.34	0.43	6.1e-05	0.37	0.0005
MT-ND2	blue	0.19	0.088	-0.19	0.088	-0.061	0.58	-0.18	0.11	-0.14	0.19	-0.068	0.54	0.08	0.47	0.025	0.82	0.11	0.31	0.26	0.018	0.27	0.013
EN1	blue	-0.26	0.016	0.26	0.016	0.16	0.15	0.033	0.77	0.047	0.67	0.12	0.26	-0.14	0.21	0.07	0.53	0.046	0.68	-0.18	0.1	-0.21	0.062
ZNF451	blue	0.025	0.82	-0.025	0.82	0.085	0.45	-0.022	0.84	0.013	0.91	-0.21	0.058	-0.062	0.58	0.14	0.22	-0.038	0.73	0.22	0.049	0.1	0.35
ADH5	blue	0.063	0.57	-0.063	0.57	-0.12	0.27	-0.076	0.49	-0.19	0.083	-0.023	0.84	0.17	0.13	0.15	0.19	0.086	0.44	0.19	0.087	0.16	0.14
CALHM2	blue	0.088	0.43	-0.088	0.43	0.42	7.4e-05	-0.011	0.92	0.28	0.0099	-0.16	0.14	-0.07	0.53	0.23	0.039	0.14	0.19	0.47	6.6e-06	0.28	0.0095
RPL13	blue	0.21	0.053	-0.21	0.053	-0.15	0.17	-0.25	0.022	-0.17	0.12	0.085	0.45	0.21	0.059	0.28	0.012	0.035	0.75	0.25	0.02	0.27	0.015
H3C8	blue	-0.21	0.059	0.21	0.059	-0.1	0.35	-0.036	0.75	-0.11	0.32	-0.022	0.84	-0.055	0.62	0.039	0.72	-0.098	0.38	-0.19	0.082	-0.18	0.096
CCDC80	blue	0.12	0.29	-0.12	0.29	0.6	2.1e-09	-0.046	0.68	0.2	0.071	-0.21	0.059	-0.11	0.34	0.095	0.39	0.21	0.063	0.54	1.3e-07	0.4	0.00018
ODF2L	blue	-0.14	0.19	0.14	0.19	-0.047	0.67	0.37	0.00065	0.2	0.064	0.22	0.048	-0.12	0.28	-0.34	0.0018	-0.17	0.13	-0.25	0.022	-0.14	0.21
SLC35F3	blue	-0.076	0.5	0.076	0.5	-0.15	0.16	-0.1	0.35	-0.22	0.05	-0.047	0.67	-0.18	0.095	-0.036	0.75	-0.047	0.67	-0.2	0.075	-0.14	0.2
ANKRD1	blue	0.31	0.0047	-0.31	0.0047	0.26	0.016	-0.2	0.063	0.023	0.84	-0.26	0.016	-0.063	0.57	0.13	0.25	0.083	0.45	0.76	1.5e-16	0.35	0.0012
UBXN2B	blue	0.043	0.7	-0.043	0.7	0.03	0.79	-0.11	0.3	-0.052	0.64	-0.21	0.055	0.068	0.54	0.27	0.012	-0.00027	1	0.2	0.076	0.12	0.27
AOX1	blue	0.51	7.7e-07	-0.51	7.7e-07	0.28	0.0094	-0.15	0.18	0.13	0.25	-0.09	0.42	0.067	0.55	0.032	0.77	0.32	0.0034	0.71	3.8e-14	0.53	2.3e-07
PLAGL2	blue	-0.12	0.28	0.12	0.28	-0.069	0.54	-0.18	0.1	-0.16	0.14	0.19	0.088	0.23	0.037	0.32	0.0033	-0.061	0.59	-0.14	0.22	-0.037	0.74
PTAR1	blue	-0.13	0.24	0.13	0.24	0.14	0.21	-5.3e-05	1	-0.012	0.92	-0.009	0.94	-0.048	0.67	0.06	0.59	0.065	0.56	0.14	0.2	0.051	0.64
AHRR	blue	-0.052	0.64	0.052	0.64	-0.054	0.63	-0.29	0.009	-0.25	0.023	-0.018	0.87	-0.018	0.87	0.076	0.5	-0.0049	0.96	-0.12	0.29	-0.083	0.46
ESR1	blue	0.048	0.67	-0.048	0.67	0.081	0.47	0.095	0.39	0.068	0.54	0.0056	0.96	0.097	0.38	-0.019	0.86	0.073	0.51	0.26	0.015	0.14	0.22
NPR3	blue	0.21	0.053	-0.21	0.053	0.042	0.71	-0.26	0.018	-0.15	0.17	0.1	0.36	0.36	0.00093	0.17	0.12	0.0089	0.94	0.24	0.031	0.025	0.82
INTS12	blue	0.17	0.14	-0.17	0.14	-0.1	0.36	0.072	0.52	-0.018	0.87	-0.18	0.095	-4.3e-05	1	0.0089	0.94	0.0081	0.94	0.21	0.052	0.22	0.043
CSF3	blue	0.13	0.25	-0.13	0.25	0.054	0.63	-0.0034	0.98	0.032	0.77	0.023	0.84	-0.12	0.28	-0.079	0.48	0.12	0.29	0.34	0.0014	0.14	0.2
EPM2A	blue	0.37	0.00067	-0.37	0.00067	0.1	0.35	0.0084	0.94	0.086	0.44	-0.098	0.38	0.13	0.24	0.09	0.42	0.0051	0.96	0.54	1.1e-07	0.44	3.3e-05
CAP2	blue	0.22	0.046	-0.22	0.046	0.31	0.0049	-0.16	0.14	-0.077	0.49	-0.17	0.13	-0.065	0.56	0.1	0.35	0.083	0.45	0.67	5.4e-12	0.32	0.0029
KLHL40	blue	0.41	0.00012	-0.41	0.00012	0.18	0.098	-0.15	0.17	0.028	0.8	-0.21	0.055	0.05	0.65	0.11	0.33	0.047	0.67	0.88	8.4e-28	0.39	0.00023
FABP3	blue	0.4	0.0002	-0.4	0.0002	0.29	0.0077	-0.24	0.03	0.08	0.47	-0.34	0.0019	0.03	0.79	0.27	0.015	0.15	0.18	0.75	1.8e-16	0.63	1.2e-10
CPM	blue	-0.035	0.75	0.035	0.75	0.2	0.075	0.27	0.012	0.34	0.0016	0.25	0.021	-0.017	0.88	-0.29	0.0073	-0.0011	0.99	-0.12	0.27	-0.064	0.57
BORCS7	blue	0.3	0.0066	-0.3	0.0066	0.15	0.19	0.12	0.29	0.17	0.13	-0.095	0.39	0.063	0.57	0.024	0.83	0.14	0.19	0.4	0.00016	0.4	0.00017
MGP	blue	0.45	1.9e-05	-0.45	1.9e-05	0.46	1.3e-05	-0.22	0.043	0.19	0.088	-0.28	0.012	0.083	0.45	0.34	0.0018	0.36	0.00088	0.63	2.3e-10	0.74	1.3e-15
HPRT1	blue	-0.11	0.32	0.11	0.32	-0.018	0.87	-0.012	0.92	-0.11	0.34	-0.11	0.3	-0.065	0.56	0.073	0.51	-0.038	0.74	-0.13	0.24	-0.068	0.54
YAF2	blue	-0.065	0.56	0.065	0.56	0.16	0.14	0.091	0.41	0.11	0.32	-0.062	0.58	-0.01	0.93	0.078	0.49	-0.04	0.72	0.14	0.19	0.083	0.46
PLPP7	blue	0.15	0.17	-0.15	0.17	0.45	1.6e-05	-0.18	0.1	0.034	0.76	-0.23	0.033	-0.12	0.27	0.25	0.025	0.026	0.82	0.79	1.5e-18	0.29	0.0084
CRYBG1	blue	-0.11	0.31	0.11	0.31	-0.1	0.36	0.29	0.0089	0.057	0.61	0.32	0.0034	-0.027	0.81	-0.35	0.0011	-0.08	0.47	-0.29	0.007	-0.24	0.027
MPDZ	blue	0.21	0.053	-0.21	0.053	0.46	1.5e-05	-0.038	0.74	0.14	0.19	-0.36	0.0008	-0.16	0.15	0.19	0.089	0.12	0.27	0.72	2.9e-14	0.38	0.00034
BRAT1	blue	-0.23	0.036	0.23	0.036	-0.15	0.18	0.06	0.59	-0.13	0.25	-0.00046	1	-0.05	0.65	0.042	0.7	-0.18	0.098	-0.16	0.15	-0.11	0.32
LPAR3	blue	-0.32	0.0034	0.32	0.0034	-0.035	0.75	0.24	0.028	-0.038	0.73	0.23	0.039	-0.25	0.022	-0.32	0.0029	-0.17	0.13	-0.37	0.00055	-0.3	0.0052
PAQR4	blue	-0.16	0.16	0.16	0.16	0.14	0.22	-0.13	0.23	-0.16	0.16	-0.14	0.21	-0.32	0.003	-0.0095	0.93	-0.1	0.35	0.2	0.069	-0.17	0.13
CCDC9	blue	-0.012	0.91	0.012	0.91	-0.069	0.54	-0.081	0.47	-0.051	0.64	0.25	0.021	0.14	0.2	-0.019	0.86	-0.032	0.77	-0.18	0.098	0.0028	0.98
TRIM26	blue	0.034	0.76	-0.034	0.76	-0.062	0.58	0.34	0.0017	0.16	0.14	0.12	0.3	-0.035	0.75	-0.31	0.0049	-0.14	0.21	-0.21	0.055	0.081	0.47
CENPB	blue	0.063	0.57	-0.063	0.57	0.06	0.59	0.041	0.71	0.029	0.79	0.16	0.15	-0.016	0.89	-0.08	0.47	-0.043	0.7	0.13	0.23	0.00058	1
GABPA	blue	0.042	0.7	-0.042	0.7	-0.14	0.21	-0.099	0.38	-0.17	0.12	0.056	0.61	-0.001	0.99	-0.023	0.84	-0.14	0.2	0.17	0.13	-0.039	0.73
AUP1	blue	-0.11	0.34	0.11	0.34	-0.22	0.046	0.029	0.8	-0.16	0.15	0.0018	0.99	-0.12	0.27	-0.068	0.54	-0.15	0.17	-0.24	0.026	-0.17	0.12
DDX41	blue	-0.013	0.9	0.013	0.9	-0.19	0.091	0.094	0.4	-0.038	0.74	0.24	0.031	-0.017	0.88	-0.17	0.13	-0.036	0.74	-0.28	0.0095	-0.15	0.16
FBXO17	blue	-0.0093	0.93	0.0093	0.93	0.18	0.098	-0.066	0.56	0.00089	0.99	-0.24	0.029	-0.2	0.075	0.14	0.22	0.12	0.26	0.22	0.043	0.079	0.48
TTYH3	blue	-0.41	0.00011	0.41	0.00011	0.18	0.099	0.23	0.034	0.12	0.28	-0.14	0.22	-0.38	0.00034	-0.076	0.49	-0.034	0.76	-0.2	0.069	-0.15	0.17
GYPC	blue	0.38	0.00033	-0.38	0.00033	0.48	4e-06	-0.0016	0.99	0.39	0.00024	-0.21	0.054	0.038	0.73	0.16	0.15	0.16	0.14	0.68	1.5e-12	0.61	7.5e-10
PDS5A	blue	-0.017	0.88	0.017	0.88	-0.22	0.043	0.072	0.52	-0.13	0.24	0.068	0.54	0.082	0.46	-0.19	0.082	-0.15	0.17	-0.12	0.27	0.023	0.84
KIF15	blue	-0.11	0.3	0.11	0.3	-0.23	0.036	0.081	0.47	-0.063	0.57	0.018	0.88	0.014	0.9	-0.011	0.92	-0.02	0.86	-0.28	0.012	-0.21	0.059
VANGL2	blue	-0.18	0.11	0.18	0.11	0.032	0.77	-0.18	0.096	-0.16	0.16	-0.047	0.68	0.057	0.61	0.37	0.00052	0.00021	1	-0.12	0.27	-0.011	0.92
ST8SIA1	blue	0.017	0.88	-0.017	0.88	0.24	0.029	-0.072	0.52	0.0032	0.98	-0.061	0.58	-0.061	0.58	0.1	0.35	0.042	0.71	0.28	0.011	0.14	0.2
TMEM140	blue	-0.007	0.95	0.007	0.95	0.27	0.013	0.37	0.00061	0.43	4.5e-05	0.036	0.75	-0.14	0.21	-0.21	0.055	-0.14	0.21	0.26	0.02	0.02	0.86
GEN1	blue	-0.24	0.029	0.24	0.029	-0.27	0.013	0.056	0.62	-0.096	0.39	0.036	0.75	-0.059	0.6	-0.066	0.55	-0.24	0.027	-0.27	0.012	-0.24	0.028
RBP1	blue	-0.33	0.0027	0.33	0.0027	0.063	0.57	0.26	0.018	0.14	0.2	0.21	0.053	-0.26	0.017	-0.2	0.063	-0.15	0.19	-0.36	0.00082	-0.26	0.017
CDC42	blue	0.05	0.65	-0.05	0.65	-0.21	0.061	-0.11	0.32	-0.29	0.0079	0.043	0.7	0.037	0.74	-0.054	0.63	-0.047	0.67	0.094	0.4	-0.021	0.85
CUTC	blue	0.18	0.1	-0.18	0.1	-0.095	0.39	-0.063	0.57	-0.047	0.68	0.079	0.48	0.1	0.37	0.033	0.77	0.012	0.91	0.36	0.00089	0.13	0.23
NEURL4	blue	0.11	0.34	-0.11	0.34	-0.023	0.83	0.08	0.47	-0.037	0.74	-0.12	0.28	-0.16	0.16	-0.083	0.45	-0.02	0.86	0.3	0.0054	0.054	0.62
DACT3	blue	0.025	0.82	-0.025	0.82	0.53	2.3e-07	-0.062	0.58	0.11	0.33	-0.27	0.015	-0.19	0.081	0.22	0.049	0.071	0.52	0.49	2.2e-06	0.27	0.014
RPS2	blue	0.17	0.13	-0.17	0.13	-0.053	0.63	0.015	0.89	0.054	0.63	-0.034	0.76	0.024	0.83	-0.036	0.75	0.12	0.27	0.15	0.17	0.089	0.42
PLCE1	blue	0.27	0.013	-0.27	0.013	0.15	0.16	-0.12	0.27	-0.03	0.79	-0.26	0.017	0.0068	0.95	0.16	0.16	0.062	0.58	0.44	3e-05	0.43	4.8e-05
EBF3	blue	0.17	0.12	-0.17	0.12	0.32	0.0036	-0.023	0.84	0.11	0.34	-0.063	0.57	-0.12	0.27	-0.02	0.86	0.072	0.52	0.48	5.7e-06	0.16	0.16
ANO5	blue	0.4	0.00016	-0.4	0.00016	0.31	0.0049	-0.14	0.2	0.066	0.55	-0.27	0.013	-0.02	0.86	0.14	0.2	0.071	0.52	0.92	1.9e-34	0.52	4e-07
S100A2	blue	-0.25	0.021	0.25	0.021	-0.24	0.027	0.13	0.25	-0.12	0.3	0.34	0.0015	-0.044	0.69	-0.25	0.024	-0.2	0.066	-0.47	6.8e-06	-0.47	9e-06
OAZ1	blue	-0.077	0.49	0.077	0.49	-0.19	0.086	-0.064	0.56	-0.19	0.086	0.16	0.15	0.063	0.57	0.013	0.91	-0.0056	0.96	-0.19	0.08	-0.039	0.72
MT-CO2	blue	0.23	0.039	-0.23	0.039	-0.027	0.81	-0.23	0.035	-0.11	0.34	-0.047	0.67	0.18	0.1	0.12	0.3	0.12	0.3	0.35	0.0011	0.29	0.0076
MMRN1	blue	0.4	0.00016	-0.4	0.00016	0.31	0.0044	0.0039	0.97	0.29	0.0077	0.054	0.63	0.2	0.077	0.026	0.81	0.23	0.038	0.51	9e-07	0.46	1.5e-05
RAB13	blue	-0.19	0.085	0.19	0.085	0.22	0.05	0.019	0.87	0.027	0.81	-0.13	0.26	-0.15	0.17	0.13	0.25	-0.081	0.47	0.15	0.17	0.032	0.77
ZDHHC3	blue	0.15	0.17	-0.15	0.17	-0.075	0.5	-0.22	0.045	-0.21	0.058	0.11	0.34	0.17	0.12	0.14	0.21	0.16	0.15	0.18	0.1	0.027	0.81
ACTG1	blue	-0.22	0.044	0.22	0.044	-0.026	0.82	-0.0031	0.98	-0.089	0.42	0.063	0.57	-0.16	0.14	-0.11	0.31	-0.21	0.062	-0.24	0.031	-0.18	0.096
ANKLE2	blue	-0.25	0.023	0.25	0.023	0.031	0.78	0.097	0.38	-0.027	0.81	0.11	0.32	-0.054	0.63	-0.13	0.23	-0.16	0.14	-0.19	0.083	-0.17	0.13
CACNA2D3	blue	0.21	0.056	-0.21	0.056	0.079	0.48	-0.29	0.0087	-0.13	0.23	0.017	0.88	0.2	0.07	0.31	0.0038	-0.0021	0.99	0.53	3.4e-07	0.25	0.024
ACTN3	blue	0.32	0.0031	-0.32	0.0031	0.18	0.095	-0.1	0.35	0.035	0.76	-0.24	0.026	-0.03	0.79	0.11	0.31	0.02	0.86	0.85	2.3e-24	0.37	0.0006
PPP3CB	blue	0.025	0.82	-0.025	0.82	0.021	0.85	0.092	0.41	-0.0033	0.98	0.012	0.92	-0.17	0.12	-0.15	0.18	-0.045	0.69	0.21	0.056	0.019	0.86
COPS8	blue	-0.16	0.15	0.16	0.15	0.18	0.11	0.019	0.87	0.044	0.69	-0.064	0.57	-0.087	0.44	-0.0078	0.94	-0.059	0.6	0.14	0.2	-0.097	0.38
H2BC8	blue	-0.2	0.069	0.2	0.069	-0.14	0.2	0.15	0.19	0.057	0.61	0.24	0.028	0.045	0.69	-0.097	0.38	-0.12	0.26	-0.3	0.0062	-0.23	0.035
DYNC1LI1	blue	-0.00062	1	0.00062	1	0.027	0.81	0.074	0.51	0.074	0.51	-0.04	0.72	-0.12	0.27	0.026	0.82	-0.019	0.87	0.18	0.098	0.014	0.9
WWTR1	blue	0.1	0.35	-0.1	0.35	0.18	0.097	0.024	0.83	0.21	0.052	0.059	0.6	0.0076	0.95	-0.016	0.89	-0.058	0.6	0.27	0.013	0.14	0.21
PHRF1	blue	-0.2	0.075	0.2	0.075	-0.067	0.55	0.071	0.53	-0.12	0.3	0.092	0.41	-0.017	0.88	-0.18	0.094	-0.12	0.29	-0.19	0.093	-0.11	0.33
SREK1IP1	blue	0.081	0.47	-0.081	0.47	-0.42	8.1e-05	-0.032	0.77	-0.22	0.045	0.31	0.0049	0.23	0.036	-0.17	0.12	-0.14	0.21	-0.28	0.01	-0.15	0.18
TPT1	blue	0.08	0.47	-0.08	0.47	0.066	0.55	0.039	0.73	0.065	0.56	0.1	0.35	0.072	0.52	-0.083	0.46	-0.077	0.49	0.14	0.22	0.14	0.2
IWS1	blue	-0.037	0.74	0.037	0.74	0.047	0.68	-0.12	0.28	-0.18	0.096	-0.034	0.76	-0.038	0.74	0.076	0.49	-0.17	0.12	0.13	0.24	-0.026	0.81
UBE2E2	blue	0.077	0.49	-0.077	0.49	0.21	0.058	0.03	0.79	0.1	0.37	-0.046	0.68	0.054	0.63	0.1	0.35	0.048	0.67	0.22	0.051	0.17	0.13
SH3BGRL3	blue	-0.047	0.68	0.047	0.68	-0.1	0.35	0.098	0.38	0.035	0.75	0.32	0.0027	0.11	0.32	-0.24	0.027	-5.7e-05	1	-0.25	0.024	-0.12	0.27
WFDC1	blue	0.065	0.56	-0.065	0.56	0.25	0.021	-0.016	0.89	0.077	0.49	0.043	0.7	-0.11	0.34	0.012	0.92	0.11	0.31	0.36	0.00091	0.18	0.11
AEBP2	blue	-0.082	0.46	0.082	0.46	0.11	0.32	-0.096	0.39	-0.14	0.2	0.11	0.33	0.0087	0.94	0.13	0.25	-0.022	0.85	-0.065	0.56	0.015	0.9
NOTCH1	blue	-0.029	0.79	0.029	0.79	0.1	0.36	0.053	0.63	0.14	0.21	-0.042	0.71	0.027	0.81	0.15	0.17	0.12	0.28	-0.083	0.46	0.017	0.88
DEF8	blue	-0.077	0.49	0.077	0.49	-0.21	0.059	-0.14	0.21	-0.28	0.011	0.21	0.058	0.096	0.39	0.05	0.65	-0.073	0.51	-0.25	0.025	-0.18	0.11
ZC3HAV1	blue	-0.24	0.026	0.24	0.026	-0.033	0.77	0.27	0.013	0.15	0.16	-0.038	0.73	-0.12	0.26	-0.14	0.2	-0.18	0.097	-0.26	0.016	-0.21	0.06
KHSRP	blue	-0.13	0.23	0.13	0.23	-0.083	0.45	0.057	0.61	-0.03	0.79	0.19	0.09	0.012	0.92	-0.071	0.52	-0.12	0.27	-0.28	0.01	-0.21	0.058
SS18	blue	-0.068	0.54	0.068	0.54	0.056	0.62	0.14	0.19	0.1	0.36	0.13	0.25	-0.031	0.78	-0.12	0.26	-0.088	0.43	-0.13	0.26	0.0028	0.98
TINF2	blue	-0.16	0.15	0.16	0.15	0.056	0.62	0.18	0.097	0.053	0.63	0.13	0.26	-0.032	0.78	-0.086	0.44	-0.12	0.3	0.074	0.5	0.015	0.9
TERF2	blue	0.0081	0.94	-0.0081	0.94	-0.11	0.32	-0.1	0.35	-0.12	0.28	0.075	0.5	0.15	0.18	0.14	0.21	-0.067	0.55	0.077	0.49	0.062	0.58
REPS1	blue	-0.1	0.37	0.1	0.37	-0.14	0.21	-0.058	0.6	-0.081	0.46	0.11	0.32	0.049	0.66	0.12	0.29	-0.092	0.41	-0.18	0.099	-0.032	0.78
MRPS30	blue	-0.0046	0.97	0.0046	0.97	-0.11	0.33	-0.19	0.082	-0.25	0.022	-0.13	0.26	0.026	0.81	0.18	0.11	-0.18	0.11	0.2	0.072	-0.00028	1
MINDY2	blue	0.18	0.11	-0.18	0.11	-0.021	0.85	0.12	0.28	0.11	0.34	0.19	0.088	0.11	0.32	-0.22	0.048	-0.19	0.093	0.2	0.074	0.14	0.2
SLC35D2	blue	-0.04	0.72	0.04	0.72	-0.21	0.062	0.11	0.33	-0.099	0.37	0.09	0.42	0.089	0.42	-0.1	0.37	-0.071	0.52	-0.16	0.15	-0.06	0.59
TTC4	blue	-0.069	0.53	0.069	0.53	-0.12	0.29	0.042	0.71	-0.088	0.43	0.038	0.73	-0.084	0.45	-0.11	0.31	-0.1	0.36	0.065	0.56	-0.064	0.56
TSKU	blue	-0.12	0.28	0.12	0.28	0.17	0.14	-0.0038	0.97	0.031	0.78	0.042	0.71	-0.13	0.24	-0.081	0.47	0.16	0.14	-0.12	0.3	-0.062	0.58
ELN	blue	0.36	0.00088	-0.36	0.00088	0.4	0.00015	-0.12	0.3	0.27	0.012	-0.17	0.13	0.2	0.067	0.3	0.0052	0.22	0.049	0.58	8.2e-09	0.56	4e-08
CRK	blue	0.018	0.87	-0.018	0.87	-0.22	0.042	0.18	0.1	-0.018	0.87	0.055	0.62	0.034	0.76	-0.24	0.031	-0.05	0.66	-0.25	0.02	-0.1	0.36
TUSC3	blue	-0.1	0.36	0.1	0.36	-0.015	0.89	-0.19	0.086	-0.31	0.0039	-0.013	0.9	0.0034	0.98	0.14	0.22	0.072	0.52	-0.2	0.074	-0.072	0.52
TTLL4	blue	-0.18	0.099	0.18	0.099	-0.12	0.3	0.05	0.65	-0.13	0.22	0.029	0.8	-0.09	0.42	0.058	0.6	0.044	0.69	-0.22	0.046	-0.14	0.22
B3GNTL1	blue	0.065	0.56	-0.065	0.56	0.16	0.15	-0.044	0.69	0.032	0.77	-0.34	0.0015	-0.1	0.36	0.27	0.013	-0.0028	0.98	0.35	0.001	0.21	0.058
GRTP1	blue	0.087	0.44	-0.087	0.44	-0.21	0.052	-0.16	0.15	-0.26	0.019	0.08	0.47	0.2	0.067	0.19	0.088	0.1	0.35	-0.12	0.28	0.091	0.41
PPP4R3A	blue	-0.016	0.88	0.016	0.88	-0.088	0.43	0.01	0.93	-0.053	0.64	0.17	0.12	0.22	0.046	0.066	0.55	-0.017	0.88	-0.11	0.33	0.021	0.85
METTL7B	blue	0.22	0.045	-0.22	0.045	0.26	0.017	-0.14	0.2	0.024	0.83	-0.27	0.013	-0.11	0.31	0.15	0.19	0.37	0.00057	0.5	1.8e-06	0.39	0.00032
MYOC	blue	0.55	6.6e-08	-0.55	6.6e-08	0.094	0.4	-0.22	0.047	-0.035	0.75	-0.21	0.063	0.18	0.11	0.17	0.11	0.12	0.3	0.79	4.3e-19	0.6	2e-09
DDX3Y	blue	0.21	0.053	-0.21	0.053	0.24	0.031	-0.09	0.42	0.096	0.39	-0.25	0.022	0.05	0.65	0.27	0.013	0.071	0.52	0.37	0.00053	0.38	0.00046
ZNF385A	blue	-0.21	0.055	0.21	0.055	-0.17	0.12	0.21	0.052	-0.072	0.52	0.32	0.0029	0.00083	0.99	-0.16	0.14	-0.099	0.37	-0.28	0.012	-0.19	0.084
LEO1	blue	-0.17	0.13	0.17	0.13	-0.11	0.33	0.22	0.049	0.033	0.76	0.11	0.33	0.014	0.9	-0.13	0.22	-0.07	0.53	-0.17	0.12	-0.05	0.65
VASP	blue	-0.13	0.23	0.13	0.23	-0.045	0.69	-0.051	0.65	-0.13	0.24	-0.00058	1	-0.085	0.44	0.029	0.79	-0.011	0.92	-0.13	0.23	-0.066	0.55
RBM20	blue	0.53	3.3e-07	-0.53	3.3e-07	0.0031	0.98	-0.27	0.015	-0.11	0.32	0.026	0.81	0.38	0.00045	0.15	0.17	0.12	0.28	0.65	3.5e-11	0.38	0.00033
C10orf88	blue	0.11	0.31	-0.11	0.31	-0.21	0.062	-0.19	0.084	-0.3	0.0056	0.016	0.88	0.15	0.18	0.06	0.59	-0.13	0.23	0.043	0.7	0.0015	0.99
LMF2	blue	-0.15	0.17	0.15	0.17	-0.094	0.4	0.24	0.026	0.12	0.3	0.22	0.043	0.07	0.53	-0.11	0.3	-0.11	0.31	-0.27	0.014	-0.13	0.24
MAPRE3	blue	0.19	0.091	-0.19	0.091	0.21	0.061	-0.25	0.021	-0.14	0.21	-0.11	0.32	0.12	0.27	0.26	0.016	0.07	0.53	0.45	2.1e-05	0.39	0.00026
CAVIN4	blue	0.15	0.18	-0.15	0.18	0.29	0.0072	-0.13	0.24	-0.032	0.77	-0.19	0.089	-0.16	0.16	0.0072	0.95	-0.072	0.52	0.77	1.7e-17	0.14	0.2
ANKEF1	blue	-0.15	0.17	0.15	0.17	-0.079	0.48	0.049	0.66	-0.16	0.15	0.099	0.37	-0.0086	0.94	-0.14	0.22	-0.037	0.74	-0.21	0.055	-0.037	0.74
DOLPP1	blue	-0.19	0.086	0.19	0.086	-0.25	0.024	0.071	0.52	-0.2	0.07	0.048	0.66	-0.013	0.91	-0.12	0.29	-0.14	0.22	-0.36	0.00083	-0.18	0.096
KTN1	blue	-0.036	0.75	0.036	0.75	0.25	0.024	0.075	0.5	0.028	0.8	0.0081	0.94	-0.24	0.032	-0.17	0.13	-0.14	0.2	0.2	0.068	0.0079	0.94
EIF3M	blue	-0.031	0.78	0.031	0.78	-0.22	0.044	0.0068	0.95	-0.1	0.35	0.19	0.088	0.14	0.2	-0.03	0.79	-0.093	0.4	-0.24	0.027	-0.16	0.15
PGRMC1	blue	-0.072	0.52	0.072	0.52	0.011	0.92	0.012	0.91	0.007	0.95	0.066	0.55	0.094	0.4	0.088	0.43	0.066	0.56	-0.079	0.48	0.068	0.54
MYPN	blue	0.22	0.048	-0.22	0.048	0.32	0.0037	-0.15	0.19	0.091	0.41	-0.24	0.029	-0.068	0.54	0.12	0.27	-0.00016	1	0.77	1.1e-17	0.26	0.018
DYRK1B	blue	0.31	0.0049	-0.31	0.0049	0.063	0.57	-0.23	0.038	-0.058	0.6	-0.063	0.57	0.3	0.0067	0.37	0.00066	0.14	0.21	0.41	0.00013	0.45	2.4e-05
RAG1	blue	-0.31	0.0042	0.31	0.0042	0.072	0.52	0.32	0.0031	0.17	0.12	-0.17	0.13	-0.22	0.045	-0.1	0.35	-0.14	0.21	-0.2	0.072	-0.08	0.47
GPAT2	blue	0.14	0.21	-0.14	0.21	0.31	0.0045	-0.023	0.84	0.11	0.33	-0.25	0.025	-0.063	0.57	0.18	0.098	0.072	0.52	0.49	2.3e-06	0.3	0.0055
ACO2	blue	0.16	0.14	-0.16	0.14	0.087	0.43	-0.04	0.72	-0.051	0.65	0.1	0.36	0.17	0.11	0.03	0.79	-0.035	0.75	0.34	0.0016	0.25	0.02
PPM1J	blue	0.19	0.088	-0.19	0.088	-0.056	0.61	-0.075	0.5	-0.14	0.2	-0.29	0.0086	-0.12	0.29	0.19	0.094	0.034	0.76	0.36	0.0007	0.25	0.023
CMBL	blue	0.011	0.92	-0.011	0.92	0.2	0.074	-0.11	0.32	-0.062	0.58	-0.42	8.9e-05	-0.23	0.033	0.18	0.098	-0.041	0.72	0.35	0.001	0.23	0.039
TSEN2	blue	0.062	0.58	-0.062	0.58	-0.052	0.64	0.07	0.53	0.029	0.79	-0.0058	0.96	-0.022	0.85	-0.03	0.79	-0.097	0.38	0.17	0.12	0.12	0.26
ZNF236	blue	-0.048	0.67	0.048	0.67	-0.063	0.57	0.24	0.026	0.098	0.38	0.07	0.53	-0.018	0.87	-0.22	0.043	0.028	0.8	-0.15	0.19	0.067	0.55
MAPRE1	blue	-0.12	0.27	0.12	0.27	-0.029	0.79	0.19	0.078	0.039	0.73	-0.049	0.66	-0.13	0.24	-0.13	0.23	-0.21	0.058	-0.18	0.11	-0.042	0.7
MTUS1	blue	0.16	0.14	-0.16	0.14	0.012	0.92	-0.096	0.39	-0.12	0.27	0.018	0.87	0.17	0.12	0.0035	0.97	-0.017	0.88	0.28	0.011	0.29	0.007
ARL3	blue	0.082	0.46	-0.082	0.46	0.16	0.15	-0.02	0.86	-0.065	0.56	-0.098	0.38	-0.052	0.64	0.084	0.45	0.034	0.76	0.34	0.0015	0.28	0.0094
USP7	blue	0.013	0.91	-0.013	0.91	-0.12	0.26	0.077	0.49	-0.058	0.61	0.034	0.76	-0.015	0.89	-0.074	0.51	-0.15	0.17	0.082	0.46	0.059	0.6
PLCD4	blue	0.061	0.58	-0.061	0.58	0.13	0.25	0.065	0.56	-0.044	0.69	-0.2	0.068	-0.21	0.056	-0.13	0.25	-0.12	0.29	0.39	0.00023	0.1	0.35
ZNF432	blue	0.15	0.19	-0.15	0.19	0.033	0.77	-0.052	0.64	-0.078	0.49	-0.079	0.48	0.11	0.32	0.1	0.36	0.034	0.76	0.34	0.0016	0.23	0.033
WEE1	blue	-0.07	0.53	0.07	0.53	-0.22	0.044	0.13	0.23	-0.052	0.64	0.12	0.27	-0.01	0.93	-0.17	0.13	-0.049	0.66	-0.23	0.036	-0.16	0.15
KIF9	blue	0.38	0.00046	-0.38	0.00046	-0.22	0.048	-0.046	0.68	-0.065	0.56	-0.059	0.6	0.11	0.34	0.0029	0.98	0.0004	1	0.33	0.0021	0.31	0.0049
FEM1A	blue	0.26	0.018	-0.26	0.018	0.19	0.078	-0.1	0.35	0.085	0.45	-0.019	0.87	0.097	0.38	0.13	0.26	0.04	0.72	0.53	2.4e-07	0.29	0.009
CHMP1A	blue	-0.18	0.099	0.18	0.099	-0.085	0.45	0.081	0.47	-0.0025	0.98	0.2	0.068	-0.11	0.34	-0.11	0.31	-0.16	0.14	-0.34	0.0016	-0.21	0.054
TAF3	blue	-0.12	0.27	0.12	0.27	0.12	0.3	0.24	0.03	0.24	0.029	-0.11	0.31	-0.21	0.06	-0.064	0.57	0.0009	0.99	0.27	0.013	0.017	0.88
LAMA2	blue	0.15	0.18	-0.15	0.18	0.63	1.9e-10	-0.03	0.79	0.29	0.0077	-0.17	0.13	-0.091	0.41	0.086	0.44	0.25	0.023	0.47	6.5e-06	0.41	0.00011
DDX27	blue	-0.11	0.34	0.11	0.34	-0.15	0.17	-0.045	0.68	-0.17	0.11	-0.096	0.39	-0.13	0.25	0.071	0.52	0.0046	0.97	-0.13	0.24	-0.03	0.79
SNX24	blue	0.13	0.24	-0.13	0.24	-0.33	0.0022	0.14	0.21	0.02	0.86	0.24	0.027	0.31	0.004	-0.072	0.52	-0.048	0.67	-0.26	0.018	0.15	0.17
MAP2K3	blue	0.18	0.11	-0.18	0.11	-0.14	0.2	-0.01	0.93	0.00019	1	0.088	0.43	0.0068	0.95	-0.11	0.34	-0.019	0.86	0.08	0.47	0.056	0.62
FBLN5	blue	0.22	0.046	-0.22	0.046	0.53	3.3e-07	0.05	0.65	0.28	0.011	-0.2	0.065	-0.048	0.67	0.087	0.43	0.33	0.0025	0.47	9.3e-06	0.52	5.4e-07
TIMM21	blue	0.067	0.55	-0.067	0.55	-0.0075	0.95	-0.21	0.053	-0.19	0.092	-0.075	0.5	0.11	0.31	0.21	0.061	-0.04	0.72	0.17	0.13	0.094	0.4
NUDT9	blue	0.11	0.34	-0.11	0.34	-0.061	0.58	-0.11	0.31	-0.048	0.67	-0.019	0.86	0.076	0.49	0.14	0.22	-0.095	0.39	0.18	0.1	0.2	0.073
MYH6	blue	0.31	0.0044	-0.31	0.0044	0.19	0.085	-0.13	0.26	-0.022	0.84	-0.25	0.022	-0.025	0.82	0.098	0.38	0.013	0.91	0.87	1.8e-26	0.29	0.0077
FAM83H	blue	-0.23	0.032	0.23	0.032	-0.17	0.12	0.051	0.65	-0.091	0.41	0.19	0.093	-0.067	0.55	-0.11	0.3	-0.2	0.072	-0.59	3.3e-09	-0.44	2.9e-05
ESF1	blue	-0.042	0.71	0.042	0.71	0.072	0.52	-0.065	0.56	-0.1	0.36	0.037	0.74	-0.12	0.29	-0.098	0.38	-0.21	0.053	0.12	0.29	-0.15	0.17
RPGR	blue	0.04	0.72	-0.04	0.72	0.11	0.32	0.2	0.077	0.16	0.14	-0.15	0.19	-0.096	0.39	-0.096	0.39	-0.031	0.78	0.16	0.15	0.049	0.66
AKR1B1	blue	-0.05	0.65	0.05	0.65	0.16	0.14	-0.12	0.26	-0.069	0.54	-0.23	0.033	-0.16	0.16	0.21	0.06	-0.024	0.83	0.28	0.0093	0.063	0.57
RASSF7	blue	-0.14	0.2	0.14	0.2	-0.24	0.026	0.043	0.7	-0.2	0.067	0.021	0.85	-0.0083	0.94	-0.092	0.41	-0.22	0.051	-0.3	0.0051	-0.15	0.18
CDKN2A	blue	-0.29	0.007	0.29	0.007	-0.0089	0.94	0.006	0.96	-0.063	0.57	-0.16	0.16	-0.13	0.23	0.11	0.31	-0.15	0.17	-0.19	0.078	-0.16	0.16
SAP130	blue	-0.19	0.088	0.19	0.088	0.028	0.8	0.031	0.78	-0.05	0.65	0.11	0.34	-0.044	0.69	0.023	0.84	-0.06	0.59	-0.16	0.15	-0.032	0.77
LETM1	blue	0.025	0.82	-0.025	0.82	-0.13	0.23	0.022	0.85	-0.099	0.37	0.18	0.096	0.094	0.4	-0.11	0.31	0.058	0.6	-0.22	0.045	-0.14	0.22
C11orf45	blue	-0.054	0.63	0.054	0.63	0.023	0.84	0.062	0.58	-0.054	0.63	-0.057	0.61	-0.11	0.31	-0.21	0.059	-0.075	0.5	-0.16	0.15	-0.072	0.51
ZC3H12A	blue	-0.034	0.76	0.034	0.76	-0.091	0.41	0.16	0.16	0.086	0.44	0.25	0.021	-0.031	0.78	-0.12	0.27	-0.054	0.63	-0.17	0.12	-0.067	0.54
PSMB1	blue	0.037	0.74	-0.037	0.74	-0.1	0.35	-0.0054	0.96	-0.067	0.55	0.026	0.82	0.058	0.6	0.028	0.8	0.069	0.53	0.17	0.13	0.11	0.34
METTL22	blue	0.038	0.73	-0.038	0.73	0.11	0.34	-0.096	0.39	-0.036	0.74	-0.12	0.29	-0.21	0.054	-0.027	0.81	-0.091	0.41	0.35	0.0013	-0.06	0.59
RBM33	blue	0.014	0.9	-0.014	0.9	-0.13	0.23	0.017	0.88	-0.11	0.34	0.21	0.062	0.064	0.57	-0.058	0.6	0.053	0.63	-0.13	0.24	-0.049	0.66
SLIT3	blue	0.38	0.00037	-0.38	0.00037	0.55	8.7e-08	-0.15	0.18	0.24	0.026	-0.084	0.45	0.1	0.36	0.24	0.03	0.46	9.5e-06	0.54	1.5e-07	0.65	2.5e-11
RPL37	blue	0.036	0.75	-0.036	0.75	-0.15	0.17	-0.13	0.25	-0.17	0.12	0.012	0.92	-0.021	0.85	0.096	0.39	0.22	0.045	-0.091	0.41	0.082	0.46
TMEM260	blue	-0.084	0.45	0.084	0.45	-0.037	0.74	0.09	0.42	0.012	0.91	0.13	0.22	0.06	0.59	-0.051	0.64	0.00084	0.99	-0.18	0.095	-0.051	0.64
MOB3A	blue	-0.099	0.37	0.099	0.37	-0.15	0.18	0.25	0.023	0.12	0.28	0.13	0.25	-0.13	0.24	-0.25	0.021	-0.065	0.56	-0.28	0.012	0.004	0.97
DNAJB5	blue	-0.13	0.24	0.13	0.24	0.29	0.0084	0.062	0.58	0.042	0.7	-0.15	0.18	-0.35	0.001	-0.045	0.69	-0.13	0.24	0.42	8.8e-05	-0.029	0.79
ATG9A	blue	-0.048	0.67	0.048	0.67	-0.076	0.49	0.051	0.64	-0.1	0.35	0.17	0.12	-0.04	0.72	-0.12	0.26	0.057	0.61	-0.1	0.37	-0.031	0.78
FABP5	blue	-0.15	0.16	0.15	0.16	-0.24	0.029	0.25	0.025	-0.032	0.77	0.5	1.9e-06	0.089	0.42	-0.37	0.0006	-0.2	0.066	-0.37	0.00057	-0.37	0.00069
CDK5RAP3	blue	0.028	0.8	-0.028	0.8	-0.18	0.11	0.043	0.7	-0.061	0.59	-0.022	0.85	-0.0085	0.94	-0.038	0.73	0.13	0.24	-0.15	0.18	0.11	0.31
SLC25A42	blue	0.071	0.53	-0.071	0.53	0.039	0.73	-0.26	0.017	-0.18	0.11	-0.24	0.032	-0.0029	0.98	0.36	0.00073	0.087	0.44	0.31	0.0047	0.22	0.048
NUS1	blue	0.064	0.56	-0.064	0.56	-0.064	0.57	0.18	0.11	0.11	0.34	0.067	0.55	-0.15	0.18	-0.18	0.095	0.052	0.64	-0.15	0.17	-0.043	0.7
SAMD8	blue	0.011	0.92	-0.011	0.92	0.04	0.72	0.038	0.73	0.067	0.55	0.081	0.46	0.12	0.27	-0.076	0.49	-0.072	0.52	0.12	0.28	-0.00061	1
SUCLG1	blue	0.29	0.0075	-0.29	0.0075	-0.24	0.028	-0.15	0.18	-0.18	0.11	0.095	0.39	0.14	0.2	0.05	0.65	0.034	0.76	0.17	0.12	0.099	0.37
CHID1	blue	-0.074	0.5	0.074	0.5	0.057	0.61	0.099	0.37	0.057	0.61	0.064	0.56	-0.086	0.44	-0.14	0.21	0.032	0.78	-0.15	0.17	0.0031	0.98
GNB5	blue	-0.18	0.096	0.18	0.096	0.056	0.61	-0.092	0.41	-0.18	0.099	0.19	0.08	-0.16	0.14	-0.12	0.26	-0.14	0.19	-0.25	0.023	-0.18	0.096
NUP43	blue	0.015	0.89	-0.015	0.89	-0.2	0.063	-0.036	0.75	-0.26	0.019	-0.09	0.42	-0.018	0.87	0.031	0.78	0.097	0.38	-0.12	0.3	-0.049	0.66
FOXN3	blue	0.18	0.095	-0.18	0.095	0.062	0.58	-0.013	0.9	0.0095	0.93	0.17	0.11	0.12	0.27	-0.029	0.8	0.043	0.7	0.3	0.0056	0.23	0.038
TPM1	blue	0.065	0.56	-0.065	0.56	0.44	2.7e-05	-0.0083	0.94	0.16	0.16	-0.28	0.011	-0.27	0.012	0.18	0.11	0.13	0.25	0.51	9.1e-07	0.34	0.0015
SSH3	blue	-0.097	0.38	0.097	0.38	-0.2	0.066	0.22	0.047	-0.047	0.67	0.2	0.064	-0.019	0.86	-0.32	0.0027	-0.15	0.17	-0.21	0.058	-0.14	0.2
LTBR	blue	-0.079	0.48	0.079	0.48	-0.16	0.15	0.071	0.52	-0.028	0.8	-0.085	0.44	-0.16	0.15	-0.034	0.76	-0.12	0.27	-0.23	0.037	-0.021	0.85
MARVELD3	blue	-0.084	0.45	0.084	0.45	-0.14	0.22	-0.0049	0.96	-0.18	0.099	-0.046	0.68	-0.003	0.98	-0.032	0.77	-0.098	0.38	-0.19	0.089	0.028	0.8
HARS1	blue	0.074	0.51	-0.074	0.51	-0.27	0.013	0.22	0.045	0.046	0.68	0.17	0.13	-0.0059	0.96	-0.27	0.013	0.015	0.9	-0.25	0.021	-0.1	0.37
RIOK1	blue	-0.046	0.68	0.046	0.68	-0.14	0.19	-0.045	0.68	-0.23	0.036	-0.087	0.44	0.0076	0.95	0.13	0.24	-0.037	0.74	-0.11	0.34	-0.019	0.86
HECW1	blue	-0.11	0.3	0.11	0.3	0.24	0.028	-0.027	0.81	-0.019	0.86	-0.14	0.21	-0.24	0.026	-0.0078	0.94	-0.016	0.89	0.21	0.056	0.02	0.86
C11orf96	blue	0.39	0.00025	-0.39	0.00025	0.37	0.00054	-0.29	0.0077	0.079	0.48	-0.25	0.022	-0.023	0.84	0.33	0.0022	0.25	0.025	0.63	1.5e-10	0.55	9.6e-08
STON1	blue	-0.098	0.38	0.098	0.38	0.39	0.00026	0.0078	0.94	0.084	0.45	-0.29	0.0071	-0.25	0.022	0.16	0.14	-0.039	0.73	0.25	0.022	0.21	0.06
DOCK1	blue	0.036	0.75	-0.036	0.75	0.098	0.38	-0.17	0.12	-0.18	0.1	0.0074	0.95	-0.00015	1	0.04	0.72	0.0003	1	0.16	0.15	0.039	0.73
TFAP2C	blue	0.047	0.67	-0.047	0.67	-0.23	0.033	0.074	0.51	-0.096	0.39	0.35	0.001	0.2	0.077	-0.16	0.15	0.22	0.046	-0.27	0.013	0.019	0.87
CHRND	blue	0.18	0.11	-0.18	0.11	0.3	0.0053	-0.084	0.45	0.051	0.65	-0.3	0.0057	-0.16	0.14	0.042	0.7	-0.035	0.75	0.8	1.2e-19	0.2	0.069
EIF4E2	blue	0.14	0.21	-0.14	0.21	-0.18	0.1	-0.16	0.14	-0.23	0.036	-0.052	0.64	0.095	0.39	0.042	0.7	-0.14	0.22	0.079	0.48	0.084	0.45
IMPDH1	blue	-0.19	0.093	0.19	0.093	-0.1	0.35	0.071	0.52	-0.11	0.33	-0.029	0.79	-0.19	0.084	-0.13	0.22	-0.17	0.12	-0.21	0.052	-0.14	0.2
SUB1	blue	0.0028	0.98	-0.0028	0.98	-0.1	0.35	0.11	0.31	-0.019	0.87	0.081	0.47	-0.14	0.21	-0.33	0.0023	-0.051	0.65	-0.17	0.11	-0.096	0.39
SMYD2	blue	0.052	0.64	-0.052	0.64	-0.067	0.55	-0.052	0.64	0.012	0.92	0.22	0.042	0.14	0.22	-0.068	0.54	-0.024	0.83	-0.19	0.079	-0.055	0.62
ATP1B4	blue	0.3	0.0056	-0.3	0.0056	0.26	0.016	-0.11	0.33	0.047	0.67	-0.28	0.0099	-0.027	0.81	0.14	0.22	0.009	0.94	0.87	9e-27	0.37	0.00067
ARHGDIA	blue	-0.19	0.086	0.19	0.086	-0.016	0.89	0.034	0.76	-0.11	0.34	0.015	0.89	-0.22	0.046	-0.078	0.48	-0.14	0.2	-0.24	0.032	-0.24	0.031
SNRNP25	blue	0.014	0.9	-0.014	0.9	-0.13	0.23	-0.07	0.53	-0.19	0.089	-0.1	0.35	-0.086	0.44	0.019	0.87	-0.059	0.6	0.1	0.36	0.00061	1
ARNTL	blue	-0.04	0.72	0.04	0.72	-0.15	0.18	0.0064	0.95	-0.18	0.11	0.058	0.6	0.038	0.73	-0.021	0.85	0.19	0.081	-0.21	0.056	0.0096	0.93
KDM5B	blue	-0.17	0.13	0.17	0.13	-0.14	0.22	0.066	0.55	-0.18	0.099	0.28	0.0094	0.064	0.56	-0.17	0.12	-0.025	0.82	-0.38	0.00042	-0.14	0.2
SOX17	blue	0.27	0.012	-0.27	0.012	0.28	0.012	-0.089	0.43	0.14	0.21	-0.13	0.25	0.082	0.46	0.18	0.11	0.19	0.086	0.7	1.2e-13	0.39	0.00025
RAB11FIP4	blue	0.06	0.59	-0.06	0.59	-0.17	0.13	0.012	0.92	-0.044	0.69	0.18	0.099	0.23	0.034	-0.0045	0.97	0.085	0.44	-0.26	0.018	0.065	0.56
GNL2	blue	0.056	0.61	-0.056	0.61	-0.13	0.24	-0.071	0.53	-0.25	0.024	0.074	0.51	0.032	0.77	-0.065	0.56	0.086	0.44	-0.13	0.25	-0.026	0.82
SLC35E3	blue	0.18	0.11	-0.18	0.11	0.11	0.32	-0.081	0.46	-0.046	0.68	0.1	0.36	0.19	0.089	0.13	0.23	0.13	0.24	0.22	0.041	0.25	0.023
ROMO1	blue	0.082	0.46	-0.082	0.46	-0.2	0.072	-0.012	0.92	-0.11	0.32	0.045	0.69	0.12	0.26	0.12	0.27	0.18	0.11	-0.21	0.057	0.099	0.37
MRPS7	blue	0.063	0.57	-0.063	0.57	-0.32	0.0028	-0.074	0.51	-0.21	0.06	0.17	0.12	0.1	0.35	-0.11	0.33	-0.12	0.29	-0.17	0.12	-0.093	0.41
ARMCX3	blue	0.14	0.19	-0.14	0.19	0.33	0.002	-0.21	0.061	0.036	0.75	-0.29	0.0085	-0.15	0.17	0.36	0.00096	0.11	0.32	0.43	4.8e-05	0.3	0.0051
MIB1	blue	-0.059	0.59	0.059	0.59	0.28	0.0095	0.16	0.15	0.25	0.022	0.083	0.46	-0.034	0.76	-0.083	0.46	0.021	0.85	0.051	0.65	0.031	0.78
RFNG	blue	0.055	0.62	-0.055	0.62	-0.23	0.038	-0.061	0.58	-0.17	0.12	-0.0097	0.93	0.0046	0.97	0.081	0.47	-0.051	0.65	-0.16	0.16	0.017	0.88
SPNS1	blue	-0.09	0.42	0.09	0.42	0.061	0.58	0.086	0.44	0.044	0.69	0.066	0.55	-0.038	0.74	-0.074	0.51	-0.014	0.9	-0.12	0.3	-0.044	0.69
TDRP	blue	-0.12	0.29	0.12	0.29	-0.2	0.076	-0.17	0.14	-0.32	0.003	0.16	0.14	0.024	0.83	0.02	0.86	-0.091	0.41	-0.22	0.047	-0.13	0.26
B3GNT4	blue	-0.22	0.048	0.22	0.048	-0.18	0.1	0.07	0.53	-0.18	0.11	0.091	0.41	-0.17	0.13	-0.12	0.26	0.025	0.82	-0.29	0.0082	-0.22	0.042
IL32	blue	-0.14	0.2	0.14	0.2	0.24	0.028	0.33	0.0021	0.32	0.0034	-0.26	0.017	-0.31	0.0046	-0.075	0.5	-0.14	0.19	0.31	0.0047	0.048	0.67
GSDMC	blue	-0.099	0.37	0.099	0.37	-0.14	0.21	0.25	0.022	0.13	0.24	0.31	0.005	0.033	0.77	-0.32	0.0031	-0.0099	0.93	-0.39	0.00024	-0.27	0.014
SPARCL1	blue	0.4	0.00019	-0.4	0.00019	0.38	0.00046	-0.14	0.19	0.15	0.19	-0.071	0.52	0.12	0.28	0.22	0.047	0.3	0.0062	0.54	1.3e-07	0.51	7.6e-07
RUSC1	blue	-0.13	0.23	0.13	0.23	-0.21	0.063	0.015	0.89	-0.19	0.083	0.076	0.49	0.06	0.59	-0.016	0.88	-0.18	0.1	-0.21	0.053	-0.12	0.28
MED12	blue	-0.04	0.72	0.04	0.72	0.25	0.023	0.29	0.0071	0.26	0.016	-0.044	0.69	-0.07	0.53	-0.2	0.07	-0.066	0.56	0.099	0.37	0.054	0.63
ACTRT3	blue	0.096	0.39	-0.096	0.39	0.15	0.17	0.059	0.6	0.082	0.46	-0.15	0.18	-0.028	0.8	0.077	0.49	-0.093	0.4	0.44	4e-05	0.17	0.12
STX3	blue	0.075	0.5	-0.075	0.5	-0.29	0.0084	-0.012	0.91	-0.14	0.19	0.26	0.019	0.16	0.14	-0.19	0.087	-0.15	0.17	-0.21	0.054	-0.067	0.55
AOC3	blue	0.24	0.029	-0.24	0.029	0.42	6.4e-05	-0.036	0.75	0.19	0.08	-0.14	0.2	-0.065	0.56	0.055	0.62	0.16	0.15	0.54	1.2e-07	0.48	4.1e-06
PLEKHG3	blue	-0.22	0.042	0.22	0.042	0.078	0.48	0.054	0.63	-0.073	0.51	-0.21	0.051	-0.3	0.0051	0.054	0.63	-0.12	0.28	-0.2	0.077	-0.13	0.22
DAAM2	blue	0.26	0.018	-0.26	0.018	0.64	7.4e-11	-0.011	0.92	0.32	0.0035	-0.12	0.28	-0.11	0.31	0.043	0.7	0.23	0.04	0.64	5.6e-11	0.51	7.4e-07
SGCB	blue	0.2	0.067	-0.2	0.067	0.39	0.00025	-0.031	0.78	0.15	0.18	-0.36	0.0009	-0.19	0.092	0.1	0.35	0.056	0.62	0.51	1.1e-06	0.38	0.00043
ARAF	blue	-0.047	0.68	0.047	0.68	-0.0073	0.95	0.15	0.18	0.084	0.45	-0.05	0.65	-0.079	0.48	-0.02	0.85	0.028	0.8	-0.14	0.21	0.047	0.67
C16orf70	blue	-0.0052	0.96	0.0052	0.96	-0.14	0.2	-0.18	0.097	-0.24	0.03	0.2	0.072	0.14	0.2	0.15	0.18	0.31	0.0044	-0.17	0.12	0.093	0.4
LYSMD3	blue	-0.0053	0.96	0.0053	0.96	-0.12	0.27	0.2	0.074	0.056	0.61	0.18	0.11	0.2	0.075	-0.097	0.38	0.14	0.22	-0.097	0.38	0.071	0.52
PSMD10	blue	-0.11	0.33	0.11	0.33	-0.15	0.18	0.098	0.38	-0.0099	0.93	0.012	0.91	0.0014	0.99	-0.022	0.84	-0.15	0.17	-0.19	0.092	-0.046	0.68
TM9SF4	blue	-0.0067	0.95	0.0067	0.95	0.13	0.23	0.075	0.5	0.11	0.34	0.093	0.4	0.066	0.55	-0.097	0.38	-0.11	0.33	0.14	0.2	0.15	0.16
ODF3B	blue	0.037	0.74	-0.037	0.74	-0.094	0.4	0.089	0.42	0.089	0.42	-0.079	0.48	0.074	0.51	0.058	0.6	0.021	0.85	-0.16	0.15	0.13	0.25
TSPAN17	blue	-0.096	0.39	0.096	0.39	0.14	0.2	0.085	0.44	0.14	0.2	-0.097	0.38	-0.11	0.32	-0.004	0.97	0.019	0.86	0.13	0.23	0.096	0.39
ARL2	blue	0.14	0.22	-0.14	0.22	-0.026	0.81	0.088	0.43	0.083	0.46	-0.062	0.58	-0.19	0.092	-0.13	0.23	-0.011	0.92	0.1	0.36	0.1	0.37
AP4M1	blue	-0.14	0.21	0.14	0.21	0.089	0.42	0.29	0.0079	0.15	0.16	-0.11	0.33	-0.31	0.0039	-0.22	0.046	-0.057	0.61	-0.15	0.18	-0.05	0.65
FASN	blue	0.029	0.8	-0.029	0.8	-0.18	0.098	0.049	0.66	-0.018	0.87	0.3	0.0062	0.16	0.14	0.067	0.55	0.42	6.9e-05	-0.38	0.00038	0.0066	0.95
CLN3	blue	0.025	0.82	-0.025	0.82	0.059	0.6	-0.12	0.29	-0.069	0.53	0.012	0.92	-0.049	0.66	0.03	0.79	0.23	0.038	-0.13	0.23	0.13	0.24
REST	blue	-0.19	0.082	0.19	0.082	0.0078	0.94	0.017	0.88	-0.084	0.45	0.053	0.63	-0.062	0.58	-0.18	0.094	-0.22	0.049	-0.19	0.087	-0.085	0.44
MB	blue	0.39	0.00028	-0.39	0.00028	0.22	0.046	-0.25	0.023	0.024	0.83	-0.2	0.065	0.073	0.51	0.22	0.047	0.11	0.31	0.79	6.2e-19	0.42	6.4e-05
CELSR2	blue	-0.15	0.18	0.15	0.18	-0.041	0.71	0.12	0.28	-0.016	0.89	0.44	3.2e-05	0.012	0.92	-0.26	0.019	-0.1	0.37	-0.28	0.0093	-0.18	0.11
NIPBL	blue	-0.18	0.098	0.18	0.098	0.075	0.5	0.083	0.46	0.045	0.69	0.23	0.038	0.0022	0.98	-0.18	0.095	0.025	0.82	-0.11	0.33	-0.026	0.81
ZEB1	blue	0.19	0.082	-0.19	0.082	0.56	3.1e-08	-0.024	0.83	0.37	0.00068	-0.14	0.2	-0.1	0.37	0.066	0.55	0.12	0.26	0.54	1.8e-07	0.28	0.011
MAPKAPK3	blue	0.4	0.00021	-0.4	0.00021	-0.15	0.18	-0.13	0.24	-0.1	0.35	0.13	0.24	0.21	0.062	-0.097	0.38	0.053	0.63	0.31	0.0044	0.24	0.031
HADHB	blue	0.27	0.015	-0.27	0.015	-0.032	0.77	0.036	0.74	-0.012	0.91	0.074	0.5	0.16	0.14	-0.065	0.56	-0.00012	1	0.37	0.00069	0.25	0.025
TRMT1L	blue	0.007	0.95	-0.007	0.95	0.26	0.019	0.21	0.051	0.18	0.1	-0.22	0.049	-0.12	0.27	-0.1	0.36	-0.097	0.38	0.3	0.0056	0.11	0.3
CARNS1	blue	0.41	0.00014	-0.41	0.00014	0.16	0.15	-0.11	0.34	0.035	0.75	-0.24	0.031	0.0048	0.97	0.15	0.17	0.22	0.047	0.77	1.7e-17	0.44	3.4e-05
ENOSF1	blue	0.0034	0.98	-0.0034	0.98	-0.19	0.083	-0.18	0.097	-0.23	0.037	0.069	0.53	0.15	0.18	0.16	0.14	0.14	0.2	-0.18	0.098	0.019	0.86
SARS2	blue	-0.0049	0.96	0.0049	0.96	-0.19	0.079	0.0086	0.94	-0.1	0.35	-0.12	0.29	-0.0088	0.94	0.0081	0.94	-0.048	0.67	-0.11	0.33	0.045	0.69
DYRK4	blue	0.088	0.43	-0.088	0.43	0.086	0.44	-0.0079	0.94	0.046	0.68	-0.068	0.54	0.027	0.81	0.11	0.34	-0.035	0.76	0.23	0.04	0.21	0.054
SMARCD2	blue	-0.14	0.22	0.14	0.22	-0.26	0.019	0.12	0.29	-0.033	0.77	-0.012	0.91	0.025	0.82	0.027	0.81	-0.14	0.21	-0.14	0.22	-0.043	0.7
PPP2R2C	blue	-0.17	0.13	0.17	0.13	-0.23	0.034	0.14	0.21	-0.13	0.25	0.63	1.6e-10	0.049	0.66	-0.43	5.9e-05	-0.18	0.11	-0.49	2.8e-06	-0.48	5.3e-06
KIAA1614	blue	0.032	0.77	-0.032	0.77	0.32	0.0035	0.11	0.34	0.23	0.041	-0.36	0.0009	-0.28	0.012	-0.0015	0.99	-0.059	0.6	0.28	0.011	0.28	0.012
ABCA13	blue	-0.1	0.37	0.1	0.37	0.14	0.2	0.0032	0.98	0.077	0.49	0.086	0.44	0.15	0.18	0.32	0.003	-0.016	0.88	-0.1	0.36	0.091	0.41
MAT2B	blue	-0.031	0.78	0.031	0.78	-0.19	0.082	0.22	0.045	0.085	0.45	0.079	0.48	0.065	0.56	-0.091	0.41	-0.14	0.21	-0.19	0.08	0.062	0.58
NCBP3	blue	-0.0056	0.96	0.0056	0.96	-0.026	0.82	0.1	0.36	-0.058	0.6	-0.0081	0.94	0.0059	0.96	0.0053	0.96	-0.065	0.56	-0.0096	0.93	-0.0011	0.99
COX7A1	blue	0.43	5.5e-05	-0.43	5.5e-05	0.25	0.024	-0.27	0.014	-0.013	0.91	-0.21	0.056	0.082	0.46	0.26	0.018	0.21	0.06	0.75	6.1e-16	0.58	1.2e-08
AIMP1	blue	0.051	0.65	-0.051	0.65	-0.25	0.025	0.069	0.54	-0.12	0.3	-0.13	0.26	-0.13	0.23	-0.12	0.27	-0.11	0.32	-0.11	0.31	-0.049	0.66
RRP36	blue	0.011	0.92	-0.011	0.92	-0.1	0.35	0.12	0.26	0.01	0.93	0.2	0.069	0.0087	0.94	-0.25	0.021	-0.047	0.68	-0.15	0.17	0.071	0.52
C1orf52	blue	0.025	0.82	-0.025	0.82	-0.15	0.16	-0.067	0.55	-0.17	0.12	-0.1	0.36	-0.063	0.57	0.041	0.71	0.04	0.72	0.049	0.66	0.041	0.71
DRG1	blue	-0.053	0.63	0.053	0.63	-0.16	0.14	0.065	0.56	-0.028	0.8	-0.12	0.3	-0.0004	1	-0.022	0.84	-0.1	0.35	-0.13	0.23	0.036	0.74
RHBDL2	blue	0.14	0.21	-0.14	0.21	-0.23	0.033	-0.045	0.69	-0.11	0.32	0.34	0.0017	0.27	0.012	-0.18	0.1	0.0071	0.95	-0.26	0.017	0.12	0.28
NAGA	blue	-0.23	0.038	0.23	0.038	0.34	0.0019	0.16	0.15	0.24	0.032	-0.11	0.33	-0.2	0.069	-0.053	0.63	0.018	0.88	-0.099	0.37	0.0085	0.94
RPP14	blue	0.41	0.00014	-0.41	0.00014	-0.19	0.094	0.012	0.92	0.0012	0.99	0.0089	0.94	0.19	0.084	-0.079	0.48	0.042	0.7	0.23	0.04	0.27	0.014
STIL	blue	-0.39	0.00032	0.39	0.00032	-0.18	0.097	0.34	0.0014	0.069	0.54	-0.062	0.58	-0.17	0.13	-0.16	0.15	-0.086	0.44	-0.38	0.00041	-0.28	0.01
GJB6	blue	-0.2	0.067	0.2	0.067	-0.16	0.15	0.15	0.16	-0.033	0.77	0.55	8.8e-08	0.11	0.31	-0.23	0.037	-0.088	0.43	-0.47	6e-06	-0.34	0.0014
RTCB	blue	-0.1	0.36	0.1	0.36	-0.044	0.69	0.047	0.67	0.0029	0.98	0.099	0.37	-0.073	0.51	0.012	0.91	-0.029	0.79	-0.2	0.065	-0.12	0.27
NUAK2	blue	-0.075	0.5	0.075	0.5	-0.28	0.0097	-0.052	0.64	-0.22	0.045	0.44	2.8e-05	0.2	0.068	-0.089	0.43	-0.21	0.057	-0.38	0.00038	-0.25	0.022
TMEM41A	blue	0.057	0.61	-0.057	0.61	-0.17	0.13	-0.17	0.12	-0.19	0.079	0.072	0.52	0.18	0.11	0.14	0.2	0.15	0.17	-0.12	0.29	-0.024	0.83
TMEM186	blue	0.024	0.83	-0.024	0.83	-0.18	0.11	-0.22	0.045	-0.36	0.00095	0.13	0.25	0.015	0.89	0.0079	0.94	0.13	0.26	-0.17	0.12	-0.04	0.72
DENND5A	blue	0.11	0.33	-0.11	0.33	0.15	0.17	0.04	0.72	0.14	0.19	-0.26	0.017	-0.11	0.3	0.049	0.66	-0.042	0.71	0.26	0.018	0.18	0.1
NUP62CL	blue	-0.27	0.013	0.27	0.013	-0.21	0.06	0.14	0.2	-0.083	0.45	0.029	0.8	-0.18	0.095	-0.28	0.01	-0.19	0.093	-0.31	0.0049	-0.24	0.028
ALDH4A1	blue	0.11	0.31	-0.11	0.31	-0.24	0.027	-0.099	0.37	-0.27	0.014	0.15	0.17	0.17	0.13	-0.093	0.4	-0.00087	0.99	0.057	0.61	-0.01	0.93
GPRC5B	blue	0.35	0.0013	-0.35	0.0013	0.29	0.0072	-0.24	0.026	0.0043	0.97	-0.36	0.00096	0.086	0.44	0.47	6.4e-06	0.19	0.084	0.58	9.9e-09	0.55	5.4e-08
ANO6	blue	-0.087	0.43	0.087	0.43	0.27	0.013	0.18	0.11	0.16	0.15	-0.05	0.66	-0.17	0.12	-0.013	0.91	0.12	0.28	0.14	0.2	0.066	0.56
ESPN	blue	0.065	0.56	-0.065	0.56	-0.26	0.017	-0.27	0.013	-0.28	0.0091	0.06	0.59	0.24	0.028	0.18	0.11	0.046	0.68	-0.19	0.08	0.11	0.33
KCNJ12	blue	0.11	0.32	-0.11	0.32	0.33	0.0023	0.0093	0.93	0.13	0.25	-0.17	0.14	-0.17	0.12	-0.031	0.78	-0.021	0.85	0.54	1.6e-07	0.23	0.033
UNC45B	blue	0.24	0.029	-0.24	0.029	0.36	0.00092	-0.14	0.21	0.07	0.53	-0.3	0.0055	-0.072	0.52	0.15	0.16	0.011	0.92	0.84	6.4e-23	0.32	0.0033
PREX2	blue	0.09	0.42	-0.09	0.42	0.64	9.7e-11	0.047	0.67	0.36	0.00071	-0.14	0.21	-0.22	0.042	-0.017	0.88	0.088	0.43	0.63	1.8e-10	0.24	0.028
CASTOR2	blue	-0.025	0.82	0.025	0.82	0.079	0.48	-0.03	0.79	-0.14	0.21	-0.064	0.56	-0.12	0.29	-0.046	0.68	-0.054	0.63	0.28	0.0093	0.013	0.91
PTGER4	blue	0.28	0.011	-0.28	0.011	0.19	0.091	0.096	0.39	0.26	0.017	-0.06	0.59	0.041	0.72	-0.015	0.89	0.16	0.15	0.29	0.0089	0.33	0.0026
DDX1	blue	0.13	0.26	-0.13	0.26	-0.09	0.42	-0.11	0.31	-0.23	0.033	0.17	0.12	0.098	0.38	-0.06	0.59	0.0054	0.96	0.099	0.37	0.028	0.8
CLEC14A	blue	0.27	0.014	-0.27	0.014	0.33	0.002	0.072	0.52	0.31	0.0038	-0.11	0.31	0.018	0.87	0.048	0.66	0.34	0.0016	0.35	0.0011	0.37	0.00052
GPC3	blue	0.22	0.044	-0.22	0.044	0.28	0.01	-0.32	0.0032	0.034	0.76	-0.3	0.0051	0.1	0.34	0.62	5.1e-10	0.17	0.12	0.46	1e-05	0.42	8.9e-05
SAR1B	blue	0.038	0.73	-0.038	0.73	-0.00066	1	0.043	0.7	-0.018	0.87	0.082	0.46	0.18	0.1	-0.074	0.51	-0.095	0.39	0.23	0.039	0.26	0.018
XDH	blue	-0.034	0.76	0.034	0.76	-0.27	0.013	0.29	0.0086	0.074	0.51	0.18	0.096	-0.02	0.86	-0.29	0.0069	-0.12	0.29	-0.38	0.00045	-0.081	0.47
CLDND1	blue	-0.064	0.57	0.064	0.57	-0.17	0.12	-0.085	0.44	-0.19	0.081	0.023	0.84	0.094	0.4	0.14	0.19	-0.026	0.82	-0.18	0.1	-0.12	0.28
COA3	blue	0.094	0.4	-0.094	0.4	-0.35	0.001	-0.18	0.11	-0.27	0.013	0.17	0.12	0.23	0.041	0.061	0.58	-0.045	0.68	-0.21	0.055	-0.023	0.83
PPP2R3B	blue	0.12	0.29	-0.12	0.29	0.065	0.56	-0.043	0.7	-0.048	0.66	-0.2	0.074	-0.099	0.37	0.14	0.22	0.099	0.38	0.21	0.061	0.18	0.11
RACK1	blue	-0.024	0.83	0.024	0.83	-0.059	0.6	0.11	0.33	0.096	0.39	0.069	0.53	-0.037	0.74	-0.095	0.39	0.032	0.78	-0.15	0.16	-0.016	0.89
HIRA	blue	-0.029	0.8	0.029	0.8	-0.18	0.098	0.16	0.16	0.056	0.62	0.062	0.58	-0.043	0.7	-0.19	0.084	-0.18	0.11	-0.21	0.062	-0.12	0.29
B3GNT3	blue	-0.029	0.79	0.029	0.79	-0.1	0.35	-0.055	0.62	-0.16	0.15	0.033	0.77	0.03	0.79	-0.0051	0.96	-0.079	0.48	-0.15	0.18	0.079	0.48
CYB5B	blue	0.014	0.9	-0.014	0.9	-0.28	0.011	-0.034	0.76	-0.24	0.026	0.21	0.056	0.088	0.43	-0.093	0.4	-0.095	0.39	-0.19	0.08	-0.1	0.35
SLC49A4	blue	-0.028	0.8	0.028	0.8	-0.17	0.13	-0.029	0.79	-0.12	0.28	0.2	0.071	0.1	0.35	-0.066	0.56	0.057	0.61	-0.15	0.19	-0.029	0.8
TFAM	blue	-0.12	0.28	0.12	0.28	-0.26	0.016	-0.024	0.83	-0.21	0.061	-0.061	0.58	0.027	0.81	0.034	0.76	-0.14	0.22	-0.23	0.035	-0.14	0.2
SMC5	blue	0.03	0.79	-0.03	0.79	-0.046	0.68	0.065	0.56	0.046	0.68	-0.12	0.26	0.012	0.92	0.056	0.61	-0.08	0.47	0.19	0.085	0.071	0.53
ZFP64	blue	-0.2	0.07	0.2	0.07	0.16	0.15	-0.17	0.13	-0.083	0.46	-0.056	0.62	-0.023	0.84	0.24	0.03	-0.048	0.66	-0.073	0.51	-0.03	0.78
JPH2	blue	0.28	0.01	-0.28	0.01	0.27	0.012	-0.019	0.86	0.088	0.43	-0.34	0.0016	-0.25	0.021	-0.081	0.47	0.094	0.4	0.7	1.3e-13	0.34	0.0014
MRPL3	blue	-0.22	0.049	0.22	0.049	-0.17	0.13	-0.16	0.14	-0.29	0.0072	0.0027	0.98	-0.041	0.71	0.092	0.41	-0.11	0.32	-0.23	0.04	-0.21	0.058
PYGO1	blue	0.32	0.0028	-0.32	0.0028	0.26	0.016	-0.19	0.083	0.008	0.94	-0.13	0.22	0.17	0.12	0.28	0.012	0.43	4.3e-05	0.57	1.5e-08	0.43	5e-05
MAP3K14	blue	0.23	0.038	-0.23	0.038	-0.027	0.81	0.08	0.47	0.077	0.49	-0.043	0.7	0.026	0.82	-0.085	0.45	0.12	0.27	0.26	0.016	0.13	0.23
MTURN	blue	0.18	0.1	-0.18	0.1	0.077	0.49	-0.25	0.022	-0.17	0.12	-0.055	0.62	0.073	0.51	0.15	0.18	0.16	0.15	0.36	0.00075	0.28	0.011
POR	blue	-0.015	0.89	0.015	0.89	-0.14	0.19	-0.08	0.47	-0.13	0.23	0.12	0.3	0.15	0.18	0.21	0.061	0.13	0.26	-0.13	0.25	0.0099	0.93
CTSG	blue	0.36	0.0008	-0.36	0.0008	0.33	0.0026	0.0023	0.98	0.28	0.011	-0.14	0.19	0.021	0.85	0.081	0.46	0.38	0.00047	0.61	9.9e-10	0.42	7.7e-05
CLEC5A	blue	-0.095	0.39	0.095	0.39	0.25	0.021	0.076	0.5	0.28	0.0098	0.059	0.6	-0.11	0.31	0.039	0.73	-0.011	0.92	-0.084	0.45	-0.039	0.73
PHTF2	blue	-0.063	0.57	0.063	0.57	0.28	0.011	0.053	0.63	0.074	0.51	-0.26	0.02	-0.25	0.024	0.012	0.91	-0.075	0.5	0.43	4.7e-05	0.072	0.52
AKIP1	blue	-0.2	0.071	0.2	0.071	-0.1	0.36	0.15	0.19	0.014	0.9	-0.0093	0.93	-0.15	0.16	-0.15	0.18	-2.8e-05	1	-0.2	0.063	-0.15	0.19
SF1	blue	-0.064	0.56	0.064	0.56	-0.12	0.27	0.071	0.53	-0.0042	0.97	0.079	0.48	-0.033	0.76	-0.064	0.57	0.14	0.2	-0.21	0.056	-0.17	0.12
DEPTOR	blue	0.51	9.2e-07	-0.51	9.2e-07	0.085	0.45	-0.25	0.02	-0.078	0.48	-0.21	0.053	0.27	0.012	0.28	0.012	0.25	0.022	0.63	2.5e-10	0.64	4.7e-11
RNF145	blue	-0.1	0.35	0.1	0.35	-0.18	0.11	0.19	0.088	-0.036	0.75	0.25	0.025	-0.0013	0.99	-0.18	0.1	-0.037	0.74	-0.2	0.065	-0.079	0.47
ERBIN	blue	-0.042	0.71	0.042	0.71	0.12	0.27	-0.004	0.97	0.027	0.81	0.061	0.59	0.013	0.91	-0.0083	0.94	-0.11	0.31	0.15	0.19	0.046	0.68
XIRP2	blue	0.28	0.011	-0.28	0.011	0.28	0.011	-0.2	0.071	0.021	0.85	-0.24	0.026	0.0067	0.95	0.18	0.11	0.0039	0.97	0.84	1.8e-23	0.27	0.012
RCC2	blue	-0.23	0.041	0.23	0.041	-0.045	0.69	0.22	0.045	0.1	0.36	0.21	0.057	-0.1	0.35	-0.12	0.29	-0.17	0.12	-0.3	0.0051	-0.31	0.005
EPB41L2	blue	0.11	0.32	-0.11	0.32	0.46	1.5e-05	0.069	0.54	0.22	0.044	-0.4	0.00018	-0.26	0.019	0.098	0.38	0.19	0.083	0.41	0.0001	0.25	0.022
RSL24D1	blue	0.035	0.75	-0.035	0.75	-0.0016	0.99	-0.0045	0.97	0.022	0.84	-0.11	0.33	0.049	0.66	0.17	0.13	-0.11	0.31	0.12	0.3	0.047	0.67
ACKR3	blue	-0.25	0.024	0.25	0.024	0.31	0.0042	-0.15	0.18	-0.062	0.58	-0.2	0.075	-0.18	0.1	0.3	0.0064	-0.019	0.87	0.17	0.12	-0.074	0.51
SNX11	blue	0.015	0.89	-0.015	0.89	-0.2	0.068	0.12	0.3	-0.026	0.81	0.27	0.015	0.041	0.72	-0.21	0.059	0.02	0.85	-0.18	0.095	-0.03	0.79
SORBS3	blue	-0.008	0.94	0.008	0.94	0.048	0.67	-0.14	0.2	-0.092	0.41	-0.058	0.6	0.02	0.86	0.16	0.15	-0.13	0.24	0.15	0.18	0.12	0.27
NR2F6	blue	0.087	0.43	-0.087	0.43	-0.22	0.045	-0.1	0.35	-0.18	0.1	0.097	0.38	0.16	0.16	0.078	0.48	0.0066	0.95	-0.097	0.39	0.042	0.7
NRG4	blue	-0.14	0.2	0.14	0.2	-0.068	0.54	-0.094	0.4	-0.28	0.012	0.025	0.82	0.11	0.32	0.0023	0.98	-0.047	0.67	-0.11	0.31	-0.026	0.82
PRKAB1	blue	-0.003	0.98	0.003	0.98	-0.048	0.67	-0.011	0.92	-0.067	0.55	0.087	0.43	0.049	0.66	-0.026	0.81	0.2	0.069	-0.15	0.16	0.081	0.47
ATXN7	blue	0.068	0.54	-0.068	0.54	-0.23	0.041	0.14	0.19	0.0076	0.95	0.1	0.35	0.078	0.49	-0.11	0.31	0.075	0.5	-0.17	0.13	-0.0058	0.96
GET3	blue	-0.011	0.92	0.011	0.92	-0.17	0.13	0.14	0.2	0.044	0.69	0.12	0.29	0.062	0.58	-0.19	0.086	-0.013	0.91	-0.22	0.042	-0.15	0.17
RMI2	blue	-0.36	0.00086	0.36	0.00086	-0.07	0.53	0.067	0.54	-0.17	0.12	-0.1	0.36	-0.21	0.057	-0.024	0.83	-0.068	0.54	-0.3	0.0067	-0.27	0.015
ESD	blue	-0.043	0.7	0.043	0.7	-0.053	0.63	0.061	0.59	-0.028	0.8	0.06	0.59	0.0022	0.98	-0.022	0.84	-0.068	0.54	0.067	0.55	0.01	0.93
LPCAT2	blue	-0.17	0.11	0.17	0.11	-0.057	0.61	0.0077	0.94	-0.1	0.35	0.011	0.92	-0.18	0.11	-0.063	0.57	-0.04	0.72	-0.17	0.12	-0.13	0.24
POLA2	blue	-0.15	0.16	0.15	0.16	-0.23	0.037	0.17	0.12	-0.055	0.62	0.025	0.82	-0.078	0.48	-0.15	0.17	0.0092	0.93	-0.25	0.024	-0.22	0.048
SMN2	blue	-0.039	0.72	0.039	0.72	-0.21	0.052	0.17	0.13	0.039	0.73	0.16	0.14	0.12	0.26	-0.16	0.16	0.057	0.61	-0.18	0.11	-0.087	0.43
PXDNL	blue	-0.04	0.72	0.04	0.72	0.29	0.0086	-0.037	0.74	0.028	0.8	-0.18	0.1	-0.1	0.36	0.11	0.32	-0.03	0.79	0.43	5e-05	0.13	0.24
CEP95	blue	-0.12	0.29	0.12	0.29	-0.18	0.1	-0.026	0.82	-0.12	0.26	-0.17	0.12	-0.12	0.27	0.055	0.62	-0.04	0.72	-0.14	0.22	-0.12	0.28
ABRA	blue	0.38	0.00033	-0.38	0.00033	0.16	0.14	-0.15	0.18	-0.00059	1	-0.21	0.058	0.023	0.84	0.12	0.28	0.038	0.74	0.87	1e-26	0.4	0.00021
ZNF589	blue	0.062	0.58	-0.062	0.58	-0.089	0.43	0.051	0.65	0.0022	0.98	0.27	0.014	0.15	0.18	0.044	0.69	0.13	0.26	-0.15	0.19	0.062	0.58
PTGFR	blue	0.28	0.0097	-0.28	0.0097	0.44	2.7e-05	-0.11	0.34	0.26	0.016	-0.18	0.11	0.00086	0.99	0.27	0.013	0.29	0.0073	0.57	1.3e-08	0.4	0.0002
TIAM2	blue	-0.039	0.73	0.039	0.73	0.31	0.0048	0.037	0.74	0.02	0.86	-0.13	0.26	-0.14	0.19	0.11	0.33	0.1	0.36	0.21	0.056	0.16	0.14
BLOC1S6	blue	0.0054	0.96	-0.0054	0.96	0.054	0.63	-0.11	0.32	-0.15	0.16	-0.076	0.5	-0.026	0.81	0.017	0.88	0.1	0.36	0.14	0.22	0.025	0.82
CORO6	blue	0.13	0.25	-0.13	0.25	0.24	0.027	-0.31	0.0039	-0.18	0.11	-0.31	0.0041	-0.14	0.22	0.24	0.026	-0.049	0.66	0.75	5e-16	0.17	0.13
EML5	blue	-0.22	0.045	0.22	0.045	0.13	0.22	0.00063	1	-0.027	0.81	0.14	0.2	0.054	0.63	0.095	0.39	-0.084	0.45	-0.13	0.25	-0.071	0.52
MOB3C	blue	-0.11	0.32	0.11	0.32	-0.18	0.11	-0.0044	0.97	-0.19	0.086	-0.14	0.19	0.0039	0.97	0.14	0.22	-0.024	0.83	-0.12	0.28	-0.033	0.76
MBOAT7	blue	-0.079	0.48	0.079	0.48	-0.18	0.11	-0.046	0.68	-0.19	0.092	0.079	0.48	-0.059	0.59	-0.15	0.18	-0.09	0.42	-0.21	0.06	-0.14	0.21
CCSER2	blue	-0.1	0.35	0.1	0.35	0.25	0.02	0.00095	0.99	0.044	0.69	0.079	0.48	-0.037	0.74	0.019	0.86	-0.059	0.59	0.18	0.1	0.074	0.51
PIGQ	blue	-0.0081	0.94	0.0081	0.94	-0.072	0.52	0.028	0.8	-0.0055	0.96	-0.0093	0.93	-0.05	0.65	-0.017	0.88	0.12	0.27	-0.19	0.086	0.14	0.22
HSPA12A	blue	-0.17	0.11	0.17	0.11	0.33	0.0021	-0.032	0.78	0.022	0.85	-0.055	0.62	-0.33	0.0025	-0.08	0.47	-0.1	0.35	0.18	0.1	-0.034	0.76
ANKHD1-EIF4EBP3	blue	0.24	0.031	-0.24	0.031	-0.28	0.0095	0.17	0.12	-0.032	0.77	0.27	0.015	0.2	0.068	-0.22	0.046	0.12	0.28	-0.18	0.1	0.17	0.12
FAM111B	blue	-0.3	0.0051	0.3	0.0051	-0.17	0.14	0.22	0.05	-0.054	0.63	0.0079	0.94	-0.16	0.15	-0.3	0.0053	-0.16	0.16	-0.33	0.0022	-0.34	0.0017
CHST2	blue	-0.44	3.1e-05	0.44	3.1e-05	-0.022	0.84	0.26	0.018	0.05	0.65	0.26	0.016	-0.19	0.08	-0.22	0.05	-0.14	0.2	-0.32	0.0035	-0.31	0.0048
SEMA5B	blue	-0.11	0.31	0.11	0.31	0.3	0.0061	-0.07	0.53	0.056	0.61	-0.18	0.11	-0.13	0.23	0.21	0.051	0.11	0.33	0.17	0.12	0.13	0.24
EVC	blue	0.044	0.69	-0.044	0.69	0.31	0.0039	0.03	0.79	0.18	0.11	-0.08	0.47	-0.17	0.12	0.025	0.82	-0.028	0.8	0.13	0.24	0.12	0.27
GRIP2	blue	0.13	0.23	-0.13	0.23	0.18	0.1	0.18	0.11	0.2	0.068	0.11	0.32	-0.038	0.73	-0.097	0.38	-0.087	0.44	0.33	0.0022	0.16	0.14
SIVA1	blue	-0.019	0.87	0.019	0.87	-0.07	0.53	-0.07	0.53	-0.045	0.69	-0.16	0.14	-0.038	0.74	0.19	0.085	-0.0013	0.99	0.13	0.23	0.032	0.78
CFL2	blue	0.19	0.08	-0.19	0.08	0.27	0.014	0.052	0.64	0.15	0.17	-0.12	0.26	-0.016	0.88	0.012	0.92	0.036	0.75	0.64	6.7e-11	0.34	0.0016
SPA17	blue	-0.0043	0.97	0.0043	0.97	-0.083	0.46	0.12	0.3	0.001	0.99	0.12	0.27	0.015	0.89	-0.036	0.75	0.013	0.91	-0.11	0.31	0.079	0.48
ACAT1	blue	0.29	0.0085	-0.29	0.0085	-0.011	0.92	-0.026	0.82	0.12	0.29	-0.011	0.92	0.032	0.77	0.05	0.65	0.17	0.12	0.3	0.0057	0.25	0.021
DES	blue	0.26	0.016	-0.26	0.016	0.31	0.0043	-0.17	0.12	0.05	0.65	-0.21	0.056	-0.038	0.74	0.13	0.23	0.11	0.34	0.73	4.2e-15	0.23	0.034
GABARAP	blue	0.1	0.36	-0.1	0.36	0.16	0.15	0.044	0.7	0.072	0.52	0.083	0.46	0.059	0.6	0.035	0.75	0.14	0.22	0.28	0.012	0.22	0.045
PDF	blue	-0.14	0.21	0.14	0.21	-0.21	0.054	0.094	0.4	-0.06	0.59	0.12	0.28	-0.015	0.89	-0.061	0.58	-0.037	0.74	-0.22	0.041	-0.16	0.15
RNF26	blue	-0.3	0.0053	0.3	0.0053	-0.094	0.4	0.25	0.026	0.052	0.64	0.15	0.17	-0.12	0.27	-0.3	0.0067	-0.13	0.24	-0.35	0.0011	-0.24	0.031
CC2D1B	blue	-0.045	0.69	0.045	0.69	-0.094	0.4	0.26	0.02	-0.016	0.89	0.22	0.046	0.035	0.75	-0.28	0.0099	0.057	0.61	-0.17	0.14	-0.058	0.6
RER1	blue	-0.11	0.33	0.11	0.33	-0.16	0.15	0.12	0.29	0.038	0.73	0.096	0.39	0.083	0.45	0.00037	1	0.008	0.94	-0.25	0.021	-0.035	0.76
CENPBD1	blue	-0.16	0.14	0.16	0.14	0.057	0.61	0.018	0.88	0.0005	1	-0.15	0.19	-0.022	0.84	0.23	0.037	-0.057	0.61	-0.091	0.41	-0.024	0.83
FIS1	blue	0.14	0.2	-0.14	0.2	-0.013	0.9	-0.3	0.0065	-0.24	0.027	-0.032	0.77	0.14	0.22	0.29	0.0087	-0.001	0.99	0.25	0.025	0.24	0.029
TFPI	blue	0.18	0.11	-0.18	0.11	0.25	0.025	-0.081	0.46	0.091	0.41	-0.087	0.44	0.12	0.28	0.11	0.31	0.098	0.38	0.34	0.0015	0.2	0.076
RAB3IP	blue	-0.09	0.42	0.09	0.42	-0.12	0.28	0.058	0.6	-0.062	0.58	0.16	0.15	0.15	0.19	0.12	0.28	-0.12	0.26	-0.17	0.14	-0.087	0.43
MARCO	blue	0.023	0.83	-0.023	0.83	0.29	0.0074	-0.069	0.53	0.24	0.027	-0.024	0.83	-0.092	0.41	0.055	0.62	-0.013	0.91	0.19	0.083	0.089	0.42
ST3GAL3	blue	0.083	0.45	-0.083	0.45	0.22	0.049	-0.16	0.16	-0.1	0.36	-0.24	0.03	-0.086	0.44	0.24	0.027	0.00091	0.99	0.48	5.4e-06	0.22	0.047
PFKP	blue	-0.25	0.025	0.25	0.025	-0.13	0.23	-0.058	0.6	-0.056	0.62	0.17	0.11	0.0019	0.99	0.085	0.45	-0.1	0.36	-0.27	0.013	-0.27	0.015
LYPD6B	blue	-0.091	0.41	0.091	0.41	-0.12	0.28	0.062	0.58	-0.016	0.89	0.17	0.13	0.2	0.065	0.043	0.7	0.24	0.03	-0.19	0.078	0.013	0.91
MLLT11	blue	-0.25	0.024	0.25	0.024	0.31	0.0041	-0.17	0.13	-0.11	0.33	-0.24	0.031	-0.15	0.17	0.33	0.0021	-0.044	0.69	0.18	0.1	-0.084	0.45
LIPT1	blue	0.26	0.02	-0.26	0.02	0.038	0.73	-0.04	0.72	-0.004	0.97	-0.13	0.23	0.15	0.17	0.074	0.51	0.24	0.026	0.33	0.0024	0.3	0.0062
CRTC1	blue	0.11	0.33	-0.11	0.33	0.14	0.22	-0.011	0.92	0.076	0.49	-0.028	0.8	0.0089	0.94	0.073	0.51	0.043	0.7	0.29	0.0082	0.19	0.082
ARHGAP39	blue	0.066	0.55	-0.066	0.55	-0.18	0.11	-0.16	0.16	-0.24	0.026	0.13	0.24	0.12	0.26	0.032	0.77	-0.047	0.67	-0.13	0.25	-0.081	0.47
BID	blue	-0.23	0.04	0.23	0.04	0.045	0.68	-0.15	0.18	-0.074	0.51	-0.031	0.78	-0.0094	0.93	0.32	0.003	-0.037	0.74	-0.14	0.2	-0.06	0.59
CXCL16	blue	0.059	0.59	-0.059	0.59	0.019	0.87	0.18	0.11	0.26	0.019	0.1	0.35	0.15	0.18	-0.067	0.55	-0.041	0.72	-0.11	0.3	0.14	0.21
MSI2	blue	-0.064	0.57	0.064	0.57	0.081	0.47	0.0034	0.98	-0.056	0.62	-0.16	0.14	0.039	0.72	0.15	0.18	-0.054	0.63	0.27	0.015	0.17	0.12
AP3M1	blue	-0.091	0.41	0.091	0.41	-0.074	0.51	-0.089	0.42	-0.15	0.17	0.19	0.083	0.16	0.16	0.0099	0.93	0.025	0.82	-0.19	0.08	-0.11	0.32
TREM2	blue	-0.31	0.0043	0.31	0.0043	0.19	0.081	0.19	0.09	0.19	0.09	-0.13	0.24	-0.3	0.0056	-0.12	0.29	-0.15	0.16	-0.16	0.14	-0.083	0.45
GAR1	blue	-0.063	0.57	0.063	0.57	-0.26	0.016	0.18	0.1	0.018	0.87	0.15	0.18	0.028	0.8	-0.039	0.72	-0.046	0.68	-0.3	0.0053	-0.14	0.22
TBX3	blue	0.16	0.14	-0.16	0.14	0.36	0.00076	-0.017	0.88	0.24	0.027	-0.15	0.16	-0.088	0.43	0.12	0.26	0.079	0.48	0.31	0.004	0.3	0.0067
MUL1	blue	0.23	0.035	-0.23	0.035	-0.12	0.29	-0.079	0.48	-0.16	0.14	0.13	0.23	0.2	0.073	-0.072	0.52	-0.076	0.49	0.15	0.17	0.037	0.74
SRGAP2	blue	-0.13	0.24	0.13	0.24	0.12	0.26	-0.099	0.37	-0.091	0.41	-0.067	0.55	-0.052	0.64	0.13	0.22	-0.017	0.88	0.14	0.22	-0.15	0.19
PRRC1	blue	-0.072	0.52	0.072	0.52	0.16	0.15	0.046	0.68	0.015	0.9	0.025	0.82	-0.016	0.88	-0.013	0.91	-0.027	0.81	-0.047	0.67	-0.039	0.73
SNRPF	blue	-0.17	0.13	0.17	0.13	-0.33	0.0026	-0.062	0.58	-0.25	0.022	0.28	0.0092	0.088	0.43	-0.1	0.36	0.037	0.74	-0.31	0.004	-0.27	0.015
EFCAB11	blue	-0.0014	0.99	0.0014	0.99	-0.17	0.13	-0.13	0.25	-0.22	0.045	-0.19	0.086	0.11	0.32	0.18	0.098	0.022	0.84	-0.14	0.19	0.035	0.75
ABRAXAS2	blue	0.032	0.77	-0.032	0.77	-0.2	0.073	0.054	0.63	-0.082	0.46	0.41	0.00014	0.26	0.017	-0.17	0.13	0.05	0.65	-0.29	0.0085	-0.16	0.14
NRDE2	blue	-0.085	0.45	0.085	0.45	-0.13	0.23	0.29	0.0069	0.18	0.094	0.041	0.71	0.053	0.63	-0.086	0.44	-0.026	0.82	-0.18	0.099	-0.1	0.37
NAV2	blue	-0.22	0.045	0.22	0.045	-0.055	0.62	0.28	0.012	0.027	0.81	0.29	0.0073	-0.069	0.54	-0.29	0.0085	-0.02	0.86	-0.32	0.0032	-0.16	0.15
ZNF106	blue	0.19	0.089	-0.19	0.089	0.12	0.27	-0.045	0.69	0.14	0.21	0.064	0.57	0.078	0.48	0.055	0.62	0.11	0.32	0.39	0.00028	0.14	0.22
LHFPL6	blue	0.073	0.51	-0.073	0.51	0.54	1.5e-07	0.08	0.47	0.31	0.0045	-0.19	0.083	-0.26	0.019	0.039	0.72	0.11	0.34	0.51	7.4e-07	0.23	0.037
RPL19	blue	0.2	0.069	-0.2	0.069	-0.32	0.003	-0.16	0.14	-0.26	0.019	0.07	0.53	0.19	0.079	0.099	0.37	0.028	0.8	-0.14	0.21	0.025	0.82
STRADB	blue	0.16	0.15	-0.16	0.15	-0.079	0.48	0.089	0.42	0.11	0.32	0.12	0.28	0.18	0.11	-0.14	0.21	-0.16	0.14	0.19	0.089	0.046	0.68
PABPC4	blue	-0.039	0.73	0.039	0.73	-0.08	0.47	-0.039	0.73	-0.12	0.27	-0.03	0.79	-0.095	0.39	-0.047	0.67	-0.039	0.73	0.15	0.17	-0.1	0.35
VIT	blue	0.5	1.8e-06	-0.5	1.8e-06	0.088	0.43	-0.26	0.019	-0.09	0.42	-0.053	0.64	0.14	0.21	0.061	0.59	0.42	7.5e-05	0.49	2.2e-06	0.41	0.00012
UBOX5	blue	0.1	0.36	-0.1	0.36	-0.005	0.96	-0.0029	0.98	0.042	0.7	0.087	0.43	0.059	0.6	-0.021	0.85	-0.014	0.9	0.16	0.14	-0.027	0.81
SLC23A2	blue	0.027	0.81	-0.027	0.81	0.19	0.091	0.04	0.72	0.053	0.63	-0.13	0.25	-0.18	0.11	-0.046	0.68	0.17	0.12	0.13	0.25	-0.044	0.69
EDARADD	blue	-0.038	0.73	0.038	0.73	-0.2	0.073	0.32	0.0037	0.14	0.21	0.17	0.14	0.089	0.42	-0.33	0.0025	0.029	0.8	-0.28	0.01	-0.16	0.15
PIAS2	blue	0.11	0.31	-0.11	0.31	0.06	0.59	-0.11	0.32	-0.096	0.39	-0.051	0.65	0.0072	0.95	0.062	0.58	0.14	0.22	0.29	0.0071	0.18	0.1
ANKRD33B	blue	0.02	0.86	-0.02	0.86	0.12	0.29	0.0005	1	-0.032	0.77	-0.14	0.21	-0.24	0.03	-0.21	0.054	-0.16	0.16	0.32	0.0034	-0.073	0.51
SOD3	blue	0.36	0.00094	-0.36	0.00094	0.41	0.00014	-0.072	0.51	0.15	0.19	-0.17	0.12	-0.027	0.81	0.077	0.49	0.28	0.01	0.63	1.7e-10	0.52	4.4e-07
IL11RA	blue	0.15	0.18	-0.15	0.18	0.12	0.26	0.11	0.31	0.24	0.029	-0.14	0.2	-0.013	0.91	0.027	0.81	0.16	0.16	0.29	0.0069	0.2	0.068
SFMBT1	blue	0.17	0.13	-0.17	0.13	0.019	0.86	0.13	0.23	0.074	0.51	-0.011	0.92	0.074	0.51	-0.04	0.72	0.29	0.0076	0.23	0.032	0.23	0.035
ARHGEF18	blue	-0.1	0.36	0.1	0.36	-0.054	0.63	0.15	0.18	0.023	0.84	0.32	0.0035	-0.014	0.9	-0.3	0.0051	-0.065	0.56	-0.21	0.055	-0.26	0.018
DHRS7C	blue	0.34	0.0015	-0.34	0.0015	0.15	0.17	-0.13	0.26	-0.019	0.86	-0.2	0.077	0.021	0.85	0.11	0.34	0.042	0.71	0.84	3.7e-23	0.35	0.0013
MYEOV	blue	0.15	0.19	-0.15	0.19	-0.28	0.011	-0.12	0.27	-0.18	0.11	0.023	0.84	0.21	0.063	0.025	0.82	0.25	0.024	-0.17	0.13	-0.0049	0.96
PLCG2	blue	-0.0055	0.96	0.0055	0.96	0.23	0.039	-0.039	0.72	0.071	0.52	-0.0064	0.95	-0.072	0.52	0.041	0.72	-0.0025	0.98	0.25	0.025	0.12	0.27
REEP3	blue	0.03	0.79	-0.03	0.79	-0.15	0.17	0.038	0.74	-0.13	0.25	0.1	0.36	-0.019	0.86	-0.15	0.17	0.024	0.83	-0.16	0.16	0.0063	0.96
PTPRS	blue	0.2	0.072	-0.2	0.072	0.23	0.037	-0.31	0.0047	-0.068	0.54	-0.14	0.21	0.2	0.068	0.37	0.00061	0.12	0.29	0.37	0.00048	0.26	0.02
UTP14C	blue	0.093	0.4	-0.093	0.4	0.18	0.096	-0.052	0.64	0.18	0.094	-0.13	0.26	-0.023	0.84	-0.09	0.42	-0.073	0.51	0.29	0.0074	0.15	0.18
STRIT1	blue	0.5	2e-06	-0.5	2e-06	0.057	0.61	-0.2	0.072	-0.043	0.7	-0.14	0.19	0.15	0.18	0.12	0.28	0.048	0.67	0.84	9.2e-23	0.38	0.00041
HNRNPH2	blue	-0.0019	0.99	0.0019	0.99	0.16	0.15	0.035	0.75	0.13	0.23	0.11	0.32	-0.11	0.34	-0.14	0.21	-0.078	0.49	0.14	0.22	-0.052	0.64
GNPTG	blue	0.071	0.52	-0.071	0.52	-0.089	0.42	-0.046	0.68	0.016	0.88	0.078	0.49	0.15	0.18	0.097	0.39	0.2	0.075	-0.14	0.2	0.033	0.76
GNB2	blue	-0.072	0.52	0.072	0.52	-0.2	0.071	0.023	0.83	-0.14	0.22	0.17	0.12	0.058	0.6	-0.042	0.71	-0.1	0.37	-0.19	0.092	-0.18	0.094
HSBP1L1	blue	0.079	0.48	-0.079	0.48	-0.33	0.0024	0.15	0.17	-0.031	0.78	0.1	0.35	0.11	0.31	-0.13	0.26	0.067	0.55	-0.24	0.029	-0.03	0.79
KANK3	blue	0.3	0.0056	-0.3	0.0056	0.14	0.19	-0.052	0.64	0.17	0.13	-0.11	0.31	0.08	0.47	0.086	0.44	0.11	0.34	0.61	1e-09	0.28	0.0098
BHLHE40	blue	0.11	0.3	-0.11	0.3	-0.0086	0.94	-0.11	0.32	-0.086	0.44	0.099	0.37	0.21	0.059	-0.054	0.63	-0.079	0.48	0.12	0.26	0.017	0.88
ZNF408	blue	-0.029	0.8	0.029	0.8	-0.25	0.02	0.021	0.85	-0.14	0.22	0.33	0.0021	0.16	0.16	-0.12	0.3	0.067	0.55	-0.23	0.041	-0.2	0.064
HIGD2A	blue	0.12	0.27	-0.12	0.27	-0.22	0.042	0.0048	0.97	-0.065	0.56	0.071	0.53	0.15	0.16	0.0051	0.96	0.076	0.49	0.091	0.41	0.086	0.44
THEM4	blue	0.084	0.45	-0.084	0.45	-0.084	0.45	-0.11	0.3	-0.15	0.17	-0.21	0.053	-0.098	0.38	0.13	0.22	0.2	0.063	0.22	0.043	0.064	0.56
BFAR	blue	0.1	0.36	-0.1	0.36	0.0022	0.98	-0.11	0.33	-0.12	0.28	-0.16	0.15	-0.092	0.41	0.057	0.61	-0.0054	0.96	0.22	0.048	-0.029	0.79
PRKACB	blue	0.12	0.3	-0.12	0.3	0.22	0.05	0.27	0.014	0.3	0.0053	-0.084	0.45	-0.04	0.72	-0.21	0.06	0.0095	0.93	0.35	0.001	0.2	0.072
SUN1	blue	-0.044	0.69	0.044	0.69	0.11	0.32	-0.23	0.036	-0.23	0.037	-0.045	0.69	-0.075	0.5	0.05	0.66	-0.047	0.67	0.27	0.012	-0.051	0.65
FAM185A	blue	-0.077	0.49	0.077	0.49	0.18	0.1	0.033	0.77	0.021	0.85	-0.09	0.42	-0.11	0.31	-0.027	0.81	0.017	0.88	0.052	0.64	-0.016	0.89
CACNG1	blue	0.16	0.15	-0.16	0.15	0.31	0.0037	-0.1	0.36	0.0064	0.95	-0.25	0.024	-0.13	0.24	0.034	0.76	-0.024	0.83	0.77	1.4e-17	0.2	0.077
ANKRD27	blue	-0.13	0.24	0.13	0.24	-0.16	0.15	-0.011	0.92	-0.021	0.85	0.05	0.65	-0.053	0.64	0.031	0.78	-0.17	0.12	-0.23	0.041	-0.21	0.052
BAIAP2L1	blue	-0.15	0.17	0.15	0.17	0.0026	0.98	0.1	0.36	0.0022	0.98	0.16	0.16	-0.09	0.42	-0.014	0.9	0.024	0.83	-0.17	0.11	-0.14	0.2
C3	blue	0.19	0.086	-0.19	0.086	0.46	1.2e-05	0.022	0.84	0.37	0.00051	-0.3	0.0055	-0.079	0.48	0.18	0.098	0.29	0.0073	0.42	8.3e-05	0.52	5.5e-07
PLEKHM3	blue	0.0066	0.95	-0.0066	0.95	0.23	0.039	-0.072	0.52	0.088	0.43	0.037	0.74	0.019	0.87	0.059	0.6	-0.034	0.76	0.23	0.037	0.094	0.4
SRSF9	blue	-0.16	0.14	0.16	0.14	-0.19	0.085	0.02	0.86	-0.12	0.29	0.28	0.01	0.081	0.46	-0.065	0.56	-0.033	0.77	-0.35	0.0012	-0.25	0.025
IGSF11	blue	-0.12	0.27	0.12	0.27	0.025	0.82	-0.26	0.019	-0.17	0.12	-0.099	0.38	0.14	0.21	0.51	9.4e-07	-0.016	0.88	0.13	0.23	-0.0097	0.93
CENPP	blue	-0.085	0.44	0.085	0.44	-0.21	0.06	0.054	0.63	0.037	0.74	0.25	0.023	0.25	0.021	-0.021	0.85	-0.14	0.2	-0.25	0.022	-0.24	0.028
PLA2G2A	blue	0.61	7.6e-10	-0.61	7.6e-10	0.22	0.043	-0.17	0.13	0.15	0.16	-0.15	0.17	0.27	0.015	0.18	0.099	0.36	0.00097	0.73	5.1e-15	0.63	1.3e-10
EIF1B	blue	0.19	0.078	-0.19	0.078	-0.089	0.42	-0.19	0.079	-0.16	0.16	-0.046	0.68	0.12	0.26	0.08	0.47	-0.0021	0.99	0.34	0.0018	0.044	0.69
CPXM2	blue	0.25	0.025	-0.25	0.025	0.59	4e-09	-0.2	0.071	0.27	0.014	-0.09	0.42	0.11	0.32	0.33	0.0027	0.19	0.087	0.57	1.4e-08	0.44	2.8e-05
ARHGAP6	blue	0.38	0.00047	-0.38	0.00047	0.27	0.012	-0.084	0.45	0.14	0.22	-0.24	0.026	0.031	0.78	0.099	0.37	0.14	0.22	0.64	8.6e-11	0.39	0.00028
SMARCA4	blue	0.038	0.73	-0.038	0.73	-0.27	0.015	0.023	0.84	-0.035	0.76	0.15	0.19	0.12	0.29	-0.027	0.81	0.11	0.31	-0.17	0.13	-0.11	0.33
ABCB8	blue	-0.12	0.28	0.12	0.28	-0.048	0.66	0.063	0.57	0.017	0.88	0.19	0.092	-0.053	0.63	-0.24	0.031	-0.027	0.81	-0.22	0.046	-0.21	0.063
KCNA7	blue	0.28	0.012	-0.28	0.012	0.22	0.05	-0.1	0.35	0.019	0.87	-0.24	0.032	-0.012	0.91	0.14	0.21	0.0029	0.98	0.87	1.6e-26	0.3	0.0057
ATOH8	blue	0.46	1.5e-05	-0.46	1.5e-05	0.18	0.1	-0.12	0.27	0.05	0.65	-0.094	0.4	0.086	0.44	0.066	0.55	0.23	0.035	0.75	4.8e-16	0.4	0.00019
EXOC5	blue	-0.23	0.035	0.23	0.035	-0.0057	0.96	0.2	0.066	0.062	0.58	0.17	0.12	-0.092	0.41	-0.23	0.034	-0.21	0.063	-0.2	0.071	-0.18	0.11
DYRK2	blue	-0.29	0.0076	0.29	0.0076	0.11	0.33	0.068	0.54	0.098	0.38	0.098	0.38	0.15	0.17	0.13	0.24	-0.17	0.12	-0.13	0.22	-0.12	0.28
ZDHHC12	blue	-0.19	0.083	0.19	0.083	-0.19	0.082	0.26	0.017	0.15	0.18	0.036	0.75	-0.11	0.31	-0.2	0.071	-0.18	0.11	-0.36	0.00084	-0.34	0.0019
PGLS	blue	0.02	0.86	-0.02	0.86	-0.037	0.74	-0.095	0.39	-0.085	0.45	0.12	0.27	0.16	0.14	0.066	0.55	0.15	0.18	-0.14	0.21	0.083	0.46
TTC33	blue	0.028	0.8	-0.028	0.8	0.21	0.057	-0.16	0.15	-0.059	0.6	-0.27	0.014	-0.08	0.47	0.11	0.32	-0.066	0.56	0.33	0.0022	0.1	0.35
BVES	blue	0.051	0.65	-0.051	0.65	0.3	0.0053	-0.057	0.61	0.031	0.78	-0.32	0.0029	-0.23	0.038	0.072	0.52	-0.0084	0.94	0.6	2.6e-09	0.12	0.3
RGL1	blue	-0.074	0.5	0.074	0.5	0.41	0.00014	0.21	0.057	0.36	0.00099	-0.23	0.041	-0.18	0.095	-0.058	0.6	0.12	0.28	0.3	0.0068	0.23	0.04
ZNF449	blue	-0.0038	0.97	0.0038	0.97	0.062	0.58	-0.082	0.46	-0.16	0.14	0.038	0.73	-0.036	0.74	0.026	0.81	-0.0037	0.97	0.19	0.093	-0.053	0.63
ZNF440	blue	-0.073	0.51	0.073	0.51	-0.096	0.39	0.11	0.31	0.037	0.74	0.21	0.059	0.094	0.4	-0.061	0.59	-0.066	0.56	-0.2	0.076	-0.19	0.08
TMEM52	blue	0.37	0.0005	-0.37	0.0005	0.1	0.36	-0.32	0.0033	-0.14	0.21	-0.33	0.0023	0.074	0.51	0.36	0.0007	0.098	0.38	0.72	1.4e-14	0.4	0.00017
SNCAIP	blue	-0.047	0.67	0.047	0.67	0.13	0.23	0.12	0.29	0.12	0.27	-0.11	0.34	-0.024	0.83	0.11	0.32	0.23	0.034	0.16	0.16	0.087	0.43
ZNF717	blue	0.27	0.012	-0.27	0.012	0.072	0.52	-0.25	0.024	-0.078	0.49	-0.34	0.0019	0.17	0.12	0.33	0.0025	0.24	0.026	0.51	1.1e-06	0.44	3.7e-05
NIT2	blue	0.17	0.12	-0.17	0.12	-0.081	0.46	0.0013	0.99	0.045	0.69	0.11	0.34	0.097	0.38	-0.083	0.46	0.018	0.87	0.16	0.16	0.057	0.61
RASA1	blue	0.16	0.15	-0.16	0.15	0.098	0.38	0.14	0.2	0.094	0.4	0.04	0.72	0.014	0.9	-0.2	0.065	0.081	0.47	0.23	0.04	0.14	0.21
TRIM5	blue	0.062	0.58	-0.062	0.58	-0.059	0.59	0.29	0.0087	0.14	0.21	-0.092	0.41	-0.14	0.19	-0.3	0.0064	-0.12	0.27	0.17	0.13	-0.069	0.53
ALDOA	blue	0.059	0.6	-0.059	0.6	-0.12	0.3	-0.21	0.061	-0.26	0.019	-0.096	0.39	-0.02	0.86	0.13	0.25	0.098	0.38	0.19	0.084	0.0069	0.95
GLCCI1	blue	0.15	0.17	-0.15	0.17	0.18	0.11	0.21	0.056	0.24	0.026	-0.13	0.25	0.03	0.79	-0.042	0.71	0.093	0.4	0.32	0.0033	0.23	0.035
PRR3	blue	-0.0062	0.96	0.0062	0.96	0.058	0.6	-0.078	0.49	-0.0053	0.96	-0.22	0.044	-0.0056	0.96	0.31	0.0045	0.11	0.3	0.25	0.02	0.053	0.63
PMPCA	blue	0.092	0.41	-0.092	0.41	-0.031	0.78	0.017	0.88	0.034	0.76	0.0086	0.94	-0.034	0.76	-0.057	0.61	0.071	0.52	0.16	0.14	-0.012	0.91
H3-3A	blue	-0.045	0.69	0.045	0.69	-0.16	0.14	-0.041	0.71	-0.17	0.12	0.25	0.02	0.25	0.02	0.017	0.88	0.0093	0.93	-0.14	0.19	-0.03	0.79
ECSIT	blue	0.19	0.089	-0.19	0.089	-0.054	0.63	-0.26	0.018	-0.11	0.32	-0.27	0.012	0.088	0.43	0.31	0.004	0.19	0.086	0.3	0.0067	0.2	0.07
NAF1	blue	0.0063	0.96	-0.0063	0.96	-0.025	0.82	-0.06	0.59	-0.092	0.41	-0.032	0.77	-0.052	0.64	-0.021	0.85	-0.059	0.6	0.24	0.029	-0.098	0.38
BMERB1	blue	0.16	0.14	-0.16	0.14	0.48	4.1e-06	-0.15	0.17	0.13	0.25	-0.095	0.39	-0.015	0.89	0.15	0.17	0.034	0.76	0.54	1.5e-07	0.28	0.011
TNIP3	blue	-0.18	0.11	0.18	0.11	-0.067	0.55	0.25	0.024	0.14	0.19	0.14	0.2	-0.063	0.57	-0.21	0.062	-0.056	0.61	-0.2	0.065	-0.19	0.091
VPS25	blue	0.025	0.82	-0.025	0.82	-0.26	0.019	-0.2	0.065	-0.27	0.013	0.27	0.013	0.26	0.019	-0.056	0.61	-0.12	0.28	-0.2	0.066	-0.094	0.4
TXN	blue	0.039	0.73	-0.039	0.73	-0.42	6.5e-05	0.057	0.61	-0.18	0.11	0.31	0.0042	0.22	0.048	-0.2	0.071	-0.21	0.058	-0.35	0.0012	-0.32	0.0028
SLC25A25	blue	0.31	0.0045	-0.31	0.0045	-0.27	0.012	-0.19	0.087	-0.11	0.3	0.23	0.039	0.39	0.0003	0.19	0.088	0.13	0.26	0.26	0.016	0.12	0.27
KDELR1	blue	-0.2	0.068	0.2	0.068	0.11	0.33	0.085	0.44	0.096	0.39	-0.041	0.71	-0.13	0.25	-0.01	0.93	0.071	0.52	-0.16	0.15	-0.13	0.24
PATJ	blue	-0.053	0.63	0.053	0.63	-0.19	0.08	0.03	0.79	-0.13	0.26	0.31	0.0049	0.18	0.11	-0.17	0.12	0.059	0.6	-0.2	0.066	-0.14	0.21
INHBB	blue	0.11	0.33	-0.11	0.33	0.51	9.2e-07	-0.12	0.3	0.15	0.19	-0.32	0.0035	-0.15	0.18	0.3	0.0058	0.26	0.02	0.46	1e-05	0.34	0.0015
THEM6	blue	0.034	0.76	-0.034	0.76	-0.21	0.053	-0.086	0.44	-0.18	0.11	0.21	0.056	0.19	0.088	0.016	0.89	0.026	0.82	-0.28	0.011	-0.047	0.68
HSPB11	blue	-0.2	0.067	0.2	0.067	-0.27	0.015	0.22	0.044	0.035	0.76	0.11	0.32	-0.053	0.63	-0.23	0.04	-0.17	0.13	-0.32	0.0035	-0.32	0.0036
TNFAIP8	blue	0.064	0.56	-0.064	0.56	-0.16	0.15	0.18	0.11	0.043	0.7	0.23	0.035	0.14	0.19	-0.26	0.019	0.049	0.66	-0.17	0.13	-0.07	0.53
SEC61G	blue	-0.16	0.15	0.16	0.15	-0.29	0.0085	-0.13	0.25	-0.3	0.0062	0.13	0.25	-0.0013	0.99	0.036	0.75	-0.21	0.057	-0.33	0.0021	-0.31	0.0041
CHM	blue	0.037	0.74	-0.037	0.74	0.14	0.21	-0.17	0.12	-0.091	0.41	0.065	0.56	0.049	0.66	0.026	0.81	0.0043	0.97	0.22	0.042	-0.064	0.57
ABCD4	blue	0.11	0.31	-0.11	0.31	0.11	0.33	-0.094	0.4	0.037	0.74	-0.16	0.14	-0.05	0.65	0.13	0.24	0.07	0.53	0.18	0.1	0.043	0.7
DGAT1	blue	-0.12	0.26	0.12	0.26	-0.16	0.15	-0.032	0.77	-0.092	0.41	0.062	0.58	0.0023	0.98	-0.066	0.56	0.044	0.69	-0.25	0.025	-0.22	0.042
AK3	blue	0.085	0.44	-0.085	0.44	0.061	0.58	0.21	0.056	0.095	0.39	0.15	0.18	0.12	0.29	-0.21	0.058	0.044	0.69	0.14	0.2	0.084	0.45
FAM50B	blue	0.13	0.23	-0.13	0.23	-0.11	0.33	0.047	0.67	-0.079	0.48	-0.077	0.49	-0.0091	0.94	-0.089	0.42	0.012	0.92	0.072	0.52	0.01	0.93
ANK1	blue	0.081	0.47	-0.081	0.47	0.1	0.35	-0.033	0.76	0.00058	1	-0.19	0.079	-0.24	0.031	-0.021	0.85	-0.1	0.37	0.51	1e-06	0.035	0.75
BBS4	blue	-0.061	0.58	0.061	0.58	0.0051	0.96	0.0098	0.93	-0.044	0.69	-0.044	0.69	-0.12	0.27	-0.096	0.39	0.034	0.76	-0.092	0.41	-0.084	0.45
EPC2	blue	-0.15	0.19	0.15	0.19	0.0088	0.94	-0.095	0.39	-0.071	0.52	0.062	0.58	0.083	0.45	0.18	0.1	-0.0045	0.97	-0.087	0.43	-0.097	0.38
UFM1	blue	0.063	0.57	-0.063	0.57	-0.25	0.025	0.0001	1	-0.17	0.13	0.054	0.63	0.11	0.32	-0.016	0.88	0.079	0.48	-0.12	0.26	-0.098	0.38
NDUFB7	blue	0.17	0.12	-0.17	0.12	-0.12	0.27	-0.091	0.42	-0.081	0.47	-0.093	0.4	0.098	0.38	0.18	0.1	0.24	0.03	0.18	0.11	0.05	0.65
SRL	blue	0.33	0.0022	-0.33	0.0022	0.12	0.28	-0.27	0.014	-0.12	0.28	-0.21	0.056	0.051	0.65	0.15	0.18	0.032	0.77	0.78	5e-18	0.27	0.012
UEVLD	blue	0.12	0.29	-0.12	0.29	0.14	0.21	-0.068	0.54	0.024	0.83	-0.008	0.94	0.04	0.72	0.07	0.53	0.076	0.49	0.34	0.0015	0.2	0.074
ETHE1	blue	0.059	0.59	-0.059	0.59	-0.25	0.024	0.1	0.35	-0.043	0.7	0.28	0.011	0.15	0.18	-0.24	0.03	-0.083	0.46	-0.24	0.031	-0.15	0.17
KCNS3	blue	-0.13	0.24	0.13	0.24	0.27	0.015	-0.18	0.11	-0.054	0.63	-0.25	0.025	-0.039	0.72	0.33	0.0022	0.023	0.84	0.25	0.024	0.048	0.66
SLC41A1	blue	0.11	0.34	-0.11	0.34	0.13	0.23	-0.16	0.16	-0.12	0.27	-0.22	0.044	-0.2	0.073	0.077	0.49	0.2	0.067	0.36	0.00069	0.059	0.6
KCNQ4	blue	0.52	5.4e-07	-0.52	5.4e-07	0.074	0.51	-0.33	0.0022	-0.16	0.14	-0.16	0.14	0.19	0.079	0.27	0.012	0.18	0.11	0.7	1.7e-13	0.49	2.3e-06
TPM2	blue	0.24	0.026	-0.24	0.026	0.29	0.0075	-0.11	0.3	0.016	0.89	-0.32	0.0028	-0.17	0.13	0.084	0.45	0.088	0.43	0.69	5.8e-13	0.22	0.05
RBM24	blue	0.24	0.027	-0.24	0.027	0.41	0.00011	-0.17	0.12	0.08	0.47	-0.19	0.087	-0.095	0.39	0.053	0.63	0.072	0.52	0.78	5.9e-18	0.25	0.022
RPL34	blue	0.29	0.0082	-0.29	0.0082	-0.22	0.046	-0.23	0.037	-0.17	0.13	0.0027	0.98	0.25	0.025	0.23	0.034	0.08	0.47	0.22	0.043	0.16	0.16
WDR83	blue	-0.026	0.82	0.026	0.82	0.099	0.37	-0.057	0.61	0.0041	0.97	-0.25	0.023	-0.11	0.32	0.24	0.031	0.02	0.86	0.19	0.089	0.014	0.9
RBKS	blue	0.48	3.5e-06	-0.48	3.5e-06	-0.2	0.072	-0.035	0.75	0.015	0.89	0.23	0.036	0.39	0.00032	-0.091	0.42	0.19	0.088	0.25	0.025	0.25	0.02
HSPB2	blue	0.3	0.0053	-0.3	0.0053	0.17	0.12	-0.29	0.0084	-0.11	0.31	-0.28	0.011	0.028	0.8	0.23	0.035	0.052	0.64	0.79	5.2e-19	0.35	0.0013
SAFB	blue	0.047	0.67	-0.047	0.67	-0.021	0.85	-0.12	0.29	-0.13	0.23	-0.17	0.13	0.01	0.93	0.18	0.1	0.01	0.93	0.26	0.016	0.023	0.83
PLCL2	blue	0.14	0.22	-0.14	0.22	0.4	0.0002	0.17	0.13	0.46	1e-05	-0.1	0.36	0.015	0.9	-0.0063	0.95	0.071	0.53	0.47	8.4e-06	0.35	0.0011
TTC32	blue	0.17	0.13	-0.17	0.13	-0.011	0.92	-0.33	0.0023	-0.3	0.0058	-0.17	0.12	0.099	0.37	0.3	0.0062	0.15	0.17	0.35	0.0011	0.19	0.083
CDH4	blue	0.014	0.9	-0.014	0.9	0.19	0.086	-0.21	0.06	-0.074	0.51	-0.17	0.13	-0.11	0.32	0.3	0.0065	-0.011	0.92	0.22	0.042	0.14	0.21
SH2B2	blue	0.063	0.57	-0.063	0.57	0.092	0.41	-0.0081	0.94	0.096	0.39	-0.22	0.041	-0.16	0.16	0.12	0.28	-0.047	0.67	0.4	0.00021	0.13	0.22
BCL6	blue	0.14	0.2	-0.14	0.2	0.2	0.071	-0.26	0.018	-0.022	0.84	0.11	0.32	0.24	0.031	0.25	0.02	0.19	0.079	0.3	0.0058	0.2	0.065
OSGIN1	blue	-0.0077	0.95	0.0077	0.95	-0.31	0.0039	-0.37	0.0006	-0.32	0.0028	0.074	0.51	0.36	0.00093	0.41	0.00013	-0.074	0.5	-0.19	0.084	-0.019	0.87
NBPF1	blue	-0.12	0.27	0.12	0.27	0.13	0.25	-0.077	0.49	-0.11	0.34	-0.19	0.08	-0.14	0.22	0.049	0.66	-0.054	0.63	0.17	0.12	-0.0024	0.98
THAP1	blue	0.095	0.39	-0.095	0.39	-0.037	0.74	-0.11	0.32	-0.055	0.62	-0.14	0.19	0.021	0.85	0.05	0.65	-0.078	0.48	0.24	0.028	0.011	0.92
SCCPDH	blue	0.11	0.31	-0.11	0.31	0.39	0.00029	-0.081	0.47	0.13	0.24	-0.35	0.0013	-0.11	0.33	0.27	0.015	0.11	0.32	0.36	0.00096	0.27	0.013
DNAJC17	blue	-0.028	0.8	0.028	0.8	-0.1	0.35	0.055	0.62	-0.029	0.8	0.045	0.69	0.029	0.79	-0.054	0.63	0.0068	0.95	-0.059	0.59	-0.0043	0.97
PSMD9	blue	-0.08	0.47	0.08	0.47	-0.16	0.14	0.11	0.31	0.021	0.85	0.17	0.12	-0.041	0.71	-0.23	0.04	-0.037	0.74	-0.18	0.11	-0.16	0.14
NOP16	blue	-0.15	0.17	0.15	0.17	-0.38	0.00048	-0.017	0.88	-0.18	0.095	0.089	0.42	0.018	0.87	-0.095	0.39	-0.1	0.36	-0.36	0.00076	-0.35	0.0012
GOSR2	blue	-0.01	0.92	0.01	0.92	-0.086	0.44	-0.036	0.74	-0.024	0.83	-0.11	0.31	-0.03	0.79	0.1	0.35	0.12	0.28	-0.089	0.42	-0.04	0.72
MRPL54	blue	0.17	0.13	-0.17	0.13	-0.077	0.49	-0.073	0.51	-0.024	0.83	0.097	0.38	0.17	0.12	0.033	0.77	0.0055	0.96	0.16	0.16	0.14	0.22
ENKUR	blue	-0.12	0.29	0.12	0.29	0.0078	0.94	0.061	0.58	0.037	0.74	0.31	0.0041	-0.059	0.6	-0.15	0.19	-0.13	0.23	-0.19	0.092	-0.15	0.18
TEAD1	blue	-0.027	0.81	0.027	0.81	0.23	0.037	0.0071	0.95	0.052	0.64	-0.065	0.56	-0.17	0.13	-0.12	0.28	-0.09	0.42	0.41	0.00012	-0.055	0.62
SLC37A4	blue	0.16	0.16	-0.16	0.16	-0.015	0.89	-0.16	0.15	-0.042	0.7	-0.22	0.044	0.0094	0.93	0.18	0.1	0.068	0.54	0.37	0.00055	0.22	0.044
CXADR	blue	0.14	0.22	-0.14	0.22	-0.078	0.48	-0.06	0.59	-0.18	0.11	0.35	0.0011	0.21	0.055	-0.13	0.23	0.15	0.17	-0.23	0.033	0.0084	0.94
AAR2	blue	-0.15	0.16	0.15	0.16	0.31	0.0044	-0.03	0.79	0.085	0.44	-0.067	0.55	-0.12	0.26	0.066	0.55	-0.019	0.86	0.087	0.44	-0.033	0.77
RPP25	blue	0.0073	0.95	-0.0073	0.95	-0.14	0.22	-0.28	0.0092	-0.24	0.026	0.06	0.59	0.27	0.013	0.34	0.0016	-0.1	0.35	-0.13	0.23	-0.06	0.59
TMEM120A	blue	0.17	0.13	-0.17	0.13	0.05	0.65	-0.22	0.046	-0.13	0.25	0.083	0.45	0.2	0.063	0.087	0.44	0.026	0.82	0.28	0.0094	0.11	0.31
DEDD2	blue	-0.21	0.056	0.21	0.056	-0.13	0.22	0.047	0.67	-0.056	0.61	0.011	0.92	-0.048	0.67	0.078	0.48	-0.2	0.065	-0.28	0.0098	-0.28	0.011
DENND2A	blue	0.087	0.43	-0.087	0.43	0.29	0.0071	0.027	0.81	0.11	0.32	-0.23	0.033	-0.26	0.016	-0.044	0.69	0.053	0.63	0.5	1.5e-06	0.075	0.5
ACAP3	blue	0.058	0.6	-0.058	0.6	-0.27	0.012	-0.14	0.21	-0.26	0.02	0.11	0.32	0.26	0.017	0.15	0.17	0.039	0.73	-0.12	0.26	-0.063	0.57
CSNK2A2	blue	-0.061	0.59	0.061	0.59	-0.16	0.15	-0.04	0.72	-0.18	0.1	0.19	0.094	-0.024	0.83	-0.1	0.36	0.14	0.2	-0.18	0.1	-0.19	0.089
RHBDD2	blue	-0.15	0.17	0.15	0.17	0.062	0.58	0.021	0.85	0.024	0.83	-0.025	0.82	-0.084	0.45	0.03	0.79	0.0045	0.97	-0.13	0.25	-0.087	0.44
TARS3	blue	-0.12	0.28	0.12	0.28	0.26	0.02	0.13	0.24	0.14	0.2	-0.22	0.041	-0.31	0.0047	-0.044	0.69	0.0097	0.93	0.3	0.0055	0.002	0.99
SYNPO2L	blue	0.36	0.00089	-0.36	0.00089	0.11	0.3	-0.15	0.17	-0.045	0.69	-0.048	0.66	0.12	0.27	-0.0035	0.98	-0.023	0.83	0.8	1e-19	0.25	0.023
DIS3L	blue	0.14	0.2	-0.14	0.2	0.077	0.49	-0.034	0.76	0.0032	0.98	-0.012	0.91	0.068	0.54	-0.021	0.85	0.036	0.75	0.32	0.0031	0.15	0.18
AEN	blue	0.017	0.88	-0.017	0.88	0.14	0.22	-0.016	0.88	0.062	0.58	0.058	0.6	-0.13	0.24	-0.088	0.43	-0.14	0.21	0.18	0.1	-0.14	0.21
VAMP5	blue	-0.021	0.85	0.021	0.85	0.25	0.022	0.026	0.81	0.15	0.18	-0.17	0.13	-0.14	0.2	0.02	0.86	-0.0091	0.93	0.28	0.011	0.07	0.53
NRAP	blue	0.36	0.00073	-0.36	0.00073	0.18	0.11	-0.23	0.04	-0.029	0.79	-0.15	0.17	0.049	0.66	0.093	0.4	0.029	0.79	0.81	2.8e-20	0.26	0.019
MAP3K7CL	blue	0.075	0.5	-0.075	0.5	0.29	0.008	0.037	0.74	0.085	0.45	-0.28	0.011	-0.25	0.023	-0.09	0.42	-0.012	0.91	0.6	2e-09	0.078	0.48
GJA4	blue	0.25	0.024	-0.25	0.024	0.33	0.0025	0.029	0.79	0.29	0.0078	-0.15	0.17	-0.058	0.6	0.088	0.43	0.061	0.58	0.6	2.3e-09	0.29	0.0089
ZNF74	blue	0.03	0.79	-0.03	0.79	-0.084	0.45	-0.016	0.89	0.0049	0.96	0.0018	0.99	0.04	0.72	0.098	0.38	0.014	0.9	-0.12	0.28	0.0048	0.97
ASF1A	blue	0.06	0.59	-0.06	0.59	-0.14	0.21	-0.09	0.42	-0.16	0.15	-0.026	0.81	0.17	0.11	0.16	0.14	-0.0076	0.95	-0.042	0.7	-0.034	0.76
RGS5	blue	0.19	0.089	-0.19	0.089	0.42	7e-05	-0.13	0.23	0.14	0.19	-0.11	0.31	0.022	0.84	0.14	0.21	0.23	0.037	0.57	2.1e-08	0.34	0.0019
SAT1	blue	-0.02	0.86	0.02	0.86	0.05	0.65	0.0049	0.96	0.064	0.57	-0.088	0.43	0.097	0.38	0.21	0.055	0.12	0.27	-0.098	0.38	0.063	0.57
ALPK2	blue	-0.037	0.74	0.037	0.74	0.47	6.3e-06	-0.026	0.82	0.11	0.34	-0.08	0.47	-0.24	0.03	-0.0091	0.94	-0.04	0.72	0.53	1.9e-07	0.059	0.6
F11R	blue	-0.26	0.02	0.26	0.02	-0.069	0.53	-0.2	0.068	-0.21	0.053	0.12	0.28	0.054	0.63	0.2	0.071	-0.11	0.33	-0.29	0.0081	-0.25	0.026
KIN	blue	-0.032	0.77	0.032	0.77	-0.19	0.079	-0.23	0.034	-0.3	0.0066	0.091	0.41	0.021	0.85	0.039	0.73	0.014	0.9	-0.17	0.12	-0.17	0.12
SRP54	blue	-0.049	0.66	0.049	0.66	0.075	0.5	-0.14	0.2	-0.12	0.28	-0.24	0.03	-0.059	0.59	0.11	0.34	-0.086	0.44	0.14	0.2	-0.13	0.25
CLYBL	blue	0.43	4.9e-05	-0.43	4.9e-05	-0.077	0.49	-0.26	0.019	-0.2	0.076	-0.086	0.44	0.29	0.0078	0.29	0.0089	0.22	0.042	0.46	9.6e-06	0.4	0.00021
MN1	blue	-0.26	0.019	0.26	0.019	0.36	0.00098	-0.012	0.91	0.041	0.71	0.042	0.71	-0.21	0.061	0.077	0.49	-0.03	0.79	0.24	0.029	-0.17	0.12
WDR7	blue	-0.023	0.84	0.023	0.84	0.12	0.28	0.16	0.14	0.15	0.18	0.21	0.061	0.1	0.37	-0.023	0.83	-0.038	0.74	0.18	0.11	0.02	0.86
C9orf78	blue	0.032	0.78	-0.032	0.78	-0.064	0.56	-0.0088	0.94	-0.056	0.61	0.15	0.17	0.027	0.81	-0.069	0.54	0.044	0.69	0.075	0.5	-0.075	0.5
SCN4A	blue	0.3	0.0056	-0.3	0.0056	0.33	0.0026	-0.16	0.15	0.044	0.7	-0.28	0.01	-0.05	0.66	0.15	0.16	0.076	0.5	0.93	7.7e-36	0.33	0.002
PRRG1	blue	0.065	0.56	-0.065	0.56	-0.055	0.62	0.09	0.42	0.021	0.85	-0.083	0.46	-0.015	0.9	-0.2	0.072	-0.02	0.86	0.16	0.14	-0.091	0.41
DGCR6L	blue	0.032	0.77	-0.032	0.77	0.039	0.72	-0.12	0.26	-0.026	0.81	0.019	0.86	0.0086	0.94	0.095	0.39	0.065	0.56	0.14	0.21	-0.055	0.62
APOBEC2	blue	0.36	0.00087	-0.36	0.00087	0.24	0.026	-0.16	0.15	0.026	0.82	-0.21	0.052	0.025	0.82	0.097	0.38	0.038	0.74	0.88	1.8e-28	0.31	0.0037
ZKSCAN4	blue	-0.15	0.18	0.15	0.18	0.059	0.6	0.12	0.3	-0.0075	0.95	-0.2	0.069	-0.14	0.2	0.0072	0.95	-0.15	0.18	0.18	0.11	-0.088	0.43
FYTTD1	blue	-0.042	0.7	0.042	0.7	0.19	0.083	-0.15	0.18	-0.15	0.18	0.12	0.27	-0.029	0.79	0.029	0.8	0.0096	0.93	0.2	0.065	-0.094	0.4
SPDYE3	blue	0.048	0.66	-0.048	0.66	0.066	0.55	-0.058	0.6	-0.06	0.59	-0.21	0.056	-0.062	0.58	0.17	0.13	0.036	0.74	0.31	0.0047	0.13	0.25
GPI	blue	0.063	0.57	-0.063	0.57	0.02	0.86	-0.25	0.025	-0.13	0.23	-0.2	0.073	0.076	0.49	0.32	0.003	0.0018	0.99	0.15	0.18	0.076	0.5
MRPS36	blue	0.24	0.032	-0.24	0.032	-0.2	0.069	0.063	0.57	-0.065	0.56	0.11	0.31	0.21	0.059	-0.013	0.9	0.11	0.32	0.25	0.021	0.047	0.68
IGSF9	blue	-0.26	0.017	0.26	0.017	-0.039	0.72	-0.15	0.16	-0.19	0.084	0.022	0.84	0.023	0.84	0.16	0.15	-0.099	0.37	-0.23	0.04	-0.18	0.1
ELMOD3	blue	0.11	0.34	-0.11	0.34	-0.094	0.4	-0.033	0.77	-0.16	0.14	-0.049	0.66	0.11	0.31	-0.066	0.55	0.055	0.62	0.12	0.3	0.096	0.39
BMPR2	blue	-0.18	0.097	0.18	0.097	0.05	0.65	0.22	0.045	0.14	0.21	0.044	0.69	-0.049	0.66	-0.038	0.73	-0.065	0.56	-0.089	0.43	-0.059	0.6
PTPDC1	blue	-0.14	0.2	0.14	0.2	-0.016	0.89	0.1	0.37	-0.083	0.46	-0.21	0.058	-0.18	0.11	-0.015	0.89	-0.045	0.68	0.25	0.024	-0.11	0.31
PAIP2B	blue	0.44	2.9e-05	-0.44	2.9e-05	-0.052	0.64	-0.39	0.00031	-0.2	0.069	0.21	0.052	0.42	6.4e-05	0.17	0.12	0.26	0.02	0.39	0.00026	0.39	0.00023
S100A6	blue	0.03	0.79	-0.03	0.79	-0.21	0.054	-0.029	0.8	-0.09	0.42	0.11	0.33	0.096	0.39	0.01	0.93	-0.011	0.92	-0.19	0.08	-0.033	0.77
PCDHB4	blue	0.21	0.051	-0.21	0.051	0.32	0.003	-0.23	0.035	-0.064	0.56	-0.18	0.11	0.025	0.83	0.16	0.15	0.081	0.47	0.45	2.2e-05	0.43	5.6e-05
CACNA1S	blue	0.29	0.0074	-0.29	0.0074	0.28	0.0094	-0.13	0.22	0.034	0.76	-0.24	0.031	-0.041	0.71	0.082	0.46	0.019	0.87	0.89	7.2e-30	0.3	0.0063
ALDH1B1	blue	0.05	0.66	-0.05	0.66	0.31	0.0046	-0.094	0.4	0.061	0.58	-0.4	0.00018	-0.26	0.019	0.17	0.12	-0.054	0.63	0.5	1.8e-06	0.15	0.19
DKK2	blue	0.0054	0.96	-0.0054	0.96	0.55	8.6e-08	0.00087	0.99	0.2	0.064	-0.13	0.23	-0.093	0.4	0.11	0.31	0.058	0.6	0.55	8.1e-08	0.13	0.23
SLC16A13	blue	-0.038	0.73	0.038	0.73	-0.1	0.35	0.057	0.61	0.00045	1	0.097	0.38	0.083	0.46	0.004	0.97	0.079	0.48	-0.15	0.17	-0.0057	0.96
NEURL1	blue	0.16	0.14	-0.16	0.14	-0.0043	0.97	-0.14	0.2	-0.12	0.3	-0.35	0.0014	-0.11	0.33	0.18	0.097	0.037	0.74	0.51	1.1e-06	0.16	0.14
GID4	blue	0.12	0.3	-0.12	0.3	0.15	0.18	-0.13	0.23	-0.096	0.39	0.26	0.017	0.079	0.48	-0.12	0.28	-0.068	0.54	0.19	0.086	-0.048	0.67
HSF2	blue	0.21	0.054	-0.21	0.054	-0.001	0.99	-0.16	0.15	-0.19	0.088	0.03	0.79	0.13	0.25	0.14	0.22	-0.0066	0.95	0.35	0.001	0.088	0.43
MED4	blue	-0.052	0.64	0.052	0.64	-0.091	0.41	0.099	0.37	-0.046	0.68	0.17	0.12	-0.041	0.71	-0.25	0.021	-0.046	0.68	-0.21	0.052	-0.21	0.06
MPP1	blue	0.0089	0.94	-0.0089	0.94	0.25	0.022	0.33	0.0025	0.41	0.00011	-0.19	0.091	-0.19	0.085	-0.13	0.25	0.1	0.36	0.33	0.0023	0.22	0.044
TDRKH	blue	-0.026	0.81	0.026	0.81	0.042	0.7	-0.051	0.64	-0.043	0.7	-0.08	0.47	-0.11	0.32	0.12	0.28	0.043	0.7	0.11	0.32	0.057	0.61
FAF2	blue	0.02	0.86	-0.02	0.86	-0.25	0.022	0.11	0.32	0.0086	0.94	0.16	0.16	0.12	0.27	-0.16	0.15	-0.063	0.57	-0.21	0.059	-0.055	0.62
PPAN	blue	-0.041	0.71	0.041	0.71	-0.19	0.092	-0.075	0.5	-0.19	0.085	0.046	0.68	-0.016	0.89	0.028	0.8	-0.092	0.41	0.084	0.45	-0.17	0.12
ARRDC2	blue	0.2	0.071	-0.2	0.071	0.21	0.059	-0.0065	0.95	0.11	0.34	-0.25	0.02	-0.089	0.42	0.13	0.23	0.23	0.033	0.43	4.7e-05	0.3	0.0068
FBXO40	blue	0.4	0.00021	-0.4	0.00021	0.16	0.15	-0.15	0.18	0.016	0.89	-0.22	0.048	0.054	0.62	0.14	0.2	0.044	0.69	0.87	7.3e-27	0.41	0.00014
NR4A3	blue	0.33	0.0026	-0.33	0.0026	0.26	0.019	0.11	0.32	0.35	0.0011	-0.16	0.14	-0.11	0.33	-0.095	0.39	0.2	0.065	0.58	9.4e-09	0.29	0.0074
GPRC5A	blue	-0.21	0.053	0.21	0.053	-0.018	0.87	-0.057	0.61	-0.14	0.21	0.097	0.38	-0.12	0.29	-0.16	0.15	-0.15	0.18	-0.22	0.049	-0.2	0.065
GOLGA4	blue	0.16	0.16	-0.16	0.16	0.021	0.85	-0.023	0.84	-0.098	0.38	0.32	0.0032	0.15	0.17	-0.18	0.11	-0.028	0.8	0.21	0.058	0.012	0.91
RUVBL2	blue	-0.11	0.32	0.11	0.32	-0.2	0.067	-0.2	0.075	-0.24	0.027	-0.012	0.92	-0.058	0.6	0.11	0.33	-0.054	0.63	-0.22	0.049	-0.24	0.027
TRAPPC11	blue	0.18	0.1	-0.18	0.1	-0.045	0.68	0.017	0.88	-0.021	0.85	0.19	0.094	0.18	0.11	-0.056	0.62	-0.067	0.54	0.16	0.15	-0.036	0.74
MPPE1	blue	0.15	0.18	-0.15	0.18	-0.064	0.56	-0.041	0.72	-0.11	0.33	0.13	0.26	0.12	0.28	0.025	0.82	-0.077	0.49	0.24	0.026	0.072	0.52
ARRDC1	blue	-0.035	0.75	0.035	0.75	-0.32	0.003	0.05	0.65	-0.12	0.29	0.12	0.26	0.091	0.41	-0.073	0.51	-0.13	0.24	-0.23	0.034	-0.18	0.096
EIF2B5	blue	-0.072	0.52	0.072	0.52	0.031	0.78	-0.31	0.0039	-0.2	0.065	-0.1	0.37	0.19	0.089	0.33	0.0025	0.031	0.78	0.19	0.079	0.0093	0.93
VBP1	blue	-0.033	0.77	0.033	0.77	-0.15	0.18	-0.16	0.15	-0.29	0.0082	0.15	0.17	0.12	0.26	0.025	0.82	-0.064	0.56	0.091	0.41	-0.098	0.38
IMMT	blue	0.088	0.43	-0.088	0.43	-0.065	0.56	-0.075	0.5	-0.094	0.4	0.0078	0.94	0.14	0.21	0.01	0.93	-0.016	0.89	0.25	0.022	0.01	0.93
GCAT	blue	0.22	0.042	-0.22	0.042	-0.26	0.016	-0.3	0.0062	-0.39	0.00029	0.0017	0.99	0.17	0.13	0.12	0.29	0.078	0.48	0.15	0.16	0.004	0.97
RHOT1	blue	0.17	0.13	-0.17	0.13	0.005	0.96	-0.029	0.79	-0.081	0.47	0.12	0.27	0.19	0.079	-0.059	0.6	0.029	0.79	0.23	0.04	-0.017	0.88
CDC40	blue	0.088	0.43	-0.088	0.43	0.048	0.67	0.011	0.92	0.054	0.63	0.17	0.13	0.16	0.14	-0.0082	0.94	-0.0077	0.95	0.12	0.26	-0.012	0.91
ZNF140	blue	0.16	0.15	-0.16	0.15	-0.035	0.76	-0.035	0.76	0.0033	0.98	-0.004	0.97	0.13	0.26	-0.014	0.9	-0.11	0.33	0.24	0.029	0.16	0.15
LANCL1	blue	0.23	0.04	-0.23	0.04	0.072	0.52	-0.077	0.49	-0.11	0.33	0.14	0.21	0.17	0.12	0.1	0.35	0.23	0.036	0.28	0.01	0.21	0.052
EZR	blue	-0.16	0.16	0.16	0.16	-0.31	0.005	0.0035	0.97	-0.17	0.14	0.35	0.0012	0.22	0.049	-0.092	0.41	-0.02	0.86	-0.36	0.00097	-0.31	0.0046
FBXL17	blue	0.16	0.15	-0.16	0.15	-0.019	0.86	0.2	0.075	0.13	0.24	0.24	0.027	0.29	0.0083	-0.13	0.24	-0.046	0.68	0.2	0.072	0.11	0.32
MYBPC2	blue	0.24	0.029	-0.24	0.029	0.33	0.0025	-0.17	0.13	0.053	0.63	-0.21	0.058	-0.073	0.51	0.077	0.49	0.042	0.7	0.79	8.2e-19	0.23	0.039
CDO1	blue	0.42	9.3e-05	-0.42	9.3e-05	0.33	0.0022	-0.17	0.13	0.17	0.12	-0.3	0.0057	0.055	0.62	0.27	0.014	0.14	0.21	0.77	2.2e-17	0.61	6.8e-10
DTWD1	blue	0.052	0.64	-0.052	0.64	0.0076	0.95	-0.12	0.29	-0.15	0.18	-0.17	0.13	-0.0064	0.95	0.15	0.17	-0.021	0.85	0.26	0.018	0.12	0.28
DOCK10	blue	0.00029	1	-0.00029	1	0.41	0.00014	0.21	0.054	0.45	2e-05	0.05	0.65	-0.014	0.9	-0.11	0.34	-0.079	0.48	0.3	0.0056	0.06	0.59
MAVS	blue	0.079	0.48	-0.079	0.48	-0.0016	0.99	-0.11	0.34	-0.057	0.61	0.028	0.8	0.12	0.26	0.14	0.2	-0.052	0.64	0.23	0.033	0.06	0.59
SF3B6	blue	-0.11	0.3	0.11	0.3	-0.2	0.065	-0.087	0.43	-0.21	0.052	0.19	0.079	0.034	0.76	-0.035	0.75	-0.065	0.56	-0.23	0.037	-0.25	0.025
C1RL	blue	-0.081	0.47	0.081	0.47	0.29	0.0082	-0.018	0.87	0.056	0.61	-0.22	0.047	-0.13	0.22	0.15	0.16	-0.04	0.72	0.23	0.037	0.16	0.15
ANXA7	blue	0.04	0.72	-0.04	0.72	-0.058	0.6	-0.04	0.72	-0.089	0.42	0.19	0.094	0.13	0.25	-0.0057	0.96	0.0074	0.95	0.17	0.12	0.035	0.76
SLC25A4	blue	0.37	0.00049	-0.37	0.00049	-0.00072	0.99	-0.34	0.0017	-0.21	0.06	-0.25	0.025	0.26	0.02	0.45	1.7e-05	0.23	0.04	0.58	7.2e-09	0.41	0.00013
IARS2	blue	0.086	0.44	-0.086	0.44	-0.15	0.18	-0.12	0.27	-0.18	0.094	0.13	0.26	0.22	0.045	0.048	0.66	0.1	0.37	0.084	0.45	5e-05	1
COX6C	blue	0.15	0.19	-0.15	0.19	-0.096	0.39	-0.067	0.54	-0.079	0.48	-0.029	0.8	0.099	0.37	0.13	0.25	-0.026	0.81	0.22	0.051	0.083	0.45
CCNY	blue	0.19	0.081	-0.19	0.081	-0.012	0.91	-0.13	0.24	-0.11	0.32	0.059	0.6	0.084	0.45	0.036	0.75	0.016	0.89	0.28	0.0098	0.19	0.084
TAB3	blue	-0.077	0.49	0.077	0.49	-0.014	0.9	0.11	0.31	-0.0064	0.95	0.19	0.087	0.028	0.8	-0.22	0.046	-0.055	0.62	-0.15	0.18	-0.11	0.32
SLC25A14	blue	0.17	0.12	-0.17	0.12	-0.015	0.9	-0.033	0.76	-0.05	0.66	0.15	0.19	0.21	0.054	-0.056	0.61	0.035	0.75	-0.087	0.43	0.023	0.84
CDKN2AIPNL	blue	0.045	0.69	-0.045	0.69	-0.19	0.084	-0.091	0.41	-0.21	0.054	0.14	0.22	0.084	0.45	0.052	0.64	0.086	0.44	0.0054	0.96	-0.047	0.67
MAP3K11	blue	-0.16	0.15	0.16	0.15	-0.28	0.011	0.035	0.75	-0.11	0.32	0.1	0.36	0.056	0.62	-0.016	0.88	-0.03	0.79	-0.3	0.0051	-0.25	0.023
SFT2D1	blue	0.059	0.6	-0.059	0.6	-0.21	0.06	0.065	0.56	-0.15	0.19	-0.035	0.75	0.052	0.64	-0.19	0.091	-0.062	0.58	0.066	0.55	-0.049	0.66
TRPC1	blue	0.11	0.32	-0.11	0.32	0.24	0.029	-0.25	0.023	-0.13	0.23	-0.27	0.015	-0.1	0.35	0.21	0.055	0.24	0.029	0.42	6.8e-05	0.14	0.21
THUMPD3	blue	0.097	0.38	-0.097	0.38	-0.02	0.86	0.24	0.028	0.16	0.16	0.13	0.26	0.0085	0.94	-0.19	0.079	0.034	0.76	0.16	0.14	0.0005	1
MT-ND5	blue	0.29	0.0082	-0.29	0.0082	-0.014	0.9	-0.023	0.83	0.0085	0.94	0.068	0.54	0.29	0.0083	-0.046	0.68	0.18	0.1	0.3	0.0056	0.28	0.011
RGS16	blue	0.14	0.2	-0.14	0.2	0.52	3.7e-07	0.059	0.59	0.37	0.00061	-0.32	0.0028	-0.14	0.22	0.17	0.12	0.028	0.8	0.66	1.1e-11	0.34	0.0015
FICD	blue	-0.069	0.54	0.069	0.54	0.16	0.16	0.016	0.89	0.07	0.53	-0.041	0.71	-0.2	0.064	-0.077	0.49	-0.066	0.56	0.13	0.24	0.028	0.8
FCMR	blue	-0.02	0.85	0.02	0.85	0.3	0.0053	0.18	0.096	0.25	0.022	0.11	0.32	-0.13	0.23	-0.27	0.014	-0.09	0.42	0.13	0.24	0.046	0.68
SLC25A46	blue	0.1	0.35	-0.1	0.35	0.0028	0.98	0.18	0.1	0.056	0.61	-0.12	0.26	-0.087	0.44	-0.21	0.055	-0.1	0.36	0.29	0.0087	-0.022	0.84
DHCR24	blue	0.22	0.048	-0.22	0.048	-0.44	2.5e-05	0.011	0.92	-0.2	0.066	0.43	4.7e-05	0.36	0.00074	-0.21	0.053	0.3	0.0057	-0.35	0.0013	-0.019	0.87
ZNF25	blue	0.31	0.0038	-0.31	0.0038	0.25	0.022	0.025	0.82	0.25	0.025	0.029	0.8	0.15	0.17	0.037	0.74	0.2	0.076	0.57	2.3e-08	0.31	0.0048
TATDN1	blue	0.0011	0.99	-0.0011	0.99	-0.012	0.92	-0.2	0.071	-0.17	0.12	-0.091	0.41	0.052	0.64	0.28	0.0099	0.13	0.26	0.21	0.057	0.0032	0.98
CCDC88B	blue	-0.14	0.22	0.14	0.22	-0.12	0.26	0.00039	1	-0.15	0.17	0.22	0.045	0.041	0.72	-0.1	0.36	-0.098	0.38	-0.18	0.11	-0.13	0.24
FAR1	blue	0.032	0.78	-0.032	0.78	-0.082	0.46	-0.083	0.46	-0.19	0.081	0.2	0.074	0.21	0.052	0.018	0.87	-0.0027	0.98	0.22	0.048	-0.09	0.42
GTPBP3	blue	-0.026	0.82	0.026	0.82	0.15	0.19	-0.14	0.22	0.032	0.77	-0.047	0.67	0.0015	0.99	0.2	0.075	-0.063	0.57	0.19	0.078	-0.067	0.55
DHRS13	blue	-0.13	0.24	0.13	0.24	-0.042	0.71	0.18	0.11	0.094	0.4	0.06	0.59	0.054	0.63	-0.08	0.47	0.062	0.58	-0.15	0.19	-0.035	0.76
PTBP2	blue	0.11	0.33	-0.11	0.33	0.098	0.38	-0.11	0.33	-0.094	0.4	-0.052	0.64	0.063	0.57	0.16	0.16	0.1	0.36	0.28	0.01	0.15	0.17
ENTPD6	blue	-0.18	0.096	0.18	0.096	-0.15	0.18	0.15	0.17	-0.022	0.85	-0.068	0.54	-0.13	0.23	-0.1	0.35	-0.08	0.47	-0.16	0.15	-0.13	0.24
C15orf41	blue	0.019	0.87	-0.019	0.87	-0.057	0.61	-0.33	0.0026	-0.39	0.00025	0.047	0.68	0.057	0.61	0.13	0.23	-0.1	0.36	0.2	0.072	-0.069	0.54
MAT2A	blue	0.13	0.23	-0.13	0.23	-0.14	0.21	0.089	0.42	0.02	0.86	0.18	0.11	0.23	0.037	-0.18	0.1	-0.03	0.79	0.16	0.14	0.039	0.73
RAPGEF1	blue	-0.057	0.61	0.057	0.61	0.17	0.13	0.052	0.64	0.04	0.72	-0.12	0.27	-0.25	0.025	-0.23	0.034	-0.1	0.35	0.28	0.012	-0.14	0.2
IFT81	blue	-0.09	0.42	0.09	0.42	0.095	0.39	-0.04	0.72	-0.18	0.1	-0.13	0.25	-0.13	0.23	0.018	0.87	0.0064	0.95	0.097	0.38	-0.057	0.61
ZNF765	blue	0.13	0.24	-0.13	0.24	-0.14	0.19	-0.081	0.47	-0.1	0.37	0.026	0.82	0.15	0.17	-0.023	0.83	-0.085	0.45	0.16	0.14	-0.17	0.13
MT-ND4	blue	0.32	0.0028	-0.32	0.0028	-0.011	0.92	-0.21	0.058	-0.12	0.28	0.069	0.53	0.21	0.052	0.096	0.39	0.12	0.3	0.46	1e-05	0.31	0.0043
CCNT2	blue	-0.04	0.72	0.04	0.72	-0.12	0.29	0.059	0.59	-0.023	0.83	0.022	0.84	-0.079	0.48	-0.12	0.27	0.081	0.47	-0.11	0.31	-0.064	0.57
NISCH	blue	0.29	0.0075	-0.29	0.0075	0.035	0.76	-0.19	0.09	-0.13	0.24	0.16	0.16	0.25	0.021	0.012	0.91	0.17	0.12	0.22	0.042	0.21	0.062
AGPAT4	blue	-0.24	0.027	0.24	0.027	-0.11	0.32	0.072	0.52	-0.051	0.65	0.24	0.028	-0.064	0.57	-0.11	0.3	-0.16	0.14	-0.32	0.0028	-0.38	0.00047
TMEM18	blue	0.22	0.047	-0.22	0.047	-0.097	0.39	-0.038	0.74	-0.009	0.94	0.14	0.21	0.17	0.12	0.036	0.74	0.2	0.071	0.16	0.15	0.095	0.39
PDP2	blue	0.028	0.8	-0.028	0.8	-0.19	0.078	-0.073	0.51	-0.11	0.33	0.21	0.052	0.15	0.19	0.15	0.17	0.12	0.29	-0.2	0.074	-0.091	0.41
CRIP2	blue	0.12	0.28	-0.12	0.28	0.098	0.38	-0.11	0.31	-0.032	0.77	-0.038	0.73	-0.052	0.64	0.0029	0.98	0.15	0.18	0.22	0.051	0.061	0.58
CRPPA	blue	0.097	0.38	-0.097	0.38	0.21	0.062	-0.31	0.0047	-0.091	0.41	-0.047	0.67	0.13	0.26	0.31	0.0045	0.084	0.45	0.36	0.00098	0.2	0.067
PDPK1	blue	0.22	0.042	-0.22	0.042	0.08	0.47	-0.13	0.25	-0.055	0.62	0.23	0.035	0.17	0.14	-0.0026	0.98	0.077	0.49	0.29	0.007	0.16	0.15
FEZ2	blue	-0.03	0.79	0.03	0.79	0.028	0.8	-0.016	0.89	-0.041	0.71	0.072	0.52	-0.011	0.92	-0.1	0.35	-0.16	0.15	0.17	0.12	-0.0094	0.93
SFMBT2	blue	-0.1	0.35	0.1	0.35	0.28	0.01	0.27	0.012	0.39	0.00029	-0.079	0.48	-0.12	0.29	0.045	0.69	-0.11	0.33	0.23	0.035	0.073	0.51
MYLPF	blue	0.22	0.048	-0.22	0.048	0.24	0.031	-0.2	0.077	-0.056	0.62	-0.29	0.0078	-0.05	0.65	0.15	0.18	0.026	0.81	0.78	3.7e-18	0.2	0.069
ENO1	blue	-0.1	0.37	0.1	0.37	-0.15	0.18	0.053	0.63	-0.18	0.11	0.11	0.33	-0.025	0.82	-0.17	0.13	-0.13	0.25	-0.31	0.0048	-0.25	0.025
NDUFV2	blue	0.24	0.029	-0.24	0.029	-0.11	0.3	-0.11	0.31	-0.089	0.42	0.14	0.22	0.22	0.044	0.079	0.48	-0.00036	1	0.15	0.19	0.062	0.57
CCDC50	blue	0.097	0.38	-0.097	0.38	0.097	0.38	0.18	0.099	0.14	0.2	-0.0037	0.97	-0.018	0.87	-0.14	0.21	0.25	0.022	0.18	0.11	0.024	0.83
E2F6	blue	-0.12	0.28	0.12	0.28	0.23	0.033	0.017	0.88	0.021	0.85	-0.041	0.71	-0.13	0.23	4.3e-05	1	-0.19	0.091	0.25	0.021	-0.15	0.18
MYH1	blue	0.11	0.34	-0.11	0.34	0.29	0.0071	-0.2	0.064	-0.017	0.88	-0.26	0.016	-0.058	0.6	0.2	0.07	0.072	0.52	0.68	2.3e-12	0.17	0.12
GOLM1	blue	0.002	0.99	-0.002	0.99	0.46	1.5e-05	0.29	0.0083	0.42	8.3e-05	-0.29	0.007	-0.27	0.014	-0.015	0.89	0.042	0.71	0.43	5.4e-05	0.19	0.092
MED19	blue	0.02	0.86	-0.02	0.86	-0.28	0.011	0.075	0.5	-0.11	0.33	0.092	0.41	0.071	0.52	-0.083	0.46	0.15	0.18	-0.15	0.17	-0.16	0.15
SOD1	blue	0.11	0.33	-0.11	0.33	-0.27	0.013	-0.043	0.7	-0.19	0.084	0.0091	0.93	0.16	0.15	0.04	0.72	0.026	0.82	0.052	0.64	0.069	0.54
TMEM208	blue	-0.22	0.043	0.22	0.043	-0.086	0.44	0.061	0.59	-0.026	0.82	0.081	0.46	0.042	0.71	0.1	0.35	-0.075	0.5	-0.16	0.16	-0.19	0.094
INTS5	blue	-0.057	0.61	0.057	0.61	-0.059	0.59	-0.044	0.69	-0.11	0.33	0.12	0.29	0.05	0.66	0.012	0.92	0.087	0.43	-0.15	0.17	-0.17	0.13
WBP4	blue	0.12	0.27	-0.12	0.27	0.044	0.69	0.038	0.74	0.032	0.77	-0.0072	0.95	-0.025	0.82	-0.18	0.1	-0.063	0.57	0.28	0.0098	0.038	0.73
NR4A2	blue	0.24	0.028	-0.24	0.028	-0.022	0.85	-0.013	0.91	0.13	0.25	-0.079	0.48	0.25	0.021	0.18	0.099	0.16	0.14	0.24	0.029	0.19	0.085
DPF3	blue	0.31	0.0049	-0.31	0.0049	0.18	0.096	-0.026	0.82	0.1	0.35	-0.26	0.019	-0.046	0.68	0.078	0.48	0.059	0.6	0.8	6.1e-20	0.35	0.0012
AP1S2	blue	0.082	0.46	-0.082	0.46	0.38	0.00033	0.012	0.91	0.22	0.05	-0.17	0.13	-0.15	0.18	0.075	0.5	0.07	0.53	0.56	3e-08	0.23	0.035
NICN1	blue	0.28	0.01	-0.28	0.01	-0.093	0.4	0.071	0.52	0.072	0.52	0.05	0.65	0.24	0.029	-0.0023	0.98	0.066	0.56	0.24	0.026	0.25	0.02
ATRX	blue	-0.14	0.2	0.14	0.2	0.27	0.015	0.054	0.63	-0.0068	0.95	-0.0047	0.97	-0.046	0.68	-0.071	0.53	-0.11	0.33	0.072	0.52	-0.055	0.62
FBXW7	blue	0.27	0.015	-0.27	0.015	-0.045	0.69	0.04	0.72	0.022	0.84	0.29	0.0076	0.17	0.12	-0.21	0.059	0.19	0.079	0.19	0.088	0.05	0.65
ZNF891	blue	0.052	0.64	-0.052	0.64	0.07	0.53	-0.23	0.034	-0.12	0.29	-0.18	0.11	0.091	0.41	0.2	0.064	0.024	0.83	0.15	0.17	0.013	0.91
EPB41L3	blue	0.33	0.0023	-0.33	0.0023	0.19	0.083	0.0021	0.98	0.23	0.037	0.19	0.089	0.28	0.011	-0.092	0.41	0.13	0.23	0.35	0.0011	0.23	0.036
TRPT1	blue	0.29	0.0089	-0.29	0.0089	-0.14	0.21	-0.14	0.21	-0.19	0.081	0.2	0.063	0.18	0.11	-0.15	0.18	-0.037	0.74	0.19	0.082	0.12	0.29
SSBP3	blue	0.052	0.64	-0.052	0.64	-0.23	0.04	0.035	0.75	-0.0061	0.96	0.092	0.41	0.19	0.083	0.07	0.53	0.26	0.017	-0.12	0.29	0.049	0.66
PABPC1	blue	-0.053	0.64	0.053	0.64	-0.16	0.16	-0.14	0.21	-0.14	0.22	0.46	1.2e-05	0.3	0.0056	0.09	0.42	-0.16	0.16	-0.33	0.0023	-0.13	0.23
RP2	blue	-0.073	0.51	0.073	0.51	-0.008	0.94	0.08	0.47	0.12	0.28	0.19	0.092	0.15	0.17	-0.1	0.35	-0.16	0.14	-0.19	0.083	-0.22	0.049
ZFYVE26	blue	-0.13	0.25	0.13	0.25	0.036	0.74	0.3	0.0066	0.12	0.27	0.27	0.013	-0.074	0.51	-0.31	0.0037	0.055	0.62	-0.16	0.14	-0.15	0.17
PAMR1	blue	0.33	0.002	-0.33	0.002	0.14	0.19	-0.24	0.031	-0.073	0.51	-0.09	0.42	0.23	0.038	0.23	0.036	0.26	0.016	0.51	7.9e-07	0.46	1.2e-05
CEP120	blue	0.09	0.42	-0.09	0.42	0.076	0.49	-0.021	0.85	0.018	0.87	-0.11	0.32	0.024	0.83	0.0061	0.96	-0.043	0.7	0.17	0.12	0.026	0.82
TMEM199	blue	-0.052	0.64	0.052	0.64	-0.013	0.91	-0.081	0.47	-0.14	0.21	0.088	0.43	0.13	0.23	0.11	0.31	-0.061	0.58	-0.074	0.51	-0.091	0.42
[truncated: 11,711 more rows]
